# Supplementary material for: The Structure of Evolutionary Model Space for Proteins Across the Tree of Life
Source: Preprints.org preprint supplement (doi:10.20944/preprints202212.0403.v1), 2022-12-21
Supplement: Supplementary file 1 [file supplementary]

**(a)**

## Estimated Equilibrium Frequencies of Aromatic Amino Acids

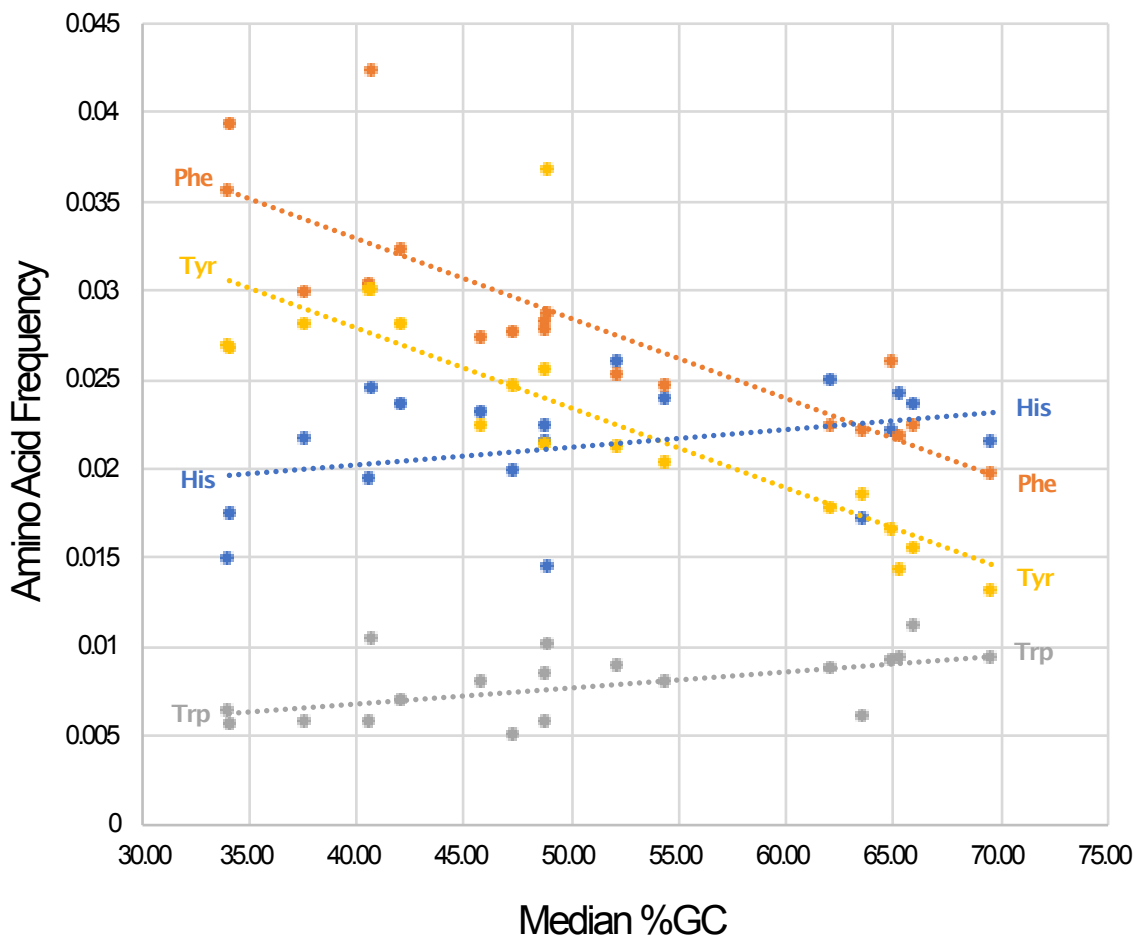**(b)**

## Correlations between Selected Amino Acid Frequency Estimates and Genomic GC-content

|         | Spearmen's $\rho$ | $P$ (two-tailed) |
|---------|-------------------|------------------|
| His (H) | 0.29574           | 0.21895          |
| Phe (F) | -0.9118           | <0.00001         |
| Trp (W) | 0.60728           | 0.00582          |
| Tyr (Y) | -0.8416           | 0.00001          |
| Ala (A) | 0.9118            | <0.00001         |
| Cys (C) | -0.37209          | 0.11671          |
| Ser (S) | -0.31856          | 0.18376          |
