# Supplementary material for: The Structure of Evolutionary Model Space for Proteins Across the Tree of Life
Source: Preprints.org preprint supplement (doi:10.20944/preprints202212.0403.v1), 2022-12-21
Supplement: Supplementary file 1 [file supplementary]

## Sheet: 3. ribo vs general
#	Exchange	Min subs	Xanthomonadaceae	Archaea_Thermoprotei	Archaea_Thaumarchaeota	Selenomonadales	Eukaryote_Pezizomycotina	Oceanospirillales	Micrococcineae	Archaea_Methanomicrobia	Lactobacillales	Archaea_Halobacteriaceae	Enterobacteriaceae	Archaea_DPANN	Cytophagales	Comamonadaceae	Eukaryote_Coelomata	Chromatiales	Alteromonadaceae	NM_Xanthomonadaceae	NM_Thermoprotei	NM_Thaumarchaeota	NM_Selenomonadales	NM_Pizizomycotina	NM_Oceanospirillales	NM_Micrococcineae	NM_Methanomicrobia	NM_Lactobacillales	NM_Halobacteriaceae	NM_Enterobacteriaceae	NM_DPANN	NM_Cytophagales	NM_Comamonadaceae	NM_Coelomata	NM_Chromatiales	NM_Alteromonadaceae	NM_Rhodospirillales	NM_Bacillaceae		mean	mean rib	mean all prot		Difference rib-all prot
1	A<->R	2	0.000600881	0.000400671	7.2328e-05	8.72271e-05	0.00127281	0.0003585	0.000701858	0.000587559	0.000846811	0.00121809	0.00123665	0.000496428	0.000525682	0.00052521	0.00215348	0.000579579	0.000359425	0.00196005	0.00139938	0.00144387	0.00140388	0.00196955	0.00166581	0.0028194	0.00175493	0.00136502	0.00204563	0.000991351	0.00133355	0.00141429	0.00184559	0.00213	0.00227	0.00161474	0.00250026	0.00138271		0.00125926	0.000707246	0.00175316		-0.00104591
2	A<->N	2	0.00432257	0.00445582	0.00365825	0.000760265	0.00284314	0.00554119	0.00205735	0.00339473	0.0029013	0.00457151	0.00209011	0.00138877	0.00383847	0.00346727	0.00290141	0.00243746	0.00527423	0.001132	0.000736123	0.000835679	0.000775325	0.00118685	0.00128635	0.00127064	0.00050091	0.0012583	0.00121608	0.000842833	0.00081419	0.001169	0.000935	0.00133	0.0011216	0.00124	0.00135904	0.000514392		0.00209523	0.00328846	0.00102759		0.00226087
3	R<->N	2	0.0017114	0.00269292	0.00129401	0.000365177	0.0020326	0.000934705	0.00208446	0.00175914	0.00229753	0.00119682	0.00274631	0.00416468	0.00190703	0.00163342	0.00224567	0.00289907	0.00173025	0.00255378	0.00450301	0.0031637	0.00309054	0.00317346	0.0032685	0.00328993	0.00333557	0.00340566	0.00385324	0.00255303	0.00337908	0.00422	0.00222	0.0036009	0.00269	0.00322	0.00334407	0.00401342		0.00268259	0.00198207	0.00330936		-0.00132729
4	A<->D	1	0.00321847	0.00469737	0.00335842	0.00167959	0.00187955	0.00383034	0.00177642	0.00541194	0.00252131	0.00293849	0.00173422	0.00150858	0.00167123	0.00190396	0.00343245	0.00214463	0.00410934	0.00224469	0.000453529	0.00177991	0.00210929	0.00167629	0.00188336	0.00206859	0.000884931	0.00169411	0.0024025	0.00240542	0.00106	0.00147	0.00228861	0.00208	0.00258	0.00192	0.00202626	0.00100434		0.00227356	0.00281272	0.00179115		0.00102157
5	R<->D	2	0.000628179	0.000270713	0.000215701	5.09653e-07	0.00015318	2.04952e-05	0.0003694	4.33552e-07	5.09728e-07	4.21607e-07	0.000149652	0.000762446	0.000516959	1.13148e-05	0.0014306	4.80209e-07	0.000410596	0.000317923	0.000326413	0.000555321	0.000161717	0.000523706	0.000273865	0.000637054	0.000176855	0.00014314	0.000436851	9.86e-05	0.000438	0.000166318	0.000216	0.000669	0.000275	0.000127	0.000436101	0.000223148		0.000309545	0.000290682	0.000326422		-3.57396e-05
6	N<->D	1	0.0156475	0.0300201	0.031613	0.0377744	0.0353837	0.0355267	0.0261962	0.0316868	0.0170108	0.0226856	0.0188817	0.0351613	0.0246072	0.0265727	0.0197011	0.0308456	0.0278094	0.0220562	0.029571	0.0280407	0.0245361	0.0210848	0.0212869	0.0182419	0.0254957	0.0234396	0.0212653	0.0243	0.0262665	0.0179	0.022	0.0247	0.0232	0.0216	0.0213155	0.0247626		0.0252274	0.0274779	0.0232138		0.00426404
7	A<->C	2	0.0292662	0.0200873	0.00967572	0.00561656	0.0199405	0.0276887	0.0152204	0.0100328	0.0143267	0.0291827	0.018338	0.00589759	0.0294936	0.0302029	0.019244	0.0320757	0.0165081	0.00944731	0.0117957	0.0104831	0.0143249	0.00929385	0.0139665	0.01329	0.0141251	0.022741	0.00938	0.00500441	0.0208	0.0155	0.00806	0.0114	0.00883	0.0131	0.0138263	0.0194908		0.016046	0.0195763	0.0128873		0.00668901
8	R<->C	1	0.00554778	0.0189832	0.00422655	0.0271177	0.00485638	0.00442497	0.00578641	0.0019189	0.00214574	0.00112324	0.00509664	0.00551992	0.00845313	0.00195363	0.0023831	0.00427295	0.00595752	0.00633066	0.00112326	0.0039634	0.00799701	0.00412198	0.00472959	0.00166573	0.00346187	0.00411	0.0082124	0.0107	0.00162	0.00272	0.00514	0.00387	0.00792	0.0041	0.00200729	0.00309365		0.00546263	0.00645692	0.00457299		0.00188393
9	N<->C	2	0.00951346	4.35602e-07	0.0135189	0.00748424	0.00578589	0.015662	0.00702636	0.00012234	0.00632339	0.00135614	0.00162935	0.00162602	0.0142492	0.00921986	0.00542658	0.00684652	0.00228988	0.00324716	0.00143668	0.00195349	0.00205251	0.00234612	0.00267668	0.00435095	0.00266	0.00210495	0.00203	0.0018	0.0017	0.00103	0.00201	0.00271	0.00169	0.00228	0.0026458	0.00106313		0.004163	0.00635769	0.00219934		0.00415835
10	D<->C	2	5.12055e-07	0.000500502	0.00439358	5.09653e-07	5.45162e-07	0.00233749	0.00106412	0.0209746	5.09728e-07	0.00859544	0.00192649	0.000651258	0.00219134	0.00266521	1.71468e-07	4.80209e-07	0.002634	0.000144845	0.00171	0.000406875	0.000401613	0.00025358	0.000188543	9.38e-05	0.000132107	0.000256	0.000113	9.94e-05	0.000417	0.00023	0.000131	0.000451	0.000167	0.000267	0.000209564	0.000281939		0.00149697	0.00281981	0.000313382		0.00250643
11	A<->Q	2	0.00721348	0.0086619	0.00648044	0.00466117	0.00425261	0.00812262	0.00603854	0.0084256	0.00960011	0.0128246	0.00974062	0.00478083	0.0115791	0.00896869	0.00625015	0.00329107	0.00964092	0.00455689	0.00454432	0.00301327	0.00445222	0.00427639	0.00453771	0.00494093	0.00347	0.00474	0.0025883	0.00339	0.00385	0.00594	0.0045	0.00475	0.0042	0.00491	0.00544966	0.00390788		0.00590417	0.00767838	0.00431671		0.00336167
12	R<->Q	1	0.00681641	0.00644366	0.00602472	0.00263972	0.00894789	0.00443564	0.00710351	0.0132482	0.0104408	0.00406798	0.00762889	0.00649797	0.00546591	0.00472778	0.00752013	0.00570397	0.00625181	0.0113138	0.00853477	0.0127385	0.0130898	0.0128161	0.0105717	0.0118	0.0139	0.010623	0.0262	0.0113	0.0102	0.00964	0.0139	0.0136	0.0155	0.00953	0.0124194	0.0138206		0.00987396	0.00670382	0.0127104		-0.00600658
13	N<->Q	2	0.0126077	0.00664301	0.0131379	0.00668431	0.00598345	0.0143234	0.0116333	0.00547446	0.0118571	0.0126565	0.0147531	0.00966447	0.0199511	0.0111341	0.0166184	0.0107154	0.00602767	0.00764424	0.0115447	0.00681722	0.00753728	0.0064142	0.00773	0.0097	0.00702929	0.00762	0.00923	0.00539	0.0072	0.00705	0.00699	0.00797	0.00643	0.00788	0.00877684	0.00866886		0.00937466	0.0111685	0.00776961		0.00339894
14	D<->Q	2	0.00319854	0.0043373	0.00218445	0.00372551	0.00228529	0.0034077	0.00533893	0.00136625	0.00185136	0.00326831	0.00299614	0.00207455	0.00851143	0.00304136	0.00949369	0.00301604	0.00128235	0.00236246	0.00175762	0.00230363	0.00155139	0.00139	0.0017	0.00227365	0.0013	0.00184	0.00112	0.00119	0.00222	0.00149	0.00234	0.00255	0.00175	0.00199	0.00212723	0.00149788		0.00267036	0.00361054	0.00182915		0.00178139
15	C<->Q	3	5.12055e-07	4.35602e-07	0.00166219	0.000758863	0.00511992	0.00056461	0.000480598	4.33552e-07	0.004542	0.00238267	0.0031494	5.95066e-07	4.5246e-07	4.6429e-07	0.00146041	4.80209e-07	0.00338806	0.000224169	8.31e-06	0.000792	0.000271	0.000222	0.000279463	6.22e-05	0.000487	5.93e-05	0.00135	0.000568	0.000349	0.000395	0.000215	0.000477	0.000733	0.00048	0.000102223	6.03311e-05		0.000851308	0.00138307	0.000375526		0.00100754
16	A<->E	1	0.0051778	0.00591212	0.00635298	0.00368136	0.00999527	0.00591498	0.00592729	0.00617334	0.00695984	0.0104558	0.00792938	0.00807337	0.0109401	0.00661361	0.00268369	0.00618665	0.00580015	0.00520885	0.00243684	0.00426	0.00651	0.00488474	0.00564362	0.00534	0.00494	0.00573	0.00569	0.00697	0.00337	0.00508	0.0057	0.00525	0.00642	0.00634	0.00593564	0.0045931		0.00597446	0.00675163	0.00527909		0.00147254
17	R<->E	2	0.000458709	0.000812676	1.98608e-05	5.09653e-07	0.000951689	0.000107381	5.33607e-07	6.17856e-05	0.000791613	0.000434209	0.000484657	5.95066e-07	0.000309397	0.000248934	0.000555284	0.000127865	0.000345109	0.000713798	0.00186506	0.00131609	0.000671167	0.00101624	0.000733	0.00176	0.000823	0.000572	0.00216	0.000224	0.00109	0.000288	0.000537	0.00193	0.000938	0.00059	0.0014246	0.000809082		0.000699218	0.00033593	0.00102427		-0.000688335
18	N<->E	2	0.00219957	0.000924948	0.00617601	0.00239654	0.000730549	0.0034627	0.00115299	4.33552e-07	0.000909375	0.00424529	0.00153875	0.00296124	0.00245495	0.00463425	0.00295067	0.0047086	0.00376342	0.0010691	0.00301683	0.00272232	0.00125901	0.00145	0.00131	0.00132	0.00157	0.00162	0.00194	0.00122	0.00238	0.00117	0.000839	0.00257	0.00114	0.00153	0.00110742	0.0018746		0.00211996	0.00265943	0.00163728		0.00102215
19	D<->E	1	0.0453247	0.0449842	0.0513546	0.0384789	0.045398	0.0519774	0.0341109	0.0651897	0.0412131	0.0578897	0.0449438	0.0434865	0.045102	0.0320107	0.0378081	0.04691	0.035452	0.0242543	0.0222804	0.0299	0.0225	0.0291	0.0207	0.0192	0.0217	0.0188	0.0166	0.0287	0.0217	0.0217	0.0292	0.0271	0.0214	0.0224	0.0215161	0.0213427		0.0333813	0.044802	0.0231628		0.0216392
20	C<->E	3	5.12055e-07	4.35602e-07	4.47215e-07	5.09653e-07	5.45162e-07	4.57585e-07	5.33607e-07	0.000866892	5.09728e-07	0.000579655	4.50555e-07	0.000522813	4.5246e-07	4.6429e-07	0.000254455	4.80209e-07	5.12374e-07	1.91e-06	8.68e-07	2.21e-05	2.56e-05	2.02e-06	3.85e-07	2.86e-07	4.45e-06	5.83e-07	1.06e-05	5.05e-07	1.09e-05	2.67e-07	2.59e-07	3.13e-05	5.51e-06	1.04e-06	9.43355e-08	4.76627e-07		6.52578e-05	0.000131184	6.27126e-06		0.000124913
21	Q<->E	1	0.0223292	0.0255654	0.0197218	0.0136778	0.0206891	0.0169049	0.0253649	0.0235278	0.0210048	0.0173952	0.0216489	0.0220736	0.0313038	0.0246776	0.0208865	0.0279211	0.0218144	0.017027	0.0204796	0.0208	0.0158	0.0157774	0.0136033	0.0181299	0.0168032	0.0148	0.0142042	0.0132633	0.0169542	0.0123412	0.0173357	0.0196175	0.0154017	0.0146926	0.0175579	0.0144399		0.0190427	0.0221475	0.0162647		0.0058828
22	A<->G	1	0.00335028	0.00498561	0.00500862	0.00207741	0.00567139	0.00577908	0.00589203	0.00480019	0.00574985	0.00537891	0.00690534	0.00449301	0.00480977	0.00671161	0.00501844	0.00443905	0.00654976	0.00783584	0.0105273	0.0114541	0.00996904	0.00989326	0.00900004	0.00765613	0.0106	0.0105897	0.00900924	0.00920048	0.010811	0.0111694	0.0082709	0.0107734	0.00922938	0.00968822	0.00858279	0.0130476		0.00763689	0.00515414	0.00985831		-0.00470417
23	R<->G	1	0.00086886	0.000301585	0.000213956	0.000613036	0.000765919	0.000488298	0.00078373	0.000287194	0.000417783	0.000323946	0.000349856	0.00109376	0.000280797	0.000447525	0.00224528	0.000298772	0.000770503	0.00222043	0.00212252	0.00330921	0.00169981	0.00294421	0.00151058	0.00209	0.00213784	0.00138424	0.00188826	0.00213413	0.00249091	0.00243917	0.00236566	0.00276317	0.00244524	0.00141	0.00177445	0.00183994		0.00143113	0.000620635	0.0021563		-0.00153567
24	N<->G	2	0.00987303	0.00829195	0.00438104	0.00558155	0.0099356	0.0103338	0.00591015	0.00430069	0.00770626	0.00525733	0.00713785	0.0081324	0.0056856	0.00624103	0.00461926	0.00876104	0.00557949	0.0100035	0.0137192	0.00706285	0.00937723	0.00877898	0.00974	0.00793528	0.00896828	0.00869127	0.00627293	0.00923622	0.00860317	0.00945871	0.00900483	0.00719375	0.00832	0.00945763	0.00983811	0.00902788		0.00801161	0.00692518	0.00898368		-0.0020585
25	D<->G	1	0.00479885	0.00579159	0.00482036	0.00220817	0.00355993	0.00268625	0.00326842	0.00557762	0.0038863	0.00359277	0.0035582	0.00291925	0.00427166	0.00305561	0.00640136	0.00305784	0.0029558	0.00617509	0.00481621	0.006906	0.00554126	0.00551	0.00509021	0.00522839	0.00649882	0.00465044	0.00737331	0.00608899	0.00481568	0.00504708	0.00615306	0.00489	0.00639057	0.00531842	0.005507	0.00586397		0.00484096	0.00390647	0.00567708		-0.00177061
26	C<->G	1	0.00351555	0.00660065	0.00305403	0.00718365	0.00609514	0.00472962	0.00282925	4.33552e-07	0.000788238	4.21607e-07	4.50555e-07	0.00306024	0.00120673	4.6429e-07	0.000323366	4.80209e-07	0.00211514	0.00345149	0.00364001	0.00466	0.00428	0.00288492	0.00272088	0.00173398	0.0041942	0.00253985	0.00310025	0.00549621	0.00341434	0.00333638	0.00382	0.00344284	0.00352215	0.00307	0.00232682	0.00359919		0.00296493	0.0024414	0.00343334		-0.000991939
27	Q<->G	2	0.000592156	0.00147797	0.000532311	5.09653e-07	0.000489942	0.000736067	0.000931672	0.00119939	0.00297897	0.00160975	0.0027318	0.00110281	0.000215747	0.000889121	0.00159278	0.000836323	0.00136945	0.00189992	0.00141051	0.0012435	0.0015343	0.00189809	0.00151799	0.00189015	0.00180572	0.00151609	0.00234655	0.00119192	0.00163542	0.00186	0.00167964	0.00153982	0.00157	0.00138	0.00173488	0.00149229		0.00140093	0.00113452	0.0016393		-0.000504787
28	E<->G	1	0.000569006	0.00100258	0.000379247	0.00185282	0.0021747	0.00167366	0.000729867	4.33552e-07	0.000844997	0.000502754	0.00108061	0.00139871	0.000417322	0.00107121	0.00201434	0.000596722	0.00157219	0.00156452	0.00168404	0.0032857	0.00143147	0.00240197	0.00125398	0.00135912	0.00248267	0.00106319	0.00169932	0.00202973	0.00204	0.00141154	0.00157762	0.00243	0.00163	0.00104048	0.00129612	0.0017332		0.00142488	0.00105183	0.00175867		-0.000706832
29	A<->H	2	0.00470573	0.00502058	4.47215e-07	5.09653e-07	0.0012349	0.000867806	0.00178838	0.00112705	0.00321163	0.00277009	0.00118609	0.00327192	0.0026674	0.00213822	0.0024012	0.000823261	0.00266814	0.00167984	0.00149211	0.00144505	0.00101365	0.00150577	0.00163033	0.00224213	0.000789148	0.00164186	0.00159511	0.000916	0.001608	0.00206253	0.00136	0.00175	0.0015511	0.00173	0.00203773	0.00141088		0.00181513	0.00211078	0.00155059		0.000560193
30	R<->H	1	0.00753294	0.00284157	0.00217499	0.00921714	0.00527139	0.00241297	0.00646016	0.0036138	0.00888167	0.0042187	0.00509079	0.00783222	0.0051958	0.00673347	0.00834327	0.00380321	0.0100551	0.0133048	0.0101	0.0131795	0.017787	0.013038	0.0112994	0.0106971	0.0146002	0.0173215	0.0154	0.0173058	0.0105839	0.01	0.0135	0.0117537	0.0128	0.0103	0.0105773	0.012767		0.00961096	0.00586348	0.012964		-0.00710048
31	N<->H	1	0.0274907	0.0111068	0.024796	0.02287	0.0274856	0.0271466	0.0169415	0.0248674	0.0221994	0.0190737	0.0136906	0.0208649	0.0239706	0.0189919	0.012935	0.0197792	0.0225303	0.026721	0.0232967	0.0201179	0.0278871	0.0233454	0.0244079	0.029339	0.0258327	0.0266	0.0285427	0.0278406	0.0218	0.0248	0.0320343	0.0218	0.0282	0.0236	0.0251442	0.0282931		0.0235095	0.0209847	0.0257686		-0.00478385
32	D<->H	1	0.00198351	0.000788086	4.47215e-07	0.00251067	0.00177969	4.57585e-07	0.00335367	0.00146563	0.000571211	0.000735721	0.0010663	0.00259709	0.000300425	0.00243772	0.00392492	0.00239013	0.00334993	0.00398743	0.00390533	0.00452072	0.00255618	0.00368345	0.00311589	0.00394335	0.00212	0.00284649	0.00210354	0.00318	0.00346	0.0033009	0.00421	0.00466	0.00396	0.00318	0.0035207	0.00408029		0.00265527	0.00172092	0.00349128		-0.00177036
33	C<->H	2	5.12055e-07	0.0175025	4.47215e-07	0.0109563	0.00147702	4.57585e-07	0.00247673	4.33552e-07	5.09728e-07	0.00245734	0.00658972	0.00172112	0.00917416	0.000493234	0.000863014	4.80209e-07	0.00650893	0.00474001	0.00265	0.00423387	0.00393291	0.00351274	0.00418059	0.00279	0.00403631	0.00167626	0.00624	0.00355	0.00273733	0.00411	0.00463	0.00332	0.00625	0.00345	0.00345472	0.0030676		0.00368848	0.00354253	0.00381907		-0.000276543
34	Q<->H	1	0.0192304	0.0178308	0.0218373	0.0364935	0.0184193	0.0195956	0.0229701	0.014119	0.0287316	0.022982	0.0267371	0.0239739	0.0215365	0.0231714	0.0127855	0.0170404	0.0233986	0.0199454	0.0209	0.0271494	0.020055	0.0252751	0.0173	0.0180615	0.0244849	0.0168	0.0215	0.0200626	0.0221	0.0189	0.02	0.0243	0.0224	0.017	0.0195497	0.0206395		0.0213132	0.0218149	0.0208644		0.000950494
35	E<->H	2	0.00239956	4.35602e-07	0.000862605	0.000485256	0.000943555	0.000291331	0.000685204	4.33552e-07	0.000169663	4.21607e-07	4.50555e-07	0.000637143	4.5246e-07	0.000411152	0.000762993	4.80209e-07	5.12374e-07	0.00114978	0.00155457	0.0016179	0.00109025	0.00134	0.00125524	0.00190329	0.000868	0.00146	0.00126588	0.000909	0.00143	0.00118	0.00114	0.00209	0.00104	0.0017	0.00120772	0.00176867		0.000933943	0.000450097	0.00136686		-0.000916761
36	G<->H	2	0.00122728	0.00172211	4.47215e-07	5.09653e-07	5.45162e-07	4.57585e-07	0.000482823	0.000378868	0.000230973	0.000402335	0.000668768	0.000627699	0.000407825	0.000745019	0.00251411	4.80209e-07	0.00120384	0.00217046	0.00183693	0.00143	0.00262	0.00210348	0.00174308	0.00199	0.00203	0.00325927	0.00143	0.00202	0.00187	0.0009	0.00224	0.00172	0.00175	0.00134	0.00199918	0.00144234		0.00129191	0.000624358	0.0018892		-0.00126484
37	A<->I	2	0.0011803	4.35602e-07	4.47215e-07	0.00172304	2.60424e-05	4.57585e-07	5.33607e-07	1.10426e-05	0.000220366	0.00134859	2.14554e-05	5.95066e-07	0.000166809	4.6429e-07	0.000570252	7.9052e-05	1.90859e-05	0.000160387	0.000354968	0.000679287	0.000124955	0.000463846	0.000183	0.000147	0.000165142	0.000245	6.9e-05	0.000221	0.000745	0.000409	9.53e-05	0.000887	0.000146	0.000291	0.00017909	0.000271838		0.000311299	0.000315821	0.000307253		8.56763e-06
38	R<->I	1	5.12055e-07	0.000387877	4.47215e-07	0.000142025	7.04567e-05	2.04083e-06	0.000443875	4.33552e-07	0.000377596	0.000305901	8.31409e-05	0.000738209	0.00014229	0.000563226	0.000593789	0.000310431	0.000667972	0.000169337	0.000377122	0.000792296	0.000279853	0.00046	0.000312	0.000223973	0.00033	0.000512	0.000159	0.000263	0.000705	0.000441	8.59e-05	0.000816	0.000163	0.000451	0.000279362	0.000405016		0.000334863	0.000284131	0.000380256		-9.61249e-05
39	N<->I	1	5.12055e-07	0.00230469	0.000143489	0.000569308	5.45162e-07	0.0001779	0.000920114	0.00048022	0.000310919	0.000963924	0.000442522	0.000914206	0.00045855	0.000799192	0.00080316	0.000561571	0.000791315	0.000839756	0.000468	0.00092	0.000256	0.00109	0.000428792	0.000548	0.000517	0.000467	0.000479	0.000636	0.000718	0.00036	0.000654	0.00152	0.000525	0.000391	0.00066975	0.000310281		0.000623326	0.000626008	0.000620925		5.08289e-06
40	D<->I	2	5.12055e-07	4.35602e-07	4.47215e-07	5.09653e-07	5.45162e-07	4.57585e-07	5.33607e-07	4.33552e-07	5.09728e-07	4.21607e-07	4.50555e-07	2.30588e-05	4.5246e-07	9.3861e-05	0.00209832	4.80209e-07	0.000245294	4.55e-05	1.58e-05	0.000166	2.03e-05	0.000173887	2.53e-05	2.4e-05	2.08e-05	1.6e-05	2.55e-05	1.67e-05	4.16e-05	2.99e-05	3.39e-05	0.000136	1.88e-05	7.6e-06	5.61724e-06	6.26377e-06		9.15608e-05	0.000145101	4.36562e-05		0.000101445
41	C<->I	2	0.00426077	0.00776137	4.47215e-07	5.09653e-07	5.45162e-07	4.57585e-07	0.000710124	4.33552e-07	0.000480633	0.00128995	0.00433075	0.00102049	0.0015064	0.00149907	0.00427242	4.80209e-07	5.12374e-07	0.00104699	0.000233983	0.00132239	0.000925721	0.00169	0.00155	0.000656	0.000889	0.00127	0.000274	0.00215	0.00119	0.000719	0.000799	0.00176	0.0011	0.00196	0.00132344	0.000705223		0.00135278	0.0015962	0.00113499		0.000461212
42	Q<->I	2	0.000612838	4.35602e-07	0.000737828	0.00147543	0.000614381	4.57585e-07	0.000752407	0.00222871	0.00189017	0.00165117	0.00112295	0.000479897	8.96414e-05	0.000140773	0.00154177	0.00273392	0.0012342	0.000197972	0.000301747	0.00031967	9.37e-05	0.000278	0.00014	0.000177	0.000184	0.000149	0.000172	0.000108	0.000413	0.000294	4.77e-05	0.00052	9.78e-05	0.000166	0.000210935	8.47198e-05		0.000590617	0.00101806	0.000208171		0.000809886
43	E<->I	2	6.22915e-05	0.000250737	4.47215e-07	0.00037169	5.45162e-07	4.57585e-07	5.33607e-07	4.33552e-07	5.09728e-07	4.21607e-07	0.000187688	5.55732e-05	4.5246e-07	4.6429e-07	0.00292335	0.000567439	0.000235021	7.27e-05	0.000157405	0.000267	5.79e-05	0.000163	6.88e-05	4.27e-05	6.18e-05	9.65e-05	1.3e-05	9.69e-05	0.000276	0.00013	5.63e-05	0.000359	2.66e-05	9.24e-05	5.5024e-05	3.30327e-05		0.000188448	0.000274003	0.000111898		0.000162105
44	G<->I	2	9.95333e-05	0.000129017	4.47215e-07	2.60535e-05	5.45162e-07	4.57585e-07	1.29773e-05	4.33552e-07	4.38111e-05	4.21607e-07	7.52877e-06	5.95066e-07	4.5246e-07	0.00012696	0.00131958	0.000554939	7.54573e-05	7.85e-05	6.29e-06	8.41e-05	1.22e-05	0.000115	3.93e-05	5.38e-05	7.87e-06	3.03e-05	7.11e-05	9.34e-05	4.52e-05	5.13e-06	8.1e-05	0.000105	2.25e-05	5.49e-05	1.24308e-05	2.90594e-05		9.29525e-05	0.00014113	4.98463e-05		9.12837e-05
45	H<->I	2	0.00115706	0.000158402	4.47215e-07	5.09653e-07	5.45162e-07	4.57585e-07	5.33607e-07	0.000475455	0.00100724	0.000952541	0.0010254	0.000329143	4.5246e-07	0.00024632	0.000933504	4.80209e-07	0.000211728	0.000304028	0.000619282	0.000404	0.000173	0.000686	0.000274218	0.000202314	9.67e-05	0.000241	0.000289	0.000255	0.000402	0.00067	0.000159	0.000722	0.000175	0.000253	0.000296387	0.000169026		0.000358088	0.000382366	0.000336366		4.59997e-05
46	A<->L	2	0.00124795	0.00245521	0.000158904	0.000383397	0.0010226	0.000782228	0.0016742	0.00157208	0.00158349	0.00159641	0.00158776	0.000868207	0.000963442	0.00145936	0.000518294	0.000432716	0.00133473	0.00127586	0.0023615	0.00175	0.0011	0.00191581	0.00129468	0.00139	0.00106	0.00147	0.00112	0.00113	0.00188	0.00132	0.00155	0.00222	0.00113	0.00147	0.00144264	0.00150034		0.00133394	0.00115535	0.00149373		-0.000338376
47	R<->L	1	0.000993971	0.00160352	0.000440556	0.00106496	0.00105023	0.000608218	0.00129568	0.000167369	0.0011865	0.000806462	0.00173423	0.00104378	0.000811813	0.000864769	0.00224901	0.00110901	0.000810447	0.00145319	0.00125127	0.00176271	0.00172323	0.00216496	0.00171	0.00161	0.00174	0.00183	0.00192	0.0019	0.00152	0.00187	0.00183	0.00185	0.00182	0.00175	0.00143475	0.00173625		0.0014088	0.00104944	0.00173033		-0.000680892
48	N<->L	2	0.00109451	0.00146557	0.000108991	0.000542261	0.000792425	0.00195922	0.000693129	0.000435638	0.00159742	0.00134961	0.00111478	0.000462503	0.001297	0.00100163	0.00141896	0.0010128	0.0015271	0.000254713	0.000497393	0.0004339	0.000184481	0.000476	0.000238	0.000465	0.00021	0.000299	0.000185	0.000108	0.000409	0.000383	0.000186	0.000511	0.00013	0.000221	0.000236324	0.000196578		0.000652721	0.00105139	0.00029602		0.000755365
49	D<->L	2	0.000407714	7.27716e-05	0.00038774	0.000250938	0.000358068	0.000165568	5.33607e-07	0.00107068	7.46752e-05	4.21607e-07	0.000364625	0.000137407	0.000270436	3.10703e-05	0.00043649	3.16218e-05	5.12374e-07	5.27e-05	7.08e-05	0.000239	4.48e-05	0.000212	4.21e-05	4.96e-05	1.65e-05	6.71e-05	2.13e-05	2.26e-05	9.35e-05	1.73e-05	2.37e-05	0.00014	1.85e-05	3.88e-05	2.59882e-05	1.83729e-05		0.000146554	0.000238898	6.39295e-05		0.000174969
50	C<->L	2	0.00472248	0.00231335	0.000449115	0.00717368	0.00181114	0.00114138	0.00193159	0.00173953	0.00151771	0.00180259	0.00187945	5.95066e-07	0.0042992	0.00220373	0.00443852	4.80209e-07	5.12374e-07	0.00386208	0.00112	0.00291	0.00413	0.00484045	0.00514672	0.00406958	0.00398975	0.00535	0.0111	0.00376432	0.00243	0.00425605	0.00454	0.00331	0.00463	0.00448987	0.00436177	0.00457077		0.00334157	0.00220147	0.00436165		-0.00216018
51	Q<->L	1	0.00988686	0.00615526	0.00657346	0.00368834	0.00636515	0.00614887	0.00595227	0.00825403	0.00420024	0.00602073	0.00522096	0.00424841	0.00563009	0.00632443	0.0059069	0.00532778	0.00293131	0.00257752	0.00284867	0.00326069	0.00220851	0.00320284	0.00257296	0.00220116	0.00312	0.00236	0.00145405	0.00318	0.00281099	0.00315	0.00316	0.00368	0.0027795	0.00245	0.0026069	0.0018712		0.00417584	0.00581383	0.00271026		0.00310356
52	E<->L	2	0.000655042	0.000831276	4.47215e-07	5.09653e-07	0.00020793	0.000618957	0.000338926	0.000265802	0.000647242	0.000335346	0.000206859	0.000702017	0.000379406	0.000682925	0.00102991	0.000153734	0.000652426	0.000141673	0.000507466	0.000481829	0.000182228	0.000427867	0.000218755	0.000177	0.000177	0.000270615	6.03e-05	0.000121983	0.000382	0.000241	0.00017	0.000505815	0.000126	0.0002	0.000159471	0.00012583		0.000344044	0.000453456	0.000246149		0.000207307
53	G<->L	2	5.12055e-07	4.35602e-07	0.000392033	0.000386434	5.45162e-07	0.000334513	5.33607e-07	0.000321124	5.09728e-07	0.000116498	0.000157717	5.46925e-05	4.5246e-07	4.6429e-07	0.000819442	4.80209e-07	5.12374e-07	0.000276849	0.000170897	0.000371976	0.000270133	0.000406852	0.0003	0.000327	0.000118971	0.000300584	0.000264342	0.000257	0.000248	0.000181	0.000321349	0.000401	0.000228	0.000278525	0.000262183	0.000272438		0.000217889	0.000152171	0.000276689		-0.000124519
54	H<->L	1	5.12055e-07	0.00224346	0.0038211	5.09653e-07	0.00200171	0.00280694	0.00152238	0.000387977	0.00142012	0.00324694	0.00108222	0.0036077	0.000291914	0.0018347	0.0024697	0.00100796	0.00258429	0.00167655	0.0022051	0.00195572	0.000740863	0.00232	0.00204	0.00190667	0.00165464	0.00119083	0.00172	0.00137	0.00171	0.00178373	0.00209	0.00234	0.00154201	0.00176	0.00172101	0.00144328		0.0017639	0.00178413	0.00174581		3.83145e-05
55	I<->L	1	0.0235234	0.0209524	0.0241905	0.0228647	0.0234325	0.0215183	0.0217065	0.0190805	0.0241841	0.0258497	0.0280648	0.025137	0.0201395	0.0217425	0.0181707	0.0225645	0.0217579	0.02414	0.0269467	0.0193	0.0246	0.0251	0.0267657	0.0282414	0.0263693	0.0276	0.0286	0.0223	0.0238895	0.0272	0.025	0.0201684	0.0262	0.0281	0.026542	0.0262244		0.0241157	0.02264	0.0254362		-0.00279621
56	A<->K	2	0.0031926	0.00258104	0.00249982	0.000352512	0.00222651	0.00255419	0.00176537	0.00147389	0.00385153	0.00390452	0.00278819	0.0014106	0.00104521	0.00212244	0.00246447	0.00151999	0.00203301	0.00274682	0.00166128	0.00182	0.00292	0.0026262	0.00294309	0.00302802	0.00204	0.00316	0.00224	0.00224874	0.00168	0.00211	0.00211423	0.00267	0.00217	0.00338	0.00369028	0.00217805		0.00236702	0.0022227	0.00249614		-0.000273443
57	R<->K	1	0.0129836	0.0138685	0.0134721	0.00732448	0.0179604	0.00924555	0.015623	0.0128762	0.0150826	0.0146102	0.0135557	0.0225963	0.0141428	0.0167116	0.0170008	0.0140651	0.0161607	0.0249122	0.036703	0.0332032	0.0298794	0.0315118	0.0277172	0.0287	0.0312	0.0265	0.0250222	0.0256	0.027	0.0312011	0.0303	0.0298	0.0249	0.0301	0.0290303	0.0312743		0.0222732	0.0145459	0.0291871		-0.0146412
58	N<->K	1	0.00629235	0.00793958	0.0100787	0.0140783	0.0063583	0.00945666	0.00870879	0.00571435	0.006468	0.00981979	0.0067526	0.0102757	0.0119537	0.0112569	0.00648546	0.0141464	0.00890806	0.0113458	0.00808385	0.0131725	0.00808198	0.00884004	0.00869	0.011	0.0113	0.00795257	0.0167	0.0112	0.00870863	0.00637	0.0096	0.0105	0.012	0.00944497	0.00898915	0.00907086		0.009604	0.00909962	0.0100553		-0.000955659
59	D<->K	2	0.00272823	0.000127257	8.49261e-06	0.00142265	0.000223451	0.000157949	0.000629325	0.000204229	0.00039011	0.000274091	0.000320245	0.000426383	0.00080618	0.000605435	0.00529554	0.000322782	0.000487037	0.000794642	0.00056729	0.00156842	0.000648765	0.000865	0.000782	0.000814	0.000750023	0.000848	0.000499	0.000476253	0.000975	0.000473	0.000633	0.00139	0.000703492	0.000737	0.00115713	0.000488963		0.000822232	0.000848787	0.000798473		5.03141e-05
60	C<->K	3	0.0018673	0.000830706	0.000409845	0.00212699	0.000585286	4.57585e-07	0.000217327	0.00137343	0.000478232	4.21607e-07	4.50555e-07	5.95066e-07	4.5246e-07	0.000263369	0.00184653	4.80209e-07	3.99395e-05	1.14e-05	0.000156107	0.000250021	3.82e-05	3.7e-05	3.44e-05	0.000177034	3.55e-05	1.38e-05	0.000733725	1.35e-05	3.08e-05	9.85e-05	3.19e-05	0.000127192	3.44e-05	7.78e-05	8.96637e-05	6.79628e-06		0.000334432	0.000590695	0.000105144		0.000485551
61	Q<->K	1	0.0126971	0.0146834	0.0138743	0.0166006	0.0164596	0.0143217	0.0135825	0.0103818	0.0109092	0.0128404	0.0108039	0.0105428	0.0186765	0.0120522	0.00842272	0.0208342	0.00977031	0.0130163	0.0112973	0.016398	0.0163451	0.0130743	0.0142285	0.0159842	0.0148368	0.0147825	0.0325648	0.0138482	0.0113206	0.0117882	0.0140037	0.0153772	0.0162622	0.0145436	0.0150738	0.0158502		0.0143902	0.0133796	0.0152945		-0.0019149
62	E<->K	1	0.00415342	0.00208515	0.00246219	0.00472186	0.00257992	0.00244006	0.00267685	0.00193851	0.00233469	0.00111048	0.0028273	0.0033442	0.0012557	0.00269391	0.00637035	0.00177612	0.00384728	0.00337293	0.00629278	0.00997059	0.00511217	0.00600754	0.00396946	0.00367375	0.00623965	0.005929	0.00907817	0.00374786	0.00658155	0.00287361	0.00203691	0.0092809	0.00408456	0.00429115	0.00485934	0.00525767		0.00420216	0.00285988	0.00540314		-0.00254325
63	G<->K	2	0.000806477	0.00070561	0.000626959	0.000501769	0.000899484	0.000158082	0.000700199	0.000111002	0.000991487	0.000586228	0.000614386	0.000788516	0.000505059	0.00103088	0.00155798	0.000186758	0.000933253	0.00172336	0.0019058	0.00187937	0.00164058	0.0015977	0.00162516	0.00148703	0.00195857	0.00121425	0.000874313	0.00126749	0.00180394	0.000903486	0.00155057	0.00157535	0.00159819	0.0016437	0.00215191	0.0012974		0.00115006	0.000688478	0.00156306		-0.000874584
64	H<->K	2	0.00210041	0.00515935	0.00359377	0.00334617	0.00481052	0.00119646	0.00291077	0.00495767	0.00404401	0.00610733	0.00176037	0.00241399	0.00297185	0.00296814	0.00593902	0.00249868	0.00402663	0.00243158	0.00238845	0.0032839	0.00490548	0.00192979	0.00281584	0.00295875	0.00279121	0.00545673	0.00206353	0.00277515	0.00264532	0.00223492	0.0014188	0.00334364	0.0019269	0.0031295	0.00294159	0.00284938		0.0031971	0.00357677	0.00285739		0.000719381
65	I<->K	1	0.000973622	0.00121643	0.000105914	0.00072227	0.000464827	0.000118382	0.000315271	0.000513591	0.00066203	0.000719611	0.000246008	0.000490424	0.00013853	0.000332446	0.00120583	0.000568217	0.000337485	0.000263618	0.0005533	0.000902184	0.000319022	0.000454775	0.000422636	0.000408718	0.000441979	0.000463714	0.000484052	0.000456266	0.00070639	0.000466489	0.000178115	0.00110494	0.000262582	0.000515	0.000210983	0.000409923		0.000504321	0.000537111	0.000474983		6.21278e-05
66	L<->K	2	0.000633545	0.00110967	0.000565592	0.000510846	0.000532105	0.00066397	0.000426752	0.000796375	0.00054624	0.000574625	0.00102519	0.000354368	0.000977631	0.00146619	0.00220768	0.00073338	0.000447933	0.000407421	0.000788923	0.000796057	0.000512135	0.000610778	0.000720166	0.000736198	0.00040399	0.0010198	0.000573812	0.000324416	0.00068135	0.000751628	0.000485309	0.000905413	0.000296	0.000747081	0.000478131	0.000614486		0.000706255	0.000798359	0.000623847		0.000174512
67	A<->M	2	0.00646045	0.00263556	0.00248626	0.00156313	0.00443255	0.0020983	0.00304384	0.000941169	0.00324171	0.00325604	0.00264672	0.00339941	0.00279454	0.00333849	0.00303371	0.00248539	0.0049042	0.00336082	0.00756985	0.00391037	0.00341101	0.00426981	0.00314843	0.00304866	0.00360328	0.00401864	0.00303289	0.00311449	0.00612295	0.00388989	0.00241722	0.00562	0.00298665	0.00362	0.00357253	0.00467451		0.00355982	0.00310362	0.003968		-0.000864385
68	R<->M	1	0.00199011	0.000849964	4.47215e-07	5.09653e-07	0.00099987	0.000643291	0.00191297	0.00235664	0.00104667	0.00103468	0.00137262	0.00338036	0.000497213	0.00152435	0.00220084	0.000464732	0.00268622	0.00134712	0.00272391	0.00311471	0.00178702	0.00243708	0.00149969	0.0012153	0.00278991	0.0022687	0.00140528	0.00120277	0.00352238	0.00204156	0.000878	0.00290965	0.00123	0.00132	0.00143447	0.00214552		0.00167318	0.00135068	0.00196174		-0.000611065
69	N<->M	2	0.00208941	0.000990519	0.00482708	0.00121056	0.000682848	0.000581906	0.0017681	4.33552e-07	0.00365014	0.00293479	0.00131849	0.000963025	0.00288896	0.00251837	0.00118895	0.00223532	0.000617006	0.0028847	0.0022374	0.00181403	0.00141339	0.00215024	0.0015698	0.00276532	0.0012664	0.00151773	0.00166075	0.00106742	0.00172991	0.00194	0.00171227	0.00227	0.00183	0.00151	0.00236587	0.0015183		0.00182471	0.00179211	0.00185387		-6.17592e-05
70	D<->M	3	0.000251972	4.35602e-07	0.000187486	5.09653e-07	0.000913702	4.57585e-07	0.000655893	0.00104046	5.09728e-07	0.000831324	4.50555e-07	5.95066e-07	4.5246e-07	9.83367e-06	0.00120408	0.000366678	0.00035259	0.000176398	0.000221559	0.000275308	0.000209876	0.000462611	0.000143584	0.000144736	0.000232478	0.000132399	0.000285602	0.000117495	0.000139	0.000168733	0.000259	0.000287	8.1e-05	5.88e-05	0.000128392	0.000106657		0.000262446	0.000342202	0.000191086		0.000151116
71	C<->M	3	0.00323004	4.35602e-07	0.00299349	5.09653e-07	5.45162e-07	4.57585e-07	0.00100873	4.33552e-07	0.00140105	4.21607e-07	0.0104829	0.00188398	4.5246e-07	0.00322692	0.00413497	4.80209e-07	0.0032268	0.0047316	0.00161944	0.00434921	0.00484703	0.00415699	0.00453432	0.00615651	0.00301878	0.00667083	0.00172495	0.00261	0.00423745	0.000149	0.00315	0.00438751	0.00242	0.00491	0.00582258	0.00415662		0.00292348	0.00185839	0.00387646		-0.00201807
72	Q<->M	2	0.00856508	0.00558909	0.0171282	0.00239321	0.00884166	0.0135446	0.0127026	0.0129761	0.0111176	0.017181	0.0105205	0.0119735	0.0120295	0.00889136	0.01003	0.0127323	0.0115055	0.00597443	0.0117	0.00559508	0.00513721	0.00611164	0.00540478	0.00775268	0.00827778	0.00541051	0.00607	0.00321316	0.0101	0.00533	0.00383678	0.00889	0.00463	0.00507	0.008117	0.00456111		0.00858067	0.0110425	0.00637801		0.00466446
73	E<->M	2	0.000959218	0.00167273	0.000232198	0.00543161	5.45162e-07	0.00218166	0.000830442	4.33552e-07	6.94148e-05	0.000438711	0.0007046	0.000593644	0.00196776	0.00111578	0.00142432	0.0010369	0.00168067	0.00037926	0.00143542	0.000899271	0.000747041	0.000798306	0.000340355	0.00029252	0.00069501	0.000738	0.000160567	0.000354	0.00105	0.000729329	0.00025	0.00112	0.00026	0.000304	0.000404526	0.000457123		0.000882094	0.00119651	0.000600775		0.000595733
74	G<->M	2	0.000322451	0.000269664	0.000460779	5.09653e-07	0.000153703	0.000355589	0.000422211	4.33552e-07	0.000570432	4.21607e-07	0.000224633	1.99942e-06	4.5246e-07	0.000156197	9.61951e-05	4.80209e-07	0.000449998	0.00061801	0.000921	0.00104188	0.000958873	0.00134069	0.000461531	0.000781327	0.000835	0.000680907	0.000798	0.000647	0.00103195	0.00168	0.000479	0.00099	0.000943	0.000556	0.000790181	0.000637479		0.00054661	0.000205068	0.000852201		-0.000647134
75	H<->M	3	0.00221362	0.00176218	0.00271768	0.000956624	0.00114158	4.57585e-07	0.00285939	4.33552e-07	0.00373737	0.00134259	0.000660856	0.00130555	0.000930738	0.00113716	0.00510339	4.80209e-07	0.000812005	0.00157675	0.00328	0.00219635	0.000764329	0.00145631	0.00182447	0.00188	0.0013513	0.00122	0.00135	0.000839745	0.00178	0.000909	0.00136	0.00238	0.00135	0.00146	0.00218751	0.000914607		0.00157674	0.00156954	0.00158318		-1.36421e-05
76	I<->M	1	0.00639333	0.0106556	0.0124146	0.02504	0.012244	0.0111445	0.01276	0.00251482	0.00952277	0.0124935	0.0109322	0.0191652	0.00718681	0.0114241	0.0150032	0.00930667	0.0137365	0.0233233	0.0147363	0.0195199	0.0181915	0.0227042	0.0194	0.021509	0.0185	0.0191	0.0194444	0.0247	0.0201	0.0193	0.0224	0.0217	0.0219	0.0208	0.0192887	0.0217204		0.0163966	0.0118787	0.0204388		-0.00856012
77	L<->M	1	0.0283503	0.023621	0.0359088	0.0241076	0.0285305	0.0306341	0.0273112	0.0422109	0.0320633	0.0385009	0.0352185	0.0298623	0.0353731	0.0293333	0.0349841	0.025823	0.0295809	0.0375268	0.0323725	0.0319416	0.0388582	0.0348	0.041717	0.0387	0.0365	0.0369806	0.0296	0.0404	0.0353	0.045	0.0389	0.0314	0.0375	0.041	0.036891	0.0372859		0.0342802	0.0312596	0.0369828		-0.00572319
78	K<->M	1	0.00198351	0.00161908	0.00147696	0.00215494	0.00189663	0.000810937	0.00308336	0.00240501	0.00216003	0.00312872	0.000702762	0.00257221	0.0017015	0.00138009	0.00140847	0.00120889	0.00202741	0.00255045	0.00318654	0.00278	0.00243	0.00261648	0.00241	0.0023	0.00385687	0.00251	0.00619	0.00228	0.00311	0.00241	0.00198	0.00397	0.00306	0.00277	0.00227637	0.00324785		0.00243486	0.00186591	0.00294392		-0.00107801
79	A<->F	2	0.00138735	4.35602e-07	0.000134831	0.00120458	0.00102012	0.00048488	0.000335463	0.000143116	0.00114222	5.95267e-05	0.000617603	0.000850207	0.000513972	0.000673565	0.000999818	0.000516964	0.000797638	0.000724646	0.00162142	0.000927447	0.00107032	0.00112	0.00103	0.000813614	0.00109	0.00113	0.000906	0.000923	0.00138	0.001	0.000609	0.00143	0.000577	0.00108	0.000916543	0.00140732		0.000851072	0.000640135	0.00103981		-0.000399671
80	R<->F	2	0.00064287	4.35602e-07	0.000725852	4.85903e-05	9.69025e-05	4.57585e-07	0.000373888	4.33552e-07	0.000189818	0.00133216	7.74549e-05	5.76619e-06	4.5246e-07	0.000105742	0.000410705	4.80209e-07	0.000274694	0.00011515	9.01e-05	0.000499	0.000128	0.000354	0.000220163	7.24e-05	8.44e-05	0.000317	0.000159	0.000174	0.000372	0.000249	0.000138	0.000349	7.31e-05	0.000285	0.000134347	0.000112186		0.000228126	0.000252159	0.000206623		4.55352e-05
81	N<->F	2	0.000449538	4.35602e-07	4.47215e-07	0.00167341	5.45162e-07	4.57585e-07	5.33607e-07	0.000579573	5.09728e-07	4.21607e-07	4.50555e-07	0.000524741	0.00249321	0.00121673	0.0002238	0.00192468	0.000970216	0.000314085	0.000401337	0.000602	0.000394	0.000435643	0.000403894	0.000651	0.00017	0.000451	8.79e-05	0.000161	0.000439	0.000515	0.000408	0.000595	0.000212	0.000305	0.000628291	0.000101046		0.000481525	0.000591747	0.000382905		0.000208842
82	D<->F	2	5.12055e-07	4.35602e-07	4.47215e-07	0.000171422	5.45162e-07	4.57585e-07	0.000181384	4.33552e-07	5.09728e-07	0.000103728	4.50555e-07	5.95066e-07	4.5246e-07	4.6429e-07	0.000876471	4.80209e-07	5.12374e-07	9.62e-05	0.00017487	0.00014661	0.000113805	0.000318241	9.54e-05	5.65e-05	2.01e-05	0.000102	9.16e-05	5.39e-05	0.000122	2.58e-05	8.25e-05	0.000188	4.62e-05	3.69e-05	5.33619e-05	1.74806e-05		8.83547e-05	7.87824e-05	9.69194e-05		-1.8137e-05
83	C<->F	1	0.0063058	0.00499257	0.010957	5.09653e-07	0.00971518	0.00369316	0.00923431	4.33552e-07	0.0123175	4.21607e-07	0.00936991	0.00493251	0.00567621	0.000121644	0.0010424	4.80209e-07	0.00726006	0.00994408	0.00216627	0.0038148	0.0111459	0.00963	0.0086	0.00803	0.00976	0.00763	0.00804	0.0139	0.00443	0.00815	0.00961	0.00653	0.0105	0.00944	0.00657561	0.0088214		0.00673161	0.00503647	0.00824832		-0.00321184
84	Q<->F	3	5.12055e-07	0.000758008	0.000326748	0.000487172	0.00207137	4.57585e-07	0.0015039	4.33552e-07	5.09728e-07	0.000254663	0.000389757	0.000427888	0.000635978	0.00204724	0.000649129	0.000706676	0.000712482	7.31e-05	0.000130471	0.000193595	4.17e-05	0.000194	0.00011	0.000164	0.000106	0.000123	0.000191	4.12e-05	0.000246	0.000288	3.2e-05	0.000265	5.43e-05	5.6e-05	0.00010496	4.57893e-05		0.00037314	0.000645466	0.00012948		0.000515987
85	E<->F	3	5.12055e-07	0.00038485	4.47215e-07	5.09653e-07	5.45162e-07	0.000190227	0.000379827	4.33552e-07	5.09728e-07	4.21607e-07	4.50555e-07	0.000265233	4.5246e-07	8.25137e-05	0.0020011	4.80209e-07	5.12374e-07	3.36e-05	0.000161065	0.000174835	3.1e-05	0.00013	5.28e-05	3.41e-05	2.1e-05	5.34e-05	4.98e-05	1.77e-05	0.000166	0.000204	2.11e-05	0.000164	2.01e-05	3.77e-05	5.51925e-05	4.41616e-05		0.000132794	0.000194649	7.74502e-05		0.000117198
86	G<->F	2	5.12055e-07	4.35602e-07	1.90379e-05	5.09653e-07	0.000487827	0.000135061	5.33607e-07	4.33552e-07	5.09728e-07	8.32294e-05	4.24423e-05	0.000177824	4.5246e-07	6.41696e-05	0.00125051	7.12582e-05	5.12374e-07	0.000704579	0.000512	0.000575	0.000754	0.000854512	0.000433935	0.000800544	0.000375	0.000588094	0.000599	0.000391	0.00064	0.00106	0.000626	0.000732	0.000566935	0.000708048	0.000692101	0.000702829		0.000406968	0.000137368	0.000648188		-0.00051082
87	H<->F	2	0.00568725	0.0056485	0.00499527	0.00336309	0.0072558	0.0151146	0.0103368	0.00818614	0.012152	0.011533	0.00909322	0.00371553	0.00353427	0.00761957	0.0036073	0.00742768	0.00711847	0.00414892	0.00233296	0.00441268	0.00150409	0.00269372	0.00375023	0.00505	0.00150402	0.00246	0.00197	0.00173	0.00439	0.00575	0.00438	0.0037867	0.00274464	0.00434823	0.00468151	0.00150321		0.0052647	0.00743461	0.00332321		0.00411141
88	I<->F	1	0.00448125	0.00484238	0.00591878	0.00506402	0.00296573	0.00219564	0.00397916	0.00037498	0.00538735	0.00108722	0.00177206	0.00342448	0.00382985	0.00504218	0.0041285	0.00859175	0.00410562	0.00538363	0.00531396	0.00456106	0.00424782	0.00569818	0.00507	0.0056606	0.00528	0.00545	0.00479	0.00639	0.00565	0.00454	0.0043084	0.00584098	0.00402284	0.0061814	0.00503824	0.00549709		0.00461431	0.00395241	0.00520654		-0.00125413
89	L<->F	1	0.00639099	0.0121189	0.00677339	0.012084	0.00933037	0.00849256	0.0104464	0.0115328	0.00551772	0.00682616	0.0110485	0.0152928	0.0146425	0.0150443	0.00898947	0.009455	0.0132139	0.0140917	0.0164603	0.0139595	0.018016	0.0176	0.0156479	0.0152	0.0198	0.0173	0.0184	0.0173	0.0176	0.0141593	0.0149486	0.0136648	0.016003	0.0162	0.014951	0.018432		0.0135259	0.0104235	0.0163018		-0.00587827
90	K<->F	3	7.65574e-05	4.35602e-07	0.000175237	5.09653e-07	5.45162e-07	0.000480254	9.20845e-05	0.000552537	0.0005541	0.000505802	0.000366648	5.95066e-07	0.000268363	9.86339e-05	0.000857628	4.80209e-07	2.42302e-05	4.49e-05	5.03e-05	0.00015	3.77e-05	0.000165589	5.75e-05	1.63e-05	4.75e-05	5.95e-05	1.63e-05	6.36e-05	0.00016026	0.000120503	0.000113817	0.000260985	4.97e-05	6.91e-05	1.82473e-05	1.45681e-05		0.00015475	0.000238508	7.98089e-05		0.000158699
91	M<->F	2	0.00734328	0.00542494	0.0038532	0.00446354	0.00138903	0.00275663	0.00741712	0.0106227	0.00545927	0.00695761	0.00432051	0.0045814	0.00240813	0.00934529	0.00552194	0.00500008	0.00681761	0.00824635	0.0105718	0.00647182	0.00747296	0.00743	0.00906826	0.0106664	0.00651503	0.0101	0.00595498	0.00491114	0.00883668	0.00890235	0.00689448	0.00853764	0.00656	0.00958565	0.00958127	0.00849608		0.00690237	0.00551072	0.00814752		-0.0026368
92	A<->P	1	0.00961056	0.00964133	0.00524238	0.00348998	0.00823889	0.00805226	0.00797867	0.0101097	0.00714628	0.00847588	0.00711528	0.006456	0.00793479	0.00652783	0.00997779	0.00674145	0.00821863	0.00558899	0.00433238	0.00683	0.00649	0.00635995	0.00652238	0.00439742	0.00568	0.00675427	0.00511463	0.00751747	0.00636337	0.00859681	0.00651888	0.00655	0.00573734	0.00734067	0.00497533	0.00671771		0.00692626	0.00770339	0.00623093		0.00147247
93	R<->P	1	0.000564823	0.000364002	0.000399139	5.09653e-07	0.00032575	4.57585e-07	0.00106852	0.000374537	0.000563377	0.000189306	0.000338655	0.000465615	0.00031284	0.000650025	0.00122363	4.80209e-07	0.00113141	0.0012605	0.00125709	0.00172073	0.000688025	0.00208657	0.0010684	0.00146	0.00132467	0.000953084	0.00145238	0.00123636	0.0013468	0.00128575	0.00134	0.00183931	0.00137707	0.00112	0.00132535	0.00153518		0.000934731	0.000469004	0.00135143		-0.00088243
94	N<->P	2	0.000529352	4.35602e-07	0.00149036	5.09653e-07	3.68366e-05	0.000498351	0.00157912	4.33552e-07	0.00128179	0.0014857	0.00121911	0.0011228	4.5246e-07	0.00105367	0.00213894	0.000773526	0.00162766	0.000594029	0.00132965	0.000809836	0.000480514	0.000759603	0.000714	0.000625022	0.000301306	0.000664124	0.000339703	0.000476418	0.00077764	0.000673	0.000613799	0.00087034	0.000377	0.00078313	0.00058991	0.000612938		0.000756417	0.000872885	0.000652209		0.000220676
95	D<->P	2	0.0026749	0.00110915	0.000844203	5.09653e-07	0.00247285	0.000404144	0.00122069	4.33552e-07	0.00132337	0.00272087	0.00027592	0.000631972	0.000488336	0.000476891	0.00185272	0.000776229	0.0027358	0.00170858	0.00199831	0.00219612	0.00212834	0.00144	0.00198095	0.00207113	0.00166942	0.00250164	0.00159451	0.00118171	0.00171	0.00217517	0.00164832	0.00206	0.00160065	0.00231	0.00221052	0.00196361		0.00155994	0.001177	0.00190258		-0.000725578
96	C<->P	2	0.0055619	4.35602e-07	4.47215e-07	5.09653e-07	5.45162e-07	4.57585e-07	0.00187393	4.33552e-07	5.09728e-07	4.21607e-07	0.00113627	5.95066e-07	0.00143293	4.6429e-07	0.0005352	4.80209e-07	0.00100848	8.6e-06	0.00125013	0.000339	0.000338	0.000314269	0.000154135	0.000116615	0.000406967	0.000472626	0.000761308	1.57e-05	0.00054053	0.000391111	6.14e-05	0.000502379	0.000147	6.68e-05	0.000222469	0.000140268		0.000494536	0.000679647	0.000328911		0.000350737
97	Q<->P	1	0.00282604	0.00374901	0.00100719	0.00396021	0.0018836	0.00189421	0.0021496	0.00105272	0.00413096	0.00114925	0.00257604	0.00308012	0.00456805	0.0040871	0.00806788	0.00610961	0.00398528	0.00177568	0.00655939	0.00603523	0.0028083	0.00494516	0.00154622	0.00200137	0.00405597	0.00184816	0.0029223	0.00237512	0.00369796	0.00266056	0.00172778	0.00401	0.00181134	0.00163	0.00186391	0.00208344		0.00312874	0.0033104	0.00296621		0.000344198
98	E<->P	2	0.00177113	0.000308423	0.000482428	0.0010609	0.00206555	0.00150449	0.00192306	0.0032283	0.00297932	0.00288794	0.0026311	0.000948987	0.000910504	0.00237263	0.00290706	0.0013446	0.000470426	0.00143797	0.00192053	0.00236435	0.00231878	0.00157316	0.00196833	0.00205145	0.00189686	0.00224291	0.00113841	0.0016221	0.00189524	0.00194439	0.00147	0.00208103	0.00134	0.00219	0.00197726	0.0021842		0.00181705	0.00175275	0.00187458		-0.000121822
99	G<->P	2	0.000466324	0.000626835	0.00028586	5.09653e-07	0.000370465	4.57585e-07	0.000515005	0.000336866	0.000479374	0.00101169	0.000944827	0.000386638	0.000178749	0.000397344	0.000734079	6.04151e-05	0.000704724	0.00111669	0.00140053	0.00103795	0.000727542	0.00164132	0.000911136	0.00157378	0.00100988	0.000856647	0.000984565	0.000489488	0.00079925	0.00144	0.00107966	0.00118	0.00103	0.00105216	0.00138793	0.000670081		0.000774688	0.000441186	0.00107309		-0.000631899
100	H<->P	1	0.00148441	0.00151822	0.00178959	0.000394686	0.0026853	0.00231425	0.00230067	0.00108348	0.000784619	0.000472499	0.00223672	0.00150872	4.5246e-07	0.00120516	0.00478762	4.80209e-07	0.00123282	0.00152101	0.00215104	0.00564794	0.001891	0.00339812	0.0013805	0.0014608	0.00273159	0.00162209	0.00203447	0.00177498	0.00337	0.00274373	0.00191	0.00308	0.0016962	0.00159	0.00132986	0.00188609		0.0019172	0.00151763	0.00227471		-0.000757077
101	I<->P	2	0.000331095	0.000529047	4.47215e-07	5.09653e-07	5.45162e-07	4.57585e-07	0.000658994	0.00091555	0.000456456	0.000322761	0.000395443	0.000514405	0.000124608	0.000363614	0.0029441	0.000589236	0.00024679	0.000171825	0.000310556	0.000486381	0.00013549	0.000323288	0.000207353	0.000145874	0.00014737	0.000270171	0.000106196	9.91e-05	0.00039322	8.95e-05	9.46e-05	0.000485236	8.82e-05	0.000224379	0.00013373	0.000184706		0.000346979	0.000493768	0.000215641		0.000278127
102	L<->P	1	0.00103854	0.000911187	0.00013458	0.00199781	0.000728559	0.000165568	0.000680183	4.33552e-07	0.000471509	0.00093517	0.000757847	0.00157312	0.000404264	0.000738779	0.00211006	0.00129461	0.00165285	0.000929249	0.00136266	0.00233471	0.00115215	0.00171941	0.000853121	0.000667153	0.00120002	0.000776769	0.00123632	0.00122176	0.00143645	0.00100314	0.000992404	0.00199217	0.00120493	0.000699	0.000869073	0.000870482		0.00105878	0.000917357	0.00118531		-0.000267957
103	K<->P	2	0.000568248	0.000686752	8.48948e-05	0.000488136	0.000554664	0.000567978	0.000941955	0.000357598	0.000591677	0.00091283	0.000303246	0.000667896	0.000323848	0.000885458	0.00293138	0.0014506	0.00178157	0.00168877	0.00204492	0.00217969	0.0022497	0.00155441	0.00174649	0.00174753	0.00150193	0.00223175	0.000873666	0.00150837	0.00182664	0.00177891	0.00148525	0.00195217	0.00115	0.00194899	0.00210458	0.00179526		0.00131855	0.000829336	0.00175626		-0.000926928
104	M<->P	2	5.12055e-07	4.35602e-07	0.00147005	0.000415984	5.45162e-07	0.000256778	0.000294375	4.33552e-07	5.09728e-07	4.21607e-07	4.50555e-07	5.95066e-07	4.5246e-07	4.6429e-07	0.000176914	4.80209e-07	0.00144961	0.00118092	0.00106539	0.000556628	0.000509873	0.00103089	0.000609195	0.000956934	0.000768634	0.000510211	0.000885752	0.000380148	0.00063425	0.00090357	0.000928577	0.000719	0.000757693	0.000668	0.000821568	0.000568823		0.000514585	0.000239354	0.000760845		-0.000521491
105	F<->P	2	0.00120007	0.00064148	0.000332835	0.000967118	5.45162e-07	0.000606849	0.00016378	4.33552e-07	5.63402e-05	4.21607e-07	4.50555e-07	5.95066e-07	4.5246e-07	0.000444693	0.00173362	4.80209e-07	0.000233473	0.000334443	0.000964007	0.00062783	0.000305616	0.00052908	0.00035861	0.000262725	0.000365952	0.00054534	0.000327359	0.000312681	0.00060164	0.000310748	0.000244	0.000629046	0.000296	0.000387	0.000333039	0.000363622		0.000402288	0.000375508	0.000426249		-5.0741e-05
106	A<->S	1	0.0349624	0.0425987	0.0277983	0.0361427	0.0392791	0.0356405	0.0383019	0.0443026	0.0332549	0.0377709	0.0398366	0.0440225	0.0386458	0.0395228	0.0284555	0.043566	0.0340289	0.0174522	0.0284473	0.0232221	0.0260477	0.0180187	0.0231155	0.0182987	0.0263555	0.0297149	0.0181004	0.0207595	0.0282057	0.0343	0.0171238	0.0225	0.021	0.0234	0.0199656	0.0319071		0.0301685	0.0375371	0.0235755		0.0139616
107	R<->S	1	0.00287267	0.0017197	0.00301341	0.00185734	0.00753919	0.00485184	0.00376007	0.00553774	0.00285036	0.00222715	0.0026349	0.00494613	0.000277625	0.00311216	0.00342295	0.00265771	0.00383023	0.00333105	0.00449285	0.0037685	0.00339731	0.00341348	0.00363105	0.00324166	0.00392489	0.00314525	0.00408041	0.00446127	0.00361	0.00345452	0.00385	0.00432	0.0039	0.00352	0.00319577	0.00379199		0.00354559	0.00335948	0.00371211		-0.000352624
108	N<->S	1	0.0322737	0.0298146	0.0407785	0.0365763	0.036153	0.0385008	0.0242531	0.0310389	0.0215394	0.0240688	0.0304044	0.0292062	0.0273869	0.0255543	0.0223712	0.0332527	0.0245093	0.0256815	0.0219349	0.0167216	0.0216279	0.0172121	0.0201745	0.0206263	0.017761	0.0172886	0.0188642	0.0226	0.0170978	0.0172	0.0235	0.0189	0.0235	0.0202	0.0216578	0.0178931		0.0246701	0.0298637	0.0200232		0.00984042
109	D<->S	2	0.00656749	0.00908947	0.00301907	0.00361078	0.00800794	0.00490717	0.00829074	0.00306765	0.0058707	0.00661738	0.00587382	0.00570296	0.00723933	0.0094376	0.0072175	0.00374672	0.00297441	0.00473556	0.00680626	0.00492266	0.00539744	0.0041277	0.00586224	0.00562859	0.00520126	0.00578989	0.00575	0.00386237	0.00549	0.00513	0.00417	0.00583	0.00485	0.00584389	0.00589934	0.0052253		0.00560453	0.00595534	0.00529066		0.000664679
110	C<->S	1	0.0160436	0.0120442	0.025807	0.0507081	0.0168181	0.0263236	0.0210059	0.0249885	0.00903614	0.00403907	0.00448492	0.0182507	0.0203539	0.0146765	0.0101453	4.80209e-07	0.0222928	0.0150275	0.00837499	0.0130943	0.018866	0.0130844	0.0171283	0.0146037	0.0184317	0.0177	0.0108395	0.0235	0.0148	0.0213	0.0174	0.0134	0.0180678	0.0156852	0.0143066	0.0194364		0.016724	0.0174717	0.0160551		0.00141661
111	Q<->S	2	0.0128695	0.0024284	0.00697429	0.00237262	0.00354477	0.00314909	0.0103451	0.00457128	0.0124662	0.01176	0.00913216	0.00738711	0.00557144	0.00959136	0.00497854	0.0140466	0.0060022	0.00465514	0.0102452	0.00480301	0.00454243	0.00452253	0.00501982	0.00583435	0.00531	0.00547561	0.0044	0.00308	0.0059	0.00502	0.00389	0.00589546	0.00378772	0.00494	0.00607964	0.00558772		0.00628276	0.00748181	0.00520993		0.00227188
112	E<->S	2	0.00365506	0.00456575	0.0051934	0.00192796	0.00435992	0.00461946	0.00494586	0.00135666	0.00369378	0.00288021	0.00330386	0.00351919	0.000998331	0.00331112	0.00432597	0.00188298	0.00288337	0.00147138	0.00436325	0.00276113	0.00197423	0.0019031	0.00228732	0.00201	0.00247682	0.00265	0.00263	0.00163	0.00277	0.00193	0.00125821	0.00290707	0.00174	0.00247	0.00190915	0.00252774		0.00280812	0.00337782	0.00229839		0.00107943
113	G<->S	1	0.00603586	0.00670703	0.00966472	0.00422748	0.00751647	0.00808589	0.00645878	0.00414177	0.00613104	0.00604408	0.00787359	0.00571216	0.00524473	0.00600307	0.00681933	0.00549512	0.00847223	0.0111528	0.0107951	0.00785186	0.0109901	0.00921214	0.00946	0.00869173	0.00877	0.00839	0.01	0.0127	0.00923	0.0100706	0.0115005	0.009	0.0102	0.00952073	0.0102764	0.00884704		0.00825812	0.00650784	0.00982416		-0.00331632
114	H<->S	2	0.00651034	0.0055718	0.00664504	0.00614472	0.00469182	0.00650108	0.00766586	0.00259149	0.00487915	0.00742368	0.00807987	0.00603005	0.00764834	0.00689523	0.00397407	0.0135611	0.00750026	0.00423789	0.00663546	0.00400354	0.004019	0.00377	0.00465025	0.00462	0.00445	0.00388	0.00331	0.00385	0.00479696	0.00463625	0.00483	0.00477	0.00394799	0.00414689	0.00421938	0.00495179		0.00544554	0.0066067	0.0044066		0.0022001
115	I<->S	1	5.12055e-07	4.35602e-07	0.00079144	9.86332e-05	0.000307389	0.0002943	5.33607e-07	4.33552e-07	0.000279744	0.00142574	0.000769827	0.000657798	4.5246e-07	0.000141158	0.00119471	4.80209e-07	0.000194277	0.000171596	4.13e-05	0.000369	0.000109	0.000285212	6.36e-05	6.64e-05	7.8e-05	5.81e-05	7.7e-05	0.000192926	0.00026722	8.83e-05	8.9e-05	0.000465954	0.000102672	0.000131343	5.6429e-05	5.14465e-05		0.000247844	0.000362228	0.0001455		0.000216728
116	L<->S	1	0.000374425	0.0023869	0.00108012	0.00221961	0.000447163	0.0011433	0.000277187	0.00101211	2.76986e-05	0.000787127	0.000664488	0.00139711	4.5246e-07	0.000909972	0.00212749	0.000318989	0.000637562	0.000459562	0.000392793	0.00173055	0.000393549	0.00122987	0.00023783	0.000262831	0.000433147	0.000467	0.00024671	0.000608056	0.00116199	0.000650047	0.000349541	0.00141811	0.000303169	0.000381371	0.00021746	0.000363032		0.000753287	0.0009301	0.000595085		0.000335015
117	K<->S	2	0.00308685	0.00449133	0.00478781	0.00363382	0.0060075	0.00573417	0.00445181	0.000559304	0.00488384	0.00654628	0.00636852	0.00276787	0.00355588	0.00380056	0.00560354	0.00468837	0.00299008	0.00315839	0.00447624	0.00344645	0.00256096	0.00255199	0.00354618	0.00325218	0.00345	0.0031186	0.00297865	0.00258029	0.00312177	0.00252387	0.00212969	0.00356272	0.00296911	0.00353877	0.00335672	0.00311583		0.00370544	0.00435044	0.00312834		0.0012221
118	M<->S	2	0.00283486	0.00120566	0.00132612	0.00172647	0.00142984	0.00102872	0.00397098	0.00607283	0.00274982	0.00410281	0.000791039	0.00527038	0.00102512	0.00185951	0.00179713	0.00176391	0.00285271	0.00299951	0.00252047	0.00141785	0.00128085	0.00167922	0.00179388	0.00184	0.00129988	0.00207691	0.00181739	0.00174244	0.00206592	0.00241799	0.00264923	0.00204685	0.00170949	0.00186969	0.00181715	0.00195596		0.00218913	0.00245929	0.0019474		0.000511885
119	F<->S	1	0.000169572	0.00293962	0.000689086	0.00442948	0.00123452	0.00102716	0.00162221	0.00123159	0.00119422	0.000994874	0.0015882	0.00427089	0.00165524	0.00146642	0.00156523	0.00255104	0.00327945	0.00115997	0.000970082	0.00238679	0.00144438	0.00201122	0.00087	0.00085234	0.00178237	0.000963802	0.00103752	0.00137467	0.00237512	0.00111769	0.00110563	0.00261516	0.000892715	0.000680944	0.000832467	0.00114208		0.00159788	0.00187699	0.00134815		0.000528833
120	P<->S	1	0.00562989	0.00931837	0.00539235	0.00908026	0.00641214	0.0053707	0.00495751	0.00295171	0.00101859	0.00477247	0.00442935	0.00569858	0.00381397	0.0055098	0.00585454	0.00338474	0.00609684	0.00505955	0.0056965	0.0109934	0.00740924	0.00675	0.0054927	0.00431197	0.00727989	0.00662808	0.00892605	0.00676306	0.00741734	0.00620877	0.00483074	0.00750846	0.00651606	0.0050877	0.00483033	0.00785374		0.00597932	0.00527599	0.00660861		-0.00133262
121	A<->T	1	0.00725773	0.013425	0.00838149	0.0153643	0.0088203	0.0085076	0.00700531	0.0190143	0.00768539	0.0107211	0.0108399	0.0125325	0.00761879	0.00804272	0.0115972	0.0116836	0.0111705	0.00840176	0.0128987	0.0148	0.0102	0.0114839	0.00735607	0.00634858	0.00987576	0.00879958	0.0117811	0.0113328	0.0115888	0.00932299	0.00846533	0.0110072	0.00988164	0.00757446	0.00675605	0.0110073		0.0102375	0.0105687	0.00994116		0.000627533
122	R<->T	1	0.00131137	0.00227808	0.00111831	0.000186278	0.00169139	0.000768574	0.00208377	4.33552e-07	0.00171644	0.00168044	0.00209576	0.00179269	0.000851132	0.0016784	0.00140741	0.000509002	0.00116237	0.00236854	0.00257697	0.00250995	0.00209662	0.00249631	0.00276026	0.00346995	0.00281081	0.0027861	0.00424183	0.00208092	0.00256077	0.00224944	0.00225637	0.00286986	0.00253222	0.00284357	0.00317689	0.00290348		0.00205341	0.00131364	0.00271531		-0.00140167
123	N<->T	1	0.00994019	0.0151841	0.0156029	0.0201549	0.0143675	0.0218618	0.012001	0.0181674	0.017892	0.0125106	0.0154627	0.0122088	0.0139526	0.0091358	0.0117821	0.0112294	0.0127016	0.0125411	0.00810788	0.00828333	0.00883838	0.00983101	0.00910545	0.00968453	0.00910816	0.00811915	0.00977809	0.00950314	0.0085069	0.00899471	0.0096874	0.00953136	0.0110057	0.00932	0.0102104	0.00740842		0.0117145	0.0143621	0.00934554		0.00501654
124	D<->T	2	0.00205191	0.00174565	0.00117233	0.000373774	0.000729508	0.00115048	0.00286286	4.33552e-07	0.00360215	0.00275775	0.00320087	0.00281662	0.00304061	0.00225219	0.00515242	0.00520002	0.00204974	0.00178874	0.0018662	0.00196003	0.00199651	0.00161816	0.00169995	0.00207067	0.00145256	0.00200906	0.00168251	0.00137389	0.00171802	0.00122463	0.00136917	0.00215087	0.0018	0.00157442	0.00213113	0.00147264		0.00203107	0.00236231	0.00173469		0.000627619
125	C<->T	2	0.0127578	4.35602e-07	0.0212981	0.00473156	0.0123384	0.0206359	0.0120833	0.0303754	0.00893508	0.00981723	0.0145828	0.00291858	0.0127699	0.0118712	0.00597043	0.0222455	0.0106025	0.00841064	0.00537114	0.00436262	0.00753619	0.00543026	0.0116667	0.00767688	0.00753059	0.00970984	0.00554751	0.00562613	0.007711	0.0107389	0.00707627	0.00528	0.00822418	0.0111117	0.00991599	0.00746322		0.010009	0.0125844	0.00770472		0.00487963
126	Q<->T	2	0.0091964	0.0124714	0.00435438	0.00293192	0.0108635	0.00606666	0.00908823	0.00816792	0.00998282	0.0114379	0.00927711	0.00436476	0.013308	0.00959488	0.0151766	0.0112292	0.00574943	0.00492761	0.00550183	0.0044431	0.00427325	0.00381414	0.00449786	0.00554929	0.00410967	0.00484767	0.00477782	0.00321275	0.00442836	0.0049162	0.00388	0.00511859	0.00415812	0.00508	0.00572811	0.00411944		0.00668458	0.00901535	0.00459915		0.00441621
127	E<->T	2	0.00499942	0.0038261	0.00311219	0.00324737	0.00325296	0.00525701	0.00396882	0.0012933	0.00605469	0.00815744	0.00374062	0.0037346	0.00547124	0.00541821	0.00372587	0.00592286	0.00621787	0.00255572	0.00210917	0.00289546	0.00281498	0.0020984	0.0030469	0.00290797	0.00247641	0.00332821	0.00317706	0.00257326	0.00247937	0.00312	0.00193703	0.00288991	0.00246	0.00326	0.00285476	0.00262843		0.00358371	0.00455298	0.00271648		0.0018365
128	G<->T	2	0.000830426	0.00088773	4.47215e-07	0.000271028	0.000174561	0.000660698	0.000423038	0.000344722	0.000487412	0.00109834	0.000786376	0.000470751	0.000660972	0.000312709	0.00137121	2.6714e-05	0.000395512	0.000778128	0.000403767	0.000562873	0.000371537	0.000809704	0.000514442	0.000781993	0.000248064	0.000222374	0.000738398	0.000557514	0.000605	0.000661561	0.000764498	0.000759	0.00078	0.000436	0.000688248	0.000311042		0.000561022	0.000541332	0.000578639		-3.73073e-05
129	H<->T	2	0.00288454	0.00282476	4.47215e-07	5.09653e-07	5.45162e-07	4.57585e-07	0.00115791	4.33552e-07	0.0022766	0.00315218	0.000458917	5.95066e-07	0.000660207	0.00118739	0.00393939	0.00198182	0.00247826	0.00245051	0.00240334	0.00209166	0.00201942	0.00226174	0.00259076	0.00287096	0.00198041	0.00253302	0.00221634	0.00188	0.00210447	0.00169499	0.0022	0.00282	0.00228	0.00272643	0.00289804	0.00299666		0.00188955	0.00135323	0.00236941		-0.00101618
130	I<->T	1	0.00464577	0.00407589	0.000377664	0.00671948	0.00308877	0.00235341	0.00268145	0.00242169	0.00322826	0.00451354	0.00519422	0.00647792	0.00305309	0.00466567	0.006468	0.00389704	0.00643633	0.00417187	0.00249	0.00660074	0.00307296	0.00510369	0.00316893	0.00189692	0.00394479	0.00312289	0.0025	0.00528197	0.00604429	0.00432	0.00347	0.00617	0.00438947	0.00337	0.00268386	0.00327312		0.00403816	0.00413519	0.00395134		0.000183847
131	L<->T	2	0.00091218	0.00180381	0.00141556	0.00209803	0.000655426	0.000828746	0.00126578	0.00104405	0.00100195	0.00251271	0.00109278	0.00109436	0.000570607	0.00125007	0.00287722	0.000980971	0.00297469	0.00110421	0.0022751	0.00136217	0.000900183	0.00163004	0.00113129	0.00120931	0.00117699	0.00144	0.000987518	0.000908974	0.00165	0.00147	0.00121	0.00172027	0.00114	0.00136	0.00122659	0.00106354		0.0013707	0.00143406	0.00131401		0.000120047
132	K<->T	1	0.00440475	0.00566005	0.00330177	0.00394889	0.00351123	0.00737222	0.00500792	0.00576264	0.00595747	0.00677993	0.00674548	0.00470032	0.00773831	0.00564683	0.00527719	0.00594348	0.00655288	0.00584003	0.00356062	0.00541819	0.00510574	0.00490038	0.0052003	0.00564197	0.00537	0.00500923	0.00876832	0.00578	0.00424	0.00421	0.00439261	0.00551	0.00545	0.00579	0.00541194	0.00524298		0.00542094	0.00554773	0.00530749		0.000240238
133	M<->T	1	0.0084477	0.00540524	0.0069546	0.00458609	0.00518349	0.00817118	0.00631129	0.00448592	0.00681771	0.00647697	0.005857	0.0147497	0.00652777	0.00661917	0.00867399	0.00955848	0.00768947	0.0104053	0.00936	0.00901783	0.00913615	0.00872189	0.00873023	0.00852	0.00917798	0.00841611	0.0104	0.0105	0.0109	0.0084053	0.00976	0.0104	0.00927	0.00804	0.00898899	0.00892501		0.00832196	0.00720681	0.00931973		-0.00211291
134	F<->T	2	0.000660894	0.00270527	4.47215e-07	0.000918818	0.000377922	0.000413213	0.00190997	0.00255462	0.000620645	4.21607e-07	0.00128161	0.00035488	0.000409938	0.00169294	0.00200196	0.000243562	0.00121128	0.000542219	0.00110197	0.000690432	0.000522538	0.000762296	0.000822	0.000594049	0.000553168	0.000574	0.000567	0.000478	0.00103111	0.000753	0.000615	0.000972	0.000464	0.000661	0.000594794	0.000810293		0.000846313	0.00102108	0.00068994		0.000331142
135	P<->T	1	0.00233318	0.000516911	0.00175179	0.000653732	0.000591348	0.00104011	0.00107367	0.000924026	0.00278672	0.00173583	0.00250302	0.00121422	0.0015754	0.00132843	0.00343353	0.0014373	0.00322408	0.00256981	0.00348153	0.00392082	0.00242719	0.00319	0.00245952	0.00213952	0.00249	0.0023	0.00261	0.00265576	0.00259	0.0037	0.0026	0.00329	0.00232	0.00245558	0.00208812	0.00230312		0.00221429	0.00165431	0.00271531		-0.001061
136	S<->T	1	0.0390896	0.0471091	0.0447651	0.0423441	0.0558638	0.0503639	0.04218	0.0629123	0.0460924	0.0548191	0.0515864	0.039329	0.0419074	0.0388344	0.0318956	0.0649524	0.0395908	0.036129	0.0356271	0.0272	0.0339	0.0241402	0.0338275	0.0284	0.0308	0.0348	0.0263412	0.0325	0.0321	0.0382	0.0341	0.0301	0.0366276	0.0336999	0.0345804	0.0343367		0.0391957	0.0466844	0.0324952		0.0141892
137	A<->W	2	0.0013913	4.35602e-07	4.47215e-07	5.09653e-07	0.000222382	4.57585e-07	0.00180255	0.00125128	5.09728e-07	4.21607e-07	0.000625231	5.95066e-07	0.000214349	0.000216178	0.000512934	4.80209e-07	0.000459948	0.000736179	0.000761794	0.00123267	0.00120414	0.00070945	0.000863	0.000949	0.000725	0.00112027	0.00115	0.000505	0.000711	0.000975	0.0012	0.00104043	0.00102243	0.000732	0.00107423	0.00105923		0.000679745	0.000394118	0.000935306		-0.000541187
138	R<->W	1	5.12055e-07	4.35602e-07	0.00110785	0.00189431	0.00166631	0.000562189	0.00204177	4.33552e-07	5.09728e-07	0.00288509	0.00119616	0.00338863	4.5246e-07	0.000148629	0.00626411	0.0014911	0.00221564	0.00172384	0.00285757	0.00529799	0.00405797	0.00277	0.00248	0.00188	0.00528615	0.00299	0.00513	0.00262	0.00312	0.0031	0.00223241	0.00434883	0.00303	0.00208	0.00215742	0.00381613		0.00238451	0.0014626	0.00320939		-0.00174679
139	N<->W	3	5.12055e-07	4.35602e-07	4.47215e-07	0.00114394	0.00935187	0.000522036	5.33607e-07	4.33552e-07	0.000657065	4.21607e-07	0.000303341	5.95066e-07	0.00113743	4.6429e-07	1.71468e-07	4.80209e-07	0.00211366	0.000211066	0.000683674	0.000495	7.28e-05	0.000109	9.62e-05	0.000205161	0.000381	0.000202	4.53e-05	4.08e-05	0.000218	0.000286411	0.000129312	0.00032	2.72e-05	0.000113	0.000411996	2.76231e-05		0.000536372	0.000896108	0.000214502		0.000681606
140	D<->W	3	5.12055e-07	4.35602e-07	4.47215e-07	5.09653e-07	5.45162e-07	4.57585e-07	0.000342373	4.33552e-07	5.09728e-07	4.21607e-07	4.50555e-07	5.95066e-07	0.00123983	4.6429e-07	0.00117592	4.80209e-07	0.000348286	5.56e-05	0.000372222	0.000515058	6.24e-05	0.0002036	0.000105617	7.25e-05	4.66e-05	0.000173499	9.24e-05	7.15e-05	0.00024673	0.000278235	1.64e-05	0.000305	6.02e-05	5.5e-05	8.26249e-05	1.04082e-05		0.000164952	0.000183098	0.000148715		3.43826e-05
141	C<->W	1	0.00213322	0.00992085	0.00720169	5.09653e-07	5.45162e-07	4.57585e-07	0.00475413	4.33552e-07	0.00711955	0.00493902	4.50555e-07	0.00400769	4.5246e-07	0.000659186	0.00593789	0.0011408	5.12374e-07	0.00542717	0.00171253	0.00944646	0.00739345	0.00736198	0.00396541	0.00122909	0.00829522	0.00398701	0.0047729	0.00656585	0.00262056	0.00171448	0.00759	0.0055888	0.00738086	0.00343395	0.00141771	0.00402254		0.00393732	0.00281279	0.00494347		-0.00213069
142	Q<->W	2	5.12055e-07	0.000994069	0.00117726	5.09653e-07	0.00117015	4.57585e-07	0.000916043	4.33552e-07	5.09728e-07	4.21607e-07	0.00088088	5.95066e-07	4.5246e-07	0.00136979	0.000865185	4.80209e-07	0.00224513	0.000615915	0.00283773	0.000856558	0.000711961	0.00080951	0.000656637	0.000677466	0.00182551	0.0005693	0.000969411	0.000446353	0.00106663	0.00062	0.000479232	0.00139764	0.000765193	0.000393093	0.000783747	0.000541706		0.000740179	0.000566051	0.000895978		-0.000329927
143	E<->W	2	5.12055e-07	4.35602e-07	4.47215e-07	5.09653e-07	5.45162e-07	4.57585e-07	5.33607e-07	4.33552e-07	5.09728e-07	4.21607e-07	4.50555e-07	5.95066e-07	4.5246e-07	4.6429e-07	1.71468e-07	4.80209e-07	5.12374e-07	7.23e-05	0.00092033	0.000761639	0.000238923	0.000324695	0.00017323	0.000167038	0.000291771	0.000177143	0.000165682	0.000146942	0.000393	0.00034755	0.000117833	0.000648392	0.000109114	7.54e-05	0.00018375	0.000112864		0.000150987	4.66599e-07	0.000285663		-0.000285196
144	G<->W	1	5.12055e-07	4.35602e-07	4.47215e-07	5.09653e-07	0.000131973	4.57585e-07	0.000546456	4.33552e-07	5.09728e-07	4.21607e-07	4.50555e-07	0.000220002	4.5246e-07	0.000550193	1.71468e-07	4.80209e-07	0.0012313	0.00127557	0.00194425	0.00316721	0.00206334	0.0017774	0.00125583	0.00138137	0.00211837	0.00169096	0.00118878	0.0025	0.00219483	0.00126229	0.00170478	0.00239857	0.00177384	0.00107988	0.00114715	0.00190307		0.00101424	0.000157953	0.00178039		-0.00162244
145	H<->W	3	0.00772044	0.0112878	0.00496535	5.09653e-07	0.00675419	0.00446304	0.0106281	0.0133786	0.0181888	0.0140525	0.00931299	0.00286393	0.00692169	0.017257	0.00282093	0.0030963	0.00211198	0.00239132	0.00559118	0.00152742	0.00217885	0.00226101	0.00202472	0.00517163	0.00285312	0.00203268	0.00292	0.000769276	0.00378683	0.00260288	0.00377184	0.00304428	0.00303119	0.00228	0.00529654	0.000801332		0.00528223	0.00798966	0.00285979		0.00512986
146	I<->W	3	0.00371935	4.35602e-07	4.47215e-07	5.09653e-07	5.45162e-07	4.57585e-07	0.000115894	4.33552e-07	0.000192942	4.21607e-07	4.50555e-07	5.95066e-07	0.0009527	0.00103686	0.000121557	4.80209e-07	0.000300277	0.000630944	0.000450126	0.000479334	0.000760692	0.000518902	0.00100321	0.000918558	0.000263811	0.00108	0.000236326	0.000454137	0.00039251	0.000202955	0.000345343	0.000648349	0.000234	0.000377135	0.000677167	0.000828505		0.000470732	0.00037908	0.000552737		-0.000173657
147	L<->W	1	0.00102087	0.00192864	0.0012148	5.09653e-07	0.00139365	0.000551079	0.0015166	4.33552e-07	0.00201242	0.00132934	0.0032165	0.0023123	4.5246e-07	0.000697531	0.00663087	4.80209e-07	0.00127171	0.00504214	0.00269962	0.00358081	0.00567887	0.00335947	0.00572098	0.00348492	0.0032	0.00548257	0.00342277	0.00499287	0.00309159	0.0062071	0.00720859	0.00375	0.0059948	0.00511274	0.00396299	0.00650879		0.00315555	0.00147636	0.00465798		-0.00318162
148	K<->W	2	5.12055e-07	0.000700922	4.47215e-07	4.20973e-05	5.45162e-07	0.000379828	2.52236e-05	4.33552e-07	0.000368217	4.21607e-07	0.000291518	5.95066e-07	4.5246e-07	0.00084688	0.00210715	4.80209e-07	5.12374e-07	0.000183663	0.000294718	0.000439505	0.000537588	0.000262968	0.000115254	7.97e-05	0.000191301	0.000296153	0.000417498	0.000121194	0.00021207	0.000137689	1.5e-05	0.000423364	0.000120668	0.000235	9.06152e-05	7.06679e-05		0.000250301	0.000280367	0.000223401		5.69659e-05
149	M<->W	2	5.12055e-07	4.35602e-07	0.00171139	5.09653e-07	0.000682815	0.00167535	0.00354022	4.33552e-07	5.09728e-07	4.21607e-07	0.00157848	0.000929428	4.5246e-07	4.6429e-07	1.71468e-07	4.80209e-07	0.00390157	0.00339671	0.00515206	0.0036787	0.00505079	0.00333786	0.00407671	0.00302264	0.00316184	0.00423061	0.00306681	0.00341178	0.00386973	0.00858457	0.00268125	0.00425219	0.00239	0.00409101	0.00379869	0.00568672		0.00252679	0.000824921	0.00404951		-0.00322459
150	F<->W	2	0.0198399	0.0107285	0.0156169	5.09653e-07	0.0191427	0.0119705	0.0126772	0.0117999	0.0230812	0.00860372	0.0109367	0.00606501	0.00678214	0.0150398	0.0251372	0.00799138	0.00749073	0.0145818	0.014358	0.0100633	0.0186475	0.0199596	0.0166098	0.0198666	0.0142754	0.0214432	0.0112719	0.0110519	0.0196493	0.0148486	0.0159283	0.0125	0.0133024	0.0172425	0.0188541	0.0162994		0.0142683	0.0125238	0.0158291		-0.00330536
151	P<->W	2	0.006834	0.00171714	4.47215e-07	5.09653e-07	5.45162e-07	4.57585e-07	5.33607e-07	4.33552e-07	0.00155548	4.21607e-07	4.50555e-07	5.95066e-07	0.00176522	0.000265774	0.00221003	4.80209e-07	5.12374e-07	0.000526317	0.00107033	0.000320957	0.000454269	0.000573431	0.000517605	0.000574317	0.000628683	0.000194097	0.00088909	0.000306084	0.0004413	0.000818613	0.000491	0.000625308	0.00045767	0.000592	0.000773793	0.000628533		0.000701012	0.000844296	0.00057281		0.000271486
152	S<->W	1	0.00359964	0.00167713	4.47215e-07	5.09653e-07	5.45162e-07	0.000899772	4.29393e-05	4.33552e-07	5.09728e-07	0.000619311	0.00169201	0.000188493	4.5246e-07	0.000495635	1.71468e-07	4.80209e-07	0.00172454	0.000988624	0.0015726	0.00116803	0.00183868	0.00101258	0.00114076	0.000966749	0.00164402	0.00109021	0.00119166	0.000839083	0.00133342	0.00117	0.00099229	0.00170067	0.00101	0.000873	0.0015702	0.00119238		0.000951055	0.000643707	0.00122605		-0.000582344
153	T<->W	2	5.12055e-07	2.92202e-05	4.47215e-07	0.000770086	5.45162e-07	0.00120046	0.00266776	4.33552e-07	5.09728e-07	4.21607e-07	4.50555e-07	5.95066e-07	4.5246e-07	4.6429e-07	0.00281377	4.80209e-07	0.0020382	0.000673967	0.000690339	0.000988508	0.000426138	0.000656439	0.000566449	0.000689209	0.000813022	0.000510706	0.000626362	0.000446996	0.000674	0.00118666	0.000643821	0.000932	0.000731	0.000613947	0.000558585	0.000996766		0.000637492	0.000560283	0.000706574		-0.000146291
154	A<->Y	2	0.000957845	0.000199549	0.000639427	5.09653e-07	0.000666318	0.000298304	0.000662702	0.000464378	0.000537727	7.84948e-05	0.000171927	5.95066e-07	0.000310591	0.000501963	0.00181882	0.000947856	0.000101496	0.000350174	0.00189837	0.000993826	0.000823651	0.000701588	0.000786878	0.000475466	0.000729829	0.00108865	0.000791694	0.000422	0.00128025	0.000932116	0.000262	0.00117	0.000397437	0.000706	0.000472172	0.00103734		0.000657721	0.000491677	0.000806286		-0.000314609
155	R<->Y	2	8.12836e-05	0.000387903	0.000182911	0.000126007	5.45162e-07	0.000226184	0.000441234	4.33552e-07	0.000205823	0.000523151	0.000910229	0.000680107	0.000403522	0.00035066	0.00162234	0.000952053	0.00235099	0.000380935	0.00156	0.00137834	0.00102876	0.0012053	0.00123113	0.000490257	0.000865182	0.00192686	0.00123	0.00104168	0.00165475	0.00127	0.000264	0.00172238	0.000441	0.00117037	0.000618587	0.00153002		0.00084597	0.00055561	0.00110577		-0.000550155
156	N<->Y	1	0.000580025	0.00206562	0.00177499	0.00595616	0.00156996	0.000131327	0.00283615	4.33552e-07	0.00191925	0.00032648	0.00110932	0.00218293	0.00420643	0.00336163	0.0012778	0.000828486	0.00181506	0.0015304	0.00263286	0.00324444	0.00186251	0.00230786	0.00140004	0.00272973	0.00268174	0.00226	0.0017993	0.00238359	0.00281	0.00136	0.00113458	0.00374	0.0015519	0.00125551	0.00200996	0.00190391		0.00201501	0.00187894	0.00213675		-0.000257811
157	D<->Y	1	5.12055e-07	0.000674429	4.47215e-07	0.00286744	5.45162e-07	4.57585e-07	5.33607e-07	0.0024473	0.000123145	4.21607e-07	0.000148332	0.000213099	4.5246e-07	0.000564628	0.00179415	0.000365641	0.000166173	0.000427665	0.000677474	0.000834571	0.000470559	0.000797489	0.00024671	0.000197645	0.000568	0.00049218	0.000257508	0.000667	0.00067	0.000336418	0.000198	0.00102061	0.000375598	0.000228651	0.000164253	0.000405518		0.00051121	0.000551042	0.000475571		7.54704e-05
158	C<->Y	1	0.00506801	0.0100607	0.00601976	0.0159035	5.45162e-07	4.57585e-07	0.00660047	4.33552e-07	0.00445577	4.21607e-07	0.000480999	0.0180519	0.00921039	0.0121859	0.00869801	0.00917526	0.0110299	0.00676045	0.00483	0.0091603	0.0119944	0.00897853	0.00649372	0.00398	0.0132082	0.0056838	0.00864	0.0116	0.00733726	0.00314	0.00731819	0.00755875	0.00803613	0.00597	0.00548808	0.00726409		0.0072329	0.00687897	0.00754957		-0.000670603
159	Q<->Y	2	0.00102717	0.00267147	4.47215e-07	5.09653e-07	0.00130563	4.57585e-07	0.00227088	0.000712587	5.09728e-07	0.000655017	4.50555e-07	0.00178857	0.00112496	0.00210737	0.00302016	0.000864919	0.00127416	0.000315705	0.0021976	0.000967541	0.000851398	0.00112114	0.000428	0.000671376	0.000966877	0.000836	0.00056	0.000198331	0.00146	0.000830047	0.000159882	0.00150357	0.000367	0.000385	0.00052653	0.000802598		0.000943718	0.00110737	0.000797294		0.000310074
160	E<->Y	2	0.000961266	4.35602e-07	4.47215e-07	0.000626104	5.45162e-07	4.57585e-07	0.000149554	4.33552e-07	0.000191474	4.65328e-05	4.50555e-07	5.95066e-07	0.00108331	0.000418776	1.71468e-07	4.80209e-07	5.12374e-07	0.000102674	0.000775569	0.000519963	0.000341322	0.000365	0.000214917	0.000139822	0.000233	0.000403	0.000128549	8.54e-05	0.00052237	0.000229564	0.000123798	0.00076	0.00015	0.000149517	0.000111249	0.000237354		0.000252073	0.000204797	0.000294372		-8.95754e-05
161	G<->Y	2	0.000201852	4.35602e-07	4.47215e-07	5.19489e-05	5.45162e-07	4.57585e-07	0.000109624	0.000289314	5.09728e-07	4.21607e-07	4.50555e-07	4.03038e-05	9.78445e-05	4.6429e-07	0.000765732	4.80209e-07	5.12374e-07	0.000160669	0.000405877	0.000401	0.000125	0.000703651	0.000144688	0.00018	8.56e-05	0.000258192	7.11e-05	0.000120337	0.00031838	0.000401621	0.000143	0.00042	0.000105473	0.00023651	0.000114471	8.41505e-05		0.000167807	9.18438e-05	0.000235775		-0.000143931
162	H<->Y	1	0.0242042	0.0267919	0.0348232	0.0464836	0.0323368	0.032771	0.0228685	0.0234406	0.0231753	0.0145184	0.024452	0.0345237	0.0323959	0.0253194	0.0183163	0.0181938	0.0330376	0.0329187	0.0354714	0.0426464	0.0296589	0.0345983	0.0328	0.031598	0.0364877	0.024414	0.0463078	0.0291891	0.0379885	0.0295	0.035	0.029478	0.0348676	0.0321	0.0306272	0.0338707		0.0307549	0.027509	0.0336591		-0.00615011
163	I<->Y	2	0.000520525	4.35602e-07	0.000124393	0.00114686	5.45162e-07	0.000615685	0.00092052	4.33552e-07	0.000843692	0.000363902	0.000363093	0.00140797	0.000557522	0.00110351	0.00322117	0.00210904	0.00132106	0.000431042	0.00120602	0.000887699	0.000348407	0.000853	0.000586934	0.000551992	0.000462467	0.000810396	0.00052485	0.00043455	0.000814	0.000431	0.000227532	0.00131329	0.000439	0.00074394	0.000870211	0.000553362		0.000753057	0.000860021	0.000657352		0.000202669
164	L<->Y	2	0.00446281	0.00164109	0.00248232	0.000628555	0.00281437	0.00290449	0.00134086	0.000920874	0.00115149	0.00272434	0.000956294	0.000322169	0.000581013	0.00350457	0.00217246	0.00293378	0.00238325	0.000525925	0.00268736	0.00134	0.000759	0.00123152	0.00104686	0.00136842	0.000781282	0.0014978	0.00103816	0.000485	0.00126	0.00162259	0.000564761	0.00164	0.000637296	0.000983	0.00104191	0.00103248		0.00154078	0.00199557	0.00113386		0.000861712
165	K<->Y	2	5.12055e-07	0.000394311	0.000154285	0.000110039	5.45162e-07	0.000555819	0.000325367	4.33552e-07	4.33371e-05	0.000209193	0.000322381	5.95066e-07	4.5246e-07	0.000610658	0.00158758	0.000423568	5.12374e-07	8.29e-05	0.000652	0.000488774	0.000217152	0.000266966	0.000245112	0.000229753	0.000244116	0.000419965	0.000424	8.95e-05	0.00049389	0.000113967	9.38e-05	0.000758131	0.00012	0.000427	4.68514e-05	0.000557561		0.000297529	0.000278799	0.000314286		-3.5487e-05
166	M<->Y	3	0.00545996	0.00328737	4.47215e-07	5.09653e-07	0.00154239	0.00035294	0.00410504	4.33552e-07	0.000704882	0.000293181	0.00189814	0.00243465	0.00195369	0.00119071	0.00336878	0.00314086	0.00271775	0.0013921	0.00328827	0.00252943	0.0014829	0.00169957	0.00148429	0.00210617	0.00101418	0.00172	0.00151332	0.000768006	0.00183363	0.00155	0.000713546	0.0024	0.000791	0.00117	0.00136581	0.00119842		0.00173534	0.00190893	0.00158003		0.000328892
167	F<->Y	1	0.0584208	0.0710852	0.0732671	0.0958346	0.0683048	0.0750603	0.0736115	0.0888134	0.0818413	0.0615289	0.0718308	0.0614311	0.0677211	0.0733773	0.0508663	0.077113	0.0520613	0.077422	0.0513818	0.0502059	0.0603288	0.0579407	0.0840843	0.0915461	0.0654	0.0601688	0.0526597	0.073138	0.0488	0.0720709	0.083	0.0417	0.0726	0.0774	0.0711998	0.0574042		0.0680728	0.0707158	0.0657079		0.00500786
168	P<->Y	2	5.12055e-07	4.35602e-07	0.000875736	0.000200701	0.000487838	4.57585e-07	5.33607e-07	4.33552e-07	0.000901179	4.21607e-07	4.50555e-07	5.95066e-07	4.5246e-07	0.000363567	7.71742e-05	4.80209e-07	0.00122014	8.54e-05	0.000640529	0.000445636	0.000279092	0.000655417	0.000245954	0.000167	0.000449507	0.000364488	0.000279347	0.000148	0.00068102	0.00046	0.00013	0.000636	0.000165	0.000314	0.000225531	0.000329528		0.000300904	0.000243006	0.000352708		-0.000109702
169	S<->Y	1	0.00398142	4.35602e-07	0.00199927	0.00160773	0.000956459	0.00108336	0.00286609	4.33552e-07	0.000505293	0.00034229	0.00101791	0.00577726	0.000202019	0.00247563	0.00163335	4.80209e-07	0.000582943	0.00111355	0.00149801	0.00239868	0.00143347	0.00147865	0.000987	0.00104058	0.00218041	0.00146555	0.00173	0.00131255	0.00215	0.00168	0.000862	0.00236	0.000992	0.00100431	0.000660711	0.00134002		0.00146444	0.00147249	0.00145724		1.52563e-05
170	T<->Y	2	0.000152162	0.000519869	5.31425e-05	5.09653e-07	5.45162e-07	0.000352135	0.00129974	4.33552e-07	0.00242485	0.00119586	0.00127963	0.00106666	0.000576131	0.00173731	0.00110593	0.00227058	0.00149897	0.000533641	0.002071	0.000931105	0.00080339	0.00101	0.000748352	0.000498428	0.000701555	0.00108	0.000628815	0.000482	0.00117	0.00086	0.000485	0.00135	0.000474226	0.000817	0.000904015	0.00104584		0.000892468	0.000913792	0.000873388		4.04044e-05
171	W<->Y	2	0.0134441	0.0131393	0.0186306	0.00229534	0.0171741	0.0123558	0.0196358	0.00616883	0.0195688	0.0157414	0.023116	0.0138662	0.00763937	0.0162293	0.0172714	0.00297175	0.0184996	0.021374	0.0167303	0.0142	0.023	0.0246255	0.0253948	0.0242636	0.0204	0.0169855	0.0157	0.0296	0.0201	0.018	0.0251	0.0150566	0.0206	0.0187	0.0299106	0.0129059		0.017511	0.0139852	0.0206656		-0.00668047
172	A<->V	1	0.00855325	0.00764816	0.00752258	0.00718709	0.00600369	0.00628508	0.00954716	0.0102241	0.00720603	0.0062402	0.00730773	0.0126702	0.00690847	0.00867023	0.00607299	0.00846621	0.0109602	0.008249	0.0152773	0.0156867	0.0108765	0.0120456	0.00895875	0.00724	0.0124733	0.012	0.00991	0.0108	0.0164	0.0106	0.00814446	0.0136	0.00936	0.00941	0.00803475	0.0141439		0.00974121	0.00808667	0.0112216		-0.00313492
173	R<->V	2	0.000586104	0.000440751	0.000277447	0.000324705	0.000514464	0.00069994	0.000344678	0.00037527	0.000199523	4.21607e-07	0.000460134	0.000647569	0.000258599	0.000470962	0.000305902	0.000299982	0.000364692	0.000628578	0.000794688	0.000856308	0.000489722	0.000827614	0.000591	0.000821199	0.000463	0.00074	0.000525	0.000451	0.000869	0.000795447	0.00049	0.000992	0.000515	0.000684717	0.000675697	0.000626443		0.000539099	0.000386538	0.000675601		-0.000289063
174	N<->V	2	0.000626832	0.000505651	4.47215e-07	0.000641939	9.39422e-05	0.000468901	0.000412217	0.000245686	0.000198921	0.000804203	0.00147988	0.000553822	0.000173084	0.000794693	0.000190295	0.00128544	0.000902454	0.000424193	0.000296542	0.000335	0.000166528	0.000653	0.000246665	0.000495	0.000104	0.000348	0.000205	0.000183	0.00034838	0.000604	0.000244	0.000551	0.000200414	0.000339	0.000478617	0.000209999		0.000439187	0.000551671	0.000338544		0.000213127
175	D<->V	1	0.000309317	0.000326126	4.47215e-07	0.000380053	6.46398e-05	4.57585e-07	0.000237396	0.000557861	4.47031e-06	4.21607e-07	4.90069e-05	5.95066e-07	0.000348313	0.000116207	0.000622243	4.80209e-07	0.000318763	6.74e-05	7.91e-05	0.000332	5.92e-05	0.000399603	7.64e-05	8.15e-05	5.3e-05	8.73e-05	5.48e-05	0.000132126	0.000143	3.78e-05	6.25e-05	0.000392967	4.16e-05	4.67e-05	4.75506e-05	3.35139e-05		0.000154579	0.000196282	0.000117266		7.9016e-05
176	C<->V	2	0.0110396	0.00442368	0.00563723	0.00209092	0.009155	0.00917406	0.0102501	0.000310558	0.0128321	0.0114164	0.0148211	0.00585599	0.0203963	0.0150201	0.0122704	0.0162311	0.0121831	0.0115176	0.00445662	0.00591495	0.0126082	0.0108978	0.014149	0.0149	0.00776118	0.0216	0.00848098	0.00614	0.0122124	0.013	0.00901937	0.00931	0.011913	0.0146061	0.0161771	0.012673		0.0108457	0.0101828	0.0114388		-0.00125599
177	Q<->V	2	0.00303221	0.00264304	0.00283477	7.19273e-05	0.00123076	0.00345422	0.00189771	0.000903137	0.00235463	0.00208914	0.00187694	0.000734924	0.00241903	0.00329912	0.00232506	0.00153281	0.00123669	0.000920026	0.000782033	0.000772091	0.000518438	0.00104243	0.000781	0.000881998	0.000718	0.000889736	0.000395	0.000658824	0.00105	0.000827541	0.000809	0.00123659	0.000639428	0.000786362	0.000872823	0.000673536		0.00136642	0.00199624	0.000802887		0.00119336
178	E<->V	1	0.00231713	0.0018014	0.00105936	0.00139554	0.00113432	0.00137829	0.00122536	0.000942981	0.00138778	0.000670566	0.00123436	0.00177001	0.00328573	0.00231836	0.00193161	0.000718676	0.00127376	0.000784409	0.00119662	0.0013842	0.000834677	0.00151	0.000971198	0.000752	0.000765105	0.00112	0.000359296	0.00112	0.00115953	0.00091	0.000746995	0.00167679	0.000590721	0.00101	0.000625707	0.000824702		0.00122742	0.00152031	0.000965366		0.000554941
179	G<->V	1	5.12055e-07	0.000203021	6.77038e-05	0.000541919	8.63154e-05	4.57585e-07	1.1734e-05	0.000266262	5.09728e-07	5.82113e-05	8.02168e-05	0.000107029	0.000106649	3.54532e-05	0.000128436	4.94615e-06	0.000245263	0.000287269	4.57e-05	0.000749	0.000174	0.000752833	0.000225	0.000222474	9.41e-05	0.00020065	0.000414	0.000665764	0.000298	0.000233	0.000200023	0.000745587	0.000207	0.000227542	0.00013766	0.000254253		0.000224403	0.000114391	0.000322834		-0.000208444
180	H<->V	2	0.00138467	4.35602e-07	4.47215e-07	0.000216434	0.000164612	0.000243806	0.00149325	0.000798174	0.00112044	0.000421316	0.000687186	5.95066e-07	0.00129054	0.00126596	0.000238388	4.80209e-07	0.000643531	0.000624893	0.000445671	0.000439991	0.000318444	0.000761	0.000700827	0.0010489	0.000365684	0.000576	0.000588722	0.000343	0.00047956	0.000890105	0.000466968	0.000753	0.00034285	0.000814	0.000755499	0.000373914		0.000584981	0.000586487	0.000583633		2.85383e-06
181	I<->V	1	0.0474649	0.0527242	0.0571987	0.0567957	0.0508505	0.0463312	0.051733	0.0604542	0.0546462	0.0569708	0.0564881	0.0641149	0.0415778	0.0460097	0.0399219	0.0610378	0.05569	0.0718678	0.0596816	0.0505	0.0584	0.0679831	0.0708037	0.0663805	0.0587	0.0650037	0.0732	0.0726494	0.0597416	0.072372	0.0695	0.0510171	0.0726	0.073428	0.0687302	0.0639371		0.0596252	0.0529417	0.065605		-0.0126633
182	L<->V	1	0.00696991	0.010954	0.00718312	0.00870197	0.0100656	0.0103342	0.00976814	0.0118077	0.00768952	0.0080335	0.00993137	0.00813352	0.0064006	0.00935857	0.00692056	0.00943543	0.00952706	0.0109592	0.00650454	0.00661529	0.00652583	0.00972888	0.00829899	0.0107	0.00620177	0.00678	0.0104634	0.00865836	0.00751197	0.00796	0.0119661	0.00839	0.0106973	0.00858976	0.00953236	0.00780382		0.00875285	0.008895	0.00862567		0.000269327
183	K<->V	2	0.000966156	0.000284714	0.00124875	0.000468091	0.000473347	0.000842771	0.000618392	0.000497545	0.000633668	0.000534952	0.000458904	0.000686986	0.000898364	0.0012073	0.000611553	0.00060138	0.000555967	0.000518517	0.000955419	0.00085526	0.00051808	0.00088832	0.000946	0.00061847	0.000529	0.00101986	0.00063889	0.000606226	0.000815	0.00075684	0.000654	0.00113146	0.000456243	0.000850562	0.000722331	0.000832448		0.000719494	0.000681696	0.000753312		-7.16157e-05
184	M<->V	1	0.00472866	0.00415153	0.0109406	0.00468187	0.00448926	0.00527018	0.00689318	0.00513908	0.00507577	0.00670931	0.00424287	0.011339	0.00489062	0.00681997	0.00851153	0.00685005	0.00855061	0.00894109	0.00425932	0.00789665	0.00605203	0.00889	0.00699997	0.00714	0.00560608	0.00664029	0.0061357	0.0104	0.00755226	0.00711	0.00899834	0.00947046	0.00819266	0.00750165	0.00715457	0.00654108		0.00696573	0.00642848	0.00744643		-0.00101795
185	F<->V	1	0.000594752	0.00155675	0.000826806	0.00309531	0.00243247	0.00135566	0.00255863	0.00177234	0.00311993	0.00233609	0.00243812	0.00298358	0.00112723	0.0026224	0.00264987	0.00256602	0.00293592	0.00267424	0.00262298	0.00223	0.00266	0.00357112	0.00239	0.00299543	0.00250381	0.00275282	0.00417	0.00319446	0.00299	0.00206786	0.00183321	0.0033918	0.00265934	0.00317344	0.00279304	0.00316705		0.00252257	0.00217482	0.00283372		-0.000658899
186	P<->V	2	0.000996751	0.000646376	0.0002271	0.000472708	0.000661406	0.000530144	0.00130879	0.000349925	0.00150652	0.000816164	0.00128728	0.00100673	0.000778227	0.00160871	0.00128618	0.000810122	0.00142536	0.000962823	0.00197784	0.00152752	0.000998289	0.00133	0.00108698	0.00102224	0.00105628	0.00149	0.00102898	0.000968	0.00157329	0.00167785	0.00089971	0.00163326	0.000881079	0.0013125	0.00119327	0.00102442		0.00109341	0.000924617	0.00124444		-0.000319822
187	S<->V	2	5.12055e-07	4.35602e-07	4.47215e-07	0.000328217	5.45162e-07	0.000578159	0.000164911	4.33552e-07	0.000619585	4.21607e-07	0.00127435	0.000166737	0.000142878	0.000531311	0.00138734	4.80209e-07	0.000956146	0.000173714	0.000138306	0.000506252	8.71e-05	0.000323444	0.000172236	0.000125986	9.23e-05	0.000218391	3.04e-05	0.000142353	0.00055579	0.00042995	0.000119203	0.00058666	0.000131126	0.00019674	9.83904e-05	0.000128819		0.000289168	0.000361936	0.000224061		0.000137874
188	T<->V	2	0.0113678	0.00898003	0.00674122	0.00395793	0.00811143	0.00929792	0.0105761	0.0110484	0.0102898	0.014283	0.00920736	0.00974012	0.00912917	0.00943727	0.0104988	0.0109428	0.0111923	0.0104864	0.014223	0.00988935	0.0103174	0.00956383	0.0110547	0.008566	0.0103856	0.0120018	0.00718825	0.00912437	0.0140186	0.0116368	0.00897712	0.0108786	0.00887925	0.0110344	0.0104914	0.0116332		0.0101431	0.0096942	0.0105447		-0.000850543
189	W<->V	2	5.12055e-07	4.35602e-07	4.47215e-07	0.000254623	0.00204708	0.000437666	0.000193288	4.33552e-07	0.0011475	4.21607e-07	4.50555e-07	0.00055791	4.5246e-07	0.000421107	0.00195893	4.80209e-07	0.000665179	0.00107275	0.000585515	0.000777692	0.000616915	0.000852213	0.000785424	0.0014785	0.000701307	0.00126198	0.00075474	0.000946778	0.00080989	0.000365158	0.000840247	0.00109845	0.00109725	0.000718114	0.0011125	0.000681307		0.000673434	0.000452171	0.000871406		-0.000419235
190	Y<->V	2	0.0011988	0.00101981	0.001047	0.00119318	0.00127631	0.00107128	0.00124926	0.00101502	0.00119335	0.000987049	0.00105482	0.00139314	0.00105928	0.00108698	0.000401433	0.00112425	0.00119955	0.000659539	0.00183841	0.000790886	0.000556335	0.00095751	0.000859508	0.00110683	0.000486856	0.00148596	0.000904661	0.000428581	0.00099375	0.000515658	0.000637727	0.00136758	0.000599813	0.00091957	0.000622152	0.00112372		0.000984043	0.00109238	0.000887107		0.000205276

## Sheet: 2. ribo bact-AE
#	Exchange	Min subs	Saccharibacteria	Xanthomonadaceae	Oceanospirillales	Enterobacteriaceae	Chromatiales	Alteromonadaceae	Deltaproteobacteria	Comamonadaceae	Rhodospirillales	Rhodobacteraceae	Rhizobiales	Nitrospirae	Selenomonadales	Clostridiales	Lactobacillales	Bacillaceae	Elusimicrobia	Cyanobacteria	CPR_WWE3	CPR_Yanofskybacteria	CPR_Uhrbacteria	CPR_Nomurabacteria	CPR_Moranbacteria	CPR_Magasanikbacteria	CPR_Kaiserbacteria	CPR_Falkowbacteria	CPR_Woesebacteria	CPR_Roizmannbacteria	CPR_Levybacteria	CPR_Gottesmanbacteria	Chloroflexi_RBG	Flavobacteriaceae	Cytophagales	Bacteroidales	Micrococcineae	Verrucomicrobia	Archaea_Thaumarchaeota	Archaea_Methanomicrobia	Archaea_Halobacteriaceae	Archaea_DPANN	Archaea_Thermoprotei	Eukaryote_Coelomata	Eukaryote_Pezizomycotina		mean	mean bac	mean arch and euk
1	A<->R	2	0.000600881	0.000400671	7.2328e-05	8.72271e-05	0.00127281	0.0003585	0.000701858	0.000587559	0.000846811	0.00121809	0.00123665	0.000496428	0.000525682	0.00052521	0.000388636	0.000579579	0.000359425	0.000118528	0.000941335	0.00113322	0.000655589	0.000926798	0.00070117	0.000507919	0.000698714	0.000489875	0.000947765	0.00122719	0.000856307	0.000757612	0.00091177	0.00151593	0.000225528	0.00103835	0.000617092	0.00250481	0.00213082	0.00183229	0.00235469	0.0015554	0.00215348	0.0016876	0.000935403		0.000922873	0.00075094	0.0018071
2	A<->N	2	0.00432257	0.00445582	0.00365825	0.000760265	0.00284314	0.00554119	0.00205735	0.00339473	0.0029013	0.00457151	0.00209011	0.00138877	0.00383847	0.00346727	0.00412107	0.00243746	0.00527423	0.00213273	0.000514787	0.000948751	0.00328379	0.00123915	5.20198e-07	0.00311684	0.00133533	0.00193527	0.00159547	0.00132727	0.00166232	0.000657342	0.00320103	0.00266476	0.00473622	0.00341245	0.0080673	0.00287006	0.00198239	0.001656	0.00189575	0.00456711	0.00290141	0.00550849	0.00246046		0.00285573	0.00282847	0.00299595
3	R<->N	2	0.0017114	0.00269292	0.00129401	0.000365177	0.0020326	0.000934705	0.00208446	0.00175914	0.00229753	0.00119682	0.00274631	0.00416468	0.00190703	0.00163342	0.0027121	0.00289907	0.00173025	0.000596893	0.00211132	0.00174076	0.00152911	0.00164492	0.000813943	0.000649956	0.00284972	0.000767907	0.00425515	0.00252523	5.45832e-07	0.000141992	0.00330045	0.00219848	0.00224193	0.00180963	0.00238803	0.00774158	0.0024329	0.00443725	0.00268131	0.00402426	0.00224567	0.00192948	0.00433224		0.00222215	0.00204081	0.00315473
4	A<->D	1	0.00321847	0.00469737	0.00335842	0.00167959	0.00187955	0.00383034	0.00177642	0.00541194	0.00252131	0.00293849	0.00173422	0.00150858	0.00167123	0.00190396	0.00227443	0.00214463	0.00410934	0.00174139	0.00257141	0.00239533	0.00251477	0.00222491	0.00381353	0.00148589	0.00164547	0.00261618	0.00211103	0.00206343	0.00231897	0.00174412	0.00150074	0.00342844	0.00214301	0.00216088	0.00280193	0.00235843	0.00318147	0.00667792	0.000948581	0.0011845	0.00343245	0.00463045	0.00512927		0.00268565	0.00250828	0.00359781
5	R<->D	2	0.000628179	0.000270713	0.000215701	5.09653e-07	0.00015318	2.04952e-05	0.0003694	4.33552e-07	5.09728e-07	4.21607e-07	0.000149652	0.000762446	0.000516959	1.13148e-05	5.25524e-07	4.80209e-07	0.000410596	0.000135697	0.000571029	0.000368447	0.000309835	0.00020356	0.000193966	5.26434e-07	5.51428e-07	5.62557e-07	0.000443285	5.23565e-07	0.00108117	0.000501155	0.000727603	5.58016e-07	0.000648904	0.000840393	4.48005e-07	0.00111877	0.00046461	0.00213208	0.000452311	0.00130261	0.0014306	0.00131584	0.00024929		0.000418741	0.00029607	0.00104962
6	N<->D	1	0.0156475	0.0300201	0.031613	0.0377744	0.0353837	0.0355267	0.0261962	0.0316868	0.0170108	0.0226856	0.0188817	0.0351613	0.0246072	0.0265727	0.0282264	0.0308456	0.0278094	0.0359679	0.0334342	0.0283793	0.0276482	0.0319575	0.029174	0.0337385	0.0341584	0.0273363	0.0440248	0.0325949	0.0367018	0.0275082	0.0347071	0.0387807	0.0290927	0.0334411	0.0275612	0.0290488	0.0306647	0.0226566	0.0339917	0.0362547	0.0197011	0.00872803	0.0249411		0.0294847	0.0303029	0.0252769
7	A<->C	2	0.0292662	0.0200873	0.00967572	0.00561656	0.0199405	0.0276887	0.0152204	0.0100328	0.0143267	0.0291827	0.018338	0.00589759	0.0294936	0.0302029	0.0204177	0.0320757	0.0165081	0.00729067	0.0215217	0.0121267	0.0165549	0.0142177	0.0108417	0.0192269	0.0381821	0.0130775	0.0160478	0.0122522	0.0124125	0.00654078	0.0061763	0.00908969	0.0195657	0.0276909	0.0188758	0.00724065	0.0121257	0.00844618	0.0156912	0.0245337	0.019244	0.0260436	0.0191614		0.0173988	0.0173029	0.0178923
8	R<->C	1	0.00554778	0.0189832	0.00422655	0.0271177	0.00485638	0.00442497	0.00578641	0.0019189	0.00214574	0.00112324	0.00509664	0.00551992	0.00845313	0.00195363	0.00998752	0.00427295	0.00595752	0.00692714	0.000900619	0.00783346	0.0116874	0.0073996	0.00913859	0.0052963	0.0138871	0.00464136	0.001679	0.000746164	5.45832e-07	0.000680298	0.00365454	0.00263672	5.11645e-07	0.0114268	0.00132737	0.00420835	0.00435421	3.80709e-07	0.000118431	0.00224325	0.0023831	0.00708982	0.00861282		0.00549409	0.00587344	0.00354315
9	N<->C	2	0.00951346	4.35602e-07	0.0135189	0.00748424	0.00578589	0.015662	0.00702636	0.00012234	0.00632339	0.00135614	0.00162935	0.00162602	0.0142492	0.00921986	0.005843	0.00684652	0.00228988	0.00327492	0.00985783	5.83919e-07	0.0104771	4.50374e-07	0.00345972	5.26434e-07	5.51428e-07	0.00342366	0.0009509	0.00410873	0.00202304	0.00243396	0.0040771	0.00400201	0.00206355	0.0078727	0.0134989	0.00635871	0.00427056	3.80709e-07	0.0035846	2.75292e-07	0.00542658	0.0121791	0.0179875		0.00534491	0.00517728	0.00620701
10	D<->C	2	5.12055e-07	0.000500502	0.00439358	5.09653e-07	5.45162e-07	0.00233749	0.00106412	0.0209746	5.09728e-07	0.00859544	0.00192649	0.000651258	0.00219134	0.00266521	0.000875902	4.80209e-07	0.002634	5.61612e-07	0.00142441	5.83919e-07	0.00210544	4.50374e-07	5.20198e-07	0.0031628	5.51428e-07	0.00047023	0.0010274	5.23565e-07	5.45832e-07	0.000589999	5.81041e-07	5.58016e-07	5.11645e-07	4.29037e-07	4.48005e-07	0.00184286	5.28675e-07	0.00140565	0.000667012	2.75292e-07	1.71468e-07	0.00178451	4.84868e-07		0.00147211	0.00165116	0.000551234
11	A<->Q	2	0.00721348	0.0086619	0.00648044	0.00466117	0.00425261	0.00812262	0.00603854	0.0084256	0.00960011	0.0128246	0.00974062	0.00478083	0.0115791	0.00896869	0.00959399	0.00329107	0.00964092	0.00304466	0.00659463	0.00657363	0.00559449	0.00884136	0.00623742	0.00854996	0.00734382	0.00587514	0.00781527	0.00451686	0.00555944	0.00699179	0.00566392	0.00569286	0.00823223	0.0104957	0.0121617	0.00380807	0.00356951	0.00355051	0.00276037	0.00523409	0.00625015	0.00566486	0.00436465		0.00685729	0.00731859	0.00448488
12	R<->Q	1	0.00681641	0.00644366	0.00602472	0.00263972	0.00894789	0.00443564	0.00710351	0.0132482	0.0104408	0.00406798	0.00762889	0.00649797	0.00546591	0.00472778	0.00568442	0.00570397	0.00625181	0.00569399	0.00922307	0.00517807	0.0123153	0.00664935	0.0089235	0.00762102	0.00683878	0.0105107	0.00657793	0.00534739	0.00566363	0.00618743	0.0106383	0.00734421	0.00687576	0.0105726	0.00761731	0.0113134	0.00973301	0.0128753	0.00745953	0.00714838	0.00752013	0.0076733	0.00656258		0.00749287	0.00731169	0.00842461
13	N<->Q	2	0.0126077	0.00664301	0.0131379	0.00668431	0.00598345	0.0143234	0.0116333	0.00547446	0.0118571	0.0126565	0.0147531	0.00966447	0.0199511	0.0111341	0.010887	0.0107154	0.00602767	0.00991434	0.00640243	0.0118204	0.0161979	0.011417	0.00897672	0.0106964	0.00596294	0.00929549	0.011813	0.0103942	0.00553225	0.0167433	0.0126556	0.00939529	0.013591	0.0130248	0.0171316	0.0077577	0.00825049	0.00873307	0.0103735	0.0116195	0.0166184	0.0170606	0.00913554		0.0110383	0.0109127	0.0116844
14	D<->Q	2	0.00319854	0.0043373	0.00218445	0.00372551	0.00228529	0.0034077	0.00533893	0.00136625	0.00185136	0.00326831	0.00299614	0.00207455	0.00851143	0.00304136	0.00866469	0.00301604	0.00128235	0.00211687	0.0060809	0.00220151	0.00147464	0.00135144	0.00157108	0.00271368	0.00311801	0.00228954	0.00496092	0.00413481	0.00331812	0.0034101	0.00187535	0.000560957	0.00429619	4.29037e-07	0.000322223	0.00494158	0.00431796	0.00442133	0.00507344	0.00952758	0.00949369	0.00829131	0.00257895		0.00360448	0.00309135	0.00624347
15	C<->Q	3	5.12055e-07	4.35602e-07	0.00166219	0.000758863	0.00511992	0.00056461	0.000480598	4.33552e-07	0.004542	0.00238267	0.0031494	5.95066e-07	4.5246e-07	4.6429e-07	5.25524e-07	4.80209e-07	0.00338806	0.00193777	5.53505e-07	0.000513335	0.00509559	0.00115045	0.00474881	5.26434e-07	0.00119296	5.62557e-07	5.43381e-07	5.23565e-07	5.45832e-07	0.000121713	0.000196845	5.58016e-07	5.11645e-07	4.29037e-07	4.48005e-07	1.92647e-07	5.28675e-07	3.80709e-07	0.000987083	0.00145954	0.00146041	3.67699e-07	0.00336757		0.00103002	0.0010282	0.00103941
16	A<->E	1	0.0051778	0.00591212	0.00635298	0.00368136	0.00999527	0.00591498	0.00592729	0.00617334	0.00695984	0.0104558	0.00792938	0.00807337	0.0109401	0.00661361	0.00874589	0.00618665	0.00580015	0.0066326	0.00444881	0.0049595	0.00499881	0.00690151	0.00705309	0.00840707	0.00821303	0.00970997	0.00379015	0.00494666	0.00527587	0.00486846	0.00590617	0.00640849	0.00604857	0.00587896	0.00773124	0.00243727	0.00650833	0.00748288	0.00266652	0.00285901	0.00268369	0.00351263	0.007182		0.00624073	0.00654045	0.00469929
17	R<->E	2	0.000458709	0.000812676	1.98608e-05	5.09653e-07	0.000951689	0.000107381	5.33607e-07	6.17856e-05	0.000791613	0.000434209	0.000484657	5.95066e-07	0.000309397	0.000248934	0.000134266	0.000127865	0.000345109	8.89089e-05	5.53505e-07	5.83919e-07	4.67824e-07	0.000366659	9.29854e-05	5.26434e-07	0.000380921	5.62557e-07	0.000445447	9.3404e-05	0.000175911	0.000229985	0.00083344	5.58016e-07	3.1855e-05	0.000175918	0.000607625	0.000826927	0.00209427	0.00276312	0.000279409	0.00267654	0.000555284	0.00106904	0.000805711		0.000462474	0.000267862	0.00146334
18	N<->E	2	0.00219957	0.000924948	0.00617601	0.00239654	0.000730549	0.0034627	0.00115299	4.33552e-07	0.000909375	0.00424529	0.00153875	0.00296124	0.00245495	0.00463425	0.00556037	0.0047086	0.00376342	0.00432415	0.00348469	0.00366317	0.00185878	0.00413274	0.00340855	0.00194768	0.00167569	0.00436715	0.00507373	0.00224484	0.00382483	0.00186456	0.00285425	0.0056773	0.00389734	0.0062138	0.00349885	0.00741766	0.00368228	0.00275914	0.00512186	0.00568062	0.00295067	0.00609643	0.0036652		0.00346991	0.00331249	0.00427946
19	D<->E	1	0.0453247	0.0449842	0.0513546	0.0384789	0.045398	0.0519774	0.0341109	0.0651897	0.0412131	0.0578897	0.0449438	0.0434865	0.045102	0.0320107	0.0427823	0.04691	0.035452	0.0593751	0.033828	0.0437052	0.0372264	0.0350442	0.0353196	0.0383503	0.0356828	0.0377977	0.0335038	0.0369506	0.0402831	0.0350812	0.0410122	0.064661	0.0449671	0.0513613	0.0439204	0.0301482	0.0400201	0.034714	0.0314259	0.0268087	0.0378081	0.0439403	0.0395482		0.0418393	0.0429118	0.0363236
20	C<->E	3	5.12055e-07	4.35602e-07	4.47215e-07	5.09653e-07	5.45162e-07	4.57585e-07	5.33607e-07	0.000866892	5.09728e-07	0.000579655	4.50555e-07	0.000522813	4.5246e-07	4.6429e-07	5.25524e-07	4.80209e-07	5.12374e-07	5.61612e-07	0.000125435	5.83919e-07	4.67824e-07	0.000648584	5.20198e-07	5.26434e-07	5.51428e-07	5.62557e-07	5.43381e-07	0.000988758	5.45832e-07	5.70753e-07	0.000507912	5.58016e-07	5.11645e-07	0.00144561	4.48005e-07	1.92647e-07	5.28675e-07	3.80709e-07	4.82172e-07	2.75292e-07	0.000254455	3.67699e-07	4.84868e-07		0.000138526	0.000158323	3.67106e-05
21	Q<->E	1	0.0223292	0.0255654	0.0197218	0.0136778	0.0206891	0.0169049	0.0253649	0.0235278	0.0210048	0.0173952	0.0216489	0.0220736	0.0313038	0.0246776	0.0203774	0.0279211	0.0218144	0.0319362	0.0234292	0.0202252	0.0249131	0.0254622	0.0261103	0.0235702	0.018482	0.0266475	0.0180881	0.0276627	0.0315823	0.0275921	0.0273369	0.0336751	0.0268042	0.02843	0.0239877	0.0167706	0.0142648	0.0160983	0.0212994	0.021629	0.0208865	0.0183222	0.0222021		0.0231025	0.0238529	0.0192432
22	A<->G	1	0.00335028	0.00498561	0.00500862	0.00207741	0.00567139	0.00577908	0.00589203	0.00480019	0.00574985	0.00537891	0.00690534	0.00449301	0.00480977	0.00671161	0.00447385	0.00443905	0.00654976	0.0040702	0.00506307	0.00477695	0.00423034	0.00674357	0.00509406	0.00569179	0.0049527	0.00585077	0.00509448	0.00636958	0.00691978	0.00573109	0.00494985	0.00507616	0.00592314	0.00472507	0.0054563	0.00499212	0.00439491	0.00474405	0.00597683	0.00481856	0.00501844	0.00691431	0.00443739		0.00523468	0.00524408	0.00518636
23	R<->G	1	0.00086886	0.000301585	0.000213956	0.000613036	0.000765919	0.000488298	0.00078373	0.000287194	0.000417783	0.000323946	0.000349856	0.00109376	0.000280797	0.000447525	0.000545851	0.000298772	0.000770503	0.000737925	0.000675027	0.00073022	0.000908906	0.00156577	5.20198e-07	0.000357501	0.000830549	0.000756487	0.000940315	0.00063966	0.000738151	0.000773165	0.00111553	0.000933433	0.000402189	0.00120117	0.000569088	0.00288366	0.00147148	0.0025671	0.00146268	0.00180861	0.00224528	0.00104632	0.000475176		0.000853192	0.000711406	0.00158238
24	N<->G	2	0.00987303	0.00829195	0.00438104	0.00558155	0.0099356	0.0103338	0.00591015	0.00430069	0.00770626	0.00525733	0.00713785	0.0081324	0.0056856	0.00624103	0.00640686	0.00876104	0.00557949	0.00725889	0.00707523	0.00651671	0.0067517	0.00458006	0.00612113	0.00553124	0.00563639	0.00513014	0.0069966	0.00543502	0.0048198	0.00373211	0.00436877	0.0067408	0.00559754	0.00431239	0.00686499	0.0047996	0.00692613	0.00445142	0.00625225	0.00692142	0.00461926	0.00477968	0.00660501		0.00624046	0.00632735	0.0057936
25	D<->G	1	0.00479885	0.00579159	0.00482036	0.00220817	0.00355993	0.00268625	0.00326842	0.00557762	0.0038863	0.00359277	0.0035582	0.00291925	0.00427166	0.00305561	0.00394722	0.00305784	0.0029558	0.00234997	0.00346195	0.0045097	0.00291387	0.00357122	0.00404634	0.00426927	0.00287449	0.003752	0.00369734	0.00340688	0.00259602	0.00302745	0.00307594	0.0059924	0.00324105	0.00380559	0.002795	0.00595082	0.00344692	0.00771707	0.00318194	0.00330385	0.00640136	0.00642634	0.00216678		0.00385901	0.00370259	0.00466347
26	C<->G	1	0.00351555	0.00660065	0.00305403	0.00718365	0.00609514	0.00472962	0.00282925	4.33552e-07	0.000788238	4.21607e-07	4.50555e-07	0.00306024	0.00120673	4.6429e-07	0.000611137	4.80209e-07	0.00211514	0.00374935	0.00230176	5.83919e-07	4.67824e-07	0.000830562	0.000694449	0.00296233	0.00746506	0.002112	0.000974331	5.23565e-07	0.00531134	0.00250884	0.000451951	5.58016e-07	0.00322476	0.00234711	4.48005e-07	0.00469701	0.00270238	0.00415858	0.00129145	0.00219219	0.000323366	0.000427307	0.00375121		0.00223887	0.00226181	0.00212093
27	Q<->G	2	0.000592156	0.00147797	0.000532311	5.09653e-07	0.000489942	0.000736067	0.000931672	0.00119939	0.00297897	0.00160975	0.0027318	0.00110281	0.000215747	0.000889121	0.000478884	0.000836323	0.00136945	0.000760777	0.00219691	0.000749045	0.00145563	0.000801215	5.28521e-06	0.00138147	0.00145424	0.00153341	0.00137452	0.000564607	8.46968e-05	0.000680537	0.0013855	0.00184264	0.00123117	0.000673236	0.000184883	0.00315271	0.000827926	0.00165999	0.00133101	0.0021409	0.00159278	0.00396592	0.000761491		0.0012085	0.00110237	0.00175429
28	E<->G	1	0.000569006	0.00100258	0.000379247	0.00185282	0.0021747	0.00167366	0.000729867	4.33552e-07	0.000844997	0.000502754	0.00108061	0.00139871	0.000417322	0.00107121	0.000538762	0.000596722	0.00157219	0.000601453	0.000920152	0.00122367	0.000671458	0.00218268	0.00307941	0.0008226	0.0011842	0.00116628	0.00140068	0.00109071	0.00258125	0.000727453	0.00223672	0.00110996	0.000766101	0.00142586	0.000658362	0.00335027	0.0016982	0.00221823	0.00105597	0.00173026	0.00201434	0.00298079	0.000786883		0.00130441	0.00121125	0.00178352
29	A<->H	2	0.00470573	0.00502058	4.47215e-07	5.09653e-07	0.0012349	0.000867806	0.00178838	0.00112705	0.00321163	0.00277009	0.00118609	0.00327192	0.0026674	0.00213822	0.002772	0.000823261	0.00266814	0.00154214	0.00273165	0.00231189	0.00197353	0.00110882	0.000512962	0.00114714	0.00185518	0.000577746	0.00102611	0.00186231	0.00227605	0.00362464	0.00123106	0.00175953	0.00272486	0.00115482	0.00125838	0.00201348	0.00331914	0.00213359	0.00287086	0.00170404	0.0024012	0.00408218	0.00358204		0.00207069	0.00191518	0.00287044
30	R<->H	1	0.00753294	0.00284157	0.00217499	0.00921714	0.00527139	0.00241297	0.00646016	0.0036138	0.00888167	0.0042187	0.00509079	0.00783222	0.0051958	0.00673347	0.011312	0.00380321	0.0100551	0.00754965	0.00897648	0.0111744	0.00834942	0.00980569	0.00674783	0.0114606	0.00852864	0.00629163	0.00784951	0.00938647	0.00950373	0.0122615	0.0131367	0.00242384	0.00389887	0.00778372	0.00495658	0.00396932	0.0071645	0.0103952	0.00786859	0.00720556	0.00834327	0.00375481	0.00642199		0.00715945	0.00713062	0.0073077
31	N<->H	1	0.0274907	0.0111068	0.024796	0.02287	0.0274856	0.0271466	0.0169415	0.0248674	0.0221994	0.0190737	0.0136906	0.0208649	0.0239706	0.0189919	0.0205873	0.0197792	0.0225303	0.0240073	0.024063	0.0131501	0.02138	0.023251	0.0171654	0.0251213	0.0191361	0.0159678	0.0215788	0.019394	0.0186709	0.0217777	0.0230631	0.0164022	0.02558	0.0258826	0.030842	0.00902209	0.0203719	0.00997372	0.022064	0.00958837	0.012935	0.0103535	0.0243609		0.0202208	0.0211069	0.0156639
32	D<->H	1	0.00198351	0.000788086	4.47215e-07	0.00251067	0.00177969	4.57585e-07	0.00335367	0.00146563	0.000571211	0.000735721	0.0010663	0.00259709	0.000300425	0.00243772	0.00102837	0.00239013	0.00334993	0.000786943	0.00132487	0.000835278	0.00347823	0.00138382	0.0078316	0.00584221	0.00239844	0.0019604	0.00275095	0.00613846	0.00243078	0.00292913	0.00249667	0.00461784	0.000587511	0.00270457	0.00159053	0.00494227	0.00222667	0.00502291	4.82172e-07	0.00120237	0.00392492	0.000616919	0.00154146		0.00227733	0.00231638	0.00207653
33	C<->H	2	5.12055e-07	0.0175025	4.47215e-07	0.0109563	0.00147702	4.57585e-07	0.00247673	4.33552e-07	5.09728e-07	0.00245734	0.00658972	0.00172112	0.00917416	0.000493234	0.000401726	4.80209e-07	0.00650893	0.00652844	0.00423274	5.83919e-07	0.00942315	0.00766546	0.00241623	0.00145993	5.51428e-07	0.0110459	5.43381e-07	0.00580854	5.45832e-07	5.70753e-07	0.00625625	0.00428723	0.00187019	0.0101598	4.48005e-07	1.92647e-07	5.28675e-07	3.80709e-07	0.000604002	2.75292e-07	0.000863014	0.000990667	0.00994008		0.00333297	0.00363664	0.00177128
34	Q<->H	1	0.0192304	0.0178308	0.0218373	0.0364935	0.0184193	0.0195956	0.0229701	0.014119	0.0287316	0.022982	0.0267371	0.0239739	0.0215365	0.0231714	0.0255132	0.0170404	0.0233986	0.0272892	0.0288455	0.0185236	0.0184285	0.012618	0.0165862	0.0169729	0.0100375	0.0178655	0.0251057	0.0264739	0.0202333	0.0284949	0.0254004	0.0248352	0.0282689	0.0180177	0.0135239	0.0163819	0.0235437	0.0166386	0.0250495	0.0129994	0.0127855	0.0129043	0.0243713		0.0210645	0.0215968	0.0183275
35	E<->H	2	0.00239956	4.35602e-07	0.000862605	0.000485256	0.000943555	0.000291331	0.000685204	4.33552e-07	0.000169663	4.21607e-07	4.50555e-07	0.000637143	4.5246e-07	0.000411152	5.54428e-06	4.80209e-07	5.12374e-07	0.000693159	0.000482263	0.000911935	0.00033731	0.00132417	5.20198e-07	0.000800732	0.00145622	0.000129951	5.43381e-07	5.23565e-07	0.00122436	0.00138987	0.000562628	0.00100013	5.11645e-07	0.00187502	0.000909984	0.00312353	0.00200204	0.00384219	0.00097432	0.00119854	0.000762993	0.00263746	0.00164338		0.00084136	0.000642154	0.00186585
36	G<->H	2	0.00122728	0.00172211	4.47215e-07	5.09653e-07	5.45162e-07	4.57585e-07	0.000482823	0.000378868	0.000230973	0.000402335	0.000668768	0.000627699	0.000407825	0.000745019	0.000623834	4.80209e-07	0.00120384	0.000662394	0.00179538	0.00170646	0.000575217	0.00110483	0.000476564	0.00102861	0.000668634	0.00128177	0.00191324	0.0012891	0.00183387	0.0030329	0.00144968	0.000104773	0.000414841	0.000447854	4.48005e-07	0.00172151	0.00100075	0.00181147	0.00204421	0.000802976	0.00251411	0.00212424	0.000836204		0.000961996	0.000839774	0.00159057
37	A<->I	2	0.0011803	4.35602e-07	4.47215e-07	0.00172304	2.60424e-05	4.57585e-07	5.33607e-07	1.10426e-05	0.000220366	0.00134859	2.14554e-05	5.95066e-07	0.000166809	4.6429e-07	5.25524e-07	7.9052e-05	1.90859e-05	5.61612e-07	5.53505e-07	5.83919e-07	0.000532416	0.000168476	0.000923497	4.09355e-05	5.51428e-07	6.9037e-05	0.000617721	0.000438224	5.45832e-07	0.0002099	5.81041e-07	5.58016e-07	5.11645e-07	4.29037e-07	1.12091e-05	0.00392133	5.28675e-07	0.000608392	0.000172608	0.000712721	0.000570252	0.00260977	0.000139414		0.000384896	0.000326024	0.000687669
38	R<->I	1	5.12055e-07	0.000387877	4.47215e-07	0.000142025	7.04567e-05	2.04083e-06	0.000443875	4.33552e-07	0.000377596	0.000305901	8.31409e-05	0.000738209	0.00014229	0.000563226	0.000144172	0.000310431	0.000667972	5.61612e-07	0.00118652	0.000632962	0.00030263	4.50374e-07	0.000205905	0.000296909	0.000356046	0.000882258	0.000394337	0.00102651	0.000656772	0.000574663	0.000162785	0.000636278	0.000498454	0.000638741	0.000242071	0.00204921	0.000419392	0.000515701	0.00110906	0.000589027	0.000593789	0.000846926	0.000958837		0.000468777	0.00042013	0.000718961
39	N<->I	1	5.12055e-07	0.00230469	0.000143489	0.000569308	5.45162e-07	0.0001779	0.000920114	0.00048022	0.000310919	0.000963924	0.000442522	0.000914206	0.00045855	0.000799192	0.00115904	0.000561571	0.000791315	0.000135725	0.00125542	0.001816	0.00229645	0.000827702	0.000571661	0.000579467	0.00107737	0.00129645	0.00108368	0.00224226	0.00102521	5.70753e-07	0.000875478	0.00179955	0.000630935	0.000910394	0.000114712	0.00324726	0.000526037	0.000163347	0.000328711	1.10309e-05	0.00080316	0.000160644	4.84868e-07		0.000808785	0.000910676	0.000284773
40	D<->I	2	5.12055e-07	4.35602e-07	4.47215e-07	5.09653e-07	5.45162e-07	4.57585e-07	5.33607e-07	4.33552e-07	5.09728e-07	4.21607e-07	4.50555e-07	2.30588e-05	4.5246e-07	9.3861e-05	5.25524e-07	4.80209e-07	0.000245294	0.00017866	5.53505e-07	5.83919e-07	4.67824e-07	4.50374e-07	5.20198e-07	5.26434e-07	5.51428e-07	0.000204456	5.43381e-07	5.23565e-07	5.45832e-07	0.000354963	4.17013e-05	5.58016e-07	5.11645e-07	4.29037e-07	4.48005e-07	0.000770406	0.000508104	0.000177342	4.82172e-07	0.000170166	0.00209832	3.67699e-07	4.84868e-07		0.000113525	5.35091e-05	0.00042218
41	C<->I	2	0.00426077	0.00776137	4.47215e-07	5.09653e-07	5.45162e-07	4.57585e-07	0.000710124	4.33552e-07	0.000480633	0.00128995	0.00433075	0.00102049	0.0015064	0.00149907	5.25524e-07	4.80209e-07	5.12374e-07	0.0014868	5.53505e-07	5.83919e-07	0.000492267	4.50374e-07	5.20198e-07	0.00214279	0.00543371	5.62557e-07	5.43381e-07	5.23565e-07	5.45832e-07	0.000487674	0.000339799	5.58016e-07	0.00134324	0.000341573	4.48005e-07	0.0058641	5.28675e-07	3.80709e-07	0.00190467	0.00709792	0.00427242	3.67699e-07	4.84868e-07		0.00125762	0.00113335	0.00189668
42	Q<->I	2	0.000612838	4.35602e-07	0.000737828	0.00147543	0.000614381	4.57585e-07	0.000752407	0.00222871	0.00189017	0.00165117	0.00112295	0.000479897	8.96414e-05	0.000140773	0.00042424	0.00273392	0.0012342	0.000986394	0.00142626	0.000185908	0.000903816	0.000649638	0.00072937	0.00104892	0.000647509	0.000760892	5.43381e-07	5.23565e-07	0.000993507	0.000836479	0.000490219	0.00130424	0.00114114	0.00036396	0.000625322	0.00195228	0.000431176	0.00114299	0.00110819	0.00208323	0.00154177	0.001703	0.000507483		0.000924516	0.000867676	0.00121684
43	E<->I	2	6.22915e-05	0.000250737	4.47215e-07	0.00037169	5.45162e-07	4.57585e-07	5.33607e-07	4.33552e-07	5.09728e-07	4.21607e-07	0.000187688	5.55732e-05	4.5246e-07	4.6429e-07	0.000193009	0.000567439	0.000235021	5.61612e-07	0.000776241	5.83919e-07	0.000436568	4.50374e-07	0.000151674	0.000589179	2.63803e-05	0.000102627	5.43381e-07	0.000484366	0.00113528	0.000806902	0.000224962	0.00145575	2.60529e-05	0.000634318	4.48005e-07	0.00167363	0.000394296	2.24847e-05	0.000967015	0.00118519	0.00292335	0.0020124	0.000202117		0.000422351	0.000290395	0.00110098
44	G<->I	2	9.95333e-05	0.000129017	4.47215e-07	2.60535e-05	5.45162e-07	4.57585e-07	1.29773e-05	4.33552e-07	4.38111e-05	4.21607e-07	7.52877e-06	5.95066e-07	4.5246e-07	0.00012696	5.17221e-05	0.000554939	7.54573e-05	3.49604e-05	5.53505e-07	9.11497e-06	4.67824e-07	4.50374e-07	2.96149e-05	5.26434e-07	5.51428e-07	5.62557e-07	5.43381e-07	5.23565e-07	5.45832e-07	5.70753e-07	5.81041e-07	5.58016e-07	5.96833e-05	4.29037e-07	4.48005e-07	0.000255486	0.000386683	0.000490787	4.82172e-07	0.000300442	0.00131958	0.00118063	4.84868e-07		0.000121084	4.24312e-05	0.000525585
45	H<->I	2	0.00115706	0.000158402	4.47215e-07	5.09653e-07	5.45162e-07	4.57585e-07	5.33607e-07	0.000475455	0.00100724	0.000952541	0.0010254	0.000329143	4.5246e-07	0.00024632	0.00122712	4.80209e-07	0.000211728	0.000158217	5.53505e-07	5.83919e-07	0.000249654	0.000365217	1.0586e-05	0.000251635	0.00101876	6.09193e-05	5.90546e-05	0.00137009	0.00066186	0.00115453	0.000789048	0.000489469	5.11645e-07	0.00151349	4.48005e-07	0.000707208	5.28675e-07	0.00108465	4.82172e-07	0.000778208	0.000933504	0.00167055	0.00125055		0.000497073	0.000434879	0.000816924
46	A<->L	2	0.00124795	0.00245521	0.000158904	0.000383397	0.0010226	0.000782228	0.0016742	0.00157208	0.00158349	0.00159641	0.00158776	0.000868207	0.000963442	0.00145936	0.000995979	0.000432716	0.00133473	0.00177086	0.00189323	0.00186721	0.00125021	0.00193203	0.00122924	0.00229255	0.00218108	0.00189026	0.00188156	0.00272272	0.0020376	0.00142658	0.000843219	0.00066602	0.000645153	0.00115003	0.00182475	0.00199841	0.00123514	0.00253353	0.00195569	0.0020597	0.000518294	0.0025791	0.00162056		0.00149124	0.00143393	0.001786
47	R<->L	1	0.000993971	0.00160352	0.000440556	0.00106496	0.00105023	0.000608218	0.00129568	0.000167369	0.0011865	0.000806462	0.00173423	0.00104378	0.000811813	0.000864769	0.00106	0.00110901	0.000810447	0.00142398	0.00158917	0.000499315	0.00144338	0.000990823	0.000453451	0.0017465	0.0016613	0.000732325	0.000681785	0.000547157	0.000827722	0.000603794	0.00169804	0.000860589	0.000510023	0.000861591	0.00199622	0.00265371	0.00162132	0.000936068	0.00066612	0.00172731	0.00224901	0.00174397	0.00176095		0.00114272	0.00106757	0.00152925
48	N<->L	2	0.00109451	0.00146557	0.000108991	0.000542261	0.000792425	0.00195922	0.000693129	0.000435638	0.00159742	0.00134961	0.00111478	0.000462503	0.001297	0.00100163	0.00111752	0.0010128	0.0015271	3.49548e-05	0.00183054	0.000333704	0.00064984	0.000923168	0.000903324	0.000837651	4.30224e-05	0.00108268	0.00126104	0.00147591	0.000414172	0.00130275	0.000348869	0.00183423	0.00074806	0.000967332	0.00125603	0.000883133	0.000997117	0.00106468	0.00309855	0.00185363	0.00141896	0.00124311	0.00191431		0.00107658	0.000963959	0.00165577
49	D<->L	2	0.000407714	7.27716e-05	0.00038774	0.000250938	0.000358068	0.000165568	5.33607e-07	0.00107068	7.46752e-05	4.21607e-07	0.000364625	0.000137407	0.000270436	3.10703e-05	5.25524e-07	3.16218e-05	5.12374e-07	5.61612e-07	8.3214e-05	0.000163071	4.67824e-07	0.00116052	0.000591013	0.000107898	8.72028e-05	5.62557e-07	5.43381e-07	0.000540806	0.000191647	5.70753e-07	5.81041e-07	0.000303181	5.11645e-07	4.29037e-07	4.48005e-07	0.000480794	0.000617978	0.000327505	0.000314207	0.000851523	0.00043649	0.00633009	0.000223825		0.000382348	0.00020387	0.00130023
50	C<->L	2	0.00472248	0.00231335	0.000449115	0.00717368	0.00181114	0.00114138	0.00193159	0.00173953	0.00151771	0.00180259	0.00187945	5.95066e-07	0.0042992	0.00220373	0.00287501	4.80209e-07	5.12374e-07	0.000803089	0.000112096	5.83919e-07	0.00598215	0.0023544	0.00306035	0.00225278	0.00124456	0.000838198	0.00210639	5.23565e-07	5.45832e-07	0.00049748	5.81041e-07	0.00077557	5.11645e-07	0.00118544	4.48005e-07	0.00412122	0.00207026	0.0061905	0.00190052	0.00212649	0.00443852	0.00215203	0.00503773		0.00197941	0.00169996	0.00341658
51	Q<->L	1	0.00988686	0.00615526	0.00657346	0.00368834	0.00636515	0.00614887	0.00595227	0.00825403	0.00420024	0.00602073	0.00522096	0.00424841	0.00563009	0.00632443	0.00343068	0.00532778	0.00293131	0.00425765	0.00891017	0.00351118	0.00539777	0.00444031	0.00610667	0.00714277	0.00452987	0.0061721	0.00643128	0.00565627	0.00551931	0.00411012	0.00888203	0.00514548	0.00505792	0.00673705	0.00570963	0.00510585	0.00527561	0.00340447	0.00173523	0.00299436	0.0059069	0.00507103	0.00451755		0.00544389	0.00569951	0.00412931
52	E<->L	2	0.000655042	0.000831276	4.47215e-07	5.09653e-07	0.00020793	0.000618957	0.000338926	0.000265802	0.000647242	0.000335346	0.000206859	0.000702017	0.000379406	0.000682925	0.00047675	0.000153734	0.000652426	0.000422074	0.00074064	0.000392785	0.00105578	0.0014673	0.000876924	0.000793115	0.000492811	0.000590955	0.00142718	0.000301039	0.000379053	0.000715097	0.000451202	0.000300715	0.000645583	0.000873128	0.000102392	0.000779927	0.000769486	0.000616604	0.00163932	0.00112012	0.00102991	0.000661065	0.00068477		0.00061592	0.000554536	0.00093161
53	G<->L	2	5.12055e-07	4.35602e-07	0.000392033	0.000386434	5.45162e-07	0.000334513	5.33607e-07	0.000321124	5.09728e-07	0.000116498	0.000157717	5.46925e-05	4.5246e-07	4.6429e-07	0.000148524	4.80209e-07	5.12374e-07	0.000151686	4.4928e-05	5.83919e-07	0.00016058	0.000152623	5.20198e-07	0.000166716	0.000181205	0.000138451	0.000130102	5.23565e-07	5.45832e-07	0.000253158	0.000171948	8.73407e-05	5.11645e-07	3.34305e-05	5.96654e-05	0.000330154	5.28675e-07	8.12928e-05	6.34201e-05	0.000527376	0.000819442	0.00159888	8.76642e-05		0.000166494	0.000110574	0.000454087
54	H<->L	1	5.12055e-07	0.00224346	0.0038211	5.09653e-07	0.00200171	0.00280694	0.00152238	0.000387977	0.00142012	0.00324694	0.00108222	0.0036077	0.000291914	0.0018347	0.00048231	0.00100796	0.00258429	0.00237719	0.00315652	0.0027005	0.00267886	0.00137793	0.00238394	0.00147249	0.00169768	0.00113379	0.00260463	0.00397702	0.000862	0.00220353	0.00184334	0.00154053	0.000934647	0.00236828	0.00115663	0.00188161	0.00251381	0.00693517	0.0012668	0.00225185	0.0024697	0.0019662	0.00262126		0.00201671	0.00185261	0.00286068
55	I<->L	1	0.0235234	0.0209524	0.0241905	0.0228647	0.0234325	0.0215183	0.0217065	0.0190805	0.0241841	0.0258497	0.0280648	0.025137	0.0201395	0.0217425	0.0175364	0.0225645	0.0217579	0.0229786	0.0300641	0.0248303	0.0302436	0.0278862	0.0237329	0.0266471	0.0287054	0.0239916	0.0293094	0.0250578	0.0229133	0.0255987	0.01972	0.021996	0.0267118	0.0179144	0.0205508	0.0146762	0.0227482	0.0293808	0.0231642	0.0182369	0.0181707	0.0202571	0.0248972		0.0233635	0.0235493	0.0224079
56	A<->K	2	0.0031926	0.00258104	0.00249982	0.000352512	0.00222651	0.00255419	0.00176537	0.00147389	0.00385153	0.00390452	0.00278819	0.0014106	0.00104521	0.00212244	0.00348728	0.00151999	0.00203301	0.0025728	0.00209897	0.00173949	0.00320182	0.00331198	0.00376982	0.00366501	0.00350767	0.00196789	0.00269229	0.00270137	0.0025337	0.00239731	0.00148931	0.00167124	0.0025387	0.00242023	0.0022658	0.00214174	0.00179534	0.00327104	0.00200357	0.00225387	0.00246447	0.00387204	0.00265779		0.00246079	0.00243044	0.00261688
57	R<->K	1	0.0129836	0.0138685	0.0134721	0.00732448	0.0179604	0.00924555	0.015623	0.0128762	0.0150826	0.0146102	0.0135557	0.0225963	0.0141428	0.0167116	0.0136204	0.0140651	0.0161607	0.0176593	0.0146483	0.0169016	0.0102986	0.0144291	0.0183138	0.0126544	0.011726	0.0162564	0.0162435	0.0157934	0.019511	0.0148804	0.0190404	0.0204439	0.0184742	0.0140651	0.0170788	0.0180133	0.024631	0.0173785	0.015185	0.0218562	0.0170008	0.0137295	0.0150328		0.015701	0.015287	0.0178305
58	N<->K	1	0.00629235	0.00793958	0.0100787	0.0140783	0.0063583	0.00945666	0.00870879	0.00571435	0.006468	0.00981979	0.0067526	0.0102757	0.0119537	0.0112569	0.0114637	0.0141464	0.00890806	0.0130213	0.010702	0.00836555	0.00768613	0.00844372	0.00872773	0.00997607	0.00642518	0.0101112	0.0139419	0.010542	0.0123348	0.0103691	0.0096637	0.012232	0.0111762	0.00870285	0.0117193	0.0100543	0.0120369	0.007544	0.00915015	0.0063306	0.00648546	0.00659463	0.00695551		0.0095108	0.00982964	0.00787104
59	D<->K	2	0.00272823	0.000127257	8.49261e-06	0.00142265	0.000223451	0.000157949	0.000629325	0.000204229	0.00039011	0.000274091	0.000320245	0.000426383	0.00080618	0.000605435	0.000566378	0.000322782	0.000487037	0.000546488	0.00158232	0.000530017	6.19539e-05	0.00156535	0.00124633	2.02151e-05	0.000109844	0.000598476	0.00122386	0.000277961	0.000901147	0.000622743	0.0012046	0.000655602	0.000576772	0.000927659	0.000136221	0.00626656	0.00296693	0.00292422	0.00192305	0.0039026	0.00529554	0.00527601	0.00120419		0.00121504	0.000798732	0.00335608
60	C<->K	3	0.0018673	0.000830706	0.000409845	0.00212699	0.000585286	4.57585e-07	0.000217327	0.00137343	0.000478232	4.21607e-07	4.50555e-07	5.95066e-07	4.5246e-07	0.000263369	5.25524e-07	4.80209e-07	3.99395e-05	5.61612e-07	5.53505e-07	5.83919e-07	0.000176369	4.50374e-07	0.000216418	5.26434e-07	0.00098501	5.62557e-07	5.43381e-07	5.23565e-07	8.51498e-07	0.00011011	5.81041e-07	5.58016e-07	5.11645e-07	4.29037e-07	4.48005e-07	0.0010979	0.00290092	0.00711071	4.82172e-07	0.0012394	0.00184653	0.00390212	4.84868e-07		0.000646278	0.000299703	0.00242866
61	Q<->K	1	0.0126971	0.0146834	0.0138743	0.0166006	0.0164596	0.0143217	0.0135825	0.0103818	0.0109092	0.0128404	0.0108039	0.0105428	0.0186765	0.0120522	0.0155123	0.0208342	0.00977031	0.0216921	0.012925	0.0118542	0.0114113	0.0128331	0.012587	0.0148237	0.0100922	0.015376	0.00988539	0.0140877	0.0119813	0.0105627	0.0142207	0.013923	0.015664	0.01295	0.0127716	0.014665	0.0112306	0.0162272	0.0137236	0.0146608	0.00842272	0.0093377	0.0139133		0.0134038	0.0135791	0.0125023
62	E<->K	1	0.00415342	0.00208515	0.00246219	0.00472186	0.00257992	0.00244006	0.00267685	0.00193851	0.00233469	0.00111048	0.0028273	0.0033442	0.0012557	0.00269391	0.00422647	0.00177612	0.00384728	0.00261455	0.00499603	0.00369887	0.00370556	0.00380091	0.0060977	0.00403905	0.00326675	0.00576466	0.0046127	0.0052649	0.00524895	0.00363491	0.00434266	0.00523936	0.00256799	0.00439249	0.00122911	0.00870469	0.00584162	0.0055612	0.00699459	0.0064107	0.00637035	0.00438487	0.00279547		0.00390825	0.00360267	0.00547983
63	G<->K	2	0.000806477	0.00070561	0.000626959	0.000501769	0.000899484	0.000158082	0.000700199	0.000111002	0.000991487	0.000586228	0.000614386	0.000788516	0.000505059	0.00103088	0.000505008	0.000186758	0.000933253	0.000595904	0.000955034	0.00112879	0.00082583	0.00143506	0.0012403	0.0010122	0.00133715	0.000824534	0.00105357	0.00102668	0.000801238	0.000949648	0.00102659	0.000429628	0.00051783	0.000438089	0.000823246	0.0025238	0.00100272	0.00191476	0.00195494	0.00133857	0.00155798	0.00179973	0.00109117		0.000936189	0.000822118	0.00152284
64	H<->K	2	0.00210041	0.00515935	0.00359377	0.00334617	0.00481052	0.00119646	0.00291077	0.00495767	0.00404401	0.00610733	0.00176037	0.00241399	0.00297185	0.00296814	0.00443939	0.00249868	0.00402663	0.00319404	0.0019251	0.00322292	0.00440489	0.00401439	0.00168636	0.00271776	0.00341687	0.00191024	0.00201107	0.00238448	0.00215461	0.00544286	0.00285691	0.00219643	0.00131819	0.00509677	0.00241408	0.00558824	0.00679271	0.0042302	0.00477139	0.00618626	0.00593902	0.00700399	0.00264951		0.00360081	0.00325727	0.00536758
65	I<->K	1	0.000973622	0.00121643	0.000105914	0.00072227	0.000464827	0.000118382	0.000315271	0.000513591	0.00066203	0.000719611	0.000246008	0.000490424	0.00013853	0.000332446	0.000192347	0.000568217	0.000337485	5.61612e-07	0.000946842	0.000347461	0.0003344	0.0011228	0.000851491	0.000719477	6.3938e-05	0.000654816	0.000473937	0.00118475	0.00112513	0.00138906	0.000264066	0.000802299	0.00192549	0.000568529	0.000487484	0.00266526	9.94384e-05	0.000805272	0.000694395	0.00171644	0.00120583	0.00117637	0.0002166		0.000696734	0.000667922	0.000844907
66	L<->K	2	0.000633545	0.00110967	0.000565592	0.000510846	0.000532105	0.00066397	0.000426752	0.000796375	0.00054624	0.000574625	0.00102519	0.000354368	0.000977631	0.00146619	0.000973723	0.00073338	0.000447933	0.00107107	0.00110466	0.000834467	0.00132185	0.00151994	0.00043409	0.000660458	0.00105477	0.00106491	0.00137678	0.00071041	0.00149909	0.000944203	0.000403371	0.000796127	0.000844904	0.000859313	0.00110706	0.00274102	0.00185821	0.00232861	0.0016098	0.0014036	0.00220768	0.00177772	0.00119204		0.00104801	0.000907962	0.00176824
67	A<->M	2	0.00646045	0.00263556	0.00248626	0.00156313	0.00443255	0.0020983	0.00304384	0.000941169	0.00324171	0.00325604	0.00264672	0.00339941	0.00279454	0.00333849	0.0013985	0.00248539	0.0049042	0.00247896	0.00406209	0.00905632	0.00415166	0.00479316	0.00653505	0.0061161	0.00559214	0.00587035	0.00424411	0.00362472	0.00511588	0.00336516	0.00187113	0.00363657	0.00220366	0.00396864	0.00418115	0.00609004	0.00309176	0.0012163	0.00319327	0.00530229	0.00303371	0.00345583	0.00541615		0.00378587	0.00383564	0.0035299
68	R<->M	1	0.00199011	0.000849964	4.47215e-07	5.09653e-07	0.00099987	0.000643291	0.00191297	0.00235664	0.00104667	0.00103468	0.00137262	0.00338036	0.000497213	0.00152435	0.00146866	0.000464732	0.00268622	0.000507164	0.00239813	0.00232733	0.000758847	0.00260191	0.00136799	0.00179544	0.00154795	0.00175254	0.00316455	0.00138292	0.00171973	0.00311106	0.00107739	0.00267251	0.00141625	0.00105194	0.000127655	0.00458512	0.00156221	0.00166679	0.0033658	0.00237221	0.00220084	0.00123279	0.00239225		0.00168346	0.00159988	0.00211327
69	N<->M	2	0.00208941	0.000990519	0.00482708	0.00121056	0.000682848	0.000581906	0.0017681	4.33552e-07	0.00365014	0.00293479	0.00131849	0.000963025	0.00288896	0.00251837	0.00244705	0.00223532	0.000617006	0.00298413	0.00485422	0.00362329	0.00124563	0.000870812	0.00173572	0.00209388	0.00639305	0.00136839	0.00572472	1.9529e-06	0.0062667	0.00303965	0.00247427	0.00197868	0.00283074	0.000906293	0.0043781	0.00721194	0.00212193	0.00153834	0.000374117	0.000526145	0.00118895	3.67699e-07	0.00329936		0.00234315	0.00254739	0.00129274
70	D<->M	3	0.000251972	4.35602e-07	0.000187486	5.09653e-07	0.000913702	4.57585e-07	0.000655893	0.00104046	5.09728e-07	0.000831324	4.50555e-07	5.95066e-07	4.5246e-07	9.83367e-06	5.25524e-07	0.000366678	0.00035259	0.000376471	0.000847184	0.000232055	8.21171e-05	0.000497299	5.20198e-07	0.000296356	0.00118539	0.000157859	0.000883043	0.00121181	5.45832e-07	5.70753e-07	0.000201308	5.58016e-07	5.11645e-07	0.000824694	4.48005e-07	0.0049022	5.28675e-07	3.80709e-07	4.82172e-07	0.000646071	0.00120408	0.00245654	4.84868e-07		0.000479614	0.000453189	0.000615511
71	C<->M	3	0.00323004	4.35602e-07	0.00299349	5.09653e-07	5.45162e-07	4.57585e-07	0.00100873	4.33552e-07	0.00140105	4.21607e-07	0.0104829	0.00188398	4.5246e-07	0.00322692	0.000745204	4.80209e-07	0.0032268	5.61612e-07	0.00336457	5.83919e-07	0.0019097	4.50374e-07	0.00754769	0.00124678	0.01874	5.62557e-07	0.00499267	5.23565e-07	5.45832e-07	5.70753e-07	0.000760566	5.58016e-07	0.00188841	0.000921759	4.48005e-07	0.00472514	5.28675e-07	3.80709e-07	0.000562453	0.00288267	0.00413497	0.0116713	0.00650671		0.00232707	0.00206403	0.00367986
72	Q<->M	2	0.00856508	0.00558909	0.0171282	0.00239321	0.00884166	0.0135446	0.0127026	0.0129761	0.0111176	0.017181	0.0105205	0.0119735	0.0120295	0.00889136	0.0143398	0.0127323	0.0115055	0.00536067	0.0107708	0.0051757	0.0126615	0.00231421	0.00627042	0.0100974	0.0125021	0.0124403	0.0109717	0.0153776	0.0128354	0.0153729	0.00510974	0.0111019	0.0111511	0.0107353	0.0157093	0.00519299	0.00915764	0.00633509	0.0106027	0.005603	0.01003	0.0140884	0.0123002		0.0104953	0.010644	0.00973099
73	E<->M	2	0.000959218	0.00167273	0.000232198	0.00543161	5.45162e-07	0.00218166	0.000830442	4.33552e-07	6.94148e-05	0.000438711	0.0007046	0.000593644	0.00196776	0.00111578	0.00120194	0.0010369	0.00168067	5.61612e-07	0.00157727	0.000516032	0.000241645	0.000661041	0.000631375	5.26434e-07	0.00054341	0.000939537	0.000286688	5.23565e-07	0.0014067	0.00346182	0.000662585	0.000295949	0.000202565	0.000940568	0.000263808	0.00103301	3.70072e-05	0.00152877	0.00248067	0.000931628	0.00142432	0.00249706	0.000684809		0.00100856	0.000938441	0.00136918
74	G<->M	2	0.000322451	0.000269664	0.000460779	5.09653e-07	0.000153703	0.000355589	0.000422211	4.33552e-07	0.000570432	4.21607e-07	0.000224633	1.99942e-06	4.5246e-07	0.000156197	0.000613718	4.80209e-07	0.000449998	0.00106752	0.00102949	0.000328758	0.000252891	0.00142081	5.20198e-07	5.26434e-07	0.000296051	0.000458062	0.000340879	0.000254322	9.77203e-05	0.00013726	0.000381233	0.000419444	0.000184259	4.29037e-07	0.000166327	0.00150618	0.000266954	0.00204737	0.000293508	0.000564045	9.61951e-05	0.00010436	0.000418024		0.000375274	0.000342954	0.000541494
75	H<->M	3	0.00221362	0.00176218	0.00271768	0.000956624	0.00114158	4.57585e-07	0.00285939	4.33552e-07	0.00373737	0.00134259	0.000660856	0.00130555	0.000930738	0.00113716	0.00130551	4.80209e-07	0.000812005	0.000525692	0.00158938	0.00245449	0.000178657	0.00167455	5.20198e-07	0.00195585	0.0050446	0.00511582	5.43381e-07	5.23565e-07	0.00177394	5.70753e-07	0.00029862	0.000735599	1.82708e-05	0.00280589	0.00393775	0.00256171	0.00357187	3.80709e-07	0.00650409	0.00138585	0.00510339	0.00267905	0.00226129		0.00174565	0.0014877	0.00307227
76	I<->M	1	0.00639333	0.0106556	0.0124146	0.02504	0.012244	0.0111445	0.01276	0.00251482	0.00952277	0.0124935	0.0109322	0.0191652	0.00718681	0.0114241	0.0123301	0.00930667	0.0137365	0.0101844	0.0132577	0.018025	0.0153753	0.0207036	0.015305	0.0130205	0.0122184	0.0146072	0.0140526	0.0145048	0.0150372	0.0158382	0.0137134	0.015234	0.0135303	0.0123377	0.0113213	0.0103252	0.0158216	0.00646595	0.0136452	0.0108729	0.0150032	0.00607672	0.0110757		0.0127167	0.012996	0.0112802
77	L<->M	1	0.0283503	0.023621	0.0359088	0.0241076	0.0285305	0.0306341	0.0273112	0.0422109	0.0320633	0.0385009	0.0352185	0.0298623	0.0353731	0.0293333	0.0281607	0.025823	0.0295809	0.0241677	0.0207678	0.026238	0.0242401	0.0275558	0.029765	0.0330035	0.0228887	0.0274449	0.0304589	0.0357881	0.0263558	0.0401043	0.0328461	0.0315257	0.030115	0.0285297	0.0202658	0.0152255	0.0266426	0.0231207	0.0240673	0.0229487	0.0349841	0.0187598	0.0219842		0.028474	0.0292188	0.0246439
78	K<->M	1	0.00198351	0.00161908	0.00147696	0.00215494	0.00189663	0.000810937	0.00308336	0.00240501	0.00216003	0.00312872	0.000702762	0.00257221	0.0017015	0.00138009	0.00246118	0.00120889	0.00202741	0.00345153	0.00233241	0.00184189	0.00211413	0.0024655	0.00373205	0.00304272	0.00252929	0.00235359	0.00328028	0.00426018	0.00175165	0.00313611	0.00271009	0.00235373	0.00251594	0.00399503	0.0019651	0.00433781	0.00235559	0.00410283	0.00385911	0.00264889	0.00140848	0.00164269	0.00267621		0.00245665	0.00241506	0.00267054
79	A<->F	2	0.00138735	4.35602e-07	0.000134831	0.00120458	0.00102012	0.00048488	0.000335463	0.000143116	0.00114222	5.95267e-05	0.000617603	0.000850207	0.000513972	0.000673565	0.00062932	0.000516964	0.000797638	0.000850944	5.53505e-07	0.00158777	0.000574417	4.50374e-07	0.0028377	0.00086144	0.00160666	0.000212208	0.00123284	0.00154713	0.00096067	0.00133751	0.000391581	0.000980814	0.000215561	0.00112418	0.000951859	0.00286018	0.000470779	0.00138215	0.00138524	0.00298479	0.000999818	0.00343539	0.00129012		0.000990571	0.000851285	0.0017069
80	R<->F	2	0.00064287	4.35602e-07	0.000725852	4.85903e-05	9.69025e-05	4.57585e-07	0.000373888	4.33552e-07	0.000189818	0.00133216	7.74549e-05	5.76619e-06	4.5246e-07	0.000105742	9.13203e-05	4.80209e-07	0.000274694	0.000130839	0.000830811	0.000180151	0.000256798	0.000196111	0.000675685	0.000506898	0.000604927	0.000492333	0.000562932	5.23565e-07	5.45832e-07	5.70753e-07	0.000234863	9.4115e-05	0.000291203	0.000774587	0.00100707	0.000196519	0.00104236	0.000939129	4.82172e-07	0.00134559	0.000410705	3.67699e-07	0.000111306		0.000345459	0.000305689	0.000549992
81	N<->F	2	0.000449538	4.35602e-07	4.47215e-07	0.00167341	5.45162e-07	4.57585e-07	5.33607e-07	0.000579573	5.09728e-07	4.21607e-07	4.50555e-07	0.000524741	0.00249321	0.00121673	0.00253681	0.00192468	0.000970216	0.000401222	0.00154765	0.000529299	0.000157226	0.000482923	0.00553972	0.00142138	0.00227324	0.000348481	5.43381e-07	8.08332e-05	5.45832e-07	0.00086267	0.00212798	0.00130385	5.11645e-07	0.00206422	0.00136128	0.000572606	0.000252469	0.00212917	0.00229516	0.00239527	0.0002238	0.000881905	0.000410698		0.000977613	0.000929136	0.00122692
82	D<->F	2	5.12055e-07	4.35602e-07	4.47215e-07	0.000171422	5.45162e-07	4.57585e-07	0.000181384	4.33552e-07	5.09728e-07	0.000103728	4.50555e-07	5.95066e-07	4.5246e-07	4.6429e-07	0.000818062	4.80209e-07	5.12374e-07	5.61612e-07	5.53505e-07	5.83919e-07	4.67824e-07	0.00018691	8.46882e-05	5.26434e-07	7.01306e-05	0.000302003	0.00037164	5.23565e-07	5.45832e-07	0.000118528	8.06253e-05	0.00090532	0.000219961	4.29037e-07	0.000293157	1.92647e-07	0.00173276	0.000654161	0.00138041	0.000759455	0.000876471	4.37231e-05	0.000293947		0.000224632	0.00010884	0.000820132
83	C<->F	1	0.0063058	0.00499257	0.010957	5.09653e-07	0.00971518	0.00369316	0.00923431	4.33552e-07	0.0123175	4.21607e-07	0.00936991	0.00493251	0.00567621	0.000121644	0.00565528	4.80209e-07	0.00726006	0.00250304	0.00373184	0.0134561	0.00488981	0.00606173	0.00461119	0.00911311	0.0122367	0.00233651	5.43381e-07	0.00178141	0.00706152	0.0021326	0.0040866	5.58016e-07	0.00952282	0.00170685	4.48005e-07	0.00396389	0.00626013	3.80709e-07	0.00478651	0.00428657	0.0010424	3.67699e-07	0.00615652		0.00469681	0.00498417	0.00321898
84	Q<->F	3	5.12055e-07	0.000758008	0.000326748	0.000487172	0.00207137	4.57585e-07	0.0015039	4.33552e-07	5.09728e-07	0.000254663	0.000389757	0.000427888	0.000635978	0.00204724	0.00080628	0.000706676	0.000712482	0.000303029	0.000665385	0.00147933	0.000417009	0.000744959	0.00231581	0.00070431	0.000853164	0.000746327	0.00135624	0.000720347	0.00124248	0.000440182	0.00100674	0.000687688	0.0014639	0.00090422	4.48005e-07	0.0017536	5.28675e-07	0.00227757	0.00490313	0.00233899	0.000649129	0.000651192	0.000269858		0.000930829	0.000803757	0.00158434
85	E<->F	3	5.12055e-07	0.00038485	4.47215e-07	5.09653e-07	5.45162e-07	0.000190227	0.000379827	4.33552e-07	5.09728e-07	4.21607e-07	4.50555e-07	0.000265233	4.5246e-07	8.25137e-05	5.25524e-07	4.80209e-07	5.12374e-07	5.61612e-07	0.000601483	5.83919e-07	0.000545721	4.50374e-07	0.00075733	5.26434e-07	4.55976e-05	5.62557e-07	5.43381e-07	0.000450737	5.45832e-07	1.21228e-05	5.915e-05	0.000232542	0.00131687	0.000385232	4.48005e-07	0.0013181	0.00102366	3.80709e-07	0.000295292	0.000796297	0.0020011	0.000493997	0.000454118		0.000281451	0.000195488	0.000723549
86	G<->F	2	5.12055e-07	4.35602e-07	1.90379e-05	5.09653e-07	0.000487827	0.000135061	5.33607e-07	4.33552e-07	5.09728e-07	8.32294e-05	4.24423e-05	0.000177824	4.5246e-07	6.41696e-05	5.25524e-07	7.12582e-05	5.12374e-07	0.000171123	0.000129443	0.000222917	4.67824e-07	0.000150952	0.00013559	3.03278e-05	6.57688e-05	7.16754e-05	0.000106611	0.000126729	5.45832e-07	5.70753e-07	8.19268e-05	0.00025325	4.77876e-05	0.000325343	6.22683e-05	0.000498183	0.00015266	3.80709e-07	0.000252099	0.000904184	0.00125051	0.000398218	4.84868e-07		0.000151751	9.90765e-05	0.000422649
87	H<->F	2	0.00568725	0.0056485	0.00499527	0.00336309	0.0072558	0.0151146	0.0103368	0.00818614	0.012152	0.011533	0.00909322	0.00371553	0.00353427	0.00761957	0.00491189	0.00742768	0.00711847	0.00892537	0.00692218	0.00700958	0.010644	0.00335493	0.00903012	0.00625912	0.00637989	0.00852805	0.00511357	0.0113827	0.00450859	0.00903444	0.00462793	0.0124814	0.0106789	0.00408682	0.00504011	0.00657411	0.00354605	0.00508765	0.00542525	0.00534592	0.0036073	0.000618393	0.00818758		0.00697891	0.00745208	0.00454545
88	I<->F	1	0.00448125	0.00484238	0.00591878	0.00506402	0.00296573	0.00219564	0.00397916	0.00037498	0.00538735	0.00108722	0.00177206	0.00342448	0.00382985	0.00504218	0.00465535	0.00859175	0.00410562	0.00358844	0.00580886	0.00307991	0.00425242	0.0032583	0.0052905	0.00567222	0.0028018	0.00458686	0.00892778	0.00669991	0.0037061	0.00688987	0.00287667	0.0077949	0.00268817	0.00354554	0.00178422	0.00543146	0.00731201	0.00667995	0.00684986	0.00538978	0.0041285	0.00591666	0.00380383		0.00456936	0.00434449	0.0057258
89	L<->F	1	0.00639099	0.0121189	0.00677339	0.012084	0.00933037	0.00849256	0.0104464	0.0115328	0.00551772	0.00682616	0.0110485	0.0152928	0.0146425	0.0150443	0.0102978	0.009455	0.0132139	0.00965172	0.0203528	0.0150268	0.0127876	0.0180677	0.0152231	0.0148691	0.0179148	0.0179201	0.0159296	0.0149789	0.014499	0.0162519	0.0104058	0.0106461	0.0122754	0.012864	0.00922556	0.0124971	0.016231	0.00674819	0.014419	0.0129747	0.00898946	0.00767971	0.010986		0.0122773	0.0124971	0.0111469
90	K<->F	3	7.65574e-05	4.35602e-07	0.000175237	5.09653e-07	5.45162e-07	0.000480254	9.20845e-05	0.000552537	0.0005541	0.000505802	0.000366648	5.95066e-07	0.000268363	9.86339e-05	8.86717e-05	4.80209e-07	2.42302e-05	0.000573822	5.53505e-07	5.83919e-07	0.000376659	0.000499496	5.20198e-07	0.000317608	5.51428e-07	0.000356571	0.00014975	5.23565e-07	0.00019567	0.000377804	0.000209262	0.00156926	5.11645e-07	0.000291513	0.00051698	0.00307889	0.000264332	0.000306977	0.000851834	2.75292e-07	0.000857628	0.00112701	0.000817018		0.000372728	0.000327839	0.000603582
91	M<->F	2	0.00734328	0.00542494	0.0038532	0.00446354	0.00138903	0.00275663	0.00741712	0.0106227	0.00545927	0.00695761	0.00432051	0.0045814	0.00240813	0.00934529	0.00927088	0.00500008	0.00681761	0.00329077	0.00823537	0.00509439	0.00877802	0.00688365	0.00560161	0.00688069	0.00479382	0.00340019	0.00452435	0.0034605	0.00640112	0.00513743	0.00414063	0.00506223	0.0028059	0.00672605	0.00473951	0.00702517	0.00586182	0.00836303	0.0109473	0.00991925	0.00552194	0.00446463	0.00758785		0.00588555	0.00556702	0.00752369
92	A<->P	1	0.00961056	0.00964133	0.00524238	0.00348998	0.00823889	0.00805226	0.00797867	0.0101097	0.00714628	0.00847588	0.00711528	0.006456	0.00793479	0.00652783	0.0086732	0.00674145	0.00821863	0.00953746	0.00582882	0.0060809	0.0044568	0.0103327	0.0110212	0.00859526	0.00741904	0.00887643	0.00499132	0.00761437	0.00719701	0.00662861	0.0061667	0.00523419	0.00803237	0.00556466	0.00649745	0.00698843	0.00563771	0.00706719	0.00576542	0.00492204	0.00997779	0.00603736	0.00605242		0.00725992	0.0074088	0.00649428
93	R<->P	1	0.000564823	0.000364002	0.000399139	5.09653e-07	0.00032575	4.57585e-07	0.00106852	0.000374537	0.000563377	0.000189306	0.000338655	0.000465615	0.00031284	0.000650025	0.000168614	4.80209e-07	0.00113141	0.00114928	5.53505e-07	0.00060557	0.000597645	0.0010694	0.000649582	0.000170438	0.00146415	0.000286673	0.000573212	5.41314e-05	0.000762789	0.000719788	0.00131328	5.58016e-07	0.000452985	0.000299858	0.00090696	0.00297913	0.000809152	0.00122712	0.00187305	0.00176017	0.00122363	0.00173879	0.00104981		0.000712924	0.000582612	0.0013831
94	N<->P	2	0.000529352	4.35602e-07	0.00149036	5.09653e-07	3.68366e-05	0.000498351	0.00157912	4.33552e-07	0.00128179	0.0014857	0.00121911	0.0011228	4.5246e-07	0.00105367	0.00091026	0.000773526	0.00162766	0.00141711	5.53505e-07	0.000428713	0.000657208	0.00045667	0.000727549	0.000894879	0.000910738	0.000617969	0.000743986	5.23565e-07	7.92166e-05	0.000473588	0.00138602	0.00101168	5.11645e-07	0.000680431	0.00267005	0.00311461	0.00050425	3.80709e-07	0.000671352	0.00237858	0.00213894	0.0033776	0.00113755		0.000932349	0.000830066	0.00145838
95	D<->P	2	0.0026749	0.00110915	0.000844203	5.09653e-07	0.00247285	0.000404144	0.00122069	4.33552e-07	0.00132337	0.00272087	0.00027592	0.000631972	0.000488336	0.000476891	5.25524e-07	0.000776229	0.0027358	5.61612e-07	0.000719601	0.00184109	0.00135319	0.00121853	5.20198e-07	0.000724052	0.00292473	0.00140192	0.000286699	0.000742159	0.000263997	0.000632748	0.000370129	0.00208309	0.000252589	4.29037e-07	0.00106251	0.00172332	0.000975717	0.00161109	0.00148888	0.00103875	0.00185272	0.00658019	0.00101818		0.00117033	0.000993296	0.00208079
96	C<->P	2	0.0055619	4.35602e-07	4.47215e-07	5.09653e-07	5.45162e-07	4.57585e-07	0.00187393	4.33552e-07	5.09728e-07	4.21607e-07	0.00113627	5.95066e-07	0.00143293	4.6429e-07	5.25524e-07	4.80209e-07	0.00100848	0.00152608	0.00257351	5.83919e-07	2.79712e-05	4.50374e-07	5.20198e-07	5.26434e-07	5.51428e-07	5.62557e-07	0.000229649	5.23565e-07	5.45832e-07	5.70753e-07	0.000849645	5.58016e-07	5.11645e-07	4.29037e-07	4.48005e-07	0.00648037	0.000171677	3.80709e-07	4.82172e-07	0.00316253	0.0005352	3.67699e-07	4.84868e-07		0.000618243	0.000630926	0.000553017
97	Q<->P	1	0.00282604	0.00374901	0.00100719	0.00396021	0.0018836	0.00189421	0.0021496	0.00105272	0.00413096	0.00114925	0.00257604	0.00308012	0.00456805	0.0040871	0.00368341	0.00610961	0.00398528	0.00277862	0.00990048	0.0020843	0.00113717	0.00337368	0.0039186	0.0034272	0.00142492	0.00256797	0.00237537	0.00429744	0.00265216	0.00423514	0.00265985	0.00392712	0.00407912	0.00424375	0.00398444	0.00326859	0.00378106	0.00453568	0.00321317	0.00227915	0.00806788	0.00294368	0.00101314		0.00335028	0.00328412	0.00369054
98	E<->P	2	0.00177113	0.000308423	0.000482428	0.0010609	0.00206555	0.00150449	0.00192306	0.0032283	0.00297932	0.00288794	0.0026311	0.000948987	0.000910504	0.00237263	0.00196939	0.0013446	0.000470426	0.00271303	0.000675891	0.00188551	0.00202485	0.00361858	0.00281644	0.00185034	0.00158104	0.00171996	0.0013845	0.000559811	0.00228355	0.0011197	0.00194769	0.000225065	0.000508749	4.29037e-07	0.00247906	0.00396067	0.00182978	0.00165655	0.00295762	0.00283074	0.00290706	0.00444605	0.00138393		0.00186572	0.00172817	0.0025731
99	G<->P	2	0.000466324	0.000626835	0.00028586	5.09653e-07	0.000370465	4.57585e-07	0.000515005	0.000336866	0.000479374	0.00101169	0.000944827	0.000386638	0.000178749	0.000397344	0.000121386	6.04151e-05	0.000704724	0.000163648	0.000166013	0.00032599	0.000573898	0.00169832	5.20198e-07	5.26434e-07	0.00111329	0.000305491	0.000408916	0.000188599	0.000401067	0.000180866	0.000467297	0.000567363	0.000526216	0.000426484	0.00103537	0.00123348	0.000492164	0.00194167	0.00124846	0.00088863	0.000734079	0.00103776	0.000889326		0.000555882	0.000463079	0.00103316
100	H<->P	1	0.00148441	0.00151822	0.00178959	0.000394686	0.0026853	0.00231425	0.00230067	0.00108348	0.000784619	0.000472499	0.00223672	0.00150872	4.5246e-07	0.00120516	7.54705e-05	4.80209e-07	0.00123282	5.61612e-07	0.0013531	0.00145138	0.00119907	0.0011572	0.00227387	0.00148565	5.51428e-07	0.00283828	5.43381e-07	0.000929883	0.00241049	0.00131229	0.000991925	5.58016e-07	5.11645e-07	0.00149046	0.00012123	0.00466974	0.00270229	0.000553204	0.00312339	0.00227172	0.00478762	0.000730413	0.00164888		0.00140913	0.00124375	0.00225965
101	I<->P	2	0.000331095	0.000529047	4.47215e-07	5.09653e-07	5.45162e-07	4.57585e-07	0.000658994	0.00091555	0.000456456	0.000322761	0.000395443	0.000514405	0.000124608	0.000363614	0.000175141	0.000589236	0.00024679	0.000128873	0.000892211	9.54882e-05	0.000529735	0.00053654	0.000620555	0.000180246	5.51428e-07	5.62557e-07	5.43381e-07	0.00014974	0.000143155	0.000562272	0.000204631	5.58016e-07	0.00073136	4.29037e-07	4.48005e-07	0.00126115	0.000375866	3.80709e-07	0.000178418	0.00145298	0.0029441	0.00252581	0.000451854		0.000455664	0.000324004	0.00113277
102	L<->P	1	0.00103854	0.000911187	0.00013458	0.00199781	0.000728559	0.000165568	0.000680183	4.33552e-07	0.000471509	0.00093517	0.000757847	0.00157312	0.000404264	0.000738779	0.000231399	0.00129461	0.00165285	0.000903471	0.000790815	0.00219391	0.000970439	0.00163505	0.00311096	0.000978214	0.00151209	0.00109628	0.00112215	0.00133864	0.00153275	0.00101117	0.00117348	5.58016e-07	0.000347356	0.000698064	0.000327376	0.000987696	0.00133737	0.00177349	0.00156901	0.00228907	0.00211006	0.00141701	0.00149903		0.0011033	0.000984635	0.00171358
103	K<->P	2	0.000568248	0.000686752	8.48948e-05	0.000488136	0.000554664	0.000567978	0.000941955	0.000357598	0.000591677	0.00091283	0.000303246	0.000667896	0.000323848	0.000885458	0.00175827	0.0014506	0.00178157	0.0019382	0.00128573	0.00129551	0.00169466	0.00273726	0.0015016	0.00107158	0.00170312	0.00159932	0.000746638	0.000645205	0.000914574	0.000918684	0.000821168	0.000447864	0.000836268	0.000153479	0.000601295	0.00324564	0.000940549	0.0014902	0.000742689	0.00184516	0.00293138	0.00377287	0.00133288		0.00116603	0.00103009	0.0018651
104	M<->P	2	5.12055e-07	4.35602e-07	0.00147005	0.000415984	5.45162e-07	0.000256778	0.000294375	4.33552e-07	5.09728e-07	4.21607e-07	4.50555e-07	5.95066e-07	4.5246e-07	4.6429e-07	0.000255331	4.80209e-07	0.00144961	0.000721402	0.00160012	0.00104631	4.67824e-07	0.000821505	0.000243354	0.000496569	0.000282656	0.000540223	5.43381e-07	0.000840981	5.45832e-07	0.000620974	0.000653782	0.000239947	0.000767892	0.000701848	0.000599826	0.00381494	5.16621e-05	0.0018384	0.000504761	0.00117118	0.000176914	3.67699e-07	0.00030699		0.000516083	0.000503925	0.00057861
105	F<->P	2	0.00120007	0.00064148	0.000332835	0.000967118	5.45162e-07	0.000606849	0.00016378	4.33552e-07	5.63402e-05	4.21607e-07	4.50555e-07	5.95066e-07	4.5246e-07	0.000444693	0.000671909	4.80209e-07	0.000233473	5.61612e-07	0.00130145	5.83919e-07	0.000711845	5.35089e-05	0.000144615	5.26434e-07	5.51428e-07	0.000361679	0.000209897	7.68593e-06	2.38092e-05	0.000133014	0.000464322	0.000135782	5.11645e-07	0.00113133	4.48005e-07	0.00311352	0.001479	0.000516257	0.00185401	0.00109204	0.00173362	3.51447e-05	0.000483617		0.000472355	0.000364377	0.00102767
106	A<->S	1	0.0349624	0.0425987	0.0277983	0.0361427	0.0392791	0.0356405	0.0383019	0.0443026	0.0332549	0.0377709	0.0398366	0.0440225	0.0386458	0.0395228	0.0446549	0.043566	0.0340289	0.036413	0.031215	0.0373202	0.032901	0.0356269	0.0449298	0.0458583	0.0274286	0.0382332	0.0332432	0.037499	0.0365612	0.0395632	0.0356713	0.0377537	0.0401274	0.026763	0.0435058	0.0205801	0.0321574	0.0235728	0.026852	0.0190488	0.0284555	0.0229198	0.0326728		0.0353768	0.0370979	0.0265256
107	R<->S	1	0.00287267	0.0017197	0.00301341	0.00185734	0.00753919	0.00485184	0.00376007	0.00553774	0.00285036	0.00222715	0.0026349	0.00494613	0.000277625	0.00311216	0.00201653	0.00265771	0.00383023	0.00259999	0.00190955	0.00086653	0.00321802	0.00211846	0.00216617	0.00340103	0.0031032	0.00375938	0.00165841	0.00257796	0.00184979	0.001562	0.00338401	0.000965373	0.00248669	0.00170868	0.00350128	0.00220601	0.00366103	0.00503638	0.00379927	0.00530959	0.00342295	0.00217178	0.00196074		0.00293277	0.00279854	0.0036231
108	N<->S	1	0.0322737	0.0298146	0.0407785	0.0365763	0.036153	0.0385008	0.0242531	0.0310389	0.0215394	0.0240688	0.0304044	0.0292062	0.0273869	0.0255543	0.0237522	0.0332527	0.0245093	0.0359413	0.0228292	0.0299724	0.0249741	0.0311541	0.0284306	0.0383345	0.0312296	0.0256658	0.0285797	0.026981	0.024254	0.0259255	0.0280729	0.0310889	0.0255635	0.0245148	0.0288053	0.0181492	0.0300511	0.0243177	0.0203642	0.0244672	0.0223712	0.0133846	0.0188739		0.0277525	0.0288758	0.0219757
109	D<->S	2	0.00656749	0.00908947	0.00301907	0.00361078	0.00800794	0.00490717	0.00829074	0.00306765	0.0058707	0.00661738	0.00587382	0.00570296	0.00723933	0.0094376	0.00779714	0.00374672	0.00297441	0.0079451	0.00849965	0.00730881	0.00674203	0.00401485	0.00993177	0.00668231	0.00726178	0.0084505	0.00839067	0.0036137	0.00475271	0.00733787	0.00714754	0.0048072	0.00808626	0.00361164	0.00764962	0.0105828	0.00670419	0.0136577	0.00673102	0.0086491	0.0072175	0.0172004	0.00780942		0.00703736	0.0065177	0.0097099
110	C<->S	1	0.0160436	0.0120442	0.025807	0.0507081	0.0168181	0.0263236	0.0210059	0.0249885	0.00903614	0.00403907	0.00448492	0.0182507	0.0203539	0.0146765	0.0120548	4.80209e-07	0.0222928	0.0347716	0.0193846	0.0183495	0.024385	0.0264202	0.0258134	0.0183026	0.0187089	0.0174529	0.0205978	0.0216785	0.0197255	0.0124162	0.0206551	0.00657715	0.0194162	0.0164711	0.00604966	0.00612336	0.0113511	3.80709e-07	0.011954	0.0161766	0.0101453	0.0247473	0.0157972		0.0172651	0.0181174	0.0128817
111	Q<->S	2	0.0128695	0.0024284	0.00697429	0.00237262	0.00354477	0.00314909	0.0103451	0.00457128	0.0124662	0.01176	0.00913216	0.00738711	0.00557144	0.00959136	0.0104683	0.0140466	0.0060022	0.00689194	0.00936838	0.00814591	0.0131006	0.00995119	0.00547826	0.0100169	0.0084865	0.00960358	0.00758766	0.00689098	0.0133445	0.0137295	0.00615852	0.00652961	0.0064664	0.00374573	0.00857094	0.00451168	0.00605395	0.00662587	0.00931116	0.00855262	0.00497854	0.00919136	0.0104495		0.00805633	0.00809053	0.00788042
112	E<->S	2	0.00365506	0.00456575	0.0051934	0.00192796	0.00435992	0.00461946	0.00494586	0.00135666	0.00369378	0.00288021	0.00330386	0.00351919	0.000998331	0.00331112	0.0037217	0.00188298	0.00288337	0.00553524	0.00396668	0.00271332	0.00452123	0.00395209	0.00506785	0.0029412	0.00380609	0.00475437	0.00397435	0.00583199	0.00538014	0.00890296	0.00281207	0.00215814	0.00336096	0.00129725	0.00559151	0.00342055	0.00680546	0.00680596	0.00487104	0.00652163	0.00432597	0.00509781	0.00366935		0.00406753	0.00380018	0.00544246
113	G<->S	1	0.00603586	0.00670703	0.00966472	0.00422748	0.00751647	0.00808589	0.00645878	0.00414177	0.00613104	0.00604408	0.00787359	0.00571216	0.00524473	0.00600307	0.00502472	0.00549512	0.00847223	0.00664446	0.00558716	0.00707247	0.00611559	0.0112685	0.00488718	0.0106267	0.00629381	0.00935012	0.00755918	0.0057743	0.00646574	0.00651801	0.00737107	0.0045638	0.00652647	0.00317989	0.00802089	0.00461072	0.00751175	0.00558713	0.00585583	0.00696657	0.00681933	0.00671459	0.00548676		0.00656318	0.00659097	0.00642028
114	H<->S	2	0.00651034	0.0055718	0.00664504	0.00614472	0.00469182	0.00650108	0.00766586	0.00259149	0.00487915	0.00742368	0.00807987	0.00603005	0.00764834	0.00689523	0.00781489	0.0135611	0.00750026	0.00285157	0.0027643	0.00956504	0.0055538	0.00789969	0.000572265	0.00572403	0.00877155	0.00515641	0.00295671	0.00615064	0.00326847	0.00608349	0.00485049	0.0035948	0.00185432	0.00623232	0.0054143	0.00780121	0.00412697	0.0129702	0.00454347	0.0069949	0.00397407	0.00651181	0.00368285		0.00595406	0.00592278	0.0061149
115	I<->S	1	5.12055e-07	4.35602e-07	0.00079144	9.86332e-05	0.000307389	0.0002943	5.33607e-07	4.33552e-07	0.000279744	0.00142574	0.000769827	0.000657798	4.5246e-07	0.000141158	5.5385e-05	4.80209e-07	0.000194277	0.000250232	5.53505e-07	5.83919e-07	0.000418665	0.000643332	0.00039276	5.26434e-07	0.000120724	0.000217507	2.82938e-05	5.23565e-07	8.82119e-05	0.000560491	0.000103495	9.6375e-05	0.000200687	4.29037e-07	0.000122314	0.00163268	0.000581775	0.000852396	0.000450966	0.00110518	0.00119471	0.00178617	2.87091e-05		0.000369694	0.000274915	0.000857129
116	L<->S	1	0.000374425	0.0023869	0.00108012	0.00221961	0.000447163	0.0011433	0.000277187	0.00101211	2.76986e-05	0.000787127	0.000664488	0.00139711	4.5246e-07	0.000909972	0.000813296	0.000318989	0.000637562	0.000524355	0.00141121	0.00313584	0.000926019	0.00165531	0.0017019	0.00199265	0.00109978	0.00192836	0.00112313	0.00151506	0.0025345	0.000550023	0.00145594	0.000408272	0.000470488	0.000389754	6.8724e-05	0.00335913	0.00160571	0.0018219	0.00142789	0.0011256	0.00212749	0.00295759	0.00134776		0.00123632	0.00113189	0.00177342
117	K<->S	2	0.00308685	0.00449133	0.00478781	0.00363382	0.0060075	0.00573417	0.00445181	0.000559304	0.00488384	0.00654628	0.00636852	0.00276787	0.00355588	0.00380056	0.00451304	0.00468837	0.00299008	0.00388348	0.0034185	0.00323967	0.00393457	0.00397433	0.00425096	0.00329371	0.00352034	0.00594387	0.00347343	0.00332927	0.00418431	0.00519178	0.00369822	0.00301855	0.00238652	0.00291586	0.00479585	0.00595919	0.00690411	0.00573605	0.00442251	0.00593044	0.00560354	0.00345456	0.00367403		0.00425592	0.0040911	0.00510361
118	M<->S	2	0.00283486	0.00120566	0.00132612	0.00172647	0.00142984	0.00102872	0.00397098	0.00607283	0.00274982	0.00410281	0.000791039	0.00527038	0.00102512	0.00185951	0.00319361	0.00176391	0.00285271	0.00109877	0.00211609	0.00332093	0.0032379	0.00274866	0.00757962	0.00206325	0.000262016	0.00234129	0.00349258	0.00301302	0.000513999	0.00035111	0.00244028	0.00163951	0.00147331	0.00228103	0.00146373	0.00318752	0.00101141	3.80709e-07	0.00246932	0.00143178	0.00179713	0.00247051	0.00266441		0.002318	0.00243969	0.00169213
119	F<->S	1	0.000169572	0.00293962	0.000689086	0.00442948	0.00123452	0.00102716	0.00162221	0.00123159	0.00119422	0.000994874	0.0015882	0.00427089	0.00165524	0.00146642	0.00109979	0.00255104	0.00327945	0.00430052	0.00397438	0.00279668	0.00205968	0.00405197	0.00224678	0.00266453	0.00129546	0.00496514	0.00543274	0.00448319	0.00357113	0.000401382	0.0022932	0.000776418	0.00129344	0.00119149	0.00192983	0.000751149	0.000592295	0.00128003	0.00195763	0.00271968	0.00156523	0.00220813	0.00151675		0.00218052	0.00227562	0.00169139
120	P<->S	1	0.00562989	0.00931837	0.00539235	0.00908026	0.00641214	0.0053707	0.00495751	0.00295171	0.00101859	0.00477247	0.00442935	0.00569858	0.00381397	0.0055098	0.00773074	0.00338474	0.00609684	0.00625977	0.00564128	0.00818438	0.00970207	0.00930595	0.00685032	0.00922433	0.00940445	0.00874494	0.00807739	0.0100099	0.00842899	0.00783835	0.00669223	0.00459371	0.00606206	0.00370389	0.00709774	0.00297752	0.0071783	0.00913345	0.00656323	0.00817946	0.00585454	0.00841102	0.00597882		0.00655037	0.00639909	0.0073284
121	A<->T	1	0.00725773	0.013425	0.00838149	0.0153643	0.0088203	0.0085076	0.00700531	0.0190143	0.00768539	0.0107211	0.0108399	0.0125325	0.00761879	0.00804272	0.0110565	0.0116836	0.0111705	0.0105021	0.00743601	0.0137294	0.00566582	0.0187377	0.0111928	0.00907293	0.0118595	0.00761787	0.00851618	0.0103664	0.0108402	0.0091178	0.0127373	0.0113348	0.0082911	0.0105101	0.00787436	0.0099982	0.00813495	0.0099252	0.00825175	0.00836316	0.0115972	0.00933945	0.00699988		0.010166	0.0104035	0.00894451
122	R<->T	1	0.00131137	0.00227808	0.00111831	0.000186278	0.00169139	0.000768574	0.00208377	4.33552e-07	0.00171644	0.00168044	0.00209576	0.00179269	0.000851132	0.0016784	0.00102209	0.000509002	0.00116237	0.00104036	0.00198496	0.00201091	0.00213439	0.000947236	0.00177307	0.00209843	0.00115185	0.00226566	0.0031818	0.000970606	0.0010065	0.00215771	0.00100149	0.000446692	0.00133463	0.000950831	0.000722467	0.00442317	0.001953	0.00509274	0.00366171	0.00364947	0.00140741	0.00361399	0.00162575		0.0017338	0.00148748	0.00300058
123	N<->T	1	0.00994019	0.0151841	0.0156029	0.0201549	0.0143675	0.0218618	0.012001	0.0181674	0.017892	0.0125106	0.0154627	0.0122088	0.0139526	0.0091358	0.00977801	0.0112294	0.0127016	0.0198601	0.0133448	0.0141459	0.0121247	0.0128207	0.011283	0.0125378	0.00963125	0.0117627	0.0142992	0.0130386	0.011585	0.0130887	0.0128855	0.0140708	0.0109294	0.00808114	0.0205644	0.0112714	0.0111389	0.0120218	0.00707872	0.0112804	0.0117821	0.0113814	0.0122727		0.0131729	0.0135966	0.0109937
124	D<->T	2	0.00205191	0.00174565	0.00117233	0.000373774	0.000729508	0.00115048	0.00286286	4.33552e-07	0.00360215	0.00275775	0.00320087	0.00281662	0.00304061	0.00225219	0.00162265	0.00520002	0.00204974	0.00169479	0.00274317	0.000920881	0.00349571	0.000360295	0.0011473	0.00249895	0.00210649	0.00314123	0.000363141	0.00306135	0.00242519	0.00249996	0.00174553	0.00443749	0.00246597	0.00157535	0.00182891	0.00160305	0.00161608	0.00437398	0.00338071	0.00280659	0.00515242	0.00188872	0.00288928		0.00229889	0.00213179	0.00315825
125	C<->T	2	0.0127578	4.35602e-07	0.0212981	0.00473156	0.0123384	0.0206359	0.0120833	0.0303754	0.00893508	0.00981723	0.0145828	0.00291858	0.0127699	0.0118712	0.00997205	0.0222455	0.0106025	0.00273076	0.00367211	0.00332354	0.0101349	0.00196676	0.00284105	0.00429144	0.0184387	0.0056714	0.00240672	0.0108727	0.0106149	0.00512432	0.00750294	0.00536876	0.00470016	0.00798982	0.0134897	1.92647e-07	0.00741018	0.00209856	0.0110304	0.0126807	0.00597043	0.0153039	0.013951		0.00947725	0.0094188	0.00977787
126	Q<->T	2	0.0091964	0.0124714	0.00435438	0.00293192	0.0108635	0.00606666	0.00908823	0.00816792	0.00998282	0.0114379	0.00927711	0.00436476	0.013308	0.00959488	0.00984206	0.0112292	0.00574943	0.00699297	0.0102783	0.00713296	0.00790925	0.00557565	0.00750073	0.00736806	0.00719596	0.00772461	0.00835615	0.0095723	0.00872295	0.0142489	0.00791945	0.00779207	0.011074	0.00629442	0.0143218	0.00555296	0.00479838	0.0051544	0.00661633	0.00746254	0.0151766	0.0118886	0.0077784		0.00856594	0.00859611	0.00841076
127	E<->T	2	0.00499942	0.0038261	0.00311219	0.00324737	0.00325296	0.00525701	0.00396882	0.0012933	0.00605469	0.00815744	0.00374062	0.0037346	0.00547124	0.00541821	0.00869612	0.00592286	0.00621787	0.00537638	0.00461761	0.00594799	0.00541908	0.00555777	0.0059378	0.00789524	0.00553735	0.00564855	0.0076889	0.00417277	0.00421299	0.00480258	0.00342086	0.00567502	0.00701631	0.00657251	0.00462622	0.00242695	0.0056541	0.00832117	0.00562032	0.00466487	0.00372587	0.00323231	0.00528104		0.00514938	0.00513677	0.00521424
128	G<->T	2	0.000830426	0.00088773	4.47215e-07	0.000271028	0.000174561	0.000660698	0.000423038	0.000344722	0.000487412	0.00109834	0.000786376	0.000470751	0.000660972	0.000312709	0.000156738	2.6714e-05	0.000395512	0.000376471	5.53505e-07	7.6435e-06	0.000285059	0.000392177	0.000950412	5.26434e-07	0.00073529	0.000470697	0.00047767	0.000683561	0.000383769	0.000398214	0.000716505	0.00125055	4.7716e-05	0.000333765	8.25092e-05	0.00127134	0.000972507	0.00281286	0.00149639	0.00132678	0.00137121	0.00046361	0.000189831		0.000592693	0.000468128	0.00123331
129	H<->T	2	0.00288454	0.00282476	4.47215e-07	5.09653e-07	5.45162e-07	4.57585e-07	0.00115791	4.33552e-07	0.0022766	0.00315218	0.000458917	5.95066e-07	0.000660207	0.00118739	0.00174293	0.00198182	0.00247826	0.000446297	0.000385312	0.000421035	0.00188451	0.00191214	0.00171472	0.000656889	0.0011946	0.00109449	5.43381e-07	5.23565e-07	0.000695619	0.0034385	0.00246155	0.000225595	0.00143965	0.00186256	0.00129328	0.00137287	0.00226863	0.000882091	0.000656115	0.00265273	0.00393939	0.00637758	0.00244257		0.00145415	0.00120303	0.00274559
130	I<->T	1	0.00464577	0.00407589	0.000377664	0.00671948	0.00308877	0.00235341	0.00268145	0.00242169	0.00322826	0.00451354	0.00519422	0.00647792	0.00305309	0.00466567	0.00403582	0.00389704	0.00643633	0.00758333	0.00591023	0.00622032	0.00423962	0.00548693	0.00778732	0.00595005	0.00519155	0.00579889	0.00821087	0.00619728	0.00900855	0.0080629	0.00800839	0.00634735	0.00124358	0.00358335	0.00168405	0.00704555	0.00690177	0.00330439	0.00649663	0.00345685	0.006468	0.00597882	0.00531587		0.00510113	0.00503962	0.00541748
131	L<->T	2	0.00091218	0.00180381	0.00141556	0.00209803	0.000655426	0.000828746	0.00126578	0.00104405	0.00100195	0.00251271	0.00109278	0.00109436	0.000570607	0.00125007	0.0022634	0.000980971	0.00297469	0.00200806	0.00145669	0.00223282	0.000418529	0.00228569	0.00125734	0.00109917	0.00257957	0.000477813	0.00322065	0.00215247	0.00118368	0.00145919	0.00153022	0.00114641	0.000858509	0.000463475	0.00171781	0.00192837	0.00266296	0.00202793	0.00132882	0.0036398	0.00287722	0.00281849	0.00204798		0.0016429	0.00147893	0.00248617
132	K<->T	1	0.00440475	0.00566005	0.00330177	0.00394889	0.00351123	0.00737222	0.00500792	0.00576264	0.00595747	0.00677993	0.00674548	0.00470032	0.00773831	0.00564683	0.00709667	0.00594348	0.00655288	0.00737665	0.00587269	0.00668065	0.00461119	0.00593622	0.00624744	0.00511176	0.00703976	0.00464717	0.00592894	0.00673527	0.00550352	0.00468984	0.00523818	0.00738671	0.0063884	0.00412631	0.00561568	0.00556438	0.00938387	0.00802553	0.00542716	0.00494053	0.00527719	0.00643001	0.00743354		0.00590115	0.00574532	0.00670255
133	M<->T	1	0.0084477	0.00540524	0.0069546	0.00458609	0.00518349	0.00817118	0.00631129	0.00448592	0.00681771	0.00647697	0.005857	0.0147497	0.00652777	0.00661917	0.00554787	0.00955848	0.00768947	0.00505254	0.00850397	0.0154531	0.0113997	0.0116844	0.00880757	0.00940493	0.00783438	0.00940513	0.00694001	0.0114062	0.0102451	0.0132195	0.0103716	0.00909207	0.00973983	0.0102876	0.00796709	0.00548899	0.00783879	0.0108498	0.00869359	0.00990042	0.00867399	0.00303406	0.005717		0.0082884	0.00838037	0.00781538
134	F<->T	2	0.000660894	0.00270527	4.47215e-07	0.000918818	0.000377922	0.000413213	0.00190997	0.00255462	0.000620645	4.21607e-07	0.00128161	0.00035488	0.000409938	0.00169294	0.00235972	0.000243562	0.00121128	0.000136758	0.00291574	0.00310367	0.000639136	0.000303147	0.000491556	0.00150185	0.000915927	0.000133844	0.00188979	0.000154546	0.00081639	0.00066757	0.000343709	0.000658509	5.11645e-07	0.000235331	0.00197804	0.00121255	0.00166201	0.00159826	0.00291199	0.0015928	0.00200196	0.00111646	0.000225958		0.00109126	0.000994854	0.00158706
135	P<->T	1	0.00233318	0.000516911	0.00175179	0.000653732	0.000591348	0.00104011	0.00107367	0.000924026	0.00278672	0.00173583	0.00250302	0.00121422	0.0015754	0.00132843	0.00118029	0.0014373	0.00322408	0.00343331	0.00125822	0.00242953	0.00120466	0.0016476	0.00125978	0.00164383	0.00269257	0.000886286	0.00077999	0.000841877	0.00251193	0.00169219	0.00345316	0.00162787	0.00177784	0.000361197	0.00139687	0.00377356	0.00284966	0.00478901	0.00258021	0.0037576	0.00343353	0.000624412	0.00358309		0.00191069	0.00168173	0.00308821
136	S<->T	1	0.0390896	0.0471091	0.0447651	0.0423441	0.0558638	0.0503639	0.04218	0.0629123	0.0460924	0.0548191	0.0515864	0.039329	0.0419074	0.0388344	0.0406498	0.0649524	0.0395908	0.0366806	0.0265939	0.0375551	0.0345699	0.0419017	0.0405374	0.037611	0.0396865	0.0428241	0.0440871	0.037757	0.0353912	0.0399167	0.0445138	0.0415195	0.0435107	0.0306151	0.0545013	0.0180816	0.039114	0.0300025	0.0304222	0.0355258	0.0318956	0.0243825	0.0358026		0.0408695	0.0425068	0.0324493
137	A<->W	2	0.0013913	4.35602e-07	4.47215e-07	5.09653e-07	0.000222382	4.57585e-07	0.00180255	0.00125128	5.09728e-07	4.21607e-07	0.000625231	5.95066e-07	0.000214349	0.000216178	5.25524e-07	4.80209e-07	0.000459948	5.61612e-07	0.000228282	5.83919e-07	0.0012834	0.000356367	5.20198e-07	0.001106	5.51428e-07	5.62557e-07	0.00287191	5.23565e-07	5.45832e-07	0.00308724	0.000870365	0.00354053	0.00569488	0.0034139	0.000144782	0.00327846	5.28675e-07	3.80709e-07	0.00510599	0.00131575	0.000512934	0.0025162	0.00133373		0.000996583	0.000890766	0.00154079
138	R<->W	1	5.12055e-07	4.35602e-07	0.00110785	0.00189431	0.00166631	0.000562189	0.00204177	4.33552e-07	5.09728e-07	0.00288509	0.00119616	0.00338863	4.5246e-07	0.000148629	5.25524e-07	0.0014911	0.00221564	0.00141275	0.00140677	0.00262446	0.00147289	0.0003347	5.20198e-07	0.000385055	0.000337551	0.000567755	0.00138966	0.00148164	0.00386591	0.00213762	0.00377403	5.58016e-07	0.00406518	0.00116858	7.83427e-05	0.00221371	0.00756164	0.00452515	0.00285716	0.00259783	0.00626411	0.00135553	0.00315488		0.00175894	0.0013144	0.00404519
139	N<->W	3	5.12055e-07	4.35602e-07	4.47215e-07	0.00114394	0.00935187	0.000522036	5.33607e-07	4.33552e-07	0.000657065	4.21607e-07	0.000303341	5.95066e-07	0.00113743	4.6429e-07	0.0026033	4.80209e-07	0.00211366	0.00112103	9.15608e-05	5.83919e-07	4.67824e-07	4.50374e-07	5.20198e-07	0.000925102	0.00155967	5.62557e-07	5.43381e-07	5.23565e-07	0.00352248	5.70753e-07	0.00251425	5.58016e-07	5.11645e-07	4.29037e-07	0.00160657	1.92647e-07	0.00258574	3.80709e-07	0.00150262	2.75292e-07	1.71468e-07	3.67699e-07	4.84868e-07		0.000773804	0.000810654	0.00058429
140	D<->W	3	5.12055e-07	4.35602e-07	4.47215e-07	5.09653e-07	5.45162e-07	4.57585e-07	0.000342373	4.33552e-07	5.09728e-07	4.21607e-07	4.50555e-07	5.95066e-07	0.00123983	4.6429e-07	5.25524e-07	4.80209e-07	0.000348286	5.61612e-07	5.53505e-07	0.000390566	0.000529034	4.50374e-07	0.00123891	5.26434e-07	5.51428e-07	5.62557e-07	0.00218665	0.000936778	5.45832e-07	5.70753e-07	5.81041e-07	5.58016e-07	5.11645e-07	4.29037e-07	4.48005e-07	1.92647e-07	0.00100433	3.80709e-07	0.000514646	0.0021874	0.00117592	0.00166484	4.84868e-07		0.000320332	0.00020073	0.000935428
141	C<->W	1	0.00213322	0.00992085	0.00720169	5.09653e-07	5.45162e-07	4.57585e-07	0.00475413	4.33552e-07	0.00711955	0.00493902	4.50555e-07	0.00400769	4.5246e-07	0.000659186	0.00231679	0.0011408	5.12374e-07	0.00903936	5.53505e-07	0.00183509	4.67824e-07	0.00105124	0.00650167	5.26434e-07	0.00136048	0.00477775	0.000669097	0.00385155	0.00223686	5.70753e-07	0.000971379	0.00186004	0.00883993	4.29037e-07	0.000683831	1.92647e-07	0.00904633	3.80709e-07	0.00259528	2.75292e-07	0.00593788	3.67699e-07	0.00249477		0.00251053	0.00244104	0.0028679
142	Q<->W	2	5.12055e-07	0.000994069	0.00117726	5.09653e-07	0.00117015	4.57585e-07	0.000916043	4.33552e-07	5.09728e-07	4.21607e-07	0.00088088	5.95066e-07	4.5246e-07	0.00136979	0.00206631	4.80209e-07	0.00224513	5.61612e-07	0.00430211	0.000776717	0.00281251	4.50374e-07	5.20198e-07	0.000542343	0.00127147	5.62557e-07	5.43381e-07	0.00221925	0.00224046	0.000998201	0.00120188	5.58016e-07	5.11645e-07	4.29037e-07	0.000328039	1.92647e-07	5.28675e-07	0.00467663	0.00721278	0.000491858	0.000865185	0.00498218	0.00735117		0.00123492	0.000764481	0.00365433
143	E<->W	2	5.12055e-07	4.35602e-07	4.47215e-07	5.09653e-07	5.45162e-07	4.57585e-07	5.33607e-07	4.33552e-07	5.09728e-07	4.21607e-07	4.50555e-07	5.95066e-07	4.5246e-07	4.6429e-07	5.25524e-07	4.80209e-07	5.12374e-07	5.61612e-07	5.53505e-07	0.000644349	0.000152824	4.50374e-07	5.20198e-07	5.26434e-07	5.51428e-07	5.62557e-07	5.43381e-07	0.00103792	0.000703583	0.00027141	5.81041e-07	5.58016e-07	0.000730383	0.00113273	4.48005e-07	1.92647e-07	5.28675e-07	3.80709e-07	4.82172e-07	0.00183717	1.71468e-07	0.00192728	0.000895237		0.000217413	0.000130209	0.000665893
144	G<->W	1	5.12055e-07	4.35602e-07	4.47215e-07	5.09653e-07	0.000131973	4.57585e-07	0.000546456	4.33552e-07	5.09728e-07	4.21607e-07	4.50555e-07	0.000220002	4.5246e-07	0.000550193	5.25524e-07	4.80209e-07	0.0012313	5.61612e-07	0.00101951	0.00154975	4.67824e-07	4.50374e-07	0.000452505	0.000132366	0.000470583	5.62557e-07	0.00112064	0.00044169	5.45832e-07	5.70753e-07	9.11828e-05	5.58016e-07	5.11645e-07	4.29037e-07	4.48005e-07	0.00131565	5.28675e-07	0.00298748	0.00212917	0.000822172	1.71468e-07	0.000327653	0.000605106		0.00037574	0.000257904	0.000981754
145	H<->W	3	0.00772044	0.0112878	0.00496535	5.09653e-07	0.00675419	0.00446304	0.0106281	0.0133786	0.0181888	0.0140525	0.00931299	0.00286393	0.00692169	0.017257	0.00704852	0.0030963	0.00211198	0.00686046	0.00557881	0.00886827	0.00319835	0.00279285	0.0147546	0.000542822	0.00175485	8.044e-05	0.00386503	0.00640266	0.0134234	0.00548376	0.00991348	5.58016e-07	0.00183522	0.00446695	4.48005e-07	0.0120437	0.00208383	0.00278109	0.00362614	0.00493302	0.00282092	0.00457666	0.0123986		0.00639857	0.00671996	0.00474575
146	I<->W	3	0.00371935	4.35602e-07	4.47215e-07	5.09653e-07	5.45162e-07	4.57585e-07	0.000115894	4.33552e-07	0.000192942	4.21607e-07	4.50555e-07	5.95066e-07	0.0009527	0.00103686	0.000854087	4.80209e-07	0.000300277	5.61612e-07	5.53505e-07	5.83919e-07	0.000880626	4.50374e-07	0.000335106	0.00351244	5.51428e-07	0.00120738	0.00127726	0.00102601	0.00297994	0.000148561	0.00199958	0.00409609	5.11645e-07	4.29037e-07	4.48005e-07	0.00376331	8.06282e-05	3.80709e-07	0.000321695	0.00169119	0.000121557	0.00475092	4.84868e-07		0.000822654	0.000789091	0.000995265
147	L<->W	1	0.00102087	0.00192864	0.0012148	5.09653e-07	0.00139365	0.000551079	0.0015166	4.33552e-07	0.00201242	0.00132934	0.0032165	0.0023123	4.5246e-07	0.000697531	5.25524e-07	4.80209e-07	0.00127171	0.000777912	0.00284373	5.83919e-07	0.00130891	0.00195664	0.00563128	0.00451967	0.00118066	0.00431108	0.00270069	0.00165652	0.00133469	0.00191087	0.00269734	5.58016e-07	5.11645e-07	0.000878041	0.000599266	0.00724968	0.00142809	0.00283344	0.00217777	0.00280033	0.00663087	0.0010935	0.0023583		0.00184532	0.0016674	0.00276033
148	K<->W	2	5.12055e-07	0.000700922	4.47215e-07	4.20973e-05	5.45162e-07	0.000379828	2.52236e-05	4.33552e-07	0.000368217	4.21607e-07	0.000291518	5.95066e-07	4.5246e-07	0.00084688	5.25524e-07	4.80209e-07	5.12374e-07	5.61612e-07	0.000621597	5.83919e-07	2.15058e-05	0.00014148	5.20198e-07	5.26434e-07	0.000453103	0.000181003	0.000394266	0.000161546	5.45832e-07	0.000144144	5.81041e-07	5.58016e-07	5.11645e-07	4.29037e-07	4.48005e-07	0.00308792	0.000950753	0.00177092	0.00133074	0.00106139	0.00210715	0.00078955	4.84868e-07		0.000369359	0.000218651	0.00114443
149	M<->W	2	5.12055e-07	4.35602e-07	0.00171139	5.09653e-07	0.000682815	0.00167535	0.00354022	4.33552e-07	5.09728e-07	4.21607e-07	0.00157848	0.000929428	4.5246e-07	4.6429e-07	5.25524e-07	4.80209e-07	0.00390157	5.61612e-07	0.00359416	0.00411342	0.00189139	0.00207797	0.00218141	5.26434e-07	0.00323293	0.00199617	5.43381e-07	5.23565e-07	0.00247208	5.70753e-07	5.81041e-07	5.58016e-07	0.00233496	4.29037e-07	4.48005e-07	0.0150588	5.28675e-07	3.80709e-07	0.00790311	0.00653054	1.71468e-07	0.0101148	0.00259817		0.00186348	0.00147172	0.00387824
150	F<->W	2	0.0198399	0.0107285	0.0156169	5.09653e-07	0.0191427	0.0119705	0.0126772	0.0117999	0.0230812	0.00860372	0.0109367	0.00606501	0.00678214	0.0150398	0.00701898	0.00799138	0.00749073	0.00657275	0.00904038	0.0102293	0.0126804	0.0110682	0.00290993	0.00737816	5.51428e-07	0.0111838	0.0141781	0.0131548	0.015744	0.0167956	0.0106424	0.0191181	0.0115663	0.0115818	0.0163913	0.0251276	0.0130186	0.033274	0.022686	0.0160108	0.0251372	0.0320173	0.0179789		0.0134947	0.0116708	0.0228747
151	P<->W	2	0.006834	0.00171714	4.47215e-07	5.09653e-07	5.45162e-07	4.57585e-07	5.33607e-07	4.33552e-07	0.00155548	4.21607e-07	4.50555e-07	5.95066e-07	0.00176522	0.000265774	5.25524e-07	4.80209e-07	5.12374e-07	5.61612e-07	5.53505e-07	0.00059701	6.55655e-05	0.00114131	0.00216292	0.000478318	0.000747085	0.000606138	5.43381e-07	0.00113329	5.45832e-07	5.70753e-07	0.000282398	5.58016e-07	5.11645e-07	4.29037e-07	4.48005e-07	1.92647e-07	0.00161124	3.80709e-07	0.00319585	0.00191955	0.00221003	3.67699e-07	4.84868e-07		0.000658148	0.000537846	0.00127684
152	S<->W	1	0.00359964	0.00167713	4.47215e-07	5.09653e-07	5.45162e-07	0.000899772	4.29393e-05	4.33552e-07	5.09728e-07	0.000619311	0.00169201	0.000188493	4.5246e-07	0.000495635	5.25524e-07	4.80209e-07	0.00172454	0.000143599	0.00124953	5.83919e-07	0.00198412	4.50374e-07	5.20198e-07	0.00111471	0.00306048	0.00398496	0.00120946	0.00182348	0.00575758	5.70753e-07	0.000964808	5.58016e-07	5.11645e-07	4.29037e-07	0.00106348	1.92647e-07	0.003954	0.00208528	0.00119458	0.00689903	1.71468e-07	3.67699e-07	4.84868e-07		0.00110319	0.000925094	0.00201913
153	T<->W	2	5.12055e-07	2.92202e-05	4.47215e-07	0.000770086	5.45162e-07	0.00120046	0.00266776	4.33552e-07	5.09728e-07	4.21607e-07	4.50555e-07	5.95066e-07	4.5246e-07	4.6429e-07	5.25524e-07	4.80209e-07	0.0020382	5.61612e-07	5.53505e-07	0.0013159	0.000429078	0.00065148	0.00161095	0.000845479	0.000639518	5.62557e-07	0.00316055	5.23565e-07	5.45832e-07	5.70753e-07	0.000836206	0.000368436	5.11645e-07	0.00111428	0.000908058	0.00566336	0.000341593	0.000869585	0.00466461	0.00296619	0.00281377	0.00159692	4.84868e-07		0.000872368	0.000673853	0.00189331
154	A<->Y	2	0.000957845	0.000199549	0.000639427	5.09653e-07	0.000666318	0.000298304	0.000662702	0.000464378	0.000537727	7.84948e-05	0.000171927	5.95066e-07	0.000310591	0.000501963	5.25524e-07	0.000947856	0.000101496	0.000797782	1.43579e-05	5.83919e-07	0.0015052	4.50374e-07	0.00223645	0.00089968	0.000172045	0.00117508	0.000399678	0.00178198	0.000275018	0.000554487	0.000433207	0.000552799	0.000526605	0.00105914	0.000919728	0.00289641	0.00108078	0.00106616	0.00144699	0.00172916	0.00181882	0.00177307	0.00085381		0.000756039	0.000631691	0.00139554
155	R<->Y	2	8.12836e-05	0.000387903	0.000182911	0.000126007	5.45162e-07	0.000226184	0.000441234	4.33552e-07	0.000205823	0.000523151	0.000910229	0.000680107	0.000403522	0.00035066	0.00102687	0.000952053	0.00235099	0.000434205	0.000917258	0.000720725	0.000861694	6.2602e-05	0.000477641	0.00050763	0.000712858	0.000751357	0.000741264	0.000766918	0.00125002	5.70753e-07	0.000739602	0.000635904	0.000974913	0.000643516	6.66139e-05	0.00527795	0.00212359	0.00366697	0.00426655	0.00261274	0.00162234	0.0012588	0.00200152		0.000998736	0.000705365	0.0025075
156	N<->Y	1	0.000580025	0.00206562	0.00177499	0.00595616	0.00156996	0.000131327	0.00283615	4.33552e-07	0.00191925	0.00032648	0.00110932	0.00218293	0.00420643	0.00336163	0.00340207	0.000828486	0.00181506	0.00459645	0.00259553	0.00515175	0.00562957	0.00147247	0.00187649	0.00126217	0.00171473	0.00496072	0.000748925	0.00228027	0.00136273	0.00348446	0.00419792	0.00480108	0.000984481	0.00344471	0.00491037	0.00571281	0.00447112	0.00335754	0.00272145	0.00415808	0.0012778	0.000678781	0.00234348		0.00265726	0.00264594	0.00271546
157	D<->Y	1	5.12055e-07	0.000674429	4.47215e-07	0.00286744	5.45162e-07	4.57585e-07	5.33607e-07	0.0024473	0.000123145	4.21607e-07	0.000148332	0.000213099	4.5246e-07	0.000564628	0.00043371	0.000365641	0.000166173	0.000175942	0.000291946	0.000770452	4.67824e-07	4.50374e-07	5.20198e-07	0.00144973	5.51428e-07	0.000433163	0.00110508	5.23565e-07	0.000808678	5.70753e-07	5.81041e-07	0.00431864	0.00201577	0.000341638	0.000300544	0.00363432	0.00104618	3.80709e-07	0.000684038	0.00106771	0.00179415	0.000968289	0.0010396		0.000703655	0.000657134	0.000942907
158	C<->Y	1	0.00506801	0.0100607	0.00601976	0.0159035	5.45162e-07	4.57585e-07	0.00660047	4.33552e-07	0.00445577	4.21607e-07	0.000480999	0.0180519	0.00921039	0.0121859	0.00993881	0.00917526	0.0110299	0.000784623	0.00218532	0.0053165	0.00840826	0.0136659	0.00690058	0.00649899	0.00571032	0.00921315	0.0075479	0.00622767	0.00383973	0.00224206	0.00657522	0.000117898	5.11645e-07	0.0259063	0.00533514	0.0085949	0.00606242	3.80709e-07	0.00433368	0.00177538	0.00869801	0.00231246	0.00620503		0.0063405	0.00675706	0.00419819
159	Q<->Y	2	0.00102717	0.00267147	4.47215e-07	5.09653e-07	0.00130563	4.57585e-07	0.00227088	0.000712587	5.09728e-07	0.000655017	4.50555e-07	0.00178857	0.00112496	0.00210737	0.00147173	0.000864919	0.00127416	0.000947614	0.000964422	0.00308222	0.0004875	0.0015267	5.20198e-07	0.00161847	5.51428e-07	0.00256269	0.00248612	0.00218173	0.00148725	0.00268567	0.000362134	0.00197376	0.00409502	0.00363143	0.000632422	0.00676557	0.00271728	3.80709e-07	0.00401526	0.00377496	0.00302016	0.00235337	0.00231959		0.00169697	0.00152135	0.00260014
160	E<->Y	2	0.000961266	4.35602e-07	4.47215e-07	0.000626104	5.45162e-07	4.57585e-07	0.000149554	4.33552e-07	0.000191474	4.65328e-05	4.50555e-07	5.95066e-07	0.00108331	0.000418776	0.00020734	4.80209e-07	5.12374e-07	0.0002967	0.00023555	5.83919e-07	4.67824e-07	4.50374e-07	5.20198e-07	5.26434e-07	5.51428e-07	0.000174331	9.51297e-05	5.23565e-07	0.000151474	5.70753e-07	5.81041e-07	0.000190306	0.000440746	0.000716556	2.69699e-06	0.00114661	0.0006276	0.000827783	0.000445908	0.00132547	1.71468e-07	0.000294983	0.00139993		0.000280591	0.000198433	0.00070312
161	G<->Y	2	0.000201852	4.35602e-07	4.47215e-07	5.19489e-05	5.45162e-07	4.57585e-07	0.000109624	0.000289314	5.09728e-07	4.21607e-07	4.50555e-07	4.03038e-05	9.78445e-05	4.6429e-07	5.25524e-07	4.80209e-07	5.12374e-07	0.000201411	0.000241018	5.83919e-07	4.67824e-07	4.50374e-07	2.55677e-05	5.26434e-07	0.000390074	2.21704e-05	5.43381e-07	5.23565e-07	5.45832e-07	5.70753e-07	1.32013e-05	5.58016e-07	0.00018323	4.29037e-07	0.000207798	0.00214434	0.000819282	0.00179346	0.00014213	0.00100231	0.000765732	0.000907229	0.000586012		0.000238286	0.000117504	0.00085945
162	H<->Y	1	0.0242042	0.0267919	0.0348232	0.0464836	0.0323368	0.032771	0.0228685	0.0234406	0.0231753	0.0145184	0.024452	0.0345237	0.0323959	0.0253194	0.0228289	0.0181938	0.0330376	0.0311475	0.0227908	0.0323751	0.0239629	0.031191	0.0323807	0.0208202	0.0346171	0.0328429	0.0255026	0.0266743	0.0325014	0.0308165	0.0312646	0.0320399	0.0254116	0.0201022	0.0235308	0.0172586	0.021001	0.0397192	0.0228341	0.0159736	0.0183163	0.0138569	0.024018		0.0268631	0.027761	0.0222456
163	I<->Y	2	0.000520525	4.35602e-07	0.000124393	0.00114686	5.45162e-07	0.000615685	0.00092052	4.33552e-07	0.000843692	0.000363902	0.000363093	0.00140797	0.000557522	0.00110351	0.000535073	0.00210904	0.00132106	0.00089913	0.00140018	0.000542776	0.000472535	4.50374e-07	0.000116779	9.91064e-05	5.51428e-07	0.00080759	0.00126789	0.000153054	0.000696809	0.000464559	0.00125628	0.000403362	0.00196066	0.00111655	4.48005e-07	0.0011259	0.000924932	3.80709e-07	0.000689462	0.00339508	0.00322117	0.000559613	0.00141327		0.000812158	0.000686635	0.0014577
164	L<->Y	2	0.00446281	0.00164109	0.00248232	0.000628555	0.00281437	0.00290449	0.00134086	0.000920874	0.00115149	0.00272434	0.000956294	0.000322169	0.000581013	0.00350457	0.00518731	0.00293378	0.00238325	0.00203385	0.00139664	0.000381287	0.00121366	4.50374e-07	0.00025395	5.26434e-07	0.00128456	0.000172328	0.000963539	0.000951663	0.000689097	0.00199135	0.0015899	0.00104929	0.00130349	0.00249628	0.00244673	0.00632125	0.00394565	0.0047031	0.00400576	0.00351812	0.00217246	0.00322788	0.00278773		0.00204279	0.00176332	0.0034801
165	K<->Y	2	5.12055e-07	0.000394311	0.000154285	0.000110039	5.45162e-07	0.000555819	0.000325367	4.33552e-07	4.33371e-05	0.000209193	0.000322381	5.95066e-07	4.5246e-07	0.000610658	0.000490015	0.000423568	5.12374e-07	0.000190139	0.000917341	0.000165827	0.000172416	0.000105306	0.00026269	1.50455e-05	0.000676414	0.000527076	5.43381e-07	0.00036127	5.45832e-07	7.55278e-05	0.000505611	7.42273e-05	9.98168e-05	4.66792e-06	4.48005e-07	0.00368457	0.00146471	0.00176035	0.000497669	0.00211075	0.00158758	0.000461944	0.000562476		0.000463418	0.000318931	0.0012065
166	M<->Y	3	0.00545996	0.00328737	4.47215e-07	5.09653e-07	0.00154239	0.00035294	0.00410504	4.33552e-07	0.000704882	0.000293181	0.00189814	0.00243465	0.00195369	0.00119071	0.000950358	0.00314086	0.00271775	0.00190744	0.00135321	5.83919e-07	0.0013479	0.000261303	0.00240771	5.26434e-07	0.00100838	0.00105051	6.93517e-05	0.00404549	0.0027166	0.00293777	0.00171326	0.0029008	0.00256249	4.29037e-07	0.000454954	0.00594618	0.000344775	0.00430801	0.000325263	0.00384648	0.00336878	0.00110853	0.00121966		0.00179627	0.00174217	0.0020745
167	F<->Y	1	0.0584208	0.0710852	0.0732671	0.0958346	0.0683048	0.0750603	0.0736115	0.0888134	0.0818413	0.0615289	0.0718308	0.0614311	0.0677211	0.0733773	0.0683055	0.077113	0.0520613	0.0698796	0.0681031	0.0720909	0.0691538	0.0397211	0.0521723	0.0617536	0.0560463	0.0692518	0.0601647	0.0610714	0.059155	0.0562431	0.0650074	0.0653672	0.0656687	0.069593	0.0762281	0.0529883	0.0656961	0.054708	0.0502642	0.0508912	0.0508663	0.0496083	0.0527708		0.0647459	0.0669241	0.0535436
168	P<->Y	2	5.12055e-07	4.35602e-07	0.000875736	0.000200701	0.000487838	4.57585e-07	5.33607e-07	4.33552e-07	0.000901179	4.21607e-07	4.50555e-07	5.95066e-07	4.5246e-07	0.000363567	5.25524e-07	4.80209e-07	0.00122014	0.000175167	0.00038157	0.000478732	4.67824e-07	4.50374e-07	0.000515105	5.26434e-07	0.00017027	0.00014856	0.000365233	0.000173017	5.45832e-07	5.70753e-07	5.81041e-07	0.000264494	0.000427807	4.29037e-07	4.48005e-07	0.00106339	0.000263396	0.00072069	0.000496333	0.00287389	7.71742e-05	0.000642198	0.000297011		0.000316105	0.000228384	0.000767242
169	S<->Y	1	0.00398142	4.35602e-07	0.00199927	0.00160773	0.000956459	0.00108336	0.00286609	4.33552e-07	0.000505293	0.00034229	0.00101791	0.00577726	0.000202019	0.00247563	0.00214978	4.80209e-07	0.000582943	0.0022875	0.00361906	0.0021802	0.0048116	0.000967331	0.00477502	0.00260659	0.0014344	0.00272938	0.000817038	0.00245846	0.0048727	0.00303009	0.00372214	0.00115788	0.00159294	0.00248135	0.00328789	0.00357064	0.00666344	0.000245702	0.0062875	0.00527687	0.00163335	0.000567162	0.00104032		0.0023178	0.00216531	0.00310205
170	T<->Y	2	0.000152162	0.000519869	5.31425e-05	5.09653e-07	5.45162e-07	0.000352135	0.00129974	4.33552e-07	0.00242485	0.00119586	0.00127963	0.00106666	0.000576131	0.00173731	5.25524e-07	0.00227058	0.00149897	0.000358758	0.00338313	0.00380305	0.00195874	0.000204411	0.00171743	0.00169903	0.00189393	0.000225552	0.00289672	0.00149739	0.000179617	0.000786361	0.0021519	0.000129677	0.000570453	0.00196555	0.000295227	0.0027013	5.28675e-07	0.000908897	0.000522409	0.00199542	0.00110593	0.00598023	0.00337773		0.0013195	0.0011902	0.00198445
171	W<->Y	2	0.0134441	0.0131393	0.0186306	0.00229534	0.0171741	0.0123558	0.0196358	0.00616883	0.0195688	0.0157414	0.023116	0.0138662	0.00763937	0.0162293	0.0144971	0.00297175	0.0184996	0.00841906	0.0122305	0.0108393	0.022081	0.011094	0.0017254	0.00849935	0.00761784	0.0175356	0.0264832	0.0125005	0.0143049	0.0158897	0.0199958	0.0130634	0.011238	0.0159759	0.0166572	0.0187143	0.0210489	0.0349208	0.0201489	0.0217195	0.0172714	0.0113709	0.0165703		0.0149509	0.0138844	0.0204358
172	A<->V	1	0.00855325	0.00764816	0.00752258	0.00718709	0.00600369	0.00628508	0.00954716	0.0102241	0.00720603	0.0062402	0.00730773	0.0126702	0.00690847	0.00867023	0.00870266	0.00846621	0.0109602	0.00715181	0.0131342	0.0149413	0.00852238	0.0153215	0.0159979	0.0137786	0.00936945	0.0157665	0.0118313	0.0124754	0.0136515	0.0131926	0.0106111	0.00990287	0.00994538	0.00974509	0.00749371	0.00630029	0.00843835	0.00870794	0.0139711	0.0107748	0.00607299	0.00515515	0.00785703		0.0097724	0.00997878	0.00871105
173	R<->V	2	0.000586104	0.000440751	0.000277447	0.000324705	0.000514464	0.00069994	0.000344678	0.00037527	0.000199523	4.21607e-07	0.000460134	0.000647569	0.000258599	0.000470962	0.000374199	0.000299982	0.000364692	0.000556934	0.000522791	0.000261707	0.000324932	0.000660446	0.00065971	0.000408586	0.00036874	0.000177453	0.000363614	0.000167096	0.000285896	0.00027968	0.000729399	0.000837621	0.000715335	0.000435511	0.000328841	0.00104343	0.00165452	0.00103748	0.000705456	0.00170104	0.000305902	0.00114108	0.000663921		0.000534339	0.000437977	0.00102991
174	N<->V	2	0.000626832	0.000505651	4.47215e-07	0.000641939	9.39422e-05	0.000468901	0.000412217	0.000245686	0.000198921	0.000804203	0.00147988	0.000553822	0.000173084	0.000794693	0.000139001	0.00128544	0.000902454	0.000375842	0.000843985	0.000316309	0.000527097	0.000563008	0.00110671	0.0004934	0.00176064	0.000478725	0.000923041	0.000986941	0.00186909	8.20286e-05	0.000255095	0.000735727	0.00141571	0.00141223	0.00123806	0.00114668	0.000480412	0.000521693	0.000227021	0.000581231	0.000190295	0.00144887	9.0394e-05		0.000683659	0.000718262	0.000505702
175	D<->V	1	0.000309317	0.000326126	4.47215e-07	0.000380053	6.46398e-05	4.57585e-07	0.000237396	0.000557861	4.47031e-06	4.21607e-07	4.90069e-05	5.95066e-07	0.000348313	0.000116207	0.000382608	4.80209e-07	0.000318763	0.000233462	0.00010521	7.68904e-05	3.55031e-05	0.000238757	0.000153209	5.26434e-07	5.51428e-07	0.000210441	0.000164373	0.000265725	5.45832e-07	5.70753e-07	7.42222e-05	0.000481919	5.11645e-07	0.000373597	8.0193e-05	0.00333193	0.00113511	0.00211903	0.000522346	0.0007877	0.000622243	0.00199287	8.92885e-05		0.000376602	0.000247925	0.00103837
176	C<->V	2	0.0110396	0.00442368	0.00563723	0.00209092	0.009155	0.00917406	0.0102501	0.000310558	0.0128321	0.0114164	0.0148211	0.00585599	0.0203963	0.0150201	0.0171083	0.0162311	0.0121831	0.00556258	0.00834488	0.00156862	0.00729764	0.0102266	0.00130378	0.00680743	0.0153263	0.00662041	5.43381e-07	0.0074867	0.00399015	0.00519645	0.00610453	0.00328079	0.0162145	0.0168924	0.0233461	0.00733654	0.0111922	0.0151922	0.00997269	0.00466353	0.0122704	0.0182444	0.0143636		0.0096919	0.00919035	0.0122713
177	Q<->V	2	0.00303221	0.00264304	0.00283477	7.19273e-05	0.00123076	0.00345422	0.00189771	0.000903137	0.00235463	0.00208914	0.00187694	0.000734924	0.00241903	0.00329912	0.00232852	0.00153281	0.00123669	0.00100551	0.000954204	0.00132164	0.00154174	0.00446755	0.000952004	5.26434e-07	0.00140121	0.000651688	0.00145578	0.00195108	0.00354835	0.00221552	0.000854323	0.00301732	0.00126857	0.0029278	0.00145779	0.000928166	0.000189519	0.00158721	0.0016374	0.00210062	0.00232506	0.0024342	0.00291735		0.00183841	0.00182945	0.00188448
178	E<->V	1	0.00231713	0.0018014	0.00105936	0.00139554	0.00113432	0.00137829	0.00122536	0.000942981	0.00138778	0.000670566	0.00123436	0.00177001	0.00328573	0.00231836	0.00224561	0.000718676	0.00127376	0.00163435	0.00150854	0.00125161	0.00117727	0.00199418	0.00175618	0.00181427	0.00127445	0.00249313	0.00189515	0.00273728	0.00100798	0.00116735	0.00200895	0.00180799	0.00267918	0.00261273	0.00128449	0.00276613	0.00184948	0.0018236	0.000889453	0.00179486	0.00193161	0.00327156	0.00128671		0.00171809	0.00169529	0.00183532
179	G<->V	1	5.12055e-07	0.000203021	6.77038e-05	0.000541919	8.63154e-05	4.57585e-07	1.1734e-05	0.000266262	5.09728e-07	5.82113e-05	8.02168e-05	0.000107029	0.000106649	3.54532e-05	5.25524e-07	4.94615e-06	0.000245263	5.61612e-07	0.000239491	5.83919e-07	2.74425e-05	7.1605e-05	5.20198e-07	5.26434e-07	6.64636e-05	1.37489e-05	5.43381e-07	5.23565e-07	0.000252906	0.000184456	0.000165138	5.58016e-07	5.11645e-07	3.94585e-05	8.6026e-05	0.000380691	0.000466576	0.000131268	6.61057e-05	0.000224456	0.000128436	3.67699e-07	4.84868e-07		0.000101539	9.30134e-05	0.000145385
180	H<->V	2	0.00138467	4.35602e-07	4.47215e-07	0.000216434	0.000164612	0.000243806	0.00149325	0.000798174	0.00112044	0.000421316	0.000687186	5.95066e-07	0.00129054	0.00126596	0.00178133	4.80209e-07	0.000643531	2.21331e-05	0.000872424	0.00173685	0.000132216	0.000763614	0.0011138	0.000136346	5.51428e-07	0.000193047	5.43381e-07	5.23565e-07	5.45832e-07	0.000252638	0.000194916	0.000991316	0.000184535	0.00107602	0.00152665	0.00312653	0.00121605	0.00244529	0.00107994	0.00109467	0.000238388	0.000531469	0.000969722		0.000730557	0.000662178	0.00108222
181	I<->V	1	0.0474649	0.0527242	0.0571987	0.0567957	0.0508505	0.0463312	0.051733	0.0604542	0.0546462	0.0569708	0.0564881	0.0641149	0.0415778	0.0460097	0.0519586	0.0610378	0.05569	0.0594094	0.0601654	0.0657449	0.0494546	0.0658722	0.0582814	0.0552852	0.0584966	0.0502488	0.0585874	0.0533002	0.0598962	0.0581003	0.0490354	0.0675296	0.0654673	0.0567019	0.0476494	0.0266828	0.0459453	0.0527272	0.0498633	0.0416156	0.0399219	0.039781	0.043343		0.0532826	0.0549432	0.0447425
182	L<->V	1	0.00696991	0.010954	0.00718312	0.00870197	0.0100656	0.0103342	0.00976814	0.0118077	0.00768952	0.0080335	0.00993137	0.00813352	0.0064006	0.00935857	0.00774491	0.00943543	0.00952706	0.00907166	0.00904644	0.00576805	0.00647287	0.006795	0.00622372	0.00831583	0.00551417	0.00871365	0.00504302	0.00572883	0.00674197	0.00858675	0.00981803	0.0104664	0.0112079	0.0103184	0.0108195	0.007778	0.00801778	0.00899739	0.00784407	0.00769639	0.00692056	0.00729441	0.00937079		0.0083863	0.00845748	0.0080202
183	K<->V	2	0.000966156	0.000284714	0.00124875	0.000468091	0.000473347	0.000842771	0.000618392	0.000497545	0.000633668	0.000534952	0.000458904	0.000686986	0.000898364	0.0012073	0.00121651	0.00060138	0.000555967	0.000591108	0.000884783	0.000813913	0.000407297	0.000871316	0.00127966	0.000698657	0.000737049	0.000476193	0.00111496	0.000603623	0.000565979	0.000564286	0.000518527	0.000908283	0.000627583	0.000733593	0.000690152	0.00192383	0.000770073	0.000349274	0.00145674	0.0012366	0.000611553	0.00114818	0.000947913		0.0007843	0.000755683	0.000931476
184	M<->V	1	0.00472866	0.00415153	0.0109406	0.00468187	0.00448926	0.00527018	0.00689318	0.00513908	0.00507577	0.00670931	0.00424287	0.011339	0.00489062	0.00681997	0.00891748	0.00685005	0.00855061	0.00604207	0.00488661	0.00643415	0.00421064	0.0076555	0.00682373	0.00799701	0.0067799	0.00235605	0.00517344	0.00612897	0.00572637	0.0061455	0.0107884	0.00327969	0.00453313	0.00664254	0.00535833	0.00202867	0.00252407	0.00301228	0.00443617	0.0062146	0.00851153	0.00348524	0.00410657		0.00583654	0.00607447	0.00461292
185	F<->V	1	0.000594752	0.00155675	0.000826806	0.00309531	0.00243247	0.00135566	0.00255863	0.00177234	0.00311993	0.00233609	0.00243812	0.00298358	0.00112723	0.0026224	0.00238017	0.00256602	0.00293592	0.00151225	0.00281822	0.00297794	0.00168632	0.00215181	0.00153055	0.00177751	0.00119832	0.00221758	0.00149359	0.00200716	0.00102636	0.0015292	0.00242028	0.000791161	0.00229714	0.000859317	0.00402641	0.00438176	0.00181586	0.00181482	0.00404561	0.00366561	0.00264987	0.00552156	0.00217214		0.00225792	0.00209458	0.00309792
186	P<->V	2	0.000996751	0.000646376	0.0002271	0.000472708	0.000661406	0.000530144	0.00130879	0.000349925	0.00150652	0.000816164	0.00128728	0.00100673	0.000778227	0.00160871	0.0011229	0.000810122	0.00142536	0.000982816	0.000454965	0.00103542	0.00131011	0.000727363	0.000913546	0.000780743	0.00126992	0.00150792	0.00115389	0.000904956	0.00143165	0.0013959	0.000749886	0.00138896	0.000836012	0.00136507	0.00112008	0.00370448	0.00106205	0.000990018	0.00194685	0.00225408	0.00128618	0.00144236	0.00138988		0.00113861	0.00107191	0.00148163
187	S<->V	2	5.12055e-07	4.35602e-07	4.47215e-07	0.000328217	5.45162e-07	0.000578159	0.000164911	4.33552e-07	0.000619585	4.21607e-07	0.00127435	0.000166737	0.000142878	0.000531311	0.000180018	4.80209e-07	0.000956146	0.000963199	0.000386081	5.83919e-07	0.000342643	0.000111085	0.00131374	0.000208778	0.000545991	0.000589695	0.000844359	0.00107903	5.45832e-07	5.70753e-07	0.000160948	0.000467383	0.000529598	0.000201068	0.000455707	0.00373097	0.00111458	0.0001833	0.000871096	0.000870042	0.00138734	0.00281786	0.00116138		0.00058798	0.000468821	0.0012008
188	T<->V	2	0.0113678	0.00898003	0.00674122	0.00395793	0.00811143	0.00929792	0.0105761	0.0110484	0.0102898	0.014283	0.00920736	0.00974012	0.00912917	0.00943727	0.00912894	0.0109428	0.0111923	0.00812083	0.0117089	0.0159241	0.00836326	0.0146514	0.0121976	0.00940045	0.00952569	0.0111669	0.0121488	0.0102547	0.00726148	0.00821899	0.00825997	0.00953186	0.0112791	0.0114579	0.00914343	0.00790189	0.00957318	0.00811369	0.0097637	0.00990283	0.0104988	0.0102122	0.00983482		0.00994995	0.00999858	0.00969989
189	W<->V	2	5.12055e-07	4.35602e-07	4.47215e-07	0.000254623	0.00204708	0.000437666	0.000193288	4.33552e-07	0.0011475	4.21607e-07	4.50555e-07	0.00055791	4.5246e-07	0.000421107	0.000215586	4.80209e-07	0.000665179	0.00029274	0.000428607	0.00101818	0.000709904	4.50374e-07	5.20198e-07	5.26434e-07	5.51428e-07	5.62557e-07	0.000215043	9.40689e-05	5.45832e-07	0.00135466	0.000719393	5.58016e-07	5.11645e-07	0.00217569	0.000507079	1.92647e-07	5.28675e-07	0.000407145	4.82172e-07	0.000774078	0.00195893	0.0062742	0.000459699		0.000542754	0.000373982	0.00141072
190	Y<->V	2	0.0011988	0.00101981	0.001047	0.00119318	0.00127631	0.00107128	0.00124926	0.00101502	0.00119335	0.000987049	0.00105482	0.00139314	0.00105928	0.00108698	0.00123034	0.00112425	0.00119955	0.00131482	0.00129584	0.00136705	0.00109525	0.0010544	0.00121787	0.00123247	0.00129098	0.00131704	0.00127214	0.00122575	0.00127788	0.00133622	0.00136031	0.0013064	0.00119784	0.00100444	0.00104885	0.000451017	0.00123771	0.0008913	0.00112884	0.000644501	0.000401433	0.000860843	0.00113515		0.00112479	0.0011685	0.000899969

## Sheet: 1. general bact-AE
#	Exchange	Min subs	NM_Xanthomonadaceae	NM_Selenomonadales	NM_Oceanospirillales	NM_Micrococcineae	NM_Lactobacillales	NM_Enterobacteriaceae	NM_Cytophagales	NM_Comamonadaceae	NM_Chromatiales	NM_Alteromonadaceae	NM_Rhodospirillales	NM_Bacillaceae	NM_DPANN	NM_Thermoprotei	NM_Thaumarchaeota	NM_Pizizomycotina	NM_Methanomicrobia	NM_Halobacteriaceae	NM_Coelomata		mean	mean bact	mean Arch + Euk		Difference bact-AE
1	A<->R	2	0.00196005	0.00140388	0.00166581	0.0028194	0.00136502	0.000991351	0.00141429	0.00184559	0.00227	0.00161474	0.00250026	0.00138271	0.00133355	0.00139938	0.00144387	0.00196955	0.00175493	0.00204563	0.00213		0.00175316	0.00176942	0.00172527		4.4152e-05
2	A<->N	2	0.001132	0.000775325	0.00128635	0.00127064	0.0012583	0.000842833	0.001169	0.000935	0.0011216	0.00124	0.00135904	0.000514392	0.00081419	0.000736123	0.000835679	0.00118685	0.00050091	0.00121608	0.00133		0.00102759	0.00107537	0.00094569		0.000129682
3	R<->N	2	0.00255378	0.00309054	0.0032685	0.00328993	0.00340566	0.00255303	0.00422	0.00222	0.00269	0.00322	0.00334407	0.00401342	0.00337908	0.00450301	0.0031637	0.00317346	0.00333557	0.00385324	0.0036009		0.00330936	0.00315574	0.00357271		-0.000416965
4	A<->D	1	0.00224469	0.00210929	0.00188336	0.00206859	0.00169411	0.00240542	0.00147	0.00228861	0.00258	0.00192	0.00202626	0.00100434	0.00106	0.000453529	0.00177991	0.00167629	0.000884931	0.0024025	0.00208		0.00179115	0.00197456	0.00147674		0.000497819
5	R<->D	2	0.000317923	0.000161717	0.000273865	0.000637054	0.00014314	9.86e-05	0.000166318	0.000216	0.000275	0.000127	0.000436101	0.000223148	0.000438	0.000326413	0.000555321	0.000523706	0.000176855	0.000436851	0.000669		0.000326422	0.000256322	0.000446592		-0.00019027
6	N<->D	1	0.0220562	0.0245361	0.0212869	0.0182419	0.0234396	0.0243	0.0179	0.022	0.0232	0.0216	0.0213155	0.0247626	0.0262665	0.029571	0.0280407	0.0210848	0.0254957	0.0212653	0.0247		0.0232138	0.0220532	0.0252034		-0.00315019
7	A<->C	2	0.00944731	0.0143249	0.0139665	0.01329	0.022741	0.00500441	0.0155	0.00806	0.00883	0.0131	0.0138263	0.0194908	0.0208	0.0117957	0.0104831	0.00929385	0.0141251	0.00938	0.0114		0.0128873	0.0131318	0.0124682		0.000663518
8	R<->C	1	0.00633066	0.00799701	0.00472959	0.00166573	0.00411	0.0107	0.00272	0.00514	0.00792	0.0041	0.00200729	0.00309365	0.00162	0.00112326	0.0039634	0.00412198	0.00346187	0.0082124	0.00387		0.00457299	0.00504283	0.00376756		0.00127527
9	N<->C	2	0.00324716	0.00205251	0.00267668	0.00435095	0.00210495	0.0018	0.00103	0.00201	0.00169	0.00228	0.0026458	0.00106313	0.0017	0.00143668	0.00195349	0.00234612	0.00266	0.00203	0.00271		0.00219934	0.00224593	0.00211947		0.00012646
10	D<->C	2	0.000144845	0.000401613	0.000188543	9.38e-05	0.000256	9.94e-05	0.00023	0.000131	0.000167	0.000267	0.000209564	0.000281939	0.000417	0.00171	0.000406875	0.00025358	0.000132107	0.000113	0.000451		0.000313382	0.000205892	0.000497652		-0.00029176
11	A<->Q	2	0.00455689	0.00445222	0.00453771	0.00494093	0.00474	0.00339	0.00594	0.0045	0.0042	0.00491	0.00544966	0.00390788	0.00385	0.00454432	0.00301327	0.00427639	0.00347	0.0025883	0.00475		0.00431671	0.00462711	0.00378461		0.000842496
12	R<->Q	1	0.0113138	0.0130898	0.0105717	0.0118	0.010623	0.0113	0.00964	0.0139	0.0155	0.00953	0.0124194	0.0138206	0.0102	0.00853477	0.0127385	0.0128161	0.0139	0.0262	0.0136		0.0127104	0.011959	0.0139985		-0.00203946
13	N<->Q	2	0.00764424	0.00753728	0.00773	0.0097	0.00762	0.00539	0.00705	0.00699	0.00643	0.00788	0.00877684	0.00866886	0.0072	0.0115447	0.00681722	0.0064142	0.00702929	0.00923	0.00797		0.00776961	0.0076181	0.00802934		-0.000411243
14	D<->Q	2	0.00236246	0.00155139	0.0017	0.00227365	0.00184	0.00119	0.00149	0.00234	0.00175	0.00199	0.00212723	0.00149788	0.00222	0.00175762	0.00230363	0.00139	0.0013	0.00112	0.00255		0.00182915	0.00184272	0.00180589		3.68237e-05
15	C<->Q	3	0.000224169	0.000271	0.000279463	6.22e-05	5.93e-05	0.000568	0.000395	0.000215	0.000733	0.00048	0.000102223	6.03311e-05	0.000349	8.31e-06	0.000792	0.000222	0.000487	0.00135	0.000477		0.000375526	0.000287474	0.000526473		-0.000238999
16	A<->E	1	0.00520885	0.00651	0.00564362	0.00534	0.00573	0.00697	0.00508	0.0057	0.00642	0.00634	0.00593564	0.0045931	0.00337	0.00243684	0.00426	0.00488474	0.00494	0.00569	0.00525		0.00527909	0.00578927	0.00440451		0.00138476
17	R<->E	2	0.000713798	0.000671167	0.000733	0.00176	0.000572	0.000224	0.000288	0.000537		0.00059	0.0014246	0.000809082	0.00109	0.00186506	0.00131609	0.00101624	0.000823	0.00216	0.00193		0.00102427	0.00077172	0.0014572		-0.000685478
18	N<->E	2	0.0010691	0.00125901	0.00131	0.00132	0.00162	0.00122	0.00117	0.000839	0.00114	0.00153	0.00110742	0.0018746	0.00238	0.00301683	0.00272232	0.00145	0.00157	0.00194	0.00257		0.00163728	0.00128826	0.00223559		-0.000947332
19	D<->E	1	0.0242543	0.0225	0.0207	0.0192	0.0188	0.0287	0.0217	0.0292	0.0214	0.0224	0.0215161	0.0213427	0.0217	0.0222804	0.0299	0.0291	0.0217	0.0166	0.0271		0.0231628	0.0226428	0.0240543		-0.00141158
20	C<->E	3	1.91e-06	2.56e-05	3.85e-07	2.86e-07	5.83e-07	5.05e-07	2.67e-07	2.59e-07	5.51e-06	1.04e-06	9.43355e-08	4.76627e-07	1.09e-05	8.68e-07	2.21e-05	2.02e-06	4.45e-06	1.06e-05	3.13e-05		6.27126e-06	3.07633e-06	1.17483e-05		-8.67196e-06
21	Q<->E	1	0.017027	0.0158	0.0136033	0.0181299	0.0148	0.0132633	0.0123412	0.0173357	0.0154017	0.0146926	0.0175579	0.0144399	0.0169542	0.0204796	0.0208	0.0157774	0.0168032	0.0142042	0.0196175		0.0162647	0.015366	0.0178052		-0.00243913
22	A<->G	1	0.00783584	0.00996904	0.00900004	0.00765613	0.0105897	0.00920048	0.0111694	0.0082709	0.00922938	0.00968822	0.00858279	0.0130476	0.010811	0.0105273	0.0114541	0.00989326	0.0106	0.00900924	0.0107734		0.00985831	0.00951996	0.0104383		-0.000918363
23	R<->G	1	0.00222043	0.00169981	0.00151058	0.00209	0.00138424	0.00213413	0.00243917	0.00236566	0.00244524	0.00141	0.00177445	0.00183994	0.00249091	0.00212252	0.00330921	0.00294421	0.00213784	0.00188826	0.00276317		0.0021563	0.0019428	0.0025223		-0.000579497
24	N<->G	2	0.0100035	0.00937723	0.00974	0.00793528	0.00869127	0.00923622	0.00945871	0.00900483	0.00832	0.00945763	0.00983811	0.00902788	0.00860317	0.0137192	0.00706285	0.00877898	0.00896828	0.00627293	0.00719375		0.00898368	0.00917422	0.00865703		0.000517191
25	D<->G	1	0.00617509	0.00554126	0.00509021	0.00522839	0.00465044	0.00608899	0.00504708	0.00615306	0.00639057	0.00531842	0.005507	0.00586397	0.00481568	0.00481621	0.006906	0.00551	0.00649882	0.00737331	0.00489		0.00567708	0.00558788	0.00583		-0.000242128
26	C<->G	1	0.00345149	0.00428	0.00272088	0.00173398	0.00253985	0.00549621	0.00333638	0.00382	0.00352215	0.00307	0.00232682	0.00359919	0.00341434	0.00364001	0.00466	0.00288492	0.0041942	0.00310025	0.00344284		0.00343334	0.00332475	0.00361951		-0.000294763
27	Q<->G	2	0.00189992	0.0015343	0.00151799	0.00189015	0.00151609	0.00119192	0.00186	0.00167964	0.00157	0.00138	0.00173488	0.00149229	0.00163542	0.00141051	0.0012435	0.00189809	0.00180572	0.00234655	0.00153982		0.0016393	0.0016056	0.00169709		-9.14913e-05
28	E<->G	1	0.00156452	0.00143147	0.00125398	0.00135912	0.00106319	0.00202973	0.00141154	0.00157762	0.00163	0.00104048	0.00129612	0.0017332	0.00204	0.00168404	0.0032857	0.00240197	0.00248267	0.00169932	0.00243		0.00175867	0.00144925	0.0022891		-0.000839853
29	A<->H	2	0.00167984	0.00101365	0.00163033	0.00224213	0.00164186	0.000916	0.00206253	0.00136	0.0015511	0.00173	0.00203773	0.00141088	0.001608	0.00149211	0.00144505	0.00150577	0.000789148	0.00159511	0.00175		0.00155059	0.00160634	0.00145503		0.000151311
30	R<->H	1	0.0133048	0.017787	0.0112994	0.0106971	0.0173215	0.0173058	0.01	0.0135	0.0128	0.0103	0.0105773	0.012767	0.0105839	0.0101	0.0131795	0.013038	0.0146002	0.0154	0.0117537		0.012964	0.0131383	0.012665		0.000473291
31	N<->H	1	0.026721	0.0278871	0.0244079	0.029339	0.0266	0.0278406	0.0248	0.0320343	0.0282	0.0236	0.0251442	0.0282931	0.0218	0.0232967	0.0201179	0.0233454	0.0258327	0.0285427	0.0218		0.0257686	0.0270723	0.0235336		0.00353863
32	D<->H	1	0.00398743	0.00255618	0.00311589	0.00394335	0.00284649	0.00318	0.0033009	0.00421	0.00396	0.00318	0.0035207	0.00408029	0.00346	0.00390533	0.00452072	0.00368345	0.00212	0.00210354	0.00466		0.00349128	0.0034901	0.00349329		-3.1901e-06
33	C<->H	2	0.00474001	0.00393291	0.00418059	0.00279	0.00167626	0.00355	0.00411	0.00463	0.00625	0.00345	0.00345472	0.0030676	0.00273733	0.00265	0.00423387	0.00351274	0.00403631	0.00624	0.00332		0.00381907	0.00381934	0.00381861		7.32341e-07
34	Q<->H	1	0.0199454	0.020055	0.0173	0.0180615	0.0168	0.0200626	0.0189	0.02	0.0224	0.017	0.0195497	0.0206395	0.0221	0.0209	0.0271494	0.0252751	0.0244849	0.0215	0.0243		0.0208644	0.0192262	0.0236728		-0.00444662
35	E<->H	2	0.00114978	0.00109025	0.00125524	0.00190329	0.00146	0.000909	0.00118	0.00114	0.00104	0.0017	0.00120772	0.00176867	0.00143	0.00155457	0.0016179	0.00134	0.000868	0.00126588	0.00209		0.00136686	0.001317	0.00145234		-0.00013534
36	G<->H	2	0.00217046	0.00262	0.00174308	0.00199	0.00325927	0.00202	0.0009	0.00224	0.00175	0.00134	0.00199918	0.00144234	0.00187	0.00183693	0.00143	0.00210348	0.00203	0.00143	0.00172		0.0018892	0.00195619	0.00177434		0.00018185
37	A<->I	2	0.000160387	0.000124955	0.000183	0.000147	0.000245	0.000221	0.000409	9.53e-05	0.000146	0.000291	0.00017909	0.000271838	0.000745	0.000354968	0.000679287	0.000463846	0.000165142	6.9e-05	0.000887		0.000307253	0.000206131	0.000480606		-0.000274475
38	R<->I	1	0.000169337	0.000279853	0.000312	0.000223973	0.000512	0.000263	0.000441	8.59e-05	0.000163	0.000451	0.000279362	0.000405016	0.000705	0.000377122	0.000792296	0.00046	0.00033	0.000159	0.000816		0.000380256	0.000298787	0.000519917		-0.00022113
39	N<->I	1	0.000839756	0.000256	0.000428792	0.000548	0.000467	0.000636	0.00036	0.000654	0.000525	0.000391	0.00066975	0.000310281	0.000718	0.000468	0.00092	0.00109	0.000517	0.000479	0.00152		0.000620925	0.000507132	0.000816		-0.000308868
40	D<->I	2	4.55e-05	2.03e-05	2.53e-05	2.4e-05	1.6e-05	1.67e-05	2.99e-05	3.39e-05	1.88e-05	7.6e-06	5.61724e-06	6.26377e-06	4.16e-05	1.58e-05	0.000166	0.000173887	2.08e-05	2.55e-05	0.000136		4.36562e-05	2.08234e-05	8.27981e-05		-6.19747e-05
41	C<->I	2	0.00104699	0.000925721	0.00155	0.000656	0.00127	0.00215	0.000719	0.000799	0.0011	0.00196	0.00132344	0.000705223	0.00119	0.000233983	0.00132239	0.00169	0.000889	0.000274	0.00176		0.00113499	0.00118378	0.00105134		0.000132442
42	Q<->I	2	0.000197972	9.37e-05	0.00014	0.000177	0.000149	0.000108	0.000294	4.77e-05	9.78e-05	0.000166	0.000210935	8.47198e-05	0.000413	0.000301747	0.00031967	0.000278	0.000184	0.000172	0.00052		0.000208171	0.000147236	0.000312631		-0.000165395
43	E<->I	2	7.27e-05	5.79e-05	6.88e-05	4.27e-05	9.65e-05	9.69e-05	0.00013	5.63e-05	2.66e-05	9.24e-05	5.5024e-05	3.30327e-05	0.000276	0.000157405	0.000267	0.000163	6.18e-05	1.3e-05	0.000359		0.000111898	6.90714e-05	0.000185315		-0.000116244
44	G<->I	2	7.85e-05	1.22e-05	3.93e-05	5.38e-05	3.03e-05	9.34e-05	5.13e-06	8.1e-05	2.25e-05	5.49e-05	1.24308e-05	2.90594e-05	4.52e-05	6.29e-06	8.41e-05	0.000115	7.87e-06	7.11e-05	0.000105		4.98463e-05	4.271e-05	6.208e-05		-1.937e-05
45	H<->I	2	0.000304028	0.000173	0.000274218	0.000202314	0.000241	0.000255	0.00067	0.000159	0.000175	0.000253	0.000296387	0.000169026	0.000402	0.000619282	0.000404	0.000686	9.67e-05	0.000289	0.000722		0.000336366	0.000264331	0.000459855		-0.000195523
46	A<->L	2	0.00127586	0.0011	0.00129468	0.00139	0.00147	0.00113	0.00132	0.00155	0.00113	0.00147	0.00144264	0.00150034	0.00188	0.0023615	0.00175	0.00191581	0.00106	0.00112	0.00222		0.00149373	0.00133946	0.00175819		-0.000418728
47	R<->L	1	0.00145319	0.00172323	0.00171	0.00161	0.00183	0.0019	0.00187	0.00183	0.00182	0.00175	0.00143475	0.00173625	0.00152	0.00125127	0.00176271	0.00216496	0.00174	0.00192	0.00185		0.00173033	0.00172228	0.00174414		-2.1851e-05
48	N<->L	2	0.000254713	0.000184481	0.000238	0.000465	0.000299	0.000108	0.000383	0.000186	0.00013	0.000221	0.000236324	0.000196578	0.000409	0.000497393	0.0004339	0.000476	0.00021	0.000185	0.000511		0.00029602	0.000241841	0.000388899		-0.000147058
49	D<->L	2	5.27e-05	4.48e-05	4.21e-05	4.96e-05	6.71e-05	2.26e-05	1.73e-05	2.37e-05	1.85e-05	3.88e-05	2.59882e-05	1.83729e-05	9.35e-05	7.08e-05	0.000239	0.000212	1.65e-05	2.13e-05	0.00014		6.39295e-05	3.51301e-05	0.0001133		-7.81699e-05
50	C<->L	2	0.00386208	0.00413	0.00514672	0.00406958	0.00535	0.00376432	0.00425605	0.00454	0.00463	0.00448987	0.00436177	0.00457077	0.00243	0.00112	0.00291	0.00484045	0.00398975	0.0111	0.00331		0.00436165	0.00443093	0.00424289		0.000188046
51	Q<->L	1	0.00257752	0.00220851	0.00257296	0.00220116	0.00236	0.00318	0.00315	0.00316	0.0027795	0.00245	0.0026069	0.0018712	0.00281099	0.00284867	0.00326069	0.00320284	0.00312	0.00145405	0.00368		0.00271026	0.00259315	0.00291103		-0.000317888
52	E<->L	2	0.000141673	0.000182228	0.000218755	0.000177	0.000270615	0.000121983	0.000241	0.00017	0.000126	0.0002	0.000159471	0.00012583	0.000382	0.000507466	0.000481829	0.000427867	0.000177	6.03e-05	0.000505815		0.000246149	0.00017788	0.000363182		-0.000185303
53	G<->L	2	0.000276849	0.000270133	0.0003	0.000327	0.000300584	0.000257	0.000181	0.000321349	0.000228	0.000278525	0.000262183	0.000272438	0.000248	0.000170897	0.000371976	0.000406852	0.000118971	0.000264342	0.000401		0.000276689	0.000272922	0.000283148		-1.02265e-05
54	H<->L	1	0.00167655	0.000740863	0.00204	0.00190667	0.00119083	0.00137	0.00178373	0.00209	0.00154201	0.00176	0.00172101	0.00144328	0.00171	0.0022051	0.00195572	0.00232	0.00165464	0.00172	0.00234		0.00174581	0.00160541	0.00198649		-0.000381083
55	I<->L	1	0.02414	0.0246	0.0267657	0.0282414	0.0276	0.0223	0.0272	0.025	0.0262	0.0281	0.026542	0.0262244	0.0238895	0.0269467	0.0193	0.0251	0.0263693	0.0286	0.0201684		0.0254362	0.0260761	0.0243391		0.00173699
56	A<->K	2	0.00274682	0.00292	0.00294309	0.00302802	0.00316	0.00224874	0.00211	0.00211423	0.00217	0.00338	0.00369028	0.00217805	0.00168	0.00166128	0.00182	0.0026262	0.00204	0.00224	0.00267		0.00249614	0.0027241	0.00210535		0.000618749
57	R<->K	1	0.0249122	0.0298794	0.0277172	0.0287	0.0265	0.0256	0.0312011	0.0303	0.0249	0.0301	0.0290303	0.0312743	0.027	0.036703	0.0332032	0.0315118	0.0312	0.0250222	0.0298		0.0291871	0.0283429	0.0306343		-0.00229143
58	N<->K	1	0.0113458	0.00808198	0.00869	0.011	0.00795257	0.0112	0.00637	0.0096	0.012	0.00944497	0.00898915	0.00907086	0.00870863	0.00808385	0.0131725	0.00884004	0.0113	0.0167	0.0105		0.0100553	0.00947878	0.0110436		-0.00156479
59	D<->K	2	0.000794642	0.000648765	0.000782	0.000814	0.000848	0.000476253	0.000473	0.000633	0.000703492	0.000737	0.00115713	0.000488963	0.000975	0.00056729	0.00156842	0.000865	0.000750023	0.000499	0.00139		0.000798473	0.000713021	0.000944962		-0.000231941
60	C<->K	3	1.14e-05	3.82e-05	3.44e-05	0.000177034	1.38e-05	1.35e-05	9.85e-05	3.19e-05	3.44e-05	7.78e-05	8.96637e-05	6.79628e-06	3.08e-05	0.000156107	0.000250021	3.7e-05	3.55e-05	0.000733725	0.000127192		0.000105144	5.22828e-05	0.000195764		-0.000143481
61	Q<->K	1	0.0130163	0.0163451	0.0142285	0.0159842	0.0147825	0.0138482	0.0117882	0.0140037	0.0162622	0.0145436	0.0150738	0.0158502	0.0113206	0.0112973	0.016398	0.0130743	0.0148368	0.0325648	0.0153772		0.0152945	0.0146439	0.0164099		-0.00176598
62	E<->K	1	0.00337293	0.00511217	0.00396946	0.00367375	0.005929	0.00374786	0.00287361	0.00203691	0.00408456	0.00429115	0.00485934	0.00525767	0.00658155	0.00629278	0.00997059	0.00600754	0.00623965	0.00907817	0.0092809		0.00540314	0.0041007	0.00763588		-0.00353518
63	G<->K	2	0.00172336	0.00164058	0.00162516	0.00148703	0.00121425	0.00126749	0.000903486	0.00155057	0.00159819	0.0016437	0.00215191	0.0012974	0.00180394	0.0019058	0.00187937	0.0015977	0.00195857	0.000874313	0.00157535		0.00156306	0.00150859	0.00165644		-0.000147844
64	H<->K	2	0.00243158	0.00490548	0.00281584	0.00295875	0.00545673	0.00277515	0.00223492	0.0014188	0.0019269	0.0031295	0.00294159	0.00284938	0.00264532	0.00238845	0.0032839	0.00192979	0.00279121	0.00206353	0.00334364		0.00285739	0.00298705	0.00263512		0.000351929
65	I<->K	1	0.000263618	0.000319022	0.000422636	0.000408718	0.000463714	0.000456266	0.000466489	0.000178115	0.000262582	0.000515	0.000210983	0.000409923	0.00070639	0.0005533	0.000902184	0.000454775	0.000441979	0.000484052	0.00110494		0.000474983	0.000364755	0.000663945		-0.00029919
66	L<->K	2	0.000407421	0.000512135	0.000720166	0.000736198	0.0010198	0.000324416	0.000751628	0.000485309	0.000296	0.000747081	0.000478131	0.000614486	0.00068135	0.000788923	0.000796057	0.000610778	0.00040399	0.000573812	0.000905413		0.000623847	0.000591065	0.000680046		-8.89816e-05
67	A<->M	2	0.00336082	0.00341101	0.00314843	0.00304866	0.00401864	0.00311449	0.00388989	0.00241722	0.00298665	0.00362	0.00357253	0.00467451	0.00612295	0.00756985	0.00391037	0.00426981	0.00360328	0.00303289	0.00562		0.003968	0.00343857	0.0048756		-0.00143702
68	R<->M	1	0.00134712	0.00178702	0.00149969	0.0012153	0.0022687	0.00120277	0.00204156	0.000878	0.00123	0.00132	0.00143447	0.00214552	0.00352238	0.00272391	0.00311471	0.00243708	0.00278991	0.00140528	0.00290965		0.00196174	0.00153084	0.00270042		-0.00116957
69	N<->M	2	0.0028847	0.00141339	0.0015698	0.00276532	0.00151773	0.00106742	0.00194	0.00171227	0.00183	0.00151	0.00236587	0.0015183	0.00172991	0.0022374	0.00181403	0.00215024	0.0012664	0.00166075	0.00227		0.00185387	0.00184123	0.00187553		-3.42984e-05
70	D<->M	3	0.000176398	0.000209876	0.000143584	0.000144736	0.000132399	0.000117495	0.000168733	0.000259	8.1e-05	5.88e-05	0.000128392	0.000106657	0.000139	0.000221559	0.000275308	0.000462611	0.000232478	0.000285602	0.000287		0.000191086	0.000143922	0.000271937		-0.000128014
71	C<->M	3	0.0047316	0.00484703	0.00453432	0.00615651	0.00667083	0.00261	0.000149	0.00315	0.00242	0.00491	0.00582258	0.00415662	0.00423745	0.00161944	0.00434921	0.00415699	0.00301878	0.00172495	0.00438751		0.00387646	0.00417987	0.00335633		0.000823541
72	Q<->M	2	0.00597443	0.00513721	0.00540478	0.00775268	0.00541051	0.00321316	0.00533	0.00383678	0.00463	0.00507	0.008117	0.00456111	0.0101	0.0117	0.00559508	0.00611164	0.00827778	0.00607	0.00889		0.00637801	0.00536981	0.00810636		-0.00273655
73	E<->M	2	0.00037926	0.000747041	0.000340355	0.00029252	0.000738	0.000354	0.000729329	0.00025	0.00026	0.000304	0.000404526	0.000457123	0.00105	0.00143542	0.000899271	0.000798306	0.00069501	0.000160567	0.00112		0.000600775	0.000438013	0.000879796		-0.000441783
74	G<->M	2	0.00061801	0.000958873	0.000461531	0.000781327	0.000680907	0.000647	0.00168	0.000479	0.000943	0.000556	0.000790181	0.000637479	0.00103195	0.000921	0.00104188	0.00134069	0.000835	0.000798	0.00099		0.000852201	0.000769442	0.000994074		-0.000224631
75	H<->M	3	0.00157675	0.000764329	0.00182447	0.00188	0.00122	0.000839745	0.000909	0.00136	0.00135	0.00146	0.00218751	0.000914607	0.00178	0.00328	0.00219635	0.00145631	0.0013513	0.00135	0.00238		0.00158318	0.0013572	0.00197057		-0.000613365
76	I<->M	1	0.0233233	0.0181915	0.0194	0.021509	0.0191	0.0247	0.0193	0.0224	0.0219	0.0208	0.0192887	0.0217204	0.0201	0.0147363	0.0195199	0.0227042	0.0185	0.0194444	0.0217		0.0204388	0.0209694	0.0195293		0.00144015
77	L<->M	1	0.0375268	0.0388582	0.041717	0.0387	0.0369806	0.0404	0.045	0.0389	0.0375	0.041	0.036891	0.0372859	0.0353	0.0323725	0.0319416	0.0348	0.0365	0.0296	0.0314		0.0369828	0.03923	0.0331306		0.00609938
78	K<->M	1	0.00255045	0.00243	0.00241	0.0023	0.00251	0.00228	0.00241	0.00198	0.00306	0.00277	0.00227637	0.00324785	0.00311	0.00318654	0.00278	0.00261648	0.00385687	0.00619	0.00397		0.00294392	0.00251872	0.00367284		-0.00115412
79	A<->F	2	0.000724646	0.00107032	0.00103	0.000813614	0.00113	0.000923	0.001	0.000609	0.000577	0.00108	0.000916543	0.00140732	0.00138	0.00162142	0.000927447	0.00112	0.00109	0.000906	0.00143		0.00103981	0.00094012	0.0012107		-0.000270575
80	R<->F	2	0.00011515	0.000128	0.000220163	7.24e-05	0.000317	0.000174	0.000249	0.000138	7.31e-05	0.000285	0.000134347	0.000112186	0.000372	9.01e-05	0.000499	0.000354	8.44e-05	0.000159	0.000349		0.000206623	0.000168195	0.0002725		-0.000104305
81	N<->F	2	0.000314085	0.000394	0.000403894	0.000651	0.000451	0.000161	0.000515	0.000408	0.000212	0.000305	0.000628291	0.000101046	0.000439	0.000401337	0.000602	0.000435643	0.00017	8.79e-05	0.000595		0.000382905	0.000378693	0.000390126		-1.14327e-05
82	D<->F	2	9.62e-05	0.000113805	9.54e-05	5.65e-05	0.000102	5.39e-05	2.58e-05	8.25e-05	4.62e-05	3.69e-05	5.33619e-05	1.74806e-05	0.000122	0.00017487	0.00014661	0.000318241	2.01e-05	9.16e-05	0.000188		9.69194e-05	6.5004e-05	0.000151632		-8.66276e-05
83	C<->F	1	0.00994408	0.0111459	0.0086	0.00803	0.00763	0.0139	0.00815	0.00961	0.0105	0.00944	0.00657561	0.0088214	0.00443	0.00216627	0.0038148	0.00963	0.00976	0.00804	0.00653		0.00824832	0.00936225	0.00633872		0.00302352
84	Q<->F	3	7.31e-05	4.17e-05	0.00011	0.000164	0.000123	4.12e-05	0.000288	3.2e-05	5.43e-05	5.6e-05	0.00010496	4.57893e-05	0.000246	0.000130471	0.000193595	0.000194	0.000106	0.000191	0.000265		0.00012948	9.45041e-05	0.000189438		-9.49339e-05
85	E<->F	3	3.36e-05	3.1e-05	5.28e-05	3.41e-05	5.34e-05	1.77e-05	0.000204	2.11e-05	2.01e-05	3.77e-05	5.51925e-05	4.41616e-05	0.000166	0.000161065	0.000174835	0.00013	2.1e-05	4.98e-05	0.000164		7.74502e-05	5.04045e-05	0.000123814		-7.34098e-05
86	G<->F	2	0.000704579	0.000754	0.000433935	0.000800544	0.000588094	0.000391	0.00106	0.000626	0.000566935	0.000708048	0.000692101	0.000702829	0.00064	0.000512	0.000575	0.000854512	0.000375	0.000599	0.000732		0.000648188	0.000669005	0.000612502		5.65037e-05
87	H<->F	2	0.00414892	0.00150409	0.00375023	0.00505	0.00246	0.00173	0.00575	0.00438	0.00274464	0.00434823	0.00468151	0.00150321	0.00439	0.00233296	0.00441268	0.00269372	0.00150402	0.00197	0.0037867		0.00332321	0.00350424	0.00301287		0.000491369
88	I<->F	1	0.00538363	0.00424782	0.00507	0.0056606	0.00545	0.00639	0.00454	0.0043084	0.00402284	0.0061814	0.00503824	0.00549709	0.00565	0.00531396	0.00456106	0.00569818	0.00528	0.00479	0.00584098		0.00520654	0.00514917	0.00530488		-0.000155714
89	L<->F	1	0.0140917	0.018016	0.0156479	0.0152	0.0173	0.0173	0.0141593	0.0149486	0.016003	0.0162	0.014951	0.018432	0.0176	0.0164603	0.0139595	0.0176	0.0198	0.0184	0.0136648		0.0163018	0.0160208	0.0167835		-0.000762718
90	K<->F	3	4.49e-05	3.77e-05	5.75e-05	1.63e-05	5.95e-05	6.36e-05	0.000120503	0.000113817	4.97e-05	6.91e-05	1.82473e-05	1.45681e-05	0.00016026	5.03e-05	0.00015	0.000165589	4.75e-05	1.63e-05	0.000260985		7.98089e-05	5.54529e-05	0.000121562		-6.61091e-05
91	M<->F	2	0.00824635	0.00747296	0.00906826	0.0106664	0.0101	0.00491114	0.00890235	0.00689448	0.00656	0.00958565	0.00958127	0.00849608	0.00883668	0.0105718	0.00647182	0.00743	0.00651503	0.00595498	0.00853764		0.00814752	0.00837375	0.00775971		0.000614034
92	A<->P	1	0.00558899	0.00649	0.00652238	0.00439742	0.00675427	0.00751747	0.00859681	0.00651888	0.00573734	0.00734067	0.00497533	0.00671771	0.00636337	0.00433238	0.00683	0.00635995	0.00568	0.00511463	0.00655		0.00623093	0.00642977	0.00589005		0.000539724
93	R<->P	1	0.0012605	0.000688025	0.0010684	0.00146	0.000953084	0.00123636	0.00128575	0.00134	0.00137707	0.00112	0.00132535	0.00153518	0.0013468	0.00125709	0.00172073	0.00208657	0.00132467	0.00145238	0.00183931		0.00135143	0.00122081	0.00157536		-0.000354555
94	N<->P	2	0.000594029	0.000480514	0.000714	0.000625022	0.000664124	0.000476418	0.000673	0.000613799	0.000377	0.00078313	0.00058991	0.000612938	0.00077764	0.00132965	0.000809836	0.000759603	0.000301306	0.000339703	0.00087034		0.000652209	0.000600324	0.000741154		-0.000140831
95	D<->P	2	0.00170858	0.00212834	0.00198095	0.00207113	0.00250164	0.00118171	0.00217517	0.00164832	0.00160065	0.00231	0.00221052	0.00196361	0.00171	0.00199831	0.00219612	0.00144	0.00166942	0.00159451	0.00206		0.00190258	0.00195672	0.00180976		0.000146954
96	C<->P	2	8.6e-06	0.000338	0.000154135	0.000116615	0.000472626	1.57e-05	0.000391111	6.14e-05	0.000147	6.68e-05	0.000222469	0.000140268	0.00054053	0.00125013	0.000339	0.000314269	0.000406967	0.000761308	0.000502379		0.000328911	0.000177894	0.000587797		-0.000409903
97	Q<->P	1	0.00177568	0.0028083	0.00154622	0.00200137	0.00184816	0.00237512	0.00266056	0.00172778	0.00181134	0.00163	0.00186391	0.00208344	0.00369796	0.00655939	0.00603523	0.00494516	0.00405597	0.0029223	0.00401		0.00296621	0.00201099	0.00460372		-0.00259273
98	E<->P	2	0.00143797	0.00231878	0.00196833	0.00205145	0.00224291	0.0016221	0.00194439	0.00147	0.00134	0.00219	0.00197726	0.0021842	0.00189524	0.00192053	0.00236435	0.00157316	0.00189686	0.00113841	0.00208103		0.00187458	0.00189562	0.00183851		5.7104e-05
99	G<->P	2	0.00111669	0.000727542	0.000911136	0.00157378	0.000856647	0.000489488	0.00144	0.00107966	0.00103	0.00105216	0.00138793	0.000670081	0.00079925	0.00140053	0.00103795	0.00164132	0.00100988	0.000984565	0.00118		0.00107309	0.00102793	0.0011505		-0.000122575
100	H<->P	1	0.00152101	0.001891	0.0013805	0.0014608	0.00162209	0.00177498	0.00274373	0.00191	0.0016962	0.00159	0.00132986	0.00188609	0.00337	0.00215104	0.00564794	0.00339812	0.00273159	0.00203447	0.00308		0.00227471	0.00173386	0.00320188		-0.00146803
101	I<->P	2	0.000171825	0.00013549	0.000207353	0.000145874	0.000270171	9.91e-05	8.95e-05	9.46e-05	8.82e-05	0.000224379	0.00013373	0.000184706	0.00039322	0.000310556	0.000486381	0.000323288	0.00014737	0.000106196	0.000485236		0.000215641	0.000153744	0.00032175		-0.000168006
102	L<->P	1	0.000929249	0.00115215	0.000853121	0.000667153	0.000776769	0.00122176	0.00100314	0.000992404	0.00120493	0.000699	0.000869073	0.000870482	0.00143645	0.00136266	0.00233471	0.00171941	0.00120002	0.00123632	0.00199217		0.00118531	0.000936602	0.00161168		-0.000675075
103	K<->P	2	0.00168877	0.0022497	0.00174649	0.00174753	0.00223175	0.00150837	0.00177891	0.00148525	0.00115	0.00194899	0.00210458	0.00179526	0.00182664	0.00204492	0.00217969	0.00155441	0.00150193	0.000873666	0.00195217		0.00175626	0.0017863	0.00170477		8.15247e-05
104	M<->P	2	0.00118092	0.000509873	0.000609195	0.000956934	0.000510211	0.000380148	0.00090357	0.000928577	0.000757693	0.000668	0.000821568	0.000568823	0.00063425	0.00106539	0.000556628	0.00103089	0.000768634	0.000885752	0.000719		0.000760845	0.000732959	0.00080865		-7.56908e-05
105	F<->P	2	0.000334443	0.000305616	0.00035861	0.000262725	0.00054534	0.000312681	0.000310748	0.000244	0.000296	0.000387	0.000333039	0.000363622	0.00060164	0.000964007	0.00062783	0.00052908	0.000365952	0.000327359	0.000629046		0.000426249	0.000337819	0.000577845		-0.000240026
106	A<->S	1	0.0174522	0.0260477	0.0231155	0.0182987	0.0297149	0.0207595	0.0343	0.0171238	0.021	0.0234	0.0199656	0.0319071	0.0282057	0.0284473	0.0232221	0.0180187	0.0263555	0.0181004	0.0225		0.0235755	0.0235904	0.02355		4.04409e-05
107	R<->S	1	0.00333105	0.00339731	0.00363105	0.00324166	0.00314525	0.00446127	0.00345452	0.00385	0.0039	0.00352	0.00319577	0.00379199	0.00361	0.00449285	0.0037685	0.00341348	0.00392489	0.00408041	0.00432		0.00371211	0.00357666	0.00394431		-0.000367649
108	N<->S	1	0.0256815	0.0216279	0.0201745	0.0206263	0.0172886	0.0226	0.0172	0.0235	0.0235	0.0202	0.0216578	0.0178931	0.0170978	0.0219349	0.0167216	0.0172121	0.017761	0.0188642	0.0189		0.0200232	0.0209958	0.018356		0.00263985
109	D<->S	2	0.00473556	0.00539744	0.00586224	0.00562859	0.00578989	0.00386237	0.00513	0.00417	0.00485	0.00584389	0.00589934	0.0052253	0.00549	0.00680626	0.00492266	0.0041277	0.00520126	0.00575	0.00583		0.00529066	0.00519955	0.00544684		-0.000247288
110	C<->S	1	0.0150275	0.018866	0.0171283	0.0146037	0.0177	0.0235	0.0213	0.0174	0.0180678	0.0156852	0.0143066	0.0194364	0.0148	0.00837499	0.0130943	0.0130844	0.0184317	0.0108395	0.0134		0.0160551	0.0177518	0.0131464		0.00460537
111	Q<->S	2	0.00465514	0.00454243	0.00501982	0.00583435	0.00547561	0.00308	0.00502	0.00389	0.00378772	0.00494	0.00607964	0.00558772	0.0059	0.0102452	0.00480301	0.00452253	0.00531	0.0044	0.00589546		0.00520993	0.00482604	0.00586803		-0.001042
112	E<->S	2	0.00147138	0.00197423	0.00228732	0.00201	0.00265	0.00163	0.00193	0.00125821	0.00174	0.00247	0.00190915	0.00252774	0.00277	0.00436325	0.00276113	0.0019031	0.00247682	0.00263	0.00290707		0.00229839	0.00198817	0.0028302		-0.000842026
113	G<->S	1	0.0111528	0.0109901	0.00946	0.00869173	0.00839	0.0127	0.0100706	0.0115005	0.0102	0.00952073	0.0102764	0.00884704	0.00923	0.0107951	0.00785186	0.00921214	0.00877	0.01	0.009		0.00982416	0.01015	0.00926559		0.00088441
114	H<->S	2	0.00423789	0.004019	0.00465025	0.00462	0.00388	0.00385	0.00463625	0.00483	0.00394799	0.00414689	0.00421938	0.00495179	0.00479696	0.00663546	0.00400354	0.00377	0.00445	0.00331	0.00477		0.0044066	0.00433245	0.00453371		-0.000201255
115	I<->S	1	0.000171596	0.000109	6.36e-05	6.64e-05	5.81e-05	0.000192926	8.83e-05	8.9e-05	0.000102672	0.000131343	5.6429e-05	5.14465e-05	0.00026722	4.13e-05	0.000369	0.000285212	7.8e-05	7.7e-05	0.000465954		0.0001455	9.8401e-05	0.000226241		-0.00012784
116	L<->S	1	0.000459562	0.000393549	0.00023783	0.000262831	0.000467	0.000608056	0.000650047	0.000349541	0.000303169	0.000381371	0.00021746	0.000363032	0.00116199	0.000392793	0.00173055	0.00122987	0.000433147	0.00024671	0.00141811		0.000595085	0.000391121	0.000944739		-0.000553618
117	K<->S	2	0.00315839	0.00256096	0.00354618	0.00325218	0.0031186	0.00258029	0.00252387	0.00212969	0.00296911	0.00353877	0.00335672	0.00311583	0.00312177	0.00447624	0.00344645	0.00255199	0.00345	0.00297865	0.00356272		0.00312834	0.00298755	0.00336969		-0.000382138
118	M<->S	2	0.00299951	0.00128085	0.00179388	0.00184	0.00207691	0.00174244	0.00241799	0.00264923	0.00170949	0.00186969	0.00181715	0.00195596	0.00206592	0.00252047	0.00141785	0.00167922	0.00129988	0.00181739	0.00204685		0.0019474	0.00201276	0.00183537		0.000177388
119	F<->S	1	0.00115997	0.00144438	0.00087	0.00085234	0.000963802	0.00137467	0.00111769	0.00110563	0.000892715	0.000680944	0.000832467	0.00114208	0.00237512	0.000970082	0.00238679	0.00201122	0.00178237	0.00103752	0.00261516		0.00134815	0.00103639	0.00188261		-0.000846218
120	P<->S	1	0.00505955	0.00740924	0.0054927	0.00431197	0.00662808	0.00676306	0.00620877	0.00483074	0.00651606	0.0050877	0.00483033	0.00785374	0.00741734	0.0056965	0.0109934	0.00675	0.00727989	0.00892605	0.00750846		0.00660861	0.005916	0.00779595		-0.00187995
121	A<->T	1	0.00840176	0.0102	0.00735607	0.00634858	0.00879958	0.0113328	0.00932299	0.00846533	0.00988164	0.00757446	0.00675605	0.0110073	0.0115888	0.0128987	0.0148	0.0114839	0.00987576	0.0117811	0.0110072		0.00994116	0.00878721	0.0119194		-0.00313215
122	R<->T	1	0.00236854	0.00209662	0.00276026	0.00346995	0.0027861	0.00208092	0.00224944	0.00225637	0.00253222	0.00284357	0.00317689	0.00290348	0.00256077	0.00257697	0.00250995	0.00249631	0.00281081	0.00424183	0.00286986		0.00271531	0.00262703	0.00286664		-0.000239611
123	N<->T	1	0.0125411	0.00883838	0.00910545	0.00968453	0.00811915	0.00950314	0.00899471	0.0096874	0.0110057	0.00932	0.0102104	0.00740842	0.0085069	0.00810788	0.00828333	0.00983101	0.00910816	0.00977809	0.00953136		0.00934554	0.00953487	0.00902096		0.000513908
124	D<->T	2	0.00178874	0.00199651	0.00169995	0.00207067	0.00200906	0.00137389	0.00122463	0.00136917	0.0018	0.00157442	0.00213113	0.00147264	0.00171802	0.0018662	0.00196003	0.00161816	0.00145256	0.00168251	0.00215087		0.00173469	0.00170923	0.00177834		-6.91034e-05
125	C<->T	2	0.00841064	0.00753619	0.0116667	0.00767688	0.00970984	0.00562613	0.0107389	0.00707627	0.00822418	0.0111117	0.00991599	0.00746322	0.007711	0.00537114	0.00436262	0.00543026	0.00753059	0.00554751	0.00528		0.00770472	0.00876305	0.00589045		0.00287261
126	Q<->T	2	0.00492761	0.00427325	0.00449786	0.00554929	0.00484767	0.00321275	0.0049162	0.00388	0.00415812	0.00508	0.00572811	0.00411944	0.00442836	0.00550183	0.0044431	0.00381414	0.00410967	0.00477782	0.00511859		0.00459915	0.00459919	0.00459907		1.17265e-07
127	E<->T	2	0.00255572	0.00281498	0.0030469	0.00290797	0.00332821	0.00257326	0.00312	0.00193703	0.00246	0.00326	0.00285476	0.00262843	0.00247937	0.00210917	0.00289546	0.0020984	0.00247641	0.00317706	0.00288991		0.00271648	0.0027906	0.0025894		0.000201207
128	G<->T	2	0.000778128	0.000371537	0.000514442	0.000781993	0.000222374	0.000557514	0.000661561	0.000764498	0.00078	0.000436	0.000688248	0.000311042	0.000605	0.000403767	0.000562873	0.000809704	0.000248064	0.000738398	0.000759		0.000578639	0.000572278	0.000589544		-1.72656e-05
129	H<->T	2	0.00245051	0.00201942	0.00259076	0.00287096	0.00253302	0.00188	0.00169499	0.0022	0.00228	0.00272643	0.00289804	0.00299666	0.00210447	0.00240334	0.00209166	0.00226174	0.00198041	0.00221634	0.00282		0.00236941	0.0024284	0.00226828		0.000160118
130	I<->T	1	0.00417187	0.00307296	0.00316893	0.00189692	0.00312289	0.00528197	0.00432	0.00347	0.00438947	0.00337	0.00268386	0.00327312	0.00604429	0.00249	0.00660074	0.00510369	0.00394479	0.0025	0.00617		0.00395134	0.0035185	0.00469336		-0.00117486
131	L<->T	2	0.00110421	0.000900183	0.00113129	0.00120931	0.00144	0.000908974	0.00147	0.00121	0.00114	0.00136	0.00122659	0.00106354	0.00165	0.0022751	0.00136217	0.00163004	0.00117699	0.000987518	0.00172027		0.00131401	0.00118034	0.00154316		-0.000362815
132	K<->T	1	0.00584003	0.00510574	0.0052003	0.00564197	0.00500923	0.00578	0.00421	0.00439261	0.00545	0.00579	0.00541194	0.00524298	0.00424	0.00356062	0.00541819	0.00490038	0.00537	0.00876832	0.00551		0.00530749	0.00525623	0.00539536		-0.000139125
133	M<->T	1	0.0104053	0.00913615	0.00873023	0.00852	0.00841611	0.0105	0.0084053	0.00976	0.00927	0.00804	0.00898899	0.00892501	0.0109	0.00936	0.00901783	0.00872189	0.00917798	0.0104	0.0104		0.00931973	0.00909142	0.0097111		-0.000619676
134	F<->T	2	0.000542219	0.000522538	0.000822	0.000594049	0.000574	0.000478	0.000753	0.000615	0.000464	0.000661	0.000594794	0.000810293	0.00103111	0.00110197	0.000690432	0.000762296	0.000553168	0.000567	0.000972		0.00068994	0.000619241	0.000811139		-0.000191898
135	P<->T	1	0.00256981	0.00242719	0.00245952	0.00213952	0.0023	0.00265576	0.0037	0.0026	0.00232	0.00245558	0.00208812	0.00230312	0.00259	0.00348153	0.00392082	0.00319	0.00249	0.00261	0.00329		0.00271531	0.00250155	0.00308176		-0.00058021
136	S<->T	1	0.036129	0.0339	0.0338275	0.0284	0.0348	0.0325	0.0382	0.0341	0.0366276	0.0336999	0.0345804	0.0343367	0.0321	0.0356271	0.0272	0.0241402	0.0308	0.0263412	0.0301		0.0324952	0.0342584	0.0294727		0.00478577
137	A<->W	2	0.000736179	0.00120414	0.000863	0.000949	0.00112027	0.000505	0.000975	0.0012	0.00102243	0.000732	0.00107423	0.00105923	0.000711	0.000761794	0.00123267	0.00070945	0.000725	0.00115	0.00104043		0.000935306	0.000953373	0.000904334		4.90392e-05
138	R<->W	1	0.00172384	0.00405797	0.00248	0.00188	0.00299	0.00262	0.0031	0.00223241	0.00303	0.00208	0.00215742	0.00381613	0.00312	0.00285757	0.00529799	0.00277	0.00528615	0.00513	0.00434883		0.00320939	0.00268065	0.00411579		-0.00143514
139	N<->W	3	0.000211066	7.28e-05	9.62e-05	0.000205161	0.000202	4.08e-05	0.000286411	0.000129312	2.72e-05	0.000113	0.000411996	2.76231e-05	0.000218	0.000683674	0.000495	0.000109	0.000381	4.53e-05	0.00032		0.000214502	0.000151964	0.000321711		-0.000169746
140	D<->W	3	5.56e-05	6.24e-05	0.000105617	7.25e-05	0.000173499	7.15e-05	0.000278235	1.64e-05	6.02e-05	5.5e-05	8.26249e-05	1.04082e-05	0.00024673	0.000372222	0.000515058	0.0002036	4.66e-05	9.24e-05	0.000305		0.000148715	8.69987e-05	0.000254516		-0.000167517
141	C<->W	1	0.00542717	0.00739345	0.00396541	0.00122909	0.00398701	0.00656585	0.00171448	0.00759	0.00738086	0.00343395	0.00141771	0.00402254	0.00262056	0.00171253	0.00944646	0.00736198	0.00829522	0.0047729	0.0055888		0.00494347	0.00451063	0.00568549		-0.00117486
142	Q<->W	2	0.000615915	0.000711961	0.000656637	0.000677466	0.0005693	0.000446353	0.00062	0.000479232	0.000765193	0.000393093	0.000783747	0.000541706	0.00106663	0.00283773	0.000856558	0.00080951	0.00182551	0.000969411	0.00139764		0.000895978	0.00060505	0.00139471		-0.000789662
143	E<->W	2	7.23e-05	0.000238923	0.00017323	0.000167038	0.000177143	0.000146942	0.00034755	0.000117833	0.000109114	7.54e-05	0.00018375	0.000112864	0.000393	0.00092033	0.000761639	0.000324695	0.000291771	0.000165682	0.000648392		0.000285663	0.000160174	0.000500787		-0.000340613
144	G<->W	1	0.00127557	0.00206334	0.00125583	0.00138137	0.00169096	0.0025	0.00126229	0.00170478	0.00177384	0.00107988	0.00114715	0.00190307	0.00219483	0.00194425	0.00316721	0.0017774	0.00211837	0.00118878	0.00239857		0.00178039	0.00158651	0.00211277		-0.000526265
145	H<->W	3	0.00239132	0.00217885	0.00202472	0.00517163	0.00203268	0.000769276	0.00260288	0.00377184	0.00303119	0.00228	0.00529654	0.000801332	0.00378683	0.00559118	0.00152742	0.00226101	0.00285312	0.00292	0.00304428		0.00285979	0.00269602	0.00314055		-0.000444527
146	I<->W	3	0.000630944	0.000760692	0.00100321	0.000918558	0.00108	0.000454137	0.000202955	0.000345343	0.000234	0.000377135	0.000677167	0.000828505	0.00039251	0.000450126	0.000479334	0.000518902	0.000263811	0.000236326	0.000648349		0.000552737	0.000626053	0.000427051		0.000199002
147	L<->W	1	0.00504214	0.00567887	0.00572098	0.00348492	0.00548257	0.00499287	0.0062071	0.00720859	0.0059948	0.00511274	0.00396299	0.00650879	0.00309159	0.00269962	0.00358081	0.00335947	0.0032	0.00342277	0.00375		0.00465798	0.00544978	0.00330061		0.00214917
148	K<->W	2	0.000183663	0.000537588	0.000115254	7.97e-05	0.000296153	0.000121194	0.000137689	1.5e-05	0.000120668	0.000235	9.06152e-05	7.06679e-05	0.00021207	0.000294718	0.000439505	0.000262968	0.000191301	0.000417498	0.000423364		0.000223401	0.000166933	0.000320203		-0.000153271
149	M<->W	2	0.00339671	0.00505079	0.00407671	0.00302264	0.00423061	0.00341178	0.00858457	0.00268125	0.00239	0.00409101	0.00379869	0.00568672	0.00386973	0.00515206	0.0036787	0.00333786	0.00316184	0.00306681	0.00425219		0.00404951	0.00420179	0.00378846		0.000413336
150	F<->W	2	0.0145818	0.0186475	0.0166098	0.0198666	0.0214432	0.0110519	0.0148486	0.0159283	0.0133024	0.0172425	0.0188541	0.0162994	0.0196493	0.014358	0.0100633	0.0199596	0.0142754	0.0112719	0.0125		0.0158291	0.0165563	0.0145825		0.00197386
151	P<->W	2	0.000526317	0.000454269	0.000517605	0.000574317	0.000194097	0.000306084	0.000818613	0.000491	0.00045767	0.000592	0.000773793	0.000628533	0.0004413	0.00107033	0.000320957	0.000573431	0.000628683	0.00088909	0.000625308		0.00057281	0.000527858	0.000649871		-0.000122012
152	S<->W	1	0.000988624	0.00183868	0.00114076	0.000966749	0.00109021	0.000839083	0.00117	0.00099229	0.00101	0.000873	0.0015702	0.00119238	0.00133342	0.0015726	0.00116803	0.00101258	0.00164402	0.00119166	0.00170067		0.00122605	0.00113933	0.00137471		-0.000235381
153	T<->W	2	0.000673967	0.000426138	0.000566449	0.000689209	0.000510706	0.000446996	0.00118666	0.000643821	0.000731	0.000613947	0.000558585	0.000996766	0.000674	0.000690339	0.000988508	0.000656439	0.000813022	0.000626362	0.000932		0.000706574	0.000670353	0.000768667		-9.83138e-05
154	A<->Y	2	0.000350174	0.000823651	0.000786878	0.000475466	0.00108865	0.000422	0.000932116	0.000262	0.000397437	0.000706	0.000472172	0.00103734	0.00128025	0.00189837	0.000993826	0.000701588	0.000729829	0.000791694	0.00117		0.000806286	0.000646157	0.00108079		-0.000434637
155	R<->Y	2	0.000380935	0.00102876	0.00123113	0.000490257	0.00192686	0.00104168	0.00127	0.000264	0.000441	0.00117037	0.000618587	0.00153002	0.00165475	0.00156	0.00137834	0.0012053	0.000865182	0.00123	0.00172238		0.00110577	0.000949466	0.00137371		-0.000424241
156	N<->Y	1	0.0015304	0.00186251	0.00140004	0.00272973	0.00226	0.00238359	0.00136	0.00113458	0.0015519	0.00125551	0.00200996	0.00190391	0.00281	0.00263286	0.00324444	0.00230786	0.00268174	0.0017993	0.00374		0.00213675	0.00178184	0.00274517		-0.000963329
157	D<->Y	1	0.000427665	0.000470559	0.00024671	0.000197645	0.00049218	0.000667	0.000336418	0.000198	0.000375598	0.000228651	0.000164253	0.000405518	0.00067	0.000677474	0.000834571	0.000797489	0.000568	0.000257508	0.00102061		0.000475571	0.00035085	0.000689379		-0.00033853
158	C<->Y	1	0.00676045	0.0119944	0.00649372	0.00398	0.0056838	0.0116	0.00314	0.00731819	0.00803613	0.00597	0.00548808	0.00726409	0.00733726	0.00483	0.0091603	0.00897853	0.0132082	0.00864	0.00755875		0.00754957	0.0069774	0.00853044		-0.00155303
159	Q<->Y	2	0.000315705	0.000851398	0.000428	0.000671376	0.000836	0.000198331	0.000830047	0.000159882	0.000367	0.000385	0.00052653	0.000802598	0.00146	0.0021976	0.000967541	0.00112114	0.000966877	0.00056	0.00150357		0.000797294	0.000530989	0.00125382		-0.000722828
160	E<->Y	2	0.000102674	0.000341322	0.000214917	0.000139822	0.000403	8.54e-05	0.000229564	0.000123798	0.00015	0.000149517	0.000111249	0.000237354	0.00052237	0.000775569	0.000519963	0.000365	0.000233	0.000128549	0.00076		0.000294372	0.000190718	0.000472064		-0.000281346
161	G<->Y	2	0.000160669	0.000125	0.000144688	0.00018	0.000258192	0.000120337	0.000401621	0.000143	0.000105473	0.00023651	0.000114471	8.41505e-05	0.00031838	0.000405877	0.000401	0.000703651	8.56e-05	7.11e-05	0.00042		0.000235775	0.000172843	0.000343658		-0.000170816
162	H<->Y	1	0.0329187	0.0296589	0.0328	0.031598	0.024414	0.0291891	0.0295	0.035	0.0348676	0.0321	0.0306272	0.0338707	0.0379885	0.0354714	0.0426464	0.0345983	0.0364877	0.0463078	0.029478		0.0336591	0.0313787	0.0375683		-0.00618958
163	I<->Y	2	0.000431042	0.000348407	0.000586934	0.000551992	0.000810396	0.00043455	0.000431	0.000227532	0.000439	0.00074394	0.000870211	0.000553362	0.000814	0.00120602	0.000887699	0.000853	0.000462467	0.00052485	0.00131329		0.000657352	0.000535697	0.000865903		-0.000330206
164	L<->Y	2	0.000525925	0.000759	0.00104686	0.00136842	0.0014978	0.000485	0.00162259	0.000564761	0.000637296	0.000983	0.00104191	0.00103248	0.00126	0.00268736	0.00134	0.00123152	0.000781282	0.00103816	0.00164		0.00113386	0.000963754	0.00142547		-0.00046172
165	K<->Y	2	8.29e-05	0.000217152	0.000245112	0.000229753	0.000419965	8.95e-05	0.000113967	9.38e-05	0.00012	0.000427	4.68514e-05	0.000557561	0.00049389	0.000652	0.000488774	0.000266966	0.000244116	0.000424	0.000758131		0.000314286	0.000220297	0.000475411		-0.000255114
166	M<->Y	3	0.0013921	0.0014829	0.00148429	0.00210617	0.00172	0.000768006	0.00155	0.000713546	0.000791	0.00117	0.00136581	0.00119842	0.00183363	0.00328827	0.00252943	0.00169957	0.00101418	0.00151332	0.0024		0.00158003	0.00131185	0.00203977		-0.000727917
167	F<->Y	1	0.077422	0.0603288	0.0840843	0.0915461	0.0601688	0.073138	0.0720709	0.083	0.0726	0.0774	0.0711998	0.0574042	0.0488	0.0513818	0.0502059	0.0579407	0.0654	0.0526597	0.0417		0.0657079	0.0733636	0.052584		0.0207796
168	P<->Y	2	8.54e-05	0.000279092	0.000245954	0.000167	0.000364488	0.000148	0.00046	0.00013	0.000165	0.000314	0.000225531	0.000329528	0.00068102	0.000640529	0.000445636	0.000655417	0.000449507	0.000279347	0.000636		0.000352708	0.000242833	0.000541065		-0.000298232
169	S<->Y	1	0.00111355	0.00143347	0.000987	0.00104058	0.00146555	0.00131255	0.00168	0.000862	0.000992	0.00100431	0.000660711	0.00134002	0.00215	0.00149801	0.00239868	0.00147865	0.00218041	0.00173	0.00236		0.00145724	0.00115765	0.00197082		-0.000813176
170	T<->Y	2	0.000533641	0.00080339	0.000748352	0.000498428	0.00108	0.000482	0.00086	0.000485	0.000474226	0.000817	0.000904015	0.00104584	0.00117	0.002071	0.000931105	0.00101	0.000701555	0.000628815	0.00135		0.000873388	0.000727657	0.00112321		-0.000395554
171	W<->Y	2	0.021374	0.023	0.0253948	0.0242636	0.0169855	0.0296	0.018	0.0251	0.0206	0.0187	0.0299106	0.0129059	0.0201	0.0167303	0.0142	0.0246255	0.0204	0.0157	0.0150566		0.0206656	0.0221529	0.0181161		0.00403681
172	A<->V	1	0.008249	0.0108765	0.00895875	0.00724	0.012	0.0108	0.0106	0.00814446	0.00936	0.00941	0.00803475	0.0141439	0.0164	0.0152773	0.0156867	0.0120456	0.0124733	0.00991	0.0136		0.0112216	0.00981811	0.0136275		-0.00380944
173	R<->V	2	0.000628578	0.000489722	0.000591	0.000821199	0.00074	0.000451	0.000795447	0.00049	0.000515	0.000684717	0.000675697	0.000626443	0.000869	0.000794688	0.000856308	0.000827614	0.000463	0.000525	0.000992		0.000675601	0.000625734	0.000761087		-0.000135354
174	N<->V	2	0.000424193	0.000166528	0.000246665	0.000495	0.000348	0.000183	0.000604	0.000244	0.000200414	0.000339	0.000478617	0.000209999	0.00034838	0.000296542	0.000335	0.000653	0.000104	0.000205	0.000551		0.000338544	0.000328285	0.000356132		-2.7847e-05
175	D<->V	1	6.74e-05	5.92e-05	7.64e-05	8.15e-05	8.73e-05	0.000132126	3.78e-05	6.25e-05	4.16e-05	4.67e-05	4.75506e-05	3.35139e-05	0.000143	7.91e-05	0.000332	0.000399603	5.3e-05	5.48e-05	0.000392967		0.000117266	6.44659e-05	0.000207781		-0.000143316
176	C<->V	2	0.0115176	0.0126082	0.014149	0.0149	0.0216	0.00614	0.013	0.00901937	0.011913	0.0146061	0.0161771	0.012673	0.0122124	0.00445662	0.00591495	0.0108978	0.00776118	0.00848098	0.00931		0.0114388	0.0131919	0.00843342		0.00475853
177	Q<->V	2	0.000920026	0.000518438	0.000781	0.000881998	0.000889736	0.000658824	0.000827541	0.000809	0.000639428	0.000786362	0.000872823	0.000673536	0.00105	0.000782033	0.000772091	0.00104243	0.000718	0.000395	0.00123659		0.000802887	0.000771559	0.000856592		-8.50331e-05
178	E<->V	1	0.000784409	0.000834677	0.000971198	0.000752	0.00112	0.00112	0.00091	0.000746995	0.000590721	0.00101	0.000625707	0.000824702	0.00115953	0.00119662	0.0013842	0.00151	0.000765105	0.000359296	0.00167679		0.000965366	0.000857534	0.00115022		-0.000292686
179	G<->V	1	0.000287269	0.000174	0.000225	0.000222474	0.00020065	0.000665764	0.000233	0.000200023	0.000207	0.000227542	0.00013766	0.000254253	0.000298	4.57e-05	0.000749	0.000752833	9.41e-05	0.000414	0.000745587		0.000322834	0.000252886	0.000442746		-0.000189859
180	H<->V	2	0.000624893	0.000318444	0.000700827	0.0010489	0.000576	0.000343	0.000890105	0.000466968	0.00034285	0.000814	0.000755499	0.000373914	0.00047956	0.000445671	0.000439991	0.000761	0.000365684	0.000588722	0.000753		0.000583633	0.000604616	0.000547661		5.69553e-05
181	I<->V	1	0.0718678	0.0584	0.0708037	0.0663805	0.0650037	0.0726494	0.072372	0.0695	0.0726	0.073428	0.0687302	0.0639371	0.0597416	0.0596816	0.0505	0.0679831	0.0587	0.0732	0.0510171		0.065605	0.068806	0.0601176		0.00868839
182	L<->V	1	0.0109592	0.00652583	0.00829899	0.0107	0.00678	0.00865836	0.00796	0.0119661	0.0106973	0.00858976	0.00953236	0.00780382	0.00751197	0.00650454	0.00661529	0.00972888	0.00620177	0.0104634	0.00839		0.00862567	0.00903932	0.00791655		0.00112276
183	K<->V	2	0.000518517	0.00051808	0.000946	0.00061847	0.00101986	0.000606226	0.00075684	0.000654	0.000456243	0.000850562	0.000722331	0.000832448	0.000815	0.000955419	0.00085526	0.00088832	0.000529	0.00063889	0.00113146		0.000753312	0.000708298	0.000830479		-0.000122181
184	M<->V	1	0.00894109	0.00605203	0.00699997	0.00714	0.00664029	0.0104	0.00711	0.00899834	0.00819266	0.00750165	0.00715457	0.00654108	0.00755226	0.00425932	0.00789665	0.00889	0.00560608	0.0061357	0.00947046		0.00744643	0.00763931	0.00711578		0.000523526
185	F<->V	1	0.00267424	0.00266	0.00239	0.00299543	0.00275282	0.00319446	0.00206786	0.00183321	0.00265934	0.00317344	0.00279304	0.00316705	0.00299	0.00262298	0.00223	0.00357112	0.00250381	0.00417	0.0033918		0.00283372	0.00269674	0.00306853		-0.000371789
186	P<->V	2	0.000962823	0.000998289	0.00108698	0.00102224	0.00149	0.000968	0.00167785	0.00089971	0.000881079	0.0013125	0.00119327	0.00102442	0.00157329	0.00197784	0.00152752	0.00133	0.00105628	0.00102898	0.00163326		0.00124444	0.00112643	0.00144674		-0.000320308
187	S<->V	2	0.000173714	8.71e-05	0.000172236	0.000125986	0.000218391	0.000142353	0.00042995	0.000119203	0.000131126	0.00019674	9.83904e-05	0.000128819	0.00055579	0.000138306	0.000506252	0.000323444	9.23e-05	3.04e-05	0.00058666		0.000224061	0.000168667	0.000319022		-0.000150354
188	T<->V	2	0.0104864	0.0103174	0.0110547	0.008566	0.0120018	0.00912437	0.0116368	0.00897712	0.00887925	0.0110344	0.0104914	0.0116332	0.0140186	0.014223	0.00988935	0.00956383	0.0103856	0.00718825	0.0108786		0.0105447	0.0103502	0.0108782		-0.000527949
189	W<->V	2	0.00107275	0.000616915	0.000785424	0.0014785	0.00126198	0.000946778	0.000365158	0.000840247	0.00109725	0.000718114	0.0011125	0.000681307	0.00080989	0.000585515	0.000777692	0.000852213	0.000701307	0.00075474	0.00109845		0.000871406	0.000914743	0.000797116		0.000117627
190	Y<->V	2	0.000659539	0.000556335	0.000859508	0.00110683	0.00148596	0.000428581	0.000515658	0.000637727	0.000599813	0.00091957	0.000622152	0.00112372	0.00099375	0.00183841	0.000790886	0.00095751	0.000486856	0.000904661	0.00136758		0.000887107	0.000792949	0.00104852		-0.000255572
