# Supplementary material for: The Structure of Evolutionary Model Space for Proteins Across the Tree of Life
Source: Preprints.org preprint supplement (doi:10.20944/preprints202212.0403.v1), 2022-12-21
Supplement: Supplementary file 2 [file Scolaro_Braun_Supplementary_File_S1.xlsx]

## Sheet: Summary
Taxon	Median %GC	Mean %GC	Min %GC	Max %GC	Domain	Taxa
Archaea_DPANN	34.05	34.6938	24.6	47.4	Archaea	13		min # taxa =	11
Archaea_Halobacteriaceae	63.7	62.8396	47.9485	67.7	Archaea	27		median # taxa =	20
Archaea_Methonmicrobia	47.4	48.3729	36.3956	61.65	Archaea	17		max # taxa =	37
Archaea_Thaumarchaeota	34.2	34.4423	33.35	35.7	Archaea	11
Archaea_Theromoprotei	49	48.402	30	59.9	Archaea	20
Alteromonadaceae	45.9	47.6884	38	66.1	Bacteria	24
Bacillaceae	42.15	42.6272	35.2	59.1	Bacteria	24
Chromatiales	62.15	60.4006	50.3	69.4	Bacteria	17
Comamonadaceae	65.3813	64.5286	57.5	69.8	Bacteria	18
Cytophagales	40.6	42.8991	30.7	54.6	Bacteria	29
Enterobacteriaceae	52.1753	51.1272	38.133	59.696	Bacteria	37
Lactobacilliaes	37.7	38.0383	31.1	47	Bacteria	29
Micrococcineae	69.65	68.2896	55.6	74.7	Bacteria	36
Oceanospirillales	54.4	52.6632	43.1	64.5	Bacteria	21
Rhodospirllales	65.0329	63.974	51.2	73.4	Bacteria	30
Selenomonadales	48.9	46.6063	35.65	58.15	Bacteria	16
Xanthomonadaceae	66.025	63.2222	40.5	71.1	Bacteria	18
Euk_Coelomata	40.7158	39.4555	29.6956	46	Euk	18
Euk_Pezizomycotina	48.9	48.934	42.2514	55.4	Euk	19

## Sheet: Ribo taxa
Short Name	Full name
Alteromonadaceae	Bacteria_Proteobacteria_Gammaproteobacteria_Alteromonadales_Alteromonadaceae
Archaea_DPANN	Archaea_DPANN
Archaea_Halobacteriaceae	Archaea_Euryarchaeota_Halobacteria_Halobacteriales_Halobacteriaceae_cc
Archaea_Methanomicrobia	Archaea_Euryarchaeota_Methanomicrobia_cc
Archaea_Thaumarchaeota	Archaea_Thaumarchaeota_unclassified_Thaumarchaeota_Marine_Group
Archaea_Thermoprotei	Archaea_Crenarchaeota_Thermoprotei
Bacillaceae	Bacteria_Firmicutes_Bacilli_Bacillales_Bacillaceae
Bacteroidales	Bacteria_Bacteroidetes_Chlorobi_group_Bacteroidetes_Bacteroidia_Bacteroidales
Chloroflexi_RBG	Bacteria_Chloroflexi_RBG
Chromatiales	Bacteria_Proteobacteria_Gammaproteobacteria_Chromatiales
Clostridiales	Bacteria_Firmicutes_Clostridia_Clostridiales
Comamonadaceae	Bacteria_Proteobacteria_Betaproteobacteria_Burkholderiales_Comamonadaceae
CPR_Falkowbacteria	Bacteria_CPR_Parcubacteria_OD1_Falkowbacteria
CPR_Gottesmanbacteria	Bacteria_CPR_Microgenomates_OP11_Gottesmanbacteria
CPR_Kaiserbacteria	Bacteria_CPR_Parcubacteria_OD1_Kaiserbacteria
CPR_Levybacteria	Bacteria_CPR_Microgenomates_OP11_Levybacteria
CPR_Magasanikbacteria	Bacteria_CPR_Parcubacteria_OD1_Magasanikbacteria
CPR_Moranbacteria	Bacteria_CPR_Parcubacteria_OD1_Moranbacteria
CPR_Nomurabacteria	Bacteria_CPR_Parcubacteria_OD1_Nomurabacteria
CPR_Roizmannbacteria	Bacteria_CPR_Microgenomates_OP11_Roizmannbacteria
CPR_Uhrbacteria	Bacteria_CPR_Parcubacteria_OD1_Uhrbacteria
CPR_Woesebacteria	Bacteria_CPR_Microgenomates_OP11_Woesebacteria
CPR_WWE3	Bacteria_CPR_WWE3
CPR_Yanofskybacteria	Bacteria_CPR_Parcubacteria_OD1_Yanofskybacteria
Cyanobacteria	Bacteria_Cyanobacteria
Cytophagales	Bacteria_Bacteroidetes_Chlorobi_group_Bacteroidetes_Cytophagia_Cytophagales
Deltaproteobacteria	Bacteria_Proteobacteria_deltaepsilon_subdivisions_Deltaproteobacteria
Elusimicrobia	Bacteria_Elusimicrobia
Enterobacteriaceae	Bacteria_Proteobacteria_Gammaproteobacteria_Enterobacteriales_Enterobacteriaceae
Euk_Coelomata	Eukaryota_Opisthokonta_Metazoa_Eumetazoa_Bilateria_Coelomata2
Euk_Pezizomycotina	Eukaryota_Opisthokonta_Fungi_Dikarya_Ascomycota_saccharomyceta_Pezizomycotina2
Flavobacteriaceae	Bacteria_Bacteroidetes_Chlorobi_group_Bacteroidetes_Flavobacteriia_Flavobacteriales_Flavobacteriaceae
Lactobacillales	Bacteria_Firmicutes_Bacilli_Lactobacillales
Micrococcineae	Bacteria_Actinobacteria_Actinobacteria_Actinobacteridae_Actinomycetales_Micrococcineae
Nitrospirae	Bacteria_Nitrospirae
Oceanospirillales	Bacteria_Proteobacteria_Gammaproteobacteria_Oceanospirillales
Rhizobiales	Bacteria_Proteobacteria_Alphaproteobacteria_Rhizobiales
Rhodobacteraceae	Bacteria_Proteobacteria_Alphaproteobacteria_Rhodobacterales_Rhodobacteraceae
Rhodospirillales	Bacteria_Proteobacteria_Alphaproteobacteria_Rhodospirillales
Saccharibacteria	Bacteria_CPR_Saccharibacteria
Selenomonadales	Bacteria_Firmicutes_Negativicutes_Selenomonadales
Verrucomicrobia	Bacteria_Chlamydiae_Verrucomicrobia2
Xanthomonadaceae	Bacteria_Proteobacteria_Gammaproteobacteria_Xanthomonadales_Xanthomonadaceae

## Sheet: Lactobacilliaes
Full taxon name	Proteome file	Genus_species	GC-contnet
Lactobacillaceae_Lactobacillus_catenaformis_OT_569	GCF_000340375.1_Lact_cate_OT_569_V1_protein.faa	Lactobacillus_catenaformis	32.8
Lactobacillaceae_Sharpea_azabuensis_DSM_18934	GCF_000702165.1_ASM70216v1_protein.faa	Sharpea_azabuensis	37.1
Streptococcaceae_Streptococcus_pleomorphus_DSM_20574	GCF_000420345.1_ASM42034v1_protein.faa	Streptococcus_pleomorphus	39
Lactobacillaceae_Lactobacillus_acidophilus_NCFM	GCF_000011985.1_ASM1198v1_protein.faa	Lactobacillus_acidophilus	34.6
Leuconostocaceae_Oenococcus_oeni_PSU_1	GCF_000014385.1_ASM1438v1_protein.faa	Oenococcus_oeni	37.9
Leuconostocaceae_Fructobacillus_fructosus_KCTC_3544_contig00014	GCF_001438695.1_ASM143869v1_protein.faa	Fructobacillus_fructosus	44.6
Leuconostocaceae_Leuconostoc_kimchii_IMSNU11154	GCF_000092505.1_ASM9250v1_protein.faa	Leuconostoc_kimchii	37.8449
Leuconostocaceae_Weissella_ceti_WS74	GCF_000750535.1_ASM75053v1_protein.faa	Weissella_ceti	40.75
Lactobacillaceae_Pediococcus_claussenii_P06_ATCC_BAA_344	GCF_000237995.1_ASM23799v2_protein.faa	Pediococcus_claussenii	37.0157
Carnobacteriaceae_Allofustis_seminis_DSM_15817	GCF_000374325.1_ASM37432v1_protein.faa	Allofustis_seminis	37.6
Carnobacteriaceae_Alloiococcus_otitis_ATCC_51267	GCF_000315445.1_Allo_otit_ATCC_51267_V1_protein.faa	Alloiococcus_otitis	44.65
Carnobacteriaceae_Dolosigranulum_pigrum_ATCC_51524	GCF_000245815.1_Dolo_pigr_ATCC_51524_V1_protein.faa	Dolosigranulum_pigrum	39.6
Carnobacteriaceae_Lacticigenium_naphtae_DSM_19658	GCF_000425865.1_ASM42586v1_protein.faa	Lacticigenium_naphtae	37.7
Carnobacteriaceae_Atopococcus_tabaci_DSM_17538	GCF_000429585.1_ASM42958v1_protein.faa	Atopococcus_tabaci	45.6
Aerococcaceae_Aerococcus_urinae_ACS_120_V_Col10a	GCF_001543175.1_ASM154317v1_protein.faa	Aerococcus_urinae	42.4
Carnobacteriaceae_Granulicatella_elegans_ATCC_700633_genomic_scaffold_supercont1.2	GCF_000162475.2_Gran_ele_ATCC_700633_V2_protein.faa	Granulicatella_elegans	33.4
Carnobacteriaceae_Atopobacter_phocae_ATCC_BAA_285	GCF_000526675.1_ASM52667v1_protein.faa	Atopobacter_phocae	34.6
Enterococcaceae_Bavariicoccus_seileri_DSM_19936	GCF_000421665.1_ASM42166v1_protein.faa	Bavariicoccus_seileri	37.95
Aerococcaceae_Eremococcus_coleocola_ACS_139_V_Col8_contig00001	GCF_000428865.1_ASM42886v1_protein.faa	Eremococcus_coleocola	38.9
Aerococcaceae_Facklamia_ignava_CCUG_37419	GCF_000301055.1_Fack_igna_CCUG_37419_V1_protein.faa	Facklamia_ignava	39
Aerococcaceae_Abiotrophia_defectiva_ATCC_49176	GCF_000160075.2_ASM16007v2_protein.faa	Abiotrophia_defectiva	47
Aerococcaceae_Globicatella_sulfidifaciens_DSM_15739	GCF_900167405.1_IMG-taxon_2524614644_annotated_assembly_protein.faa	Globicatella_sulfidifaciens	35.35
Streptococcaceae_Lactococcus_garvieae_Lg2	GCF_000269925.1_ASM26992v1_protein.faa	Lactococcus_garvieae	38.45
Streptococcaceae_Streptococcus_mutans_GS_5	GCF_000007465.2_ASM746v2_protein.faa	Streptococcus_mutans	36.8
Enterococcaceae_Tetragenococcus_halophilus_NBRC_12172	GCF_000283615.1_ASM28361v1_protein.faa	Tetragenococcus_halophilus	35.7
Enterococcaceae_Enterococcus_faecalis_D32	GCF_000007785.1_ASM778v1_protein.faa	Enterococcus_faecalis	37.4
Enterococcaceae_Melissococcus_plutonius_ATCC_35311	GCF_000747585.1_ASM74758v1_protein.faa	Melissococcus_plutonius	31.1
Enterococcaceae_Catellicoccus_marimammalium_M35043	GCF_000313915.1_CMarimammalium1.0_protein.faa	Catellicoccus_marimammalium	33.9
Carnobacteriaceae_Carnobacterium_maltaromaticum_LMA28	GCF_000317975.2_ASM31797v2_protein.faa	Carnobacterium_maltaromaticum	34.4
		mean	38.0383
		median	37.7
		max	47
		min	31.1

## Sheet: Oceanospirillales
Full taxon name	Proteome file	Genus_species	GC-contnet
Alcanivorax_borkumensis_SK2	GCF_000009365.1	Alcanivorax borkumensis SK2	54.75
Amphritea_japonica_ATCC_BAA_1530	GCF_000381785.1	Amphritea japonica	47.5		mean	52.6632
Balneatrix_alpica_DSM_16621	GCF_000619885.1	Balneatrix alpica	54.4		median	54.15
Carnimonas_nigrificans_ATCC_BAA_78	GCF_000526695.1	Carnimonas nigrificans	56.2		max	64.5
Chromohalobacter_salexigens_1H11_DSM_3043	GCF_000055785.1	Chromohalobacter salexigens	63.9		min	41.05
Cobetia_marina_KMM_296	GCF_001720485.1	Cobetia marina	62.3
Endozoicomonas_montiporae_LMG_24815	NF
Hahella_chejuensis_KCTC_2396	GCF_000012985.1	Hahella chejuensis	53.9
Halomonas_elongata_DSM_2581	GCF_000196875.2	Halomonas elongata	63.6
Halotalea_alkalilenta_DSM_17697	GCF_001648175.1	Halotalea alkalilenta	64.5
Kushneria_aurantia_DSM_21353	GCF_000382245.1	Kushneria aurantia	62.7
Marinomonas_mediterranea_MMB_1	GCF_000192865.1	Marinomonas mediterranea	44.1
Marinospirillum_insulare_DSM_21763	GCF_000686905.1	Marinospirillum insulare	43.1
Neptuniibacter_caesariensis_MED92	NF	Neptuniibacter caesariensis	47.8
Neptunomonas_japonica_DSM_18939	GCF_000422765.1	Neptunomonas japonica	43.7
Nitrincola_lacisaponensis_4CA	GCF_000691225.1	Nitrincola lacisaponensis	52.1
Oceanobacter_kriegii_DSM_6294	GCF_000422845.1	Oceanobacter kriegii	55.3
Oceanospirillales_Kangiella_koreensis_DSM_16069	GCF_000024085.1	Kangiella koreensis	43.7
Oceanospirillum_maris_DSM_6286	GCF_000422865.1	Oceanospirillum maris	45.9
Saccharospirillum_impatiens_DSM_12546	GCF_000423605.1	Saccharospirillum impatiens	55.4
Thalassolituus_oleivorans_R6_15	GCF_000355675.1	Thalassolituus oleivorans	46.6
Zooshikella_ganghwensis_DSM_15267	GCF_000428585.1	Zooshikella ganghwensis	41.05
Zymobacter_palmae_DSM_10491	GCF_003610015.1	Zymobacter palmae	56.0913

## Sheet: Selenomonadales
Full taxon name	Proteome file	Genus_species	GC-contnet
Veillonella parvula DSM 2008	GCF_000024945.1_ASM2494v1	Veillonella parvula	38.6504
Acidaminococcus fermentans DSM 20731	GCF_000025305.1_ASM2530v1	Acidaminococcus fermentans	55.95		mean	46.6063
Mitsuokella multacida DSM 20544	GCF_000155955.1_ASM15595v1	Mitsuokella multacida	58.15		median	48.9
Dialister micraerophilus DSM 19965	GCF_000194985.1_ASM19498v1	Dialister micraerophilus	35.65		max	58.15
Centipeda periodontii DSM 2778	GCF_000213975.1_ASM21397v1	Centipeda periodontii	55.8		min	35.65
Acetonema longum DSM 6540	GCF_000219125.1_ASM21912v1	Acetonema longum	50.4
Anaeroglobus geminatus F0357	GCF_000239275.1_ASM23927v1	Anaeroglobus geminatus	49
Selenomonas ruminantium subsp. lactilytica TAM6421	GCF_000284095.1_ASM28409v1	Selenomonas ruminantium	50
Anaeromusa acidaminophila DSM 3853	GCF_000374545.1_ASM37454v1	Anaeromusa acidaminophila	48.8
Propionispira raffinosivorans DSM 20765	GCF_000381065.1_ASM38106v1	Propionispira raffinosivorans	38.1
Succinispira mobilis DSM 6222	GCF_000384135.1_ASM38413v1	Succinispira mobilis	36.2
Anaeroarcus burkinensis DSM 6283	GCF_000430605.1_ASM43060v1	Anaeroarcus burkinensis	49
Sporomusa ovata DSM 2662	GCF_000445445.1_SOV1	Sporomusa ovata	43.3
Sporolituus thermophilus DSM 23256	GCF_900102435.1_IMG-taxon_2599185233	Sporolituus thermophilus	52.3
Allisonella histaminiformans strain DSM 15230	GCF_900103425.1_IMG-taxon_2595698240	Allisonella histaminiformans	46.4
Propionispira arboris strain DSM 2179	GCF_900109225.1_IMG-taxon_2602042026	Propionispira arboris	38

## Sheet: Xanthomonadaceae
Full taxon name	Proteome file	Genus_species	GC-contnet
Arenimonas_donghaensis_DSM_18148_HO3_R19	GCF_000743535.1	Arenimonas donghaensis	68.7
Arenimonas_oryziterrae_DSM_21050	GCF_000420545.1	Arenimonas oryziterrae	65.65
Dyella_japonica_A8	GCF_000725385.1	Dyella japonica	65
Frateuria_aurantia_Kondo_67_DSM_6220	GCF_000242255.2	Frateuria aurantia	63.4
Frateuria_terrea_CGMCC_1.7053	GCF_900115705.1	Frateuria terrea	67.9
Ignatzschineria_larvae_DSM_13226	GCF_000510805.1	Ignatzschineria larvae	40.5
Luteimonas_mephitis_DSM_12574	GCF_000422305.1	Luteimonas mephitis	68.5
Lysobacter_antibioticus_HS124	GCF_000336385.2	Lysobacter antibioticus	66.95
Lysobacter_defluvii_DSM_18482	GCF_000423325.1	Lysobacter defluvii	70.25
Pseudoxanthomonas_spadix_BD_a59	GCF_000233915.3	Pseudoxanthomonas spadix	68
Rudaea_cellulosilytica_DSM_22992	GCF_000378125.1	Rudaea cellulosilytica	63.7
Silanimonas_lenta_DSM_16282	GCF_000429065.1	Silanimonas lenta	71.1
Stenotrophomonas_maltophilia_K279a	GCF_000072485.1	Stenotrophomonas maltophilia	66.4
Thermomonas_fusca_DSM_15424	GCF_000423885.1	Thermomonas fusca	68.15
Wohlfahrtiimonas_chitiniclastica_DSM_18708	GCF_000375345.1	Wohlfahrtiimonas chitiniclastica	43.7
Xanthomonas_axonopodis_Xac29_1	GCF_000348585.1	Xanthomonas axonopodis	64.6
Xanthomonas_oryzae_ATCC_35933	GCF_000482445.1	Xanthomonas oryzae	63.7
Xylella_fastidiosa_multiplex_ATCC_35871	GCF_000428665.1	Xylella fastidiosa	51.8
		mean	63.2222
		median	66.025
		max	71.1
		min	40.5

## Sheet: Rhodospirillales
Full taxon name	Proteome file	Genus_species	GC-contnet
Magnetospirillum magneticum AMB-1	GCF_000009985.1	Magnetospirillum magneticum	65.1
Acetobacter pasteurianus IFO 3283-01	GCF_000010825.1_ASM1082v1_protein	Acetobacter pasteurianus	52.9714			mean	63.974
Rhodospirillum rubrum ATCC 11170	GCF_000013085.1_ASM1308v1_protein	Rhodospirillum rubrum	64.9658			median	65.0329
Granulibacter bethesdensis CGDNIH1	GCF_000014285.2_ASM1428v2_protein	Granulibacter bethesdensis	59.05			max	73.4
Gluconacetobacter diazotrophicus PA1 5	GCF_000021325.1_ASM2132v1_protein	Gluconacetobacter diazotrophicus	66.2969			min	51.2
Komagataeibacter medellinensis NBRC 3288	GCF_000182745.2_ASM18274v1_protein	Komagataeibacter medellinensis	60.5831
Acidiphilium multivorum AIU301	GCF_000202835.1	Acidiphilium multivorum	66.9427
Tistrella mobilis KA081020-065	GCF_000264455.2_ASM26445v2_protein	Tistrella mobilis	68.058
Oceanibaculum indicum P24	GCF_000299935.1_ASM29993v1_protein	Oceanibaculum indicum	65.5
Thalassospira profundimaris WP0211	GCF_000300275.1_ASM30027v1_protein	Thalassospira profundimaris	54.8
Gluconobacter oxydans H24	GCF_000311765.1	Gluconobacter oxydans	60.8709
Reyranella massiliensis 521	GCF_000312425.1_ASM31242v1_protein	Reyranella massiliensis	64.8
Caenispirillum salinarum AK4	GCF_000315795.1_Caenispirillum_salinarum_protein	Caenispirillum salinarum	68.8
Saccharibacter floricola DSM 15669	GCF_000378165.1_ASM37816v1_protein	Saccharibacter floricola	51.2
Elioraea tepidiphila DSM 17972	GCF_000378465.1_ASM37846v1_protein	Elioraea tepidiphila	71.3
Novispirillum itersonii subsp. itersonii ATCC 12639	GCF_000381985.1_ASM38198v1_protein	Novispirillum itersonii	63.1
Fodinicurvata sediminis DSM 21159	GCF_000420625.1_ASM42062v1_protein	Fodinicurvata sediminis	60.6
Inquilinus limosus DSM 16000	GCF_000423185.1_ASM42318v1_protein	Inquilinus limosus	69.9
Thalassobaculum salexigens DSM 19539	GCF_000423805.1_ASM42380v1_protein	Thalassobaculum salexigens	67.4
Rubritepida flocculans DSM 14296	GCF_000425365.1_ASM42536v1_protein	Rubritepida flocculans	73.4
Nisaea denitrificans DSM 18348	GCF_000426505.1_ASM42650v1_protein	Nisaea denitrificans	60.5
Niveispirillum irakense DSM 11586	GCF_000429645.1_ASM42964v1_protein	Niveispirillum irakense	62.9
Rhodovibrio salinarum DSM 9154	GCF_000515255.1_ASM51525v1_protein	Rhodovibrio salinarum	66
Skermanella stibiiresistens SB22	GCF_000576635.1_genome_protein	Skermanella stibiiresistens	65.9
Asaia platycodi JCM 25414	GCF_000614545.1_ASM61454v1_protein	Asaia platycodi	59.6
Acidocella facilis ATCC 35904	GCF_000687875.1_ASM68787v1_protein	Acidocella facilis	64.5
Nitrospirillum amazonense CBAmc	GCF_000730165.1_ASM73016v2_protein	Nitrospirillum amazonense	67.4979
Belnapia moabensis DSM 16746	GCF_000745835.1_ASM74583v1_protein	Belnapia moabensis	68.9
Kozakia baliensis	GCF_001787335.1_ASM178733v1_protein	Kozakia baliensis	57.425
Roseomonas mucosa	GCF_008693785.1_ASM869378v1_protein	Roseomonas mucosa	70.358

## Sheet: Micrococcineae
Full taxon name	Proteome file	Genus_species	GC-contnet
Kocuria rhizophila DC2201	GCF_000010285.1_ASM1028v1_protein	Kocuria rhizophila	70.7			mean	68.2895
Renibacterium salmoninarum ATCC 33209	GCF_000018885.1_ASM1888v1_protein	Renibacterium salmoninarum	66.3			median	69.65
Micrococcus luteus NCTC 2665	GCF_000023205.1_ASM2320v1_protein	Micrococcus luteus	73			max	74.7
Jonesia denitrificans DSM 20603	GCF_000024065.1_ASM2406v1_protein	Jonesia denitrificans	58.4			min	55.6
Sanguibacter keddieii DSM 10542	GCF_000024925.1_ASM2492v1_protein	Sanguibacter keddieii	68.65
Xylanimonas cellulosilytica DSM 15894	GCF_000024965.1_ASM2496v1_protein	Xylanimonas cellulosilytica	68.9827
Cellulomonas flavigena DSM 20109	GCF_000092865.1_ASM9286v1_protein	Cellulomonas flavigena	70.4
Intrasporangium calvum DSM 43043	GCF_000184685.1_ASM18468v1_protein	Intrasporangium calvum	70.75
Pseudarthrobacter phenanthrenivorans Sphe3	GCF_000189535.1_ASM18953v1_protein	Pseudarthrobacter phenanthrenivorans	65.3911
Isoptericola variabilis 225	GCF_000215105.1_ASM21510v1_protein	Isoptericola variabilis	73.9
Serinicoccus profundi MCCC 1A05965	GCF_000224715.1_ASM22471v2_protein	Serinicoccus profundi	71.95
Leucobacter chromiiresistens JG 31	GCF_000231305.1_ASM23130v1_protein	Leucobacter chromiiresistens	70.3
Mobilicoccus pelagius NBRC 104925	GCF_000247995.1_ASM24799v2_protein	Mobilicoccus pelagius	71.9
Austwickia chelonae NBRC 105200	GCF_000298175.1_ASM29817v1_protein	Austwickia chelonae	66.2
Kineosphaera limosa NBRC 100340	GCF_000298215.1_ASM29821v1_protein	Kineosphaera limosa	70.4
Curtobacterium flaccumfaciens UCD-AKU	GCF_000349565.1_Curtobacterium_flaccumfaciens_UCD-AKU_protein	Curtobacterium flaccumfaciens	70.95
Tetrasphaera elongata Lp2	GCF_000367525.1_ASM36752v2_protein	Tetrasphaera elongata	68.8
Acaricomes phytoseiuli DSM 14247	GCF_000376245.1_ASM37624v1_protein	Acaricomes phytoseiuli	62.3
Demetria terragena DSM 11295	GCF_000376825.1_ASM37682v1_protein	Demetria terragena	64.7
Gryllotalpicola ginsengisoli DSM 22003	GCF_000419445.1_ASM41944v1_protein	Gryllotalpicola ginsengisoli	70.9
Yaniella halotolerans DSM 15476	GCF_000420805.1_ASM42080v1_protein	Yaniella halotolerans	55.6
Glaciibacter superstes DSM 21135	GCF_000421145.1_ASM42114v1_protein	Glaciibacter superstes	64.4
Ornithinimicrobium pekingense DSM 21552	GCF_000421185.1_ASM42118v1_protein	Ornithinimicrobium pekingense	72.9
Agromyces subbeticus DSM 16689	GCF_000421565.1_ASM42156v1_protein	Agromyces subbeticus	69.1
Nesterenkonia alba DSM 19423	GCF_000421745.1_ASM42174v1_protein	Nesterenkonia alba	63.7
Humibacter albus DSM 18994	GCF_000421825.1_ASM42182v1_protein	Humibacter albus	68
Agrococcus lahaulensis DSM 17612	GCF_000425105.1_ASM42510v1_protein	Agrococcus lahaulensis	72.8
Gulosibacter molinativorax DSM 13485	GCF_000425685.1_ASM42568v1_protein	Gulosibacter molinativorax	64.3
Arsenicicoccus bolidensis DSM 15745	GCF_000426385.1_ASM42638v1_protein	Arsenicicoccus bolidensis	71.8
Leifsonia xyli subsp. cynodontis DSM 46306	GCF_000470775.1_ASM47077v1_protein	Leifsonia xyli	68.1
Actinotalea ferrariae CF5-4	GCF_000603945.1_genome_protein	Actinotalea ferrariae	73.8
Paraoerskovia marina DSM 21750	GCF_000701465.1_ASM70146v1_protein	Paraoerskovia marina	70.75
Rathayibacter toxicus	GCF_001465855.1_ASM146585v1_protein	Rathayibacter toxicus	61.5
Cellulosimicrobium cellulans	GCF_001722485.1_ASM172248v1_protein	Cellulosimicrobium cellulans	74.7
Salinibacterium amurskyense	GCF_002797685.1_ASM279768v1_protein	Salinibacterium amurskyense	61.9
Microbacterium paraoxydans	GCF_900105335.1_IMG-taxon_2634166897_annotated_assembly_protein	Microbacterium paraoxydans	70.2

## Sheet: Chromatiales
Full taxon name	Proteome file	Genus_species	GC-contnet
Alkalilimnicola_ehrlichii_MLHE_1	GCF_000014785.1	Alkalilimnicola ehrlichii	58.6
Allochromatium_vinosum_DSM_180	GCF_000025485.1	Allochromatium vinosum	64.2117
Arhodomonas_aquaeolei_DSM_8974	GCF_000374645.1	Arhodomonas aquaeolei	69.4
Ectothiorhodospiraceae_bacterium_M19_40	GCF_000319575.2	Spiribacter salinus	62
Halorhodospira_halochloris_A	GCF_002356555.2	Halorhodospira halochloris	56
Halothiobacillus_neapolitanus_c2	GCF_000024765.1	Halothiobacillus neapolitanus	54.7
Lamprocystis_purpurea_DSM_4197	GCF_000379525.1	Lamprocystis purpurea	64.3
Marichromatium_purpuratum_987	NF					mean	60.4006
Nitrococcus_mobilis_Nb_231	GCF_000153205.1	Nitrococcus mobilis	59.9			median	62.15
Nitrosococcus_oceani_C_107_ATCC_19707	GCF_000012805.1	Nitrosococcus oceani	50.3			max	69.4
Rheinheimera_nanhaiensis_E407_8	GCF_000296695.1	Rheinheimera nanhaiensis	51.3			min	50.3
Thioalkalivibrio_nitratireducens_DSM_14787	GCF_000321415.2	Thioalkalivibrio nitratireducens	64.45
Thiocapsa_marina_5811_DSM_5653	GCF_000223985.1	Thiocapsa marina	64.1
Thiocystis_violascens_611_DSM_198	GCF_000227745.2	Thiocystis violascens	62.6
Thioflavicoccus_mobilis_8321	GCF_000327045.1	Thioflavicoccus mobilis	65.5486
Thiorhodococcus_drewsii_AZ1	GCF_000224065.1	Thiorhodococcus drewsii	62.3
Thiorhodospira_sibirica_A12_ATCC_700588	GCF_000227725.1	Thiorhodospira sibirica	56.7

## Sheet: Alteromonadaceae
Full taxon name	Proteome file	Genus_species	GC-contnet
Aestuariibacter_salexigens_DSM_15300	GCF_000429145.1	Aestuariibacter salexigens	48.5
Agarivorans_albus_MKT_106	GCF_000414175.1	Agarivorans albus	44.2
Algicola_sagamiensis_DSM_14643	GCF_000374485.1	Algicola sagamiensis	42.8		mean	47.6884
Alishewanella_agri_BL06	GCF_000272005.1	Alishewanella agri	50.6		median	45.9
Alteromonas_macleodii_Black_Sea_11	GCF_000299995.1	Alteromonas macleodii	44.5		max	66.1
Catenovulum_agarivorans_YM01	GCF_000281085.1	Catenovulum agarivorans	40.35		min	38
Colwellia_psychrerythraea_34H	GCF_000012325.1	Colwellia psychrerythraea	38
Ferrimonas_balearica_DSM_9799	GCF_000148645.1	Ferrimonas balearica	60.2
Gayadomonas_joobiniege_G7	GCF_000300815.1	Gayadomonas joobiniege	41.4213
Gilvimarinus_chinensis_DSM_19667	GCF_000377745.1	Gilvimarinus chinensis	51.2
Glaciecola_nitratireducens_FR1064	GCF_000226565.1	Glaciecola nitratireducens	42.3
Haliea_rubra_CM41_15a_DSM_19751	GCF_000764025.1	Pseudohaliea rubra	66.1
Haliea_salexigens_DSM_19537	GCF_000423125.1	Haliea salexigens	59.9
Idiomarina_loihiensis_L2TR	GCF_000008465.1	Idiomarina loihiensis	46.95
Marinimicrobium_agarilyticum_DSM_16975	GCF_000423345.1	Marinimicrobium agarilyticum	57.9
Marinobacterium_litorale_DSM_23545	GCF_000428985.1	Marinobacterium litorale	56.4
Moritella_marina_ATCC_15381	GCF_000291685.1	Moritella marina	40.5
Pseudoalteromonas_atlantica_T6c	GCF_000014225.1	Pseudoalteromonas atlantica	41
Psychromonas_ingrahamii_37	GCF_000015285.1	Psychromonas ingrahamii	40.1
Saccharophagus_degradans_2_40	GCF_000013665.1	Saccharophagus degradans	45.8
Salinimonas_chungwhensis_DSM_16280	GCF_000378185.1	Salinimonas chungwhensis	47
Shewanella_oneidensis_MR_1	GCF_013267215.1	Shewanella oneidensis	46
Teredinibacter_turnerae_T7902	GCF_000379165.1	Teredinibacter turnerae	51
Thalassotalea_agarivorans_DSM_19706	GCF_900111755.1	Thalassotalea agarivorans	41.8

[truncated: 11 more sheets: Archaea_Methanomicrobia, Cytophagales, Bacillaceae, Comamonadaceae, Enterobacteriaceae, Archaea_DPANN, Archaea_Halobacteriaceae, Archaea_Thaumarchaeota, Archaea_Thermoprotei, Euk_Pezizomycotina, Euk_Coelomata]
