# Supplementary material for: The Structure of Evolutionary Model Space for Proteins Across the Tree of Life
Source: Preprints.org preprint supplement (doi:10.20944/preprints202212.0403.v1), 2022-12-21
Supplement: Supplementary file 3 [file Scolaro_Braun_Supplementary_File_S2.xlsx]

## Sheet: 1. Validation
Clade	Domain	Median GC	% precise match all prot	% arch all prot	% euk all prot	% bact all prot	% all prot	% precise match ribo	% arch ribo	% euk ribo	% bact ribo	% ribo		%match Halobacteriaceae	%match Thermoprotei	%match Micrococcineae		group	Median GC	% exact match all-or-ribo	% arch all-or-ribo	% euk all-or-ribo	% bact all-or-ribo
Archaea_DPANN	Archaea	34.05	2.69672	31.0324	8.33166	29.04	68.4041	2.37472	10.0825	1.42886	20.0845	31.5959		3.05897	8.99577	0.261622		Archaea_DPANN	34.05	5.07144	41.1149	9.76052	49.1246
Archaea_Thaumarchaeota	Archaea	34.2	19.4444	26.2077	2.89855	26.087	55.1932	5.67633	11.4734	2.77778	30.5556	44.8068		5.7971	2.53623	0.603865		Archaea_Thaumarchaeota	34.2	25.1208	37.6812	5.67633	56.6425
Archaea_Methanomicrobia	Archaea	47.4	13.9869	47.7778	7.2549	15.6863	70.719	4.5098	7.71242	0.261438	21.3072	29.281		8.56209	5.81699	3.59477		Archaea_Methanomicrobia	47.4	18.4967	55.4902	7.51634	36.9935
Archaea_Thermoprotei	Archaea	49	58.75	65.9375	6.5625	3.90625	76.4062	7.1875	10.625	0.625	12.3438	23.5938		1.40625	65.9375	1.5625		Archaea_Thermoprotei	49	65.9375	76.5625	7.1875	16.25
Archaea_Halobacteriaceae	Archaea	63.7	58.2584	66.2347	4.67963	12.455	83.3693	7.12743	8.96328	0.179986	7.4874	16.6307		65.4068	1.33189	2.62779		Archaea_Halobacteriaceae	63.7	65.3858	75.198	4.85961	19.9424
Lactobacillales	Bacteria	37.7	13.6042	14.0459	11.0424	28.3569	53.4452	5.30035	10.5124	0.971731	35.0707	46.5548		5.38869	4.59364	1.59011		Lactobacillales	37.7	18.9046	24.5583	12.0141	63.4276
Cytophagales	Bacteria	40.6	11.7647	8.82353	7.35294	50	66.1765	1.47059	1.47059	0	32.3529	33.8235		0	2.94118	1.47059		Cytophagales	40.6	13.2353	10.2941	7.35294	82.3529
Bacillaceae	Bacteria	42.15	10.9157	31.7518	11.0153	29.8938	72.6609	0.928998	5.17585	0.132714	22.0305	27.3391		10.5176	5.34174	2.55474		Bacillaceae	42.15	11.8447	36.9277	11.148	51.9244
Alteromonadaceae	Bacteria	45.9	6.71824	8.87622	6.14821	37.215	52.2394	0.610749	4.68241	0.162866	42.9153	47.7606		5.08958	2.52443	6.22964		Alteromonadaceae	45.9	7.32899	13.5586	6.31107	80.1303
Selenomonadales	Bacteria	48.9	14.2195	20.5564	8.73261	34.3895	63.6785	0.463679	8.11437	0.618238	27.4343	36.1669		11.2828	2.70479	2.08655		Selenomonadales	48.9	14.6832	28.6708	9.35085	61.8238
Enterobacteriaceae	Bacteria	52.1753	16.74	15.06	6.82	44.08	65.96	1.54	3.46	0.16	30.42	34.04		4.58	0.7	0.72		Enterobacteriaceae	52.1753	18.28	18.52	6.98	74.5
Oceanospirillales	Bacteria	54.4	1.09751	11.2284	7.00718	43.6049	61.8404	0.422119	6.58506	0.464331	31.1102	38.1596		7.76699	3.08147	7.68257		Oceanospirillales	54.4	1.51963	17.8134	7.47151	74.7151
Chromatiales	Bacteria	62.15	16.2377	17.548	6.17688	49.1343	72.8591	4.81984	4.07113	0.327562	22.7422	27.1409		12.2134	0.795508	5.00702		Chromatiales	62.15	21.0576	21.6191	6.50445	71.8765
Rhodospirillales	Bacteria	65.0329	27.6343	9.37427	7.09467	60.8979	77.3668	2.14003	5.53617	0.279135	16.8179	22.6332		6.69923	2.37264	15.3291		Rhodospirillales	65.0329	29.7744	14.9104	7.37381	77.7157
Comamonadaceae	Bacteria	65.3813	17.6226	7.78609	6.31754	59.601	73.7046	0.665004	2.05043	0.387919	23.857	26.2954		4.15628	0.997506	5.73566		Comamonadaceae	65.3813	18.2876	9.83652	6.70546	83.458
Xanthomonadacae	Bacteria	66.025	9.33269	7.64023	10.3482	55.9961	73.9845	0.290135	4.0619	0.435203	21.5184	26.0155		5.12573	1.30561	8.17215		Xanthomonadacae	66.025	9.62282	11.7021	10.7834	77.5145
Micrococcineae	Bacteria	69.65	34.9799	7.46868	5.08154	63.6729	76.2231	1.27629	7.89411	0.236351	15.6464	23.7769		10.0449	1.98535	36.2562		Micrococcineae	69.65	36.2562	15.3628	5.31789	79.3193
Euk_Coelomata	Euk	40.7158	8.53278	23.4755	10.9886	19.3548	53.8189	2.20604	27.4506	4.97399	13.7565	46.1811		4.78668	4.97399	0.437045		Euk_Coelomata	40.7158	10.7388	50.9261	15.9625	33.1113
Euk_Pezizomycotina	Euk	48.9	14.2406	27.443	37.9824	14.6017	80.0271	0.564207	5.98059	1.64748	12.3448	19.9729		3.67863	2.61792	1.19612		Euk_Pezizomycotina	48.9	14.8048	33.4236	39.6299	26.9465
						min =	52.2394				min =	16.6307
						max =	83.3693				max =	47.7606

## Sheet: 2. Training
Clade	Domain	% precise match all prot	% arch all prot	% euk all prot	% bact all prot	% all prot	% precise match ribo	% arch ribo	% euk ribo	% bact ribo	% ribo		%match Halobacteriaceae	%match Thermoprotei	%match Micrococcineae
Archaea_DPANN	Archaea	5.6	29	10.2	29.6	68.8	2.4	9.9	1.9	19.4	31.2		2.4	7.1	0.1
Archaea_Halobacteriaceae	Archaea	59.9	67.9	4.9	10.1	82.9	6.7	8.9	0.2	8	17.1		66.6	1	1.7
Archaea_Methanomicrobia	Archaea	16.3	45.5	8.5	20.6	74.6	3.3	6.9	0.1	18.4	25.4		8.9	5.7	3.7
Archaea_Thaumarchaeota	Archaea	19.4444	26.2077	2.89855	26.087	55.1932	5.67633	11.4734	2.77778	30.5556	44.8068		5.7971	2.53623	0.603865
Archaea_Thermoprotei	Archaea	58.75	65.9375	6.5625	3.90625	76.4062	7.1875	10.625	0.625	12.3438	23.5938		1.40625	65.9375	1.5625
Alteromonadaceae	Bacteria	7.8	9.6	6.3	37.3	53.2	0.6	5.4	0.2	41.2	46.8		4.9	3.3	6.8
Bacillaceae	Bacteria	10.6	33.3	10.1	28.7	72.1	0.9	6.2	0.4	21.3	27.9		11.2	4.9	1.9
Chromatiales	Bacteria	18.3	18.7	7.1	51.4	77.2	3.4	3.4	0.3	19.1	22.8		13	1.4	5.7
Comamonadaceae	Bacteria	18.4	7.2	5.8	60.2	73.2	0.2	2.3	0.4	24.1	26.8		3.9	1.3	7.7
Cytophagales	Bacteria	11.7647	8.82353	7.35294	50	66.1765	1.47059	1.47059	0	32.3529	33.8235		0	2.94118	1.47059
Enterobacteriaceae	Bacteria	15.8	14.3	8.1	38.7	61.1	0.6	3.7	0.4	34.8	38.9		4.4	1.2	0.8
Lactobacillales	Bacteria	18.2186	14.2713	12.3482	33.0972	59.7166	5.76923	9.31174	0.506073	30.4656	40.2834		5.36437	4.8583	2.02429
Micrococcineae	Bacteria	40.5	6.7	5.6	66	78.3	0.9	8.7	0.4	12.6	21.7		10.1	1.9	41.4
Oceanospirillales	Bacteria	2.4	9.8	6.8	38.1	54.7	1.1	8.1	0.7	36.5	45.3		5.5	3.3	7.9
Rhodospirillales	Bacteria	29.1	7.5	8.5	61.2	77.2	2.7	5.9	0.4	16.5	22.8		5.9	2.9	16
Selenomonadales	Bacteria	15.2	19	9.9	35.8	64.7	0.7	8.2	0.5	26.6	35.3		10.6	1.4	3.4
Xanthomonadaceae	Bacteria	12.7	8.5	8.3	56.1	72.9	1.1	4.3	0.3	22.5	27.1		4.4	1.6	6.2
Euk_Coelomata	Euk	6.2	23.3	8.8	21.1	53.2	1.8	25.8	4	17	46.8		6	4.3	0.8
Euk_Pezizomycotina	Euk	13.7	23.6	39.3	18.2	81.1	0.6	5.4	1.7	11.8	18.9		3.5	4	1.7
					min =	53.2				min =	17.1
					max =	82.9				max =	46.8

## Sheet: 3. Validation - all models
group	Domain	Median GC	% general model	% pubspecific model	% precise match all prot	% arch all prot	% euk all prot	% bact all prot	% all prot	% precise match ribo	% arch ribo	% euk ribo	% bact ribo	% ribo
Archaea_DPANN	Archaea	34.05	47.27	16.56	1.31	12.68	1.25	3.98	17.91	1.73	5.45	0.85	11.95	18.25
Archaea_Halobacteriaceae	Archaea	63.7	10.55	15.01	50.14	53.28	0.97	7.7	61.95	6.37	7.74	0.14	4.61	12.49
Archaea_Methanomicrobia	Archaea	47.4	28.43	20.26	8.82	24.77	0.72	7.91	33.4	2.94	4.58	0.13	13.2	17.91
Archaea_Thaumarchaeota	Archaea	34.2	33.82	21.8	4.35	7.61	0	8.82	16.43	1.93	4.95	1.81	16.67	23.43
Archaea_Thermoprotei	Archaea	49	5.78	9.06	53.75	57.97	3.75	2.19	63.91	7.03	10.31	0.63	10.31	21.25
Alteromonadaceae	Bacteria	45.9	21.5	32.13	2.61	3.05	0.2	15.31	18.57	0.53	2.52	0.08	25.2	27.81
Bacillaceae	Bacteria	42.15	38.35	22.59	4.35	12.44	0.36	11.88	24.68	0.76	2.65	0.07	11.65	14.37
Chromatiales	Bacteria	62.15	18.53	41.97	6.83	7.16	0.09	21.95	29.2	1.87	1.82	0.09	8.38	10.29
Comamonadaceae	Bacteria	65.38	14.35	45.25	9.48	2.13	0.55	26.79	29.48	0.58	0.83	0.14	9.95	10.92
Cytophagales	Bacteria	40.6	20.59	39.71	4.41	1.47	0	20.59	22.06	1.47	1.47	0	16.18	17.65
Enterobacteriaceae	Bacteria	52.18	24.96	44.42	4.78	3.18	0.72	12.66	16.56	1.12	1.34	0.1	12.62	14.06
Lactobacillales	Bacteria	37.7	19.7	20.05	8.75	6.71	2.12	16.43	25.27	4.33	9.63	0.62	24.73	34.98
Micrococcineae	Bacteria	69.65	18.46	19.55	29.83	3.66	0.33	43.84	47.84	1.02	4.7	0.09	9.36	14.16
Oceanospirillales	Bacteria	54.4	22.12	31.11	0.68	4.47	0.08	21.02	25.58	0.3	3.46	0.21	17.52	21.19
Rhodospirillales	Bacteria	65.03	22.52	25.26	18.42	2.91	0.23	36.87	40.01	1.37	2.98	0.16	9.07	12.21
Selenomonadales	Bacteria	48.9	12.36	32.38	7.19	11.36	2.78	18.01	32.15	0.46	6.26	0.46	16.38	23.11
Xanthomonadacae	Bacteria	66.03	25.19	35.98	3.58	2.13	0.48	24.76	27.37	0.29	1.69	0.1	9.67	11.46
Euk_Coelomata	Euk	40.72	53.38	23.62	0.23	2.23	0.4	5.56	8.18	0.62	6.24	1.94	6.64	14.82
Euk_Pezizomycotina	Euk	48.9	19.34	50.51	1.6	6.45	7.2	3.68	17.33	0.41	4.97	1.04	5.8	11.8
		min =	5.78	9.06				min =	8.18				min =	10.29
		max =	53.38	50.51				max =	63.91				max =	34.98

## Sheet: 4. Training - all models
Clade	Domain	Median GC	% general model	% pubspecific model	% precise match all prot	% arch all prot	% euk all prot	% bact all prot	% all prot	% precise match ribo	% arch ribo	% euk ribo	% bact ribo	% ribo
Archaea_DPANN	Archaea	34.05	46.8	13.7	3.2	14	1.6	4.3	19.9	1.9	5.5	1.3	12.8	19.6
Archaea_Halobacteriaceae	Archaea	63.7	9.9	15.9	51.1	53.9	1.4	6	61.3	5.7	7.6	0.1	5.2	12.9
Archaea_Methanomicrobia	Archaea	47.4	28.1	20.1	10.3	23.4	0.6	11.6	35.6	2.1	4.3	0	11.9	16.2
Archaea_Thaumarchaeota	Archaea	34.2	33.0519	26.2967	4.58384	7.72014	0.120627	8.20265	15.8022	2.53317	5.79011	0.844391	17.9735	24.608
Archaea_Thermoprotei	Archaea	49	5.78125	9.0625	53.75	57.9688	3.75	2.1875	63.9062	7.03125	10.3125	0.625	10.3125	21.25
Alteromonadaceae	Bacteria	45.9	20.2	34.4	3.6	3.9	0.5	16.7	21.1	0.5	2.6	0.2	21.5	24.3
Bacillaceae	Bacteria	42.15	38	22.9	5	12	0.3	12.2	24.5	0.7	3.3	0.3	11	14.6
Chromatiales	Bacteria	62.15	21.5	36.6	8.1	7.9	0.1	24.2	32.2	2	0.6	0.1	9	9.7
Comamonadaceae	Bacteria	65.3813	15.1	42.7	8.8	2.7	1.3	27.4	31.4	0.1	0.9	0.1	9.8	10.8
Cytophagales	Bacteria	40.6	20.5882	39.7059	4.41176	1.47059	0	20.5882	22.0588	1.47059	1.47059	0	16.1765	17.6471
Enterobacteriaceae	Bacteria	52.1753	22.5	49.7	4.7	3	0.8	11.8	15.6	0.1	1.7	0.3	10.2	12.2
Lactobacillales	Bacteria	37.7	22.3684	20.8502	8.90688	7.59109	2.83401	17.2065	27.6316	4.25101	8.09717	0.303644	20.749	29.1498
Micrococcineae	Bacteria	69.65	17.8	18.2	34.3	3.3	0.5	47.3	51.1	0.5	5.3	0.2	7.4	12.9
Oceanospirillales	Bacteria	54.4	21	30.5	1.3	3.2	0.3	18.7	22.2	0.9	3.7	0.4	22.2	26.3
Rhodospirillales	Bacteria	65.0329	23.8	22.3	20	3.4	0.4	38.4	42.2	2	3.3	0.1	8.3	11.7
Selenomonadales	Bacteria	48.9	11.3	29.9	8.8	11.5	2.7	21	35.2	0.6	6.6	0.4	16.6	23.6
Xanthomonadacae	Bacteria	66.025	21.8	35.6	5.9	2.6	0.5	26.6	29.7	0.7	1.4	0.1	11.4	12.9
Euk_Coelomata	Euk	40.7158	49.3	23.4	0.3	3.1	0.8	7.4	11.3	1	6	1.9	8.1	16
Euk_Pezizomycotina	Euk	48.9	21.6	49.6	1.6	6.1	7.5	4.4	18	0.6	3.9	0.9	6	10.8
		min =	5.78125	9.0625				min =	11.3				min =	9.7
		max =	49.3	49.7				max =	63.9062				max =	29.1498
