# Supplementary material for: The Structure of Evolutionary Model Space for Proteins Across the Tree of Life
Source: Preprints.org preprint supplement (doi:10.20944/preprints202212.0403.v1), 2022-12-21
Supplement: Supplementary file 4 [file Scolaro_Braun_Supplementary_File_S3.xlsx]

## Sheet: 1. RE values
#	Exchange	Min subs	NM_DPANN	NM Thermoprotei	NM Thaumarchaeota	NM Methanomicrobia	NM Halobacteriaceae		Mean Archaea	Mean All		Mean excluding Thermoprotei	Thermoprotei minus others		Mean excluding Halobacteriaceae	Halobacteriaceae minus others		Mean excluding Methanomicrobia	Methanomicrobia minus others		Thermoprotei minus MEANALL	Halobacteriaceae minus MEANALL	Methanomicrobia minus MEANALL
168	P<->Y	2	0.00068102	0.000640529	0.000445636	0.000449507	0.000279347		0.000499208	0.000352714		0.000463877	0.000176652		0.0272506	-0.0269712		0.000511633	-6.2126e-05		0.000287815	-7.33673e-05	9.67927e-05
182	L<->V	1	0.00751197	0.00650454	0.00661529	0.00620177	0.0104634		0.0074594	0.00862862		0.00769812	-0.00119358		0.0319321	-0.0214687		0.00777381	-0.00157204		-0.00212409	0.00183481	-0.00242685
163	I<->Y	2	0.000814	0.00120602	0.000887699	0.000462467	0.00052485		0.000779007	0.000657316		0.000672254	0.000533765		0.0194955	-0.0189707		0.000858142	-0.000395675		0.000548703	-0.000132466	-0.000194849
137	A<->W	2	0.000711	0.000761794	0.00123267	0.000725	0.00115		0.000916092	0.000935239		0.000954667	-0.000192873		0.0161447	-0.0149947		0.000963865	-0.000238865		-0.000173445	0.000214761	-0.000210239
78	K<->M	1	0.00311	0.00318654	0.00278	0.00385687	0.00619		0.00382468	0.00294364		0.00398422	-0.000797676		0.0186309	-0.0124409		0.00381664	4.02347e-05		0.000242901	0.00324636	0.00091323
20	C<->E	3	1.09e-05	8.68e-07	2.21e-05	4.45e-06	1.06e-05		9.7836e-06	6.27372e-06		1.20125e-05	-1.11445e-05		0.0119523	-0.0119417		1.1117e-05	-6.667e-06		-5.40572e-06	4.32628e-06	-1.82372e-06
7	A<->C	2	0.0208	0.0117957	0.0104831	0.0141251	0.00938		0.0133168	0.0128813		0.013697	-0.00190135		0.0208222	-0.0114422		0.0131147	0.00101038		-0.00108561	-0.00350131	0.00124378
35	E<->H	2	0.00143	0.00155457	0.0016179	0.000868	0.00126588		0.00134727	0.00136645		0.00129544	0.000259124		0.0125131	-0.0112472		0.00146709	-0.000599087		0.000188114	-0.000100578	-0.000498455
107	R<->S	1	0.00361	0.00449285	0.0037685	0.00392489	0.00408041		0.00397533	0.00371237		0.00384595	0.000646898		0.0152534	-0.0111729		0.00398794	-6.3053e-05		0.000780477	0.000368041	0.000212516
32	D<->H	1	0.00346	0.00390533	0.00452072	0.00212	0.00210354		0.00322192	0.0034911		0.00305107	0.000854264		0.0131317	-0.0110281		0.0034974	-0.0013774		0.000414227	-0.00138756	-0.0013711
56	A<->K	2	0.00168	0.00166128	0.00182	0.00204	0.00224		0.00188825	0.0024961		0.001945	-0.000283725		0.0129634	-0.0107234		0.00185032	0.000189681		-0.000834825	-0.0002561	-0.0004561
90	K<->F	3	0.00016026	5.03e-05	0.00015	4.75e-05	1.63e-05		8.4872e-05	7.98323e-05		9.3515e-05	-4.3215e-05		0.00852848	-0.00851218		9.4215e-05	-4.6715e-05		-2.95323e-05	-6.35323e-05	-3.23323e-05
173	R<->V	2	0.000869	0.000794688	0.000856308	0.000463	0.000525		0.000701599	0.000675666		0.000678327	0.000116361		0.00785253	-0.00732753		0.000761249	-0.000298249		0.000119022	-0.000150666	-0.000212666
151	P<->W	2	0.0004413	0.00107033	0.000320957	0.000628683	0.00088909		0.000670071	0.000572798		0.000570008	0.000500318		0.0076009	-0.00671181		0.000680418	-5.17352e-05		0.000497528	0.000316292	5.58848e-05
172	A<->V	1	0.0164	0.0152773	0.0156867	0.0124733	0.00991		0.0139494	0.0112249		0.0136175	0.00165984		0.0164084	-0.00649844		0.0143185	-0.00184524		0.00405241	-0.00131491	0.00124834
109	D<->S	2	0.00549	0.00680626	0.00492266	0.00520126	0.00575		0.00563404	0.00529043		0.00534098	0.00146528		0.0119919	-0.00624195		0.00574223	-0.000540967		0.00151583	0.00045957	-8.91675e-05
22	A<->G	1	0.010811	0.0105273	0.0114541	0.0106	0.00900924		0.0104803	0.0098581		0.0104686	5.86803e-05		0.0148037	-0.00579444		0.0104504	0.000149584		0.000669177	-0.000848862	0.0007419
111	Q<->S	2	0.0059	0.0102452	0.00480301	0.00531	0.0044		0.00613165	0.0052101		0.00510325	0.00514197		0.0101199	-0.0057199		0.00633706	-0.00102706		0.00503512	-0.000810103	9.98971e-05
189	W<->V	2	0.00080989	0.000585515	0.000777692	0.000701307	0.00075474		0.000725829	0.000871406		0.000760907	-0.000175392		0.00642387	-0.00566913		0.000731959	-3.06522e-05		-0.000285891	-0.000116666	-0.000170099
59	D<->K	2	0.000975	0.00056729	0.00156842	0.000750023	0.000499		0.000871947	0.000798313		0.000948112	-0.000380821		0.00564071	-0.00514171		0.000902428	-0.000152405		-0.000231023	-0.000299313	-4.82899e-05
73	E<->M	2	0.00105	0.00143542	0.000899271	0.00069501	0.000160567		0.000848053	0.000601007		0.000701212	0.000734205		0.00496907	-0.0048085		0.000886314	-0.000191304		0.00083441	-0.00044044	9.40027e-05
23	R<->G	1	0.00249091	0.00212252	0.00330921	0.00213784	0.00188826		0.00238975	0.00215643		0.00245655	-0.000334036		0.00668161	-0.00479336		0.00245272	-0.000314886		-3.39148e-05	-0.000268177	-1.85948e-05
134	F<->T	2	0.00103111	0.00110197	0.000690432	0.000553168	0.000567		0.000788735	0.000689947		0.000710427	0.000391538		0.00522906	-0.00466206		0.000847627	-0.000294459		0.000412018	-0.000122947	-0.000136779
58	N<->K	1	0.00870863	0.00808385	0.0131725	0.0113	0.0167		0.011593	0.0100512		0.0124703	-0.00438643		0.0211714	-0.00447138		0.0116662	-0.000366239		-0.00196738	0.00664877	0.00124877
159	Q<->Y	2	0.00146	0.0021976	0.000967541	0.000966877	0.00056		0.0012304	0.000797211		0.000988605	0.00120899		0.00501597	-0.00445597		0.00129628	-0.000329407		0.00140039	-0.000237211	0.000169666
14	D<->Q	2	0.00222	0.00175762	0.00230363	0.0013	0.00112		0.00174025	0.00182889		0.00173591	2.17085e-05		0.00502156	-0.00390156		0.00185031	-0.000550313		-7.12748e-05	-0.000708892	-0.000528892
177	Q<->V	2	0.00105	0.000782033	0.000772091	0.000718	0.000395		0.000743425	0.000802797		0.000733773	4.82603e-05		0.00420841	-0.00381341		0.000749781	-3.1781e-05		-2.07636e-05	-0.000407797	-8.47966e-05
114	H<->S	2	0.00479696	0.00663546	0.00400354	0.00445	0.00331		0.00463919	0.0044072		0.00414012	0.00249533		0.00706661	-0.00375661		0.00468649	-0.000236489		0.00222826	-0.0010972	4.28045e-05
63	G<->K	2	0.00180394	0.0019058	0.00187937	0.00195857	0.000874313		0.0016844	0.00156306		0.00162905	0.000276755		0.00457903	-0.00370472		0.00161586	0.000342716		0.000342743	-0.000688749	0.000395512
124	D<->T	2	0.00171802	0.0018662	0.00196003	0.00145256	0.00168251		0.00173587	0.00173491		0.00170328	0.000162925		0.00512539	-0.00344287		0.00180669	-0.000354137		0.000131292	-5.23993e-05	-0.000282357
122	R<->T	1	0.00256077	0.00257697	0.00250995	0.00281081	0.00424183		0.00294006	0.00271531		0.00303084	-0.000453873		0.00745273	-0.0032109		0.00297238	-0.000161564		-0.000138341	0.00152652	9.55061e-05
183	K<->V	2	0.000815	0.000955419	0.00085526	0.000529	0.00063889		0.000758714	0.000753309		0.000709537	0.000245882		0.00374853	-0.00310964		0.000816142	-0.000287142		0.00020211	-0.000114419	-0.000224309
68	R<->M	1	0.00352238	0.00272391	0.00311471	0.00278991	0.00140528		0.00271124	0.00196201		0.00270807	1.5846e-05		0.00416967	-0.00276439		0.00269157	9.83385e-05		0.000761905	-0.000556728	0.000827899
142	Q<->W	2	0.00106663	0.00283773	0.000856558	0.00182551	0.000969411		0.00151117	0.000895971		0.00117953	0.0016582		0.00358265	-0.00261324		0.00143258	0.000392926		0.00194176	7.34398e-05	0.000929537
115	I<->S	1	0.00026722	4.13e-05	0.000369	7.8e-05	7.7e-05		0.000166504	0.000145479		0.000197805	-0.000156505		0.00258018	-0.00250318		0.00018863	-0.00011063		-0.000104179	-6.84794e-05	-6.74794e-05
84	Q<->F	3	0.000246	0.000130471	0.000193595	0.000106	0.000191		0.000173413	0.000129466		0.000184149	-5.36777e-05		0.00260589	-0.00241489		0.000190267	-8.42665e-05		1.00541e-06	6.15344e-05	-2.34656e-05
98	E<->P	2	0.00189524	0.00192053	0.00236435	0.00189686	0.00113841		0.00184308	0.00187454		0.00182372	9.68175e-05		0.00355319	-0.00241478		0.00182963	6.7225e-05		4.59894e-05	-0.000736132	2.23154e-05
139	N<->W	3	0.000218	0.000683674	0.000495	0.000381	4.53e-05		0.000364595	0.000214528		0.000284825	0.000398849		0.00229242	-0.00224712		0.000360494	2.05065e-05		0.000469146	-0.000169228	0.000166472
131	L<->T	2	0.00165	0.0022751	0.00136217	0.00117699	0.000987518		0.00149036	0.00131368		0.00129417	0.000980929		0.00319301	-0.00220549		0.0015687	-0.000391709		0.000961417	-0.000326164	-0.000136693
112	E<->S	2	0.00277	0.00436325	0.00276113	0.00247682	0.00263		0.00300024	0.00229906		0.00265949	0.00170376		0.00482868	-0.00219868		0.00313109	-0.000654278		0.00206418	0.000330935	0.000177752
93	R<->P	1	0.0013468	0.00125709	0.00172073	0.00132467	0.00145238		0.00142033	0.00135157		0.00146114	-0.00020405		0.00360688	-0.0021545		0.00144425	-0.000119583		-9.44753e-05	0.000100813	-2.69013e-05
92	A<->P	1	0.00636337	0.00433238	0.00683	0.00568	0.00511463		0.00566408	0.00623096		0.005997	-0.00166462		0.00695014	-0.00183551		0.0056601	1.9905e-05		-0.00189858	-0.00111633	-0.000550959
101	I<->P	2	0.00039322	0.000310556	0.000486381	0.00014737	0.000106196		0.000288745	0.00021564		0.000283292	2.72643e-05		0.00190476	-0.00179857		0.000324088	-0.000176718		9.49158e-05	-0.000109444	-6.82702e-05
26	C<->G	1	0.00341434	0.00364001	0.00466	0.0041942	0.00310025		0.00380176	0.00343341		0.0038422	-0.000202187		0.00486816	-0.00176791		0.00370365	0.00049055		0.000206605	-0.000333154	0.000760795
146	I<->W	3	0.00039251	0.000450126	0.000479334	0.000263811	0.000236326		0.000364421	0.000552547		0.000342995	0.000107131		0.00191804	-0.00168172		0.000389574	-0.000125763		-0.000102421	-0.000316221	-0.000288736
52	E<->L	2	0.000382	0.000507466	0.000481829	0.000177	6.03e-05		0.000321719	0.000246205		0.000275282	0.000232184		0.00169858	-0.00163828		0.000357899	-0.000180899		0.000261261	-0.000185905	-6.92053e-05
157	D<->Y	1	0.00067	0.000677474	0.000834571	0.000568	0.000257508		0.000601511	0.000475583		0.00058252	9.49542e-05		0.00176489	-0.00150738		0.000609888	-4.18882e-05		0.000201891	-0.000218075	9.24166e-05
51	Q<->L	1	0.00281099	0.00284867	0.00326069	0.00312	0.00145405		0.00269888	0.00271088		0.00266143	0.00018724		0.00281126	-0.00135721		0.0025936	0.0005264		0.000137793	-0.00125683	0.000409121
79	A<->F	2	0.00138	0.00162142	0.000927447	0.00109	0.000906		0.00118497	0.00103924		0.00107586	0.00054556		0.00224404	-0.00133804		0.00120872	-0.000118717		0.000582185	-0.000133237	5.07632e-05
148	K<->W	2	0.00021207	0.000294718	0.000439505	0.000191301	0.000417498		0.000311018	0.000223381		0.000315093	-2.03755e-05		0.0017137	-0.0012962		0.000340948	-0.000149647		7.13372e-05	0.000194117	-3.20798e-05
62	E<->K	1	0.00658155	0.00629278	0.00997059	0.00623965	0.00907817		0.00763255	0.00540314		0.00796749	-0.00167471		0.0103671	-0.00128898		0.00798077	-0.00174112		0.000889641	0.00367503	0.000836511
65	I<->K	1	0.00070639	0.0005533	0.000902184	0.000441979	0.000484052		0.000617581	0.000475005		0.000633651	-8.03513e-05		0.00171409	-0.00123004		0.000661481	-0.000219502		7.82949e-05	9.0469e-06	-3.30261e-05
10	D<->C	2	0.000417	0.00171	0.000406875	0.000132107	0.000113		0.000555796	0.000313483		0.000267246	0.00144275		0.00130202	-0.00118902		0.000661719	-0.000529612		0.00139652	-0.000200483	-0.000181376
37	A<->I	2	0.000745	0.000354968	0.000679287	0.000165142	6.9e-05		0.000402679	0.000307223		0.000414607	-5.96393e-05		0.00113892	-0.00106992		0.000462064	-0.000296922		4.77448e-05	-0.000238223	-0.000142081
186	P<->V	2	0.00157329	0.00197784	0.00152752	0.00105628	0.00102898		0.00143278	0.00124472		0.00129652	0.000681324		0.00206022	-0.00103124		0.00152691	-0.000470623		0.000733124	-0.000215738	-0.000188433
170	T<->Y	2	0.00117	0.002071	0.000931105	0.000701555	0.000628815		0.0011005	0.000873556		0.000857869	0.00121313		0.0016376	-0.00100878		0.00120023	-0.000498676		0.00119745	-0.000244741	-0.000172001
130	I<->T	1	0.00604429	0.00249	0.00660074	0.00394479	0.0025		0.00431596	0.00395206		0.00477245	-0.00228245		0.00345746	-0.000957463		0.00440876	-0.00046397		-0.00146206	-0.00145206	-7.27164e-06
143	E<->W	2	0.000393	0.00092033	0.000761639	0.000291771	0.000165682		0.000506484	0.00028568		0.000403023	0.000517307		0.00111915	-0.000953464		0.000560163	-0.000268392		0.00063465	-0.000119998	6.09051e-06
118	M<->S	2	0.00206592	0.00252047	0.00141785	0.00129988	0.00181739		0.0018243	0.00194736		0.00165026	0.000870208		0.00272482	-0.000907429		0.00195541	-0.00065553		0.000573105	-0.00012997	-0.000647485
187	S<->V	2	0.00055579	0.000138306	0.000506252	9.23e-05	3.04e-05		0.00026461	0.000224062		0.000296186	-0.00015788		0.000928448	-0.000898048		0.000307687	-0.000215387		-8.57563e-05	-0.000193662	-0.000131762
103	K<->P	2	0.00182664	0.00204492	0.00217969	0.00150193	0.000873666		0.00168537	0.00175636		0.00159548	0.000449437		0.00173588	-0.000862211		0.00173123	-0.000229302		0.00028856	-0.000882693	-0.000254431
160	E<->Y	2	0.00052237	0.000775569	0.000519963	0.000233	0.000128549		0.00043589	0.000294364		0.00035097	0.000424599		0.000955365	-0.000826816		0.000486613	-0.000253613		0.000481205	-0.000165815	-6.13636e-05
119	F<->S	1	0.00237512	0.000970082	0.00238679	0.00178237	0.00103752		0.00171037	0.00134814		0.00189545	-0.000925366		0.00185231	-0.000814793		0.00169238	8.9993e-05		-0.000378055	-0.000310621	0.000434232
48	N<->L	2	0.000409	0.000497393	0.0004339	0.00021	0.000185		0.000347059	0.000296046		0.000309475	0.000187918		0.000978034	-0.000793034		0.000381323	-0.000171323		0.000201347	-0.000111046	-8.60457e-05
94	N<->P	2	0.00077764	0.00132965	0.000809836	0.000301306	0.000339703		0.000711628	0.000652248		0.000557121	0.000772532		0.00110847	-0.000768763		0.000814208	-0.000512902		0.000677405	-0.000312545	-0.000350942
69	N<->M	2	0.00172991	0.0022374	0.00181403	0.0012664	0.00166075		0.0017417	0.00185356		0.00161777	0.000619633		0.00239983	-0.000739083		0.00186052	-0.000594127		0.000383843	-0.000192813	-0.000587165
128	G<->T	2	0.000605	0.000403767	0.000562873	0.000248064	0.000738398		0.00051162	0.000578572		0.000538584	-0.000134817		0.00147251	-0.000734116		0.000577509	-0.000329445		-0.000174805	0.000159826	-0.000330508
70	D<->M	3	0.000139	0.000221559	0.000275308	0.000232478	0.000285602		0.000230789	0.000191106		0.000233097	-1.1538e-05		0.000989511	-0.000703909		0.000230367	2.11075e-06		3.04532e-05	9.44962e-05	4.13722e-05
126	Q<->T	2	0.00442836	0.00550183	0.0044431	0.00410967	0.00477782		0.00465216	0.00459895		0.00443974	0.00106209		0.00543229	-0.000654465		0.00478778	-0.000678107		0.000902883	0.000178875	-0.000489277
178	E<->V	1	0.00115953	0.00119662	0.0013842	0.000765105	0.000359296		0.000972951	0.000965508		0.000917033	0.000279592		0.000978448	-0.000619152		0.00102491	-0.000259808		0.000231117	-0.000606212	-0.000200403
80	R<->F	2	0.000372	9.01e-05	0.000499	8.44e-05	0.000159		0.0002409	0.000206614		0.0002786	-0.0001885		0.000758046	-0.000599046		0.000280025	-0.000195625		-0.000116514	-4.76142e-05	-0.000122214
165	K<->Y	2	0.00049389	0.000652	0.000488774	0.000244116	0.000424		0.000460556	0.000314298		0.000412695	0.000239305		0.000993428	-0.000569428		0.000514666	-0.00027055		0.000337702	0.000109702	-7.01816e-05
99	G<->P	2	0.00079925	0.00140053	0.00103795	0.00100988	0.000984565		0.00104644	0.00107301		0.000957912	0.000442619		0.00154057	-0.00055601		0.00105558	-4.5693e-05		0.000327517	-8.84498e-05	-6.31328e-05
13	N<->Q	2	0.0072	0.0115447	0.00681722	0.00702929	0.00923		0.00836424	0.00776927		0.00756913	0.00397557		0.00974556	-0.000515559		0.00869798	-0.00166868		0.00377543	0.00146073	-0.000739974
96	C<->P	2	0.00054053	0.00125013	0.000339	0.000406967	0.000761308		0.000659586	0.000328921		0.000511951	0.000738175		0.00126381	-0.000502501		0.000722741	-0.000315774		0.000921205	0.000432387	7.80464e-05
153	T<->W	2	0.000674	0.000690339	0.000988508	0.000813022	0.000626362		0.000758446	0.000706561		0.000775473	-8.5134e-05		0.00111049	-0.000484132		0.000744802	6.82198e-05		-1.6222e-05	-8.0199e-05	0.000106461
104	M<->P	2	0.00063425	0.00106539	0.000556628	0.000768634	0.000885752		0.000782131	0.000760862		0.000711316	0.000354074		0.00132226	-0.000436508		0.000785505	-1.6871e-05		0.000304528	0.00012489	7.77156e-06
42	Q<->I	2	0.000413	0.000301747	0.00031967	0.000184	0.000172		0.000278083	0.00020816		0.000272167	2.95795e-05		0.000606724	-0.000434724		0.000301604	-0.000117604		9.35871e-05	-3.61599e-05	-2.41599e-05
27	Q<->G	2	0.00163542	0.00141051	0.0012435	0.00180572	0.00234655		0.00168834	0.00163948		0.0017578	-0.000347294		0.00275046	-0.00040391		0.001659	0.000146726		-0.000228973	0.000707074	0.000166243
127	E<->T	2	0.00247937	0.00210917	0.00289546	0.00247641	0.00317706		0.00262749	0.00271698		0.00275708	-0.000647909		0.00355542	-0.000378357		0.00266526	-0.000188853		-0.000607814	0.000460083	-0.000240569
105	F<->P	2	0.00060164	0.000964007	0.00062783	0.000365952	0.000327359		0.000577358	0.000426238		0.000480695	0.000483312		0.000698041	-0.000370682		0.000630209	-0.000264257		0.000537769	-9.88793e-05	-6.02863e-05
38	R<->I	1	0.000705	0.000377122	0.000792296	0.00033	0.000159		0.000472684	0.000380328		0.000496574	-0.000119452		0.000518602	-0.000359602		0.000508354	-0.000178354		-3.20601e-06	-0.000221328	-5.0328e-05
17	R<->E	2	0.00109	0.00186506	0.00131609	0.000823	0.00216		0.00145083	0.00102399		0.00134727	0.000517791		0.00251262	-0.000352624		0.00160779	-0.000784788		0.000841074	0.00113601	-0.000200989
161	G<->Y	2	0.00031838	0.000405877	0.000401	8.56e-05	7.11e-05		0.000256391	0.000235759		0.00021902	0.000186857		0.00040772	-0.00033662		0.000299089	-0.000213489		0.000170118	-0.000164659	-0.000150159
40	D<->I	2	4.16e-05	1.58e-05	0.000166	2.08e-05	2.55e-05		5.394e-05	4.3648e-05		6.3475e-05	-4.7675e-05		0.0003584	-0.0003329		6.2225e-05	-4.1425e-05		-2.7848e-05	-1.8148e-05	-2.2848e-05
116	L<->S	1	0.00116199	0.000392793	0.00173055	0.000433147	0.00024671		0.000793039	0.000595097		0.0008931	-0.000500307		0.000559251	-0.000312541		0.000883012	-0.000449865		-0.000202304	-0.000348387	-0.00016195
156	N<->Y	1	0.00281	0.00263286	0.00324444	0.00268174	0.0017993		0.00263367	0.002137		0.00263387	-1.0065e-06		0.00210341	-0.000304115		0.00262165	6.00935e-05		0.00049586	-0.000337704	0.00054474
174	N<->V	2	0.00034838	0.000296542	0.000335	0.000104	0.000205		0.000257784	0.000338486		0.000248095	4.8447e-05		0.000508365	-0.000303365		0.000296231	-0.000192231		-4.19436e-05	-0.000133486	-0.000234486
25	D<->G	1	0.00481568	0.00481621	0.006906	0.00649882	0.00737331		0.006082	0.00567692		0.00639845	-0.00158224		0.00767378	-0.000300467		0.0059778	0.000521016		-0.000860708	0.00169639	0.000821896
179	G<->V	1	0.000298	4.57e-05	0.000749	9.41e-05	0.000414		0.00032016	0.000322811		0.000388775	-0.000343075		0.000711532	-0.000297532		0.000376675	-0.000282575		-0.000277111	9.11889e-05	-0.000228711
185	F<->V	1	0.00299	0.00262298	0.00223	0.00250381	0.00417		0.00290336	0.00283402		0.00297345	-0.00035047		0.00445764	-0.000287637		0.00300325	-0.000499437		-0.00021104	0.00133598	-0.000330214
144	G<->W	1	0.00219483	0.00194425	0.00316721	0.00211837	0.00118878		0.00212269	0.00178023		0.0021673	-0.000223047		0.00147392	-0.000285147		0.00212377	-5.4e-06		0.000164019	-0.000591452	0.000338137
140	D<->W	3	0.00024673	0.000372222	0.000515058	4.66e-05	9.24e-05		0.000254602	0.000148683		0.000225197	0.000147025		0.000369786	-0.000277386		0.000306603	-0.000260003		0.000223539	-5.62828e-05	-0.000102083
5	R<->D	2	0.000438	0.000326413	0.000555321	0.000176855	0.000436851		0.000386688	0.000326429		0.000401757	-7.53438e-05		0.00070937	-0.000272519		0.000439146	-0.000262291		-1.58146e-08	0.000110422	-0.000149574
64	H<->K	2	0.00264532	0.00238845	0.0032839	0.00279121	0.00206353		0.00263448	0.00285739		0.00269599	-0.000307538		0.00233207	-0.00026854		0.0025953	0.00019591		-0.000468939	-0.00079386	-6.6181e-05
29	A<->H	2	0.001608	0.00149211	0.00144505	0.000789148	0.00159511		0.00138588	0.00155096		0.00135933	0.000132787		0.00185334	-0.000258233		0.00153507	-0.000745919		-5.88445e-05	4.41495e-05	-0.000761809
28	E<->G	1	0.00204	0.00168404	0.0032857	0.00248267	0.00169932		0.00223835	0.00175867		0.00237692	-0.00069288		0.00194845	-0.000249123		0.00217727	0.000305402		-7.46327e-05	-5.93527e-05	0.000723993
81	N<->F	2	0.000439	0.000401337	0.000602	0.00017	8.79e-05		0.000340047	0.000382903		0.000324725	7.6612e-05		0.00033223	-0.00024433		0.000382559	-0.000212559		1.84335e-05	-0.000295003	-0.000212903
43	E<->I	2	0.000276	0.000157405	0.000267	6.18e-05	1.3e-05		0.000155041	0.000111912		0.00015445	2.955e-06		0.000247578	-0.000234578		0.000178351	-0.000116551		4.54926e-05	-9.89124e-05	-5.01124e-05
100	H<->P	1	0.00337	0.00215104	0.00564794	0.00273159	0.00203447		0.00318701	0.00227405		0.003446	-0.00129496		0.00226852	-0.000234051		0.00330086	-0.00056927		-0.000123006	-0.000239573	0.000457548
49	D<->L	2	9.35e-05	7.08e-05	0.000239	1.65e-05	2.13e-05		8.822e-05	6.39014e-05		9.2575e-05	-2.1775e-05		0.000246262	-0.000224962		0.00010615	-8.965e-05		6.89862e-06	-4.26014e-05	-4.74014e-05
154	A<->Y	2	0.00128025	0.00189837	0.000993826	0.000729829	0.000791694		0.00113879	0.000806027		0.0009489	0.000949467		0.00100852	-0.000216824		0.00124103	-0.000511205		0.00109234	-1.43334e-05	-7.61984e-05
41	C<->I	2	0.00119	0.000233983	0.00132239	0.000889	0.000274		0.000781875	0.00113493		0.000918848	-0.000684865		0.000484947	-0.000210947		0.000755094	0.000133906		-0.000900946	-0.000860929	-0.000245929
9	N<->C	2	0.0017	0.00143668	0.00195349	0.00266	0.00203		0.00195604	0.00219911		0.00208587	-0.000649193		0.00223984	-0.000209838		0.00178004	0.000879956		-0.000762431	-0.000169112	0.000460888
8	R<->C	1	0.00162	0.00112326	0.0039634	0.00346187	0.0082124		0.00367618	0.00457285		0.00431442	-0.00319116		0.00842155	-0.000209153		0.00372976	-0.000267894		-0.00344959	0.00363955	-0.00111098
75	H<->M	3	0.00178	0.00328	0.00219635	0.0013513	0.00135		0.00199153	0.0015834		0.00166941	0.00161059		0.00155468	-0.000204685		0.00215159	-0.000800292		0.0016966	-0.000233398	-0.000232102
74	G<->M	2	0.00103195	0.000921	0.00104188	0.000835	0.000798		0.000925566	0.000852105		0.000926707	-5.707e-06		0.000988691	-0.000190691		0.000948207	-0.000113207		6.88945e-05	-5.41055e-05	-1.71055e-05
82	D<->F	2	0.000122	0.00017487	0.00014661	2.01e-05	9.16e-05		0.000111036	9.69463e-05		9.50775e-05	7.97925e-05		0.00025949	-0.00016789		0.00013377	-0.00011367		7.79237e-05	-5.34627e-06	-7.68463e-05
175	D<->V	1	0.000143	7.91e-05	0.000332	5.3e-05	5.48e-05		0.00013238	0.000117267		0.0001457	-6.66e-05		0.000211378	-0.000156578		0.000152225	-9.9225e-05		-3.81666e-05	-6.24666e-05	-6.42666e-05
36	G<->H	2	0.00187	0.00183693	0.00143	0.00203	0.00143		0.00171939	0.0018893		0.00169	0.000146929		0.00157967	-0.000149675		0.00164173	0.000388268		-5.23751e-05	-0.000459304	0.000140696
164	L<->Y	2	0.00126	0.00268736	0.00134	0.000781282	0.00103816		0.00142136	0.00113365		0.00110486	0.0015825		0.00117985	-0.000141696		0.00158138	-0.000800097		0.00155371	-9.54907e-05	-0.000352366
39	N<->I	1	0.000718	0.000468	0.00092	0.000517	0.000479		0.0006204	0.000620832		0.0006585	-0.0001905		0.000603427	-0.000124427		0.00064625	-0.00012925		-0.000152832	-0.000141832	-0.000103832
85	E<->F	3	0.000166	0.000161065	0.000174835	2.1e-05	4.98e-05		0.00011454	7.74159e-05		0.000102909	5.81562e-05		0.000149871	-0.000100071		0.000137925	-0.000116925		8.36491e-05	-2.76159e-05	-5.64159e-05
66	L<->K	2	0.00068135	0.000788923	0.000796057	0.00040399	0.000573812		0.000648826	0.000623869		0.000613802	0.000175121		0.000659272	-8.54596e-05		0.000710035	-0.000306045		0.000165054	-5.00567e-05	-0.000219879
155	R<->Y	2	0.00165475	0.00156	0.00137834	0.000865182	0.00123		0.00133765	0.00110573		0.00128207	0.000277932		0.00129507	-6.50681e-05		0.00145577	-0.000590591		0.000454266	0.000124266	-0.000240552
53	G<->L	2	0.000248	0.000170897	0.000371976	0.000118971	0.000264342		0.000234837	0.000276748		0.000250822	-7.99253e-05		0.000307267	-4.29254e-05		0.000263804	-0.000144833		-0.000105851	-1.24062e-05	-0.000157777
72	Q<->M	2	0.0101	0.0117	0.00559508	0.00827778	0.00607		0.00834857	0.00637389		0.00751071	0.00418929		0.00611222	-4.2217e-05		0.00836627	-8.84907e-05		0.00532611	-0.000303891	0.00190389
44	G<->I	2	4.52e-05	6.29e-06	8.41e-05	7.87e-06	7.11e-05		4.2912e-05	4.98397e-05		5.20675e-05	-4.57775e-05		0.000113208	-4.21081e-05		5.16725e-05	-4.38025e-05		-4.35497e-05	2.12603e-05	-4.19697e-05
71	C<->M	3	0.00423745	0.00161944	0.00434921	0.00301878	0.00172495		0.00298997	0.00387638		0.0033326	-0.00171315		0.00176165	-3.67049e-05		0.00298276	3.60197e-05		-0.00225694	-0.00215144	-0.000857603
145	H<->W	3	0.00378683	0.00559118	0.00152742	0.00285312	0.00292		0.00333571	0.00286023		0.00277184	0.00281934		0.0028979	2.2099e-05		0.00345636	-0.000603235		0.00273094	5.97657e-05	-7.11131e-06
190	Y<->V	2	0.00099375	0.00183841	0.000790886	0.000486856	0.000904661		0.00100291	0.000887107		0.000794038	0.00104437		0.000873038	3.16229e-05		0.00113193	-0.000645071		0.000951302	1.75536e-05	-0.000400251
67	A<->M	2	0.00612295	0.00756985	0.00391037	0.00360328	0.00303289		0.00484787	0.00396803		0.00416737	0.00340248		0.0029846	4.82969e-05		0.00515902	-0.00155574		0.00360182	-0.000935136	-0.000364749
46	A<->L	2	0.00188	0.0023615	0.00175	0.00106	0.00112		0.0016343	0.0014937		0.0014525	0.000908996		0.00107168	4.83153e-05		0.00177787	-0.000717874		0.000867797	-0.000373699	-0.000433699
97	Q<->P	1	0.00369796	0.00655939	0.00603523	0.00405597	0.0029223		0.00465417	0.00296617		0.00417787	0.00238153		0.00286065	6.16568e-05		0.00480372	-0.000747752		0.00359322	-4.387e-05	0.0010898
45	H<->I	2	0.000402	0.000619282	0.000404	9.67e-05	0.000289		0.000362196	0.000336444		0.000297925	0.000321357		0.00020818	8.08197e-05		0.000428571	-0.000331871		0.000282838	-4.74439e-05	-0.000239744
4	A<->D	1	0.00106	0.000453529	0.00177991	0.000884931	0.0024025		0.00131617	0.00179134		0.00153183	-0.00107831		0.00231997	8.2531e-05		0.00142398	-0.000539053		-0.00133782	0.000611153	-0.000906414
18	N<->E	2	0.00238	0.00301683	0.00272232	0.00157	0.00194		0.00232583	0.00163687		0.00215308	0.000863752		0.00184791	9.2087e-05		0.00251479	-0.000944788		0.00137996	0.000303131	-6.6869e-05
2	A<->N	2	0.00081419	0.000736123	0.000835679	0.00050091	0.00121608		0.000820597	0.00102775		0.000841716	-0.000105593		0.00110233	0.000113755		0.000900519	-0.000399609		-0.00029163	0.000188331	-0.000526843
87	H<->F	2	0.00439	0.00233296	0.00441268	0.00150402	0.00197		0.00292193	0.00332344		0.00306917	-0.000736218		0.00184271	0.000127293		0.00327641	-0.00177239		-0.000990481	-0.00135344	-0.00181942
152	S<->W	1	0.00133342	0.0015726	0.00116803	0.00164402	0.00119166		0.00138195	0.00122634		0.00133428	0.000238321		0.00102242	0.000169242		0.00131643	0.00032759		0.000346265	-3.46799e-05	0.00041768
60	C<->K	3	3.08e-05	0.000156107	0.000250021	3.55e-05	0.000733725		0.000241231	0.000105149		0.000262512	-0.000106405		0.000541645	0.00019208		0.000292663	-0.000257163		5.09583e-05	0.000628576	-6.96487e-05
166	M<->Y	3	0.00183363	0.00328827	0.00252943	0.00101418	0.00151332		0.00203576	0.00157967		0.00172264	0.00156564		0.00131804	0.000195282		0.00229116	-0.00127699		0.0017086	-6.63524e-05	-0.000565494
15	C<->Q	3	0.000349	8.31e-06	0.000792	0.000487	0.00135		0.000597262	0.000375251		0.0007445	-0.00073619		0.0011522	0.000197805		0.000624828	-0.000137828		-0.000366941	0.000974749	0.000111749
24	N<->G	2	0.00860317	0.0137192	0.00706285	0.00896828	0.00627293		0.00892529	0.00898334		0.00772681	0.00599243		0.00605175	0.00022118		0.00891455	5.3733e-05		0.0047359	-0.00271041	-1.50592e-05
180	H<->V	2	0.00047956	0.000445671	0.000439991	0.000365684	0.000588722		0.000463926	0.000583683		0.000468489	-2.28182e-05		0.000364713	0.000224009		0.000488486	-0.000122802		-0.000138012	5.03922e-06	-0.000217999
95	D<->P	2	0.00171	0.00199831	0.00219612	0.00166942	0.00159451		0.00183367	0.00190286		0.00179251	0.000205794		0.00134904	0.000245473		0.00187473	-0.000205307		9.5447e-05	-0.000308351	-0.000233434
47	R<->L	1	0.00152	0.00125127	0.00176271	0.00174	0.00192		0.0016388	0.00173043		0.00173568	-0.000484408		0.00166568	0.000254315		0.0016135	0.000126504		-0.000479157	0.000189573	9.57289e-06
86	G<->F	2	0.00064	0.000512	0.000575	0.000375	0.000599		0.0005402	0.000647927		0.00054725	-3.525e-05		0.000328112	0.000270888		0.0005815	-0.0002065		-0.000135927	-4.89267e-05	-0.000272927
102	L<->P	1	0.00143645	0.00136266	0.00233471	0.00120002	0.00123632		0.00151403	0.0011853		0.00155187	-0.000189217		0.00095892	0.000277405		0.00159254	-0.000392519		0.000177362	5.10285e-05	1.47195e-05
11	A<->Q	2	0.00385	0.00454432	0.00301327	0.00347	0.0025883		0.00349318	0.00431721		0.00323039	0.00131393		0.00219295	0.000395352		0.00349897	-2.89717e-05		0.00022711	-0.00172892	-0.000847214
169	S<->Y	1	0.00215	0.00149801	0.00239868	0.00218041	0.00173		0.00199142	0.00145743		0.00211477	-0.000616765		0.00130547	0.000424526		0.00194417	0.000236238		4.05755e-05	0.000272568	0.000722978
1	A<->R	2	0.00133355	0.00139938	0.00144387	0.00175493	0.00204563		0.00159547	0.00175305		0.0016445	-0.000245119		0.00148293	0.000562701		0.00155561	0.000199326		-0.000353672	0.000292584	1.8839e-06
88	I<->F	1	0.00565	0.00531396	0.00456106	0.00528	0.00479		0.005119	0.00520646		0.00507026	0.000243695		0.00418058	0.000609416		0.00507875	0.000201246		0.000107496	-0.000416463	7.35375e-05
135	P<->T	1	0.00259	0.00348153	0.00392082	0.00249	0.00261		0.00301847	0.00271479		0.0029027	0.000578823		0.00198238	0.000627623		0.00315059	-0.000660586		0.000766738	-0.000104789	-0.000224789
54	H<->L	1	0.00171	0.0022051	0.00195572	0.00165464	0.00172		0.00184909	0.00174619		0.00176009	0.000445014		0.00105441	0.000665587		0.00189771	-0.000243065		0.000458915	-2.61894e-05	-9.15484e-05
117	K<->S	2	0.00312177	0.00447624	0.00344645	0.00345	0.00297865		0.00349462	0.00312809		0.00324922	0.00122703		0.00227662	0.000702029		0.00350578	-5.57778e-05		0.00134815	-0.000149442	0.000321911
129	H<->T	2	0.00210447	0.00240334	0.00209166	0.00198041	0.00221634		0.00215925	0.00236939		0.00209822	0.000305123		0.00129995	0.000916394		0.00220396	-0.000223545		3.395e-05	-0.000153052	-0.000388984
149	M<->W	2	0.00386973	0.00515206	0.0036787	0.00316184	0.00306681		0.00378583	0.00404969		0.00344427	0.00170779		0.00212499	0.00094182		0.00394182	-0.000779983		0.00110237	-0.00098288	-0.000887849
188	T<->V	2	0.0140186	0.014223	0.00988935	0.0103856	0.00718825		0.011141	0.0105447		0.0103705	0.00385257		0.00622615	0.000962093		0.0113298	-0.000944202		0.00367827	-0.0033565	-0.00015914
110	C<->S	1	0.0148	0.00837499	0.0130943	0.0184317	0.0108395		0.0131081	0.0160611		0.0142914	-0.00591639		0.00964014	0.00119936		0.0117772	0.00665452		-0.00768612	-0.00522161	0.00237061
125	C<->T	2	0.007711	0.00537114	0.00436262	0.00753059	0.00554751		0.00610457	0.00770448		0.00628793	-0.000916788		0.00399652	0.00155099		0.00574807	0.00178252		-0.00233334	-0.00215697	-0.00017389
147	L<->W	1	0.00309159	0.00269962	0.00358081	0.0032	0.00342277		0.00319896	0.0046577		0.00332379	-0.000624173		0.00176972	0.00165305		0.0031987	1.302e-06		-0.00195808	-0.00123493	-0.0014577
3	R<->N	2	0.00337908	0.00450301	0.0031637	0.00333557	0.00385324		0.00364692	0.00330952		0.0034329	0.00107012		0.00215853	0.0016947		0.00372476	-0.000389187		0.0011935	0.00054372	2.60546e-05
121	A<->T	1	0.0115888	0.0128987	0.0148	0.00987576	0.0117811		0.0121889	0.00993984		0.0120114	0.000887319		0.0100688	0.00171231		0.0127672	-0.00289141		0.0029589	0.00184128	-6.40766e-05
91	M<->F	2	0.00883668	0.0105718	0.00647182	0.00651503	0.00595498		0.00767007	0.00814539		0.00694463	0.0036272		0.00410043	0.00185455		0.00795883	-0.0014438		0.00242644	-0.00219042	-0.00163036
141	C<->W	1	0.00262056	0.00171253	0.00944646	0.00829522	0.0047729		0.00536953	0.00494336		0.00628378	-0.00457126		0.00290692	0.00186598		0.00463811	0.00365711		-0.00323083	-0.000170464	0.00335186
150	F<->W	2	0.0196493	0.014358	0.0100633	0.0142754	0.0112719		0.0139236	0.015831		0.013815	0.000542988		0.00927603	0.00199586		0.0138356	0.000439769		-0.00147309	-0.00455915	-0.00155567
184	M<->V	1	0.00755226	0.00425932	0.00789665	0.00560608	0.0061357		0.00629	0.00744585		0.00679767	-0.00253835		0.00355862	0.00257708		0.00646098	-0.000854903		-0.00318653	-0.00131015	-0.00183977
138	R<->W	1	0.00312	0.00285757	0.00529799	0.00528615	0.00513		0.00433834	0.00320971		0.00470853	-0.00185097		0.00249902	0.00263098		0.00410139	0.00118476		-0.000352142	0.00192029	0.00207644
33	C<->H	2	0.00273733	0.00265	0.00423387	0.00403631	0.00624		0.0039795	0.00381973		0.00431188	-0.00166188		0.00345795	0.00278205		0.0039653	7.10102e-05		-0.00116973	0.00242027	0.000216582
133	M<->T	1	0.0109	0.00936	0.00901783	0.00917798	0.0104		0.00977116	0.00931646		0.00987395	-0.000513953		0.00713058	0.00326942		0.00991946	-0.000741476		4.35368e-05	0.00108354	-0.000138482
19	D<->E	1	0.0217	0.0222804	0.0299	0.0217	0.0166		0.0224361	0.0231631		0.022475	-0.000194637		0.0131587	0.00344131		0.0226201	-0.000920091		-0.000882769	-0.00656313	-0.00146313
77	L<->M	1	0.0353	0.0323725	0.0319416	0.0365	0.0296		0.0331428	0.0369878		0.0333354	-0.000962877		0.0261213	0.00347871		0.0323035	0.00419648		-0.00461532	-0.00738784	-0.000487837
16	A<->E	1	0.00337	0.00243684	0.00426	0.00494	0.00569		0.00413937	0.00527887		0.004565	-0.00212816		0.00208039	0.00360961		0.00393921	0.00100079		-0.00284203	0.000411126	-0.000338874
113	G<->S	1	0.00923	0.0107951	0.00785186	0.00877	0.01		0.00932939	0.00982918		0.00896296	0.00183213		0.00612727	0.00387273		0.00946924	-0.00069924		0.000965919	0.00017082	-0.00105918
158	C<->Y	1	0.00733726	0.00483	0.0091603	0.0132082	0.00864		0.00863516	0.00754909		0.00958645	-0.00475645		0.00466073	0.00397927		0.00749189	0.00571633		-0.00271909	0.00109091	0.00565913
120	P<->S	1	0.00741734	0.0056965	0.0109934	0.00727989	0.00892605		0.00806264	0.00660868		0.00865417	-0.00295767		0.00486269	0.00406336		0.00825832	-0.000978432		-0.000912182	0.00231737	0.000671212
123	N<->T	1	0.0085069	0.00810788	0.00828333	0.00910816	0.00977809		0.00875687	0.0093457		0.00891912	-0.000811238		0.0055581	0.00421999		0.00866905	0.000439111		-0.00123782	0.000432386	-0.000237541
106	A<->S	1	0.0282057	0.0284473	0.0232221	0.0263555	0.0181004		0.0248662	0.0235734		0.0239709	0.00447642		0.0135988	0.00450168		0.0244939	0.00186156		0.00487398	-0.00547294	0.00278209
176	C<->V	2	0.0122124	0.00445662	0.00591495	0.00776118	0.00848098		0.00776523	0.0114405		0.00859238	-0.00413576		0.00386903	0.00461195		0.00776624	-5.061e-06		-0.00698386	-0.00295949	-0.0036793
21	Q<->E	1	0.0169542	0.0204796	0.0208	0.0168032	0.0142042		0.0178482	0.0162627		0.0171904	0.00328915		0.00938442	0.0048198		0.0181095	-0.00130625		0.00421685	-0.00205851	0.000540522
83	C<->F	1	0.00443	0.00216627	0.0038148	0.00976	0.00804		0.00564221	0.00824898		0.0065112	-0.00434493		0.00257933	0.00546067		0.00461277	0.00514723		-0.00608271	-0.000208979	0.00151102
132	K<->T	1	0.00424	0.00356062	0.00541819	0.00537	0.00876832		0.00547143	0.005308		0.00594913	-0.0023885		0.00313163	0.00563668		0.00549678	-0.000126783		-0.00174738	0.00346032	6.19994e-05
171	W<->Y	2	0.0201	0.0167303	0.0142	0.0204	0.0157		0.0174261	0.0206673		0.0176	-0.000869713		0.00953799	0.00616201		0.0166826	0.00371743		-0.00393706	-0.00496735	-0.000267347
89	L<->F	1	0.0176	0.0164603	0.0139595	0.0198	0.0184		0.017244	0.0163		0.0174399	-0.000979624		0.0110781	0.0073219		0.016605	0.00319505		0.000160259	0.0021	0.0035
6	N<->D	1	0.0262665	0.029571	0.0280407	0.0254957	0.0212653		0.0261278	0.0232138		0.025267	0.00430395		0.0138588	0.0074065		0.0262859	-0.000790213		0.00635718	-0.0019485	0.00228185
108	N<->S	1	0.0170978	0.0219349	0.0167216	0.017761	0.0188642		0.0184759	0.0200178		0.0176112	0.00432377		0.011164	0.00770021		0.0186546	-0.000893583		0.00191715	-0.00115361	-0.00225674
34	Q<->H	1	0.0221	0.0209	0.0271494	0.0244849	0.0215		0.0232269	0.0208701		0.0238086	-0.00290859		0.0135365	0.00796352		0.0229124	0.00157254		2.98924e-05	0.000629892	0.00361479
57	R<->K	1	0.027	0.036703	0.0332032	0.0312	0.0250222		0.0306257	0.0291893		0.0291063	0.00759663		0.0169134	0.00810874		0.0304821	0.000717932		0.00751367	-0.00416712	0.00201072
30	R<->H	1	0.0105839	0.0101	0.0131795	0.0146002	0.0154		0.0127727	0.0129641		0.0134409	-0.0033409		0.00672474	0.00867526		0.0123158	0.0022844		-0.00286406	0.00243594	0.00163618
136	S<->T	1	0.0321	0.0356271	0.0272	0.0308	0.0263412		0.0304137	0.0324972		0.0291103	0.00651682		0.0172762	0.00906506		0.0303171	0.000482908		0.00312991	-0.00615598	-0.00169722
76	I<->M	1	0.0201	0.0147363	0.0195199	0.0185	0.0194444		0.0184601	0.0204344		0.0193911	-0.00465477		0.010183	0.00926143		0.0184502	4.98385e-05		-0.00569812	-0.00099002	-0.00193443
50	C<->L	2	0.00243	0.00112	0.00291	0.00398975	0.0111		0.00430995	0.00436153		0.00510744	-0.00398744		0.00135869	0.00974131		0.00439	-0.000400249		-0.00324153	0.00673847	-0.000371775
31	N<->H	1	0.0218	0.0232967	0.0201179	0.0258327	0.0285427		0.023918	0.025773		0.0240733	-0.00077669		0.0174389	0.0111039		0.0234393	0.00239336		-0.00247638	0.00276971	5.9662e-05
55	I<->L	1	0.0238895	0.0269467	0.0193	0.0263693	0.0286		0.0250211	0.0254409		0.0245397	0.00240705		0.0130039	0.0155961		0.0246841	0.0016852		0.00150589	0.00315914	0.000928409
12	R<->Q	1	0.0102	0.00853477	0.0127385	0.0139	0.0262		0.0143147	0.0127099		0.0157596	-0.00722486		0.00753136	0.0186686		0.0144183	-0.000518317		-0.00417514	0.0134901	0.00119009
167	F<->Y	1	0.0488	0.0513818	0.0502059	0.0654	0.0526597		0.0536895	0.0657139		0.0542664	-0.00288456		0.0280567	0.024603		0.0507618	0.0146382		-0.0143321	-0.0130543	-0.00031391
61	Q<->K	1	0.0113206	0.0112973	0.016398	0.0148368	0.0325648		0.0172835	0.0152945		0.01878	-0.00748276		0.00679063	0.0257742		0.0178952	-0.00305837		-0.00399721	0.0172703	-0.000457703
162	H<->Y	1	0.0379885	0.0354714	0.0426464	0.0364877	0.0463078		0.0397803	0.0336591		0.0408576	-0.00538618		0.0192256	0.0270822		0.0406035	-0.00411583		0.0018123	0.0126487	0.00282858
181	I<->V	1	0.0597416	0.0596816	0.0505	0.0587	0.0732		0.0603647	0.0656016		0.0605354	-0.000853786		0.0287943	0.0444057		0.0607808	-0.00208081		-0.00591997	0.00759841	-0.00690159

## Sheet: 2. State frequencies
Lineage	Ala	Arg	Asn	Asp	Cys	Gln	Glu	Gly	His	Ile	Leu	Lys	Met	Phe	Pro	Ser	Thr	Trp	Tyr	Val		GARP	FYMINK		Acidic	Basic	Acidic/Basic Ratio
DPANN_all_prot	0.0533783	0.0455453	0.0530999	0.0538328	0.00779897	0.0312823	0.106824	0.0517808	0.0148353	0.0764576	0.0768205	0.14249	0.0214522	0.0355294	0.0347806	0.0601234	0.043266	0.00630722	0.0268083	0.0575874		0.185485	0.355837		0.160657	0.202871	0.791918
Halobacteriaceae_all_prot	0.112473	0.0694959	0.0206919	0.120951	0.00411956	0.0271632	0.13037	0.070807	0.0170105	0.0353314	0.0697559	0.016784	0.0124808	0.0219943	0.0454	0.0609477	0.0651443	0.00599117	0.0183882	0.0747008		0.298176	0.125671		0.251321	0.10329	2.43315
Methanomicrobia_all_prot	0.0794647	0.0632059	0.0393159	0.0670623	0.00953326	0.0330285	0.102766	0.0573379	0.0197743	0.0662556	0.0749968	0.0772812	0.0244558	0.0275408	0.042397	0.0634579	0.054004	0.00496045	0.0245829	0.0685788		0.242405	0.259432		0.169828	0.160261	1.0597
Thaumarchaeota_all_prot	0.0606116	0.0341814	0.0562441	0.0583975	0.00836027	0.03706	0.0782219	0.0498919	0.0173572	0.0860585	0.0780612	0.0979991	0.025682	0.0392506	0.031956	0.0794064	0.0605592	0.0055289	0.0267029	0.0684696		0.176641	0.331937		0.136619	0.149538	0.913612
Thermoprotei_all_prot	0.0695625	0.0770666	0.0352937	0.0500343	0.00324721	0.0244612	0.103357	0.0544142	0.0144547	0.0669101	0.0868489	0.0925405	0.0235169	0.0285706	0.0438346	0.0567546	0.0406831	0.00996763	0.0367671	0.0817143		0.244878	0.283599		0.153391	0.184062	0.833368
mean	0.075098	0.057899	0.0409291	0.0700556	0.00661185	0.030599	0.104308	0.0568463	0.0166864	0.0662026	0.0772966	0.0854189	0.0215175	0.0305771	0.0396736	0.064138	0.0527313	0.00655107	0.0266499	0.0702102		0.229517	0.271295		0.174363	0.160004
min	0.0533783	0.0341814	0.0206919	0.0500343	0.00324721	0.0244612	0.0782219	0.0498919	0.0144547	0.0353314	0.0697559	0.016784	0.0124808	0.0219943	0.031956	0.0567546	0.0406831	0.00496045	0.0183882	0.0575874		0.176641	0.125671		0.128256	0.0654201
max	0.112473	0.0770666	0.0562441	0.120951	0.00953326	0.03706	0.13037	0.070807	0.0197743	0.0860585	0.0868489	0.14249	0.025682	0.0392506	0.0454	0.0794064	0.0651443	0.00996763	0.0367671	0.0817143		0.298176	0.355837		0.251321	0.239331
mean excluding Thermoprotei	0.0764819	0.0531071	0.0423379	0.0750609	0.00745301	0.0321335	0.104545	0.0574544	0.0172443	0.0660258	0.0749086	0.0836386	0.0210177	0.0310788	0.0386334	0.0659838	0.0557434	0.00569693	0.0241206	0.0673341		0.225677	0.268219		0.179606	0.15399
diff (Thermoprotei - others)	-0.00691936	0.0239595	-0.00704423	-0.0250266	-0.0042058	-0.00767228	-0.00118841	-0.00304017	-0.00278962	0.000884359	0.0119403	0.00890197	0.00249921	-0.00250816	0.00520122	-0.00922922	-0.0150602	0.0042707	0.0126465	0.0143802		0.0192012	0.0153797		-0.026215	0.0300719
mean excluding Halobacteriaceae	0.0657543	0.0549998	0.0459884	0.0573317	0.00723493	0.031458	0.0977922	0.0533562	0.0166054	0.0739204	0.0791818	0.102578	0.0237767	0.0327228	0.038242	0.0649356	0.0496281	0.00669105	0.0287153	0.0690875		0.212352	0.307701		0.155124	0.174183
diff (Halobacteriaceae - others)	0.0467187	0.0144961	-0.0252965	0.0636192	-0.00311537	-0.00429481	0.0325777	0.0174508	0.000405116	-0.0385891	-0.00942599	-0.0857937	-0.0112959	-0.0107286	0.00715792	-0.00398791	0.0155162	-0.000699884	-0.0103271	0.00561323		0.0858234	-0.182031		0.0961969	-0.0708925
mean excluding Methanomicrobia	0.0740063	0.0565723	0.0413324	0.0708039	0.0058815	0.0299917	0.104693	0.0567235	0.0159144	0.0661894	0.0778716	0.0874534	0.020783	0.0313362	0.0389928	0.064308	0.0524131	0.00694873	0.0271666	0.070618		0.226295	0.274261		0.175497	0.15994
diff (Methanomicrobia - others)	0.00545837	0.00663361	-0.00201649	-0.00374158	0.00365176	0.00303683	-0.0019272	0.000614439	0.00385988	6.62119e-05	-0.00287481	-0.0101722	0.00367283	-0.00379542	0.00340421	-0.00085011	0.00159086	-0.00198828	-0.00258372	-0.00203921		0.0161106	-0.0148288		-0.00566878	0.000321303
