# Supplementary material for: The Structure of Evolutionary Model Space for Proteins Across the Tree of Life
Source: Preprints.org preprint supplement (doi:10.20944/preprints202212.0403.v1), 2022-12-21
Supplement: Supplementary file 5 [file Scolaro_Braun_Supplementary_File_S4.xlsx]

## Sheet: Bacterial REs
#	Exchange	Min subs	Micrococcineae	Xanthomonadaceae	Comamonadaceae	Rhodospirillales	Chromatiales	Oceanospirillales	Enterobacteriaceae	Alteromonadaceae	Bacillaceae	Cytophagales	Lactobacillales	Selenomonadales		mean	mean high GC	mean low GC		Difference high GC-low GC
106	A<->S	1	0.0182987	0.0174522	0.0171238	0.0199656	0.021	0.0231155	0.0207595	0.0234	0.0319071	0.0343	0.0297149	0.0260477		0.0235904	0.0194926	0.0276882		-0.00819557
7	A<->C	2	0.01329	0.00944731	0.00806	0.0138263	0.00883	0.0139665	0.00500441	0.0131	0.0194908	0.0155	0.022741	0.0143249		0.0131318	0.0112367	0.0150268		-0.00379015
110	C<->S	1	0.0146037	0.0150275	0.0174	0.0143066	0.0180678	0.0171283	0.0235	0.0156852	0.0194364	0.0213	0.0177	0.018866		0.0177518	0.016089	0.0194146		-0.00332561
172	A<->V	1	0.00724	0.008249	0.00814446	0.00803475	0.00936	0.00895875	0.0108	0.00941	0.0141439	0.0106	0.012	0.0108765		0.00981811	0.00833116	0.0113051		-0.00297391
30	R<->H	1	0.0106971	0.0133048	0.0135	0.0105773	0.0128	0.0112994	0.0173058	0.0103	0.012767	0.01	0.0173215	0.017787		0.0131383	0.0120298	0.0142469		-0.00221713
22	A<->G	1	0.00765613	0.00783584	0.0082709	0.00858279	0.00922938	0.00900004	0.00920048	0.00968822	0.0130476	0.0111694	0.0105897	0.00996904		0.00951996	0.00842918	0.0106107		-0.00218156
149	M<->W	2	0.00302264	0.00339671	0.00268125	0.00379869	0.00239	0.00407671	0.00341178	0.00409101	0.00568672	0.00858457	0.00423061	0.00505079		0.00420179	0.00322767	0.00517591		-0.00194825
121	A<->T	1	0.00634858	0.00840176	0.00846533	0.00675605	0.00988164	0.00735607	0.0113328	0.00757446	0.0110073	0.00932299	0.00879958	0.0102226		0.00878909	0.00786824	0.00970995		-0.00184171
89	L<->F	1	0.0152	0.0140917	0.0149486	0.014951	0.016003	0.0156479	0.0173	0.0162	0.018432	0.0141593	0.0173	0.018016		0.0160208	0.0151404	0.0169012		-0.00176084
92	A<->P	1	0.00439742	0.00558899	0.00651888	0.00497533	0.00573734	0.00652238	0.00751747	0.00734067	0.00671771	0.00859681	0.00675427	0.00649156		0.0064299	0.00562339	0.00723642		-0.00161303
57	R<->K	1	0.0287	0.0249122	0.0303	0.0290303	0.0249	0.0277172	0.0256	0.0301	0.0312743	0.0312011	0.0265	0.0298794		0.0283429	0.0275933	0.0290925		-0.00149919
120	P<->S	1	0.00431197	0.00505955	0.00483074	0.00483033	0.00651606	0.0054927	0.00676306	0.0050877	0.00785374	0.00620877	0.00662808	0.00740924		0.005916	0.00517356	0.00665843		-0.00148487
6	N<->D	1	0.0182419	0.0220562	0.022	0.0213155	0.0232	0.0212869	0.0243	0.0216	0.0247626	0.0179	0.0234396	0.0245361		0.0220532	0.0213501	0.0227564		-0.00140629
77	L<->M	1	0.0387	0.0375268	0.0389	0.036891	0.0375	0.041717	0.0404	0.041	0.0372859	0.045	0.0369806	0.0388582		0.03923	0.0385391	0.0399208		-0.00138165
158	C<->Y	1	0.00398	0.00676045	0.00731819	0.00548808	0.00803613	0.00649372	0.0116	0.00597	0.00726409	0.00314	0.0056838	0.0119944		0.0069774	0.0063461	0.00760871		-0.00126261
188	T<->V	2	0.008566	0.0104864	0.00897712	0.0104914	0.00887925	0.0110547	0.00912437	0.0110344	0.0116332	0.0116368	0.0120018	0.0103174		0.0103502	0.00974248	0.010958		-0.00121551
64	H<->K	2	0.00295875	0.00243158	0.0014188	0.00294159	0.0019269	0.00281584	0.00277515	0.0031295	0.00284938	0.00223492	0.00545673	0.00490548		0.00298705	0.00241558	0.00355853		-0.00114295
83	C<->F	1	0.00803	0.00994408	0.00961	0.00657561	0.0105	0.00860315	0.0139	0.00944	0.0088214	0.00815	0.00763	0.0111459		0.00936251	0.00887714	0.00984788		-0.000970736
62	E<->K	1	0.00367375	0.00337293	0.00203691	0.00485934	0.00408456	0.00396946	0.00374786	0.00429115	0.00525767	0.00287361	0.005929	0.00511217		0.0041007	0.00366616	0.00453524		-0.000869086
138	R<->W	1	0.00188	0.00172384	0.00223241	0.00215742	0.00303	0.00247916	0.00262	0.00208	0.00381613	0.0031	0.00299	0.00405797		0.00268058	0.00225047	0.00311068		-0.000860211
8	R<->C	1	0.00166573	0.00633066	0.00514	0.00200729	0.00792	0.00472959	0.0107	0.0041	0.00309365	0.00272	0.00411	0.00799701		0.00504283	0.00463221	0.00545344		-0.000821231
26	C<->G	1	0.00173398	0.00345149	0.00382	0.00232682	0.00352215	0.00272088	0.00549621	0.00307	0.00359919	0.00333638	0.00253985	0.00427625		0.00332443	0.00292922	0.00371965		-0.000790427
155	R<->Y	2	0.000490257	0.000380935	0.000264	0.000618587	0.000441	0.00123113	0.00104168	0.00117037	0.00153002	0.00127	0.00192686	0.00102876		0.000949466	0.000570985	0.00132795		-0.000756963
67	A<->M	2	0.00304866	0.00336082	0.00241722	0.00357253	0.00298665	0.00314843	0.00311449	0.00362	0.00467451	0.00388989	0.00401864	0.00341101		0.00343857	0.00308905	0.00378809		-0.000699035
136	S<->T	1	0.0284	0.036129	0.0341	0.0345804	0.0366276	0.0338275	0.0325	0.0336999	0.0343367	0.0382	0.0348	0.0339272		0.0342607	0.0339441	0.0345773		-0.000633222
68	R<->M	1	0.0012153	0.00134712	0.000878	0.00143447	0.00123	0.00149969	0.00120277	0.00132	0.00214552	0.00204156	0.0022687	0.00178702		0.00153084	0.00126743	0.00179426		-0.000526832
3	R<->N	2	0.00328993	0.00255378	0.00222	0.00334407	0.00269	0.0032685	0.00255303	0.00322	0.00401342	0.00422	0.00340566	0.00309054		0.00315574	0.00289438	0.00341711		-0.000522729
176	C<->V	2	0.0149	0.0115176	0.00901937	0.0161771	0.011913	0.014149	0.00614	0.0146061	0.012673	0.013	0.0216	0.0126082		0.0131919	0.012946	0.0134379		-0.000491867
88	I<->F	1	0.0056606	0.00538363	0.0043084	0.00503824	0.00402284	0.00506612	0.00639	0.0061814	0.00549709	0.00454	0.00545	0.00424782		0.00514884	0.00491331	0.00538438		-0.000471079
97	Q<->P	1	0.00200137	0.00177568	0.00172778	0.00186391	0.00181134	0.00154622	0.00237512	0.00163	0.00208344	0.00266056	0.00184816	0.0028083		0.00201099	0.00178772	0.00223426		-0.000446547
130	I<->T	1	0.00189692	0.00417187	0.00347	0.00268386	0.00438947	0.00316893	0.00528197	0.00337	0.00327312	0.00432	0.00312289	0.00307296		0.0035185	0.00329684	0.00374016		-0.000443317
169	S<->Y	1	0.00104058	0.00111355	0.000862	0.000660711	0.000992	0.000986776	0.00131255	0.00100431	0.00134002	0.00168	0.00146555	0.00143347		0.00115763	0.000942602	0.00137265		-0.00043005
147	L<->W	1	0.00348492	0.00504214	0.00720859	0.00396299	0.0059948	0.00572098	0.00499287	0.00511274	0.00650879	0.0062071	0.00548257	0.00567887		0.00544978	0.00523574	0.00566382		-0.000428087
112	E<->S	2	0.00201	0.00147138	0.00125821	0.00190915	0.00174	0.00228732	0.00163	0.00247	0.00252774	0.00193	0.00265	0.00197423		0.00198817	0.00177934	0.002197		-0.000417651
154	A<->Y	2	0.000475466	0.000350174	0.000262	0.000472172	0.000397437	0.000786878	0.000422	0.000706	0.00103734	0.000932116	0.00108865	0.000823651		0.000646157	0.000457354	0.000834959		-0.000377605
98	E<->P	2	0.00205145	0.00143797	0.00147	0.00197726	0.00134	0.00196833	0.0016221	0.00219	0.0021842	0.00194439	0.00224291	0.00231878		0.00189562	0.0017075	0.00208373		-0.000376228
100	H<->P	1	0.0014608	0.00152101	0.00191	0.00132986	0.0016962	0.0013805	0.00177498	0.00159	0.00188609	0.00274373	0.00162209	0.001891		0.00173386	0.00154973	0.00191798		-0.000368254
127	E<->T	2	0.00290797	0.00255572	0.00193703	0.00285476	0.00246	0.0030469	0.00257326	0.00326	0.00262843	0.00312	0.00332821	0.00281498		0.0027906	0.00262706	0.00295415		-0.000327081
144	G<->W	1	0.00138137	0.00127557	0.00170478	0.00114715	0.00177384	0.00125583	0.0025	0.00107988	0.00190307	0.00126229	0.00169096	0.00206334		0.00158651	0.00142309	0.00174992		-0.000326834
79	A<->F	2	0.000813614	0.000724646	0.000609	0.000916543	0.000577	0.00102524	0.000923	0.00108	0.00140732	0.001	0.00113	0.00107032		0.000939724	0.000777674	0.00110177		-0.000324099
18	N<->E	2	0.00132	0.0010691	0.000839	0.00110742	0.00114	0.00131442	0.00122	0.00153	0.0018746	0.00117	0.00162	0.00125901		0.00128863	0.00113166	0.0014456		-0.000313944
185	F<->V	1	0.00299543	0.00267424	0.00183321	0.00279304	0.00265934	0.00238983	0.00319446	0.00317344	0.00316705	0.00206786	0.00275282	0.00265662		0.00269645	0.00255751	0.00283538		-0.000277862
135	P<->T	1	0.00213952	0.00256981	0.0026	0.00208812	0.00232	0.00245952	0.00265576	0.00245558	0.00230312	0.0037	0.0023	0.00242719		0.00250155	0.00236283	0.00264028		-0.000277448
103	K<->P	2	0.00174753	0.00168877	0.00148525	0.00210458	0.00115	0.00174649	0.00150837	0.00194899	0.00179526	0.00177891	0.00223175	0.0022497		0.0017863	0.00165377	0.00191883		-0.000265061
170	T<->Y	2	0.000498428	0.000533641	0.000485	0.000904015	0.000474226	0.000748352	0.000482	0.000817	0.00104584	0.00086	0.00108	0.00080339		0.000727657	0.000607277	0.000848038		-0.000240761
159	Q<->Y	2	0.000671376	0.000315705	0.000159882	0.00052653	0.000367	0.000427811	0.000198331	0.000385	0.000802598	0.000830047	0.000836	0.000851398		0.000530973	0.000411384	0.000650562		-0.000239178
186	P<->V	2	0.00102224	0.000962823	0.00089971	0.00119327	0.000881079	0.00108698	0.000968	0.0013125	0.00102442	0.00167785	0.00149	0.000998289		0.00112643	0.00100768	0.00124518		-0.000237493
73	E<->M	2	0.00029252	0.00037926	0.00025	0.000404526	0.00026	0.000340355	0.000354	0.000304	0.000457123	0.000729329	0.000738	0.000747041		0.000438013	0.00032111	0.000554915		-0.000233805
178	E<->V	1	0.000752	0.000784409	0.000746995	0.000625707	0.000590721	0.000971198	0.00112	0.00101	0.000824702	0.00091	0.00112	0.000834677		0.000857534	0.000745172	0.000969897		-0.000224725
41	C<->I	2	0.000656	0.00104699	0.000799	0.00132344	0.0011	0.00155315	0.00215	0.00196	0.000705223	0.000719	0.00127	0.000925721		0.00118404	0.00107976	0.00128832		-0.000208561
164	L<->Y	2	0.00136842	0.000525925	0.000564761	0.00104191	0.000637296	0.00104686	0.000485	0.000983	0.00103248	0.00162259	0.0014978	0.000758508		0.000963713	0.000864197	0.00106323		-0.000199033
38	R<->I	1	0.000223973	0.000169337	8.59e-05	0.000279362	0.000163	0.000312385	0.000263	0.000451	0.000405016	0.000441	0.000512	0.000279853		0.000298819	0.000205659	0.000391978		-0.000186319
74	G<->M	2	0.000781327	0.00061801	0.000479	0.000790181	0.000943	0.000461531	0.000647	0.000556	0.000637479	0.00168	0.000680907	0.000958873		0.000769442	0.000678842	0.000860043		-0.000181202
78	K<->M	1	0.0023	0.00255045	0.00198	0.00227637	0.00306	0.00241298	0.00228	0.00277	0.00324785	0.00241	0.00251	0.00242889		0.00251888	0.00242997	0.00260779		-0.000177822
95	D<->P	2	0.00207113	0.00170858	0.00164832	0.00221052	0.00160065	0.00198095	0.00118171	0.00231	0.00196361	0.00217517	0.00250164	0.00212834		0.00195672	0.00187003	0.00204341		-0.000173387
116	L<->S	1	0.000262831	0.000459562	0.000349541	0.00021746	0.000303169	0.00023783	0.000608056	0.000381371	0.000363032	0.000650047	0.000467	0.000393549		0.000391121	0.000305065	0.000477176		-0.00017211
119	F<->S	1	0.00085234	0.00115997	0.00110563	0.000832467	0.000892715	0.000869665	0.00137467	0.000680944	0.00114208	0.00111769	0.000963802	0.00144438		0.00103636	0.000952131	0.00112059		-0.000168463
165	K<->Y	2	0.000229753	8.29e-05	9.38e-05	4.68514e-05	0.00012	0.000245112	8.95e-05	0.000427	0.000557561	0.000113967	0.000419965	0.000217152		0.000220297	0.000136403	0.000304191		-0.000167788
157	D<->Y	1	0.000197645	0.000427665	0.000198	0.000164253	0.000375598	0.00024671	0.000667	0.000228651	0.000405518	0.000336418	0.00049218	0.000470559		0.00035085	0.000268312	0.000433388		-0.000165076
16	A<->E	1	0.00534	0.00520885	0.0057	0.00593564	0.00642	0.00564362	0.00697	0.00634	0.0045931	0.00508	0.00573	0.00651257		0.00578948	0.00570802	0.00587095		-0.000162927
47	R<->L	1	0.00161	0.00145319	0.00183	0.00143475	0.00182	0.00171335	0.0019	0.00175	0.00173625	0.00187	0.00183	0.00172323		0.00172256	0.00164355	0.00180158		-0.000158032
65	I<->K	1	0.000408718	0.000263618	0.000178115	0.000210983	0.000262582	0.000422636	0.000456266	0.000515	0.000409923	0.000466489	0.000463714	0.000319022		0.000364755	0.000291109	0.000438402		-0.000147294
168	P<->Y	2	0.000167	8.54e-05	0.00013	0.000225531	0.000165	0.000245954	0.000148	0.000314	0.000329528	0.00046	0.000364488	0.000279092		0.000242833	0.000169814	0.000315851		-0.000146037
66	L<->K	2	0.000736198	0.000407421	0.000485309	0.000478131	0.000296	0.000720166	0.000324416	0.000747081	0.000614486	0.000751628	0.0010198	0.000512135		0.000591065	0.000520538	0.000661592		-0.000141054
148	K<->W	2	7.97e-05	0.000183663	1.5e-05	9.06152e-05	0.000120668	0.000115254	0.000121194	0.000235	7.06679e-05	0.000137689	0.000296153	0.000537588		0.000166933	0.000100817	0.000233049		-0.000132232
96	C<->P	2	0.000116615	8.6e-06	6.14e-05	0.000222469	0.000147	0.000154135	1.57e-05	6.68e-05	0.000140268	0.000391111	0.000472626	0.000338175		0.000177908	0.00011837	0.000237447		-0.000119077
156	N<->Y	1	0.00272973	0.0015304	0.00113458	0.00200996	0.0015519	0.00140004	0.00238359	0.00125551	0.00190391	0.00136	0.00226	0.00186251		0.00178184	0.0017261	0.00183759		-0.000111483
183	K<->V	2	0.00061847	0.000518517	0.000654	0.000722331	0.000456243	0.000945717	0.000606226	0.000850562	0.000832448	0.00075684	0.00101986	0.00051808		0.000708274	0.000652546	0.000764002		-0.000111456
37	A<->I	2	0.000147	0.000160387	9.53e-05	0.00017909	0.000146	0.000182849	0.000221	0.000291	0.000271838	0.000409	0.000245	0.000124955		0.000206118	0.000151771	0.000260466		-0.000108695
107	R<->S	1	0.00324166	0.00333105	0.00385	0.00319577	0.0039	0.00363105	0.00446127	0.00352	0.00379199	0.00345452	0.00314525	0.00339731		0.00357666	0.00352492	0.00362839		-0.000103469
160	E<->Y	2	0.000139822	0.000102674	0.000123798	0.000111249	0.00015	0.000214917	8.54e-05	0.000149517	0.000237354	0.000229564	0.000403	0.000341322		0.000190718	0.00014041	0.000241026		-0.000100616
10	D<->C	2	9.38e-05	0.000144845	0.000131	0.000209564	0.000167	0.000188543	9.94e-05	0.000267	0.000281939	0.00023	0.000256	0.000401613		0.000205892	0.000155792	0.000255992		-0.0001002
190	Y<->V	2	0.00110683	0.000659539	0.000637727	0.000622152	0.000599813	0.000859508	0.000428581	0.00091957	0.00112372	0.000515658	0.00148596	0.000556335		0.000792949	0.000747595	0.000838304		-9.07093e-05
80	R<->F	2	7.24e-05	0.00011515	0.000138	0.000134347	7.31e-05	0.000220163	0.000174	0.000285	0.000112186	0.000249	0.000317	0.000127953		0.000168192	0.000125527	0.000210857		-8.533e-05
179	G<->V	1	0.000222474	0.000287269	0.000200023	0.00013766	0.000207	0.000224921	0.000665764	0.000227542	0.000254253	0.000233	0.00020065	0.000173663		0.000252852	0.000213225	0.000292479		-7.9254e-05
35	E<->H	2	0.00190329	0.00114978	0.00114	0.00120772	0.00104	0.00125524	0.000909	0.0017	0.00176867	0.00118	0.00146	0.00109025		0.001317	0.00128267	0.00135132		-6.8647e-05
24	N<->G	2	0.00793528	0.0100035	0.00900483	0.00983811	0.00832	0.00973643	0.00923622	0.00945763	0.00902788	0.00945871	0.00869127	0.00937723		0.00917392	0.00913969	0.00920816		-6.84716e-05
105	F<->P	2	0.000262725	0.000334443	0.000244	0.000333039	0.000296	0.00035861	0.000312681	0.000387	0.000363622	0.000310748	0.00054534	0.000305616		0.000337819	0.000304803	0.000370835		-6.60319e-05
150	F<->W	2	0.0198666	0.0145818	0.0159283	0.0188541	0.0133024	0.0166098	0.0110519	0.0172425	0.0162994	0.0148486	0.0214432	0.0186475		0.0165563	0.0165238	0.0165889		-6.50453e-05
187	S<->V	2	0.000125986	0.000173714	0.000119203	9.83904e-05	0.000131126	0.000172236	0.000142353	0.00019674	0.000128819	0.00042995	0.000218391	8.7112e-05		0.000168668	0.000136776	0.000200561		-6.3785e-05
86	G<->F	2	0.000800544	0.000704579	0.000626	0.000692101	0.000566935	0.000433935	0.000391	0.000708048	0.000702829	0.00106	0.000588094	0.000753823		0.000668991	0.000637349	0.000700632		-6.32832e-05
161	G<->Y	2	0.00018	0.000160669	0.000143	0.000114471	0.000105473	0.000144688	0.000120337	0.00023651	8.41505e-05	0.000401621	0.000258192	0.000124895		0.000172834	0.000141383	0.000204284		-6.29007e-05
45	H<->I	2	0.000202314	0.000304028	0.000159	0.000296387	0.000175	0.000274218	0.000255	0.000253	0.000169026	0.00067	0.000241	0.000173438		0.000264368	0.000235158	0.000293577		-5.84196e-05
152	S<->W	1	0.000966749	0.000988624	0.00099229	0.0015702	0.00101	0.00114076	0.000839083	0.000873	0.00119238	0.00117	0.00109021	0.00183868		0.00113933	0.00111144	0.00116722		-5.57862e-05
153	T<->W	2	0.000689209	0.000673967	0.000643821	0.000558585	0.000731	0.000566449	0.000446996	0.000613947	0.000996766	0.00118666	0.000510706	0.000426138		0.000670353	0.000643838	0.000696868		-5.30298e-05
143	E<->W	2	0.000167038	7.23e-05	0.000117833	0.00018375	0.000109114	0.00017323	0.000146942	7.54e-05	0.000112864	0.00034755	0.000177143	0.000238923		0.000160174	0.000137211	0.000183137		-4.59262e-05
140	D<->W	3	7.25e-05	5.56e-05	1.64e-05	8.26249e-05	6.02e-05	0.000105617	7.15e-05	5.5e-05	1.04082e-05	0.000278235	0.000173499	6.23849e-05		8.69974e-05	6.54903e-05	0.000108505		-4.30142e-05
15	C<->Q	3	6.22e-05	0.000224169	0.000215	0.000102223	0.000733	0.000279463	0.000568	0.00048	6.03311e-05	0.000395	5.93e-05	0.000270581		0.000287439	0.000269343	0.000305535		-3.61927e-05
163	I<->Y	2	0.000551992	0.000431042	0.000227532	0.000870211	0.000439	0.000586934	0.00043455	0.00074394	0.000553362	0.000431	0.000810396	0.000348407		0.000535697	0.000517785	0.000553609		-3.5824e-05
102	L<->P	1	0.000667153	0.000929249	0.000992404	0.000869073	0.00120493	0.000853121	0.00122176	0.000699	0.000870482	0.00100314	0.000776769	0.00115214		0.000936602	0.000919322	0.000953881		-3.4559e-05
43	E<->I	2	4.27e-05	7.27e-05	5.63e-05	5.5024e-05	2.66e-05	6.87644e-05	9.69e-05	9.24e-05	3.30327e-05	0.00013	9.65e-05	5.79397e-05		6.90717e-05	5.36814e-05	8.44621e-05		-3.07807e-05
94	N<->P	2	0.000625022	0.000594029	0.000613799	0.00058991	0.000377	0.000713943	0.000476418	0.00078313	0.000612938	0.000673	0.000664124	0.000480514		0.000600319	0.000585617	0.000615021		-2.94034e-05
85	E<->F	3	3.41e-05	3.36e-05	2.11e-05	5.51925e-05	2.01e-05	5.28325e-05	1.77e-05	3.77e-05	4.41616e-05	0.000204	5.34e-05	3.09601e-05		5.04039e-05	3.61542e-05	6.46536e-05		-2.84995e-05
134	F<->T	2	0.000594049	0.000542219	0.000615	0.000594794	0.000464	0.000821751	0.000478	0.000661	0.000810293	0.000753	0.000574	0.000522538		0.00061922	0.000605302	0.000633138		-2.78363e-05
101	I<->P	2	0.000145874	0.000171825	9.46e-05	0.00013373	8.82e-05	0.000207353	9.91e-05	0.000224379	0.000184706	8.95e-05	0.000270171	0.00013549		0.000153744	0.000140264	0.000167224		-2.69605e-05
52	E<->L	2	0.000177	0.000141673	0.00017	0.000159471	0.000126	0.000218755	0.000121983	0.0002	0.00012583	0.000241	0.000270615	0.000182228		0.00017788	0.000165483	0.000190276		-2.47931e-05
131	L<->T	2	0.00120931	0.00110421	0.00121	0.00122659	0.00114	0.00113129	0.000908974	0.00136	0.00106354	0.00147	0.00144	0.000900183		0.00118034	0.00117023	0.00119045		-2.02183e-05
141	C<->W	1	0.00122909	0.00542717	0.00759	0.00141771	0.00738086	0.00396541	0.00656585	0.00343395	0.00402254	0.00171448	0.00398701	0.00739345		0.00451063	0.00450171	0.00451955		-1.78423e-05
109	D<->S	2	0.00562859	0.00473556	0.00417	0.00589934	0.00485	0.00586224	0.00386237	0.00584389	0.0052253	0.00513	0.00578989	0.00539744		0.00519955	0.00519096	0.00520815		-1.71934e-05
115	I<->S	1	6.64e-05	0.000171596	8.9e-05	5.6429e-05	0.000102672	6.35847e-05	0.000192926	0.000131343	5.14465e-05	8.83e-05	5.81e-05	0.000108661		9.83715e-05	9.16136e-05	0.000105129		-1.35158e-05
173	R<->V	2	0.000821199	0.000628578	0.00049	0.000675697	0.000515	0.000591342	0.000451	0.000684717	0.000626443	0.000795447	0.00074	0.000489722		0.000625762	0.000620303	0.000631221		-1.09189e-05
90	K<->F	3	1.63e-05	4.49e-05	0.000113817	1.82473e-05	4.97e-05	5.74651e-05	6.36e-05	6.91e-05	1.45681e-05	0.000120503	5.95e-05	3.77308e-05		5.54526e-05	5.00716e-05	6.08337e-05		-1.07621e-05
84	Q<->F	3	0.000164	7.31e-05	3.2e-05	0.00010496	5.43e-05	0.000110401	4.12e-05	5.6e-05	4.57893e-05	0.000288	0.000123	4.17308e-05		9.45402e-05	8.97936e-05	9.92867e-05		-9.49307e-06
166	M<->Y	3	0.00210617	0.0013921	0.000713546	0.00136581	0.000791	0.00148429	0.000768006	0.00117	0.00119842	0.00155	0.00172	0.0014829		0.00131185	0.00130882	0.00131489		-6.06924e-06
28	E<->G	1	0.00135912	0.00156452	0.00157762	0.00129612	0.00163	0.00125398	0.00202973	0.00104048	0.0017332	0.00141154	0.00106319	0.00143147		0.00144925	0.00144689	0.0014516		-4.70931e-06
42	Q<->I	2	0.000177	0.000197972	4.77e-05	0.000210935	9.78e-05	0.000140092	0.000108	0.000166	8.47198e-05	0.000294	0.000149	9.37381e-05		0.000147246	0.00014525	0.000149243		-3.99319e-06
20	C<->E	3	2.86e-07	1.91e-06	2.59e-07	9.43355e-08	5.51e-06	3.84897e-07	5.05e-07	1.04e-06	4.76627e-07	2.67e-07	5.83e-07	2.5557e-05		3.07274e-06	1.40737e-06	4.7381e-06		-3.33073e-06
175	D<->V	1	8.15e-05	6.74e-05	6.25e-05	4.75506e-05	4.16e-05	7.63643e-05	0.000132126	4.67e-05	3.35139e-05	3.78e-05	8.73e-05	5.9175e-05		6.44608e-05	6.28191e-05	6.61025e-05		-3.28334e-06
49	D<->L	2	4.96e-05	5.27e-05	2.37e-05	2.59882e-05	1.85e-05	4.20712e-05	2.26e-05	3.88e-05	1.83729e-05	1.73e-05	6.71e-05	4.47507e-05		3.51236e-05	3.54266e-05	3.48206e-05		6.05967e-07
50	C<->L	2	0.00406958	0.00386208	0.00454	0.00436177	0.00463	0.00514672	0.00376432	0.00448987	0.00457077	0.00425605	0.00535	0.00413027		0.00443095	0.00443503	0.00442688		8.1452e-06
40	D<->I	2	2.4e-05	4.55e-05	3.39e-05	5.61724e-06	1.88e-05	2.53387e-05	1.67e-05	7.6e-06	6.26377e-06	2.99e-05	1.6e-05	2.03229e-05		2.08285e-05	2.5526e-05	1.61311e-05		9.39489e-06
44	G<->I	2	5.38e-05	7.85e-05	8.1e-05	1.24308e-05	2.25e-05	3.92935e-05	9.34e-05	5.49e-05	2.90594e-05	5.13e-06	3.03e-05	1.21588e-05		4.2706e-05	4.79207e-05	3.74914e-05		1.04294e-05
82	D<->F	2	5.65e-05	9.62e-05	8.25e-05	5.33619e-05	4.62e-05	9.54169e-05	5.39e-05	3.69e-05	1.74806e-05	2.58e-05	0.000102	0.000113805		6.50054e-05	7.16965e-05	5.83143e-05		1.33821e-05
46	A<->L	2	0.00139	0.00127586	0.00155	0.00144264	0.00113	0.00129468	0.00113	0.00147	0.00150034	0.00132	0.00147	0.0011018		0.00133961	0.0013472	0.00133202		1.51721e-05
146	I<->W	3	0.000918558	0.000630944	0.000345343	0.000677167	0.000234	0.00100321	0.000454137	0.000377135	0.000828505	0.000202955	0.00108	0.000760692		0.000626054	0.00063487	0.000617237		1.76324e-05
48	N<->L	2	0.000465	0.000254713	0.000186	0.000236324	0.00013	0.000238131	0.000108	0.000221	0.000196578	0.000383	0.000299	0.000184481		0.000241852	0.000251695	0.00023201		1.96848e-05
60	C<->K	3	0.000177034	1.14e-05	3.19e-05	8.96637e-05	3.44e-05	3.44086e-05	1.35e-05	7.78e-05	6.79628e-06	9.85e-05	1.38e-05	3.81711e-05		5.22811e-05	6.31344e-05	4.14279e-05		2.17065e-05
70	D<->M	3	0.000144736	0.000176398	0.000259	0.000128392	8.1e-05	0.000143584	0.000117495	5.88e-05	0.000106657	0.000168733	0.000132399	0.000209876		0.000143922	0.000155518	0.000132327		2.31917e-05
53	G<->L	2	0.000327	0.000276849	0.000321349	0.000262183	0.000228	0.000300294	0.000257	0.000278525	0.000272438	0.000181	0.000300584	0.000270133		0.000272946	0.000285946	0.000259947		2.59993e-05
174	N<->V	2	0.000495	0.000424193	0.000244	0.000478617	0.000200414	0.000246665	0.000183	0.000339	0.000209999	0.000604	0.000348	0.000166528		0.000328285	0.000348148	0.000308421		3.97269e-05
137	A<->W	2	0.000949	0.000736179	0.0012	0.00107423	0.00102243	0.000862732	0.000505	0.000732	0.00105923	0.000975	0.00112027	0.00120414		0.000953351	0.000974094	0.000932607		4.14877e-05
36	G<->H	2	0.00199	0.00217046	0.00224	0.00199918	0.00175	0.00174308	0.00202	0.00134	0.00144234	0.0009	0.00325927	0.00262235		0.00195639	0.00198212	0.00193066		5.14586e-05
139	N<->W	3	0.000205161	0.000211066	0.000129312	0.000411996	2.72e-05	9.61827e-05	4.08e-05	0.000113	2.76231e-05	0.000286411	0.000202	7.27951e-05		0.000151962	0.000180153	0.000123772		5.63815e-05
151	P<->W	2	0.000574317	0.000526317	0.000491	0.000773793	0.00045767	0.000517605	0.000306084	0.000592	0.000628533	0.000818613	0.000194097	0.000454269		0.000527858	0.000556784	0.000498933		5.78512e-05
177	Q<->V	2	0.000881998	0.000920026	0.000809	0.000872823	0.000639428	0.000781021	0.000658824	0.000786362	0.000673536	0.000827541	0.000889736	0.000518438		0.000771561	0.000817383	0.00072574		9.16432e-05
111	Q<->S	2	0.00583435	0.00465514	0.00389	0.00607964	0.00378772	0.00501982	0.00308	0.00494	0.00558772	0.00502	0.00547561	0.00454243		0.00482604	0.00487778	0.00477429		0.000103487
180	H<->V	2	0.0010489	0.000624893	0.000466968	0.000755499	0.00034285	0.000700827	0.000343	0.000814	0.000373914	0.000890105	0.000576	0.000318444		0.000604616	0.000656656	0.000552577		0.000104079
51	Q<->L	1	0.00220116	0.00257752	0.00316	0.0026069	0.0027795	0.00257296	0.00318	0.00245	0.0018712	0.00315	0.00236	0.00220851		0.00259315	0.00264967	0.00253662		0.000113056
81	N<->F	2	0.000651	0.000314085	0.000408	0.000628291	0.000212	0.000403894	0.000161	0.000305	0.000101046	0.000515	0.000451	0.000393633		0.000378662	0.000436212	0.000321113		0.000115099
142	Q<->W	2	0.000677466	0.000615915	0.000479232	0.000783747	0.000765193	0.000656637	0.000446353	0.000393093	0.000541706	0.00062	0.0005693	0.000711961		0.00060505	0.000663032	0.000547069		0.000115963
56	A<->K	2	0.00302802	0.00274682	0.00211423	0.00369028	0.00217	0.00294309	0.00224874	0.00338	0.00217805	0.00211	0.00316	0.00291626		0.00272379	0.00278207	0.00266551		0.000116566
113	G<->S	1	0.00869173	0.0111528	0.0115005	0.0102764	0.0102	0.00945601	0.0127	0.00952073	0.00884704	0.0100706	0.00839	0.0109901		0.0101497	0.0102129	0.0100864		0.000126492
125	C<->T	2	0.00767688	0.00841064	0.00707627	0.00991599	0.00822418	0.0116667	0.00562613	0.0111117	0.00746322	0.0107389	0.00970984	0.00753619		0.00876305	0.00882844	0.00869766		0.000130781
132	K<->T	1	0.00564197	0.00584003	0.00439261	0.00541194	0.00545	0.0052003	0.00578	0.00579	0.00524298	0.00421	0.00500923	0.00510574		0.00525623	0.00532281	0.00518966		0.000133151
55	I<->L	1	0.0282414	0.02414	0.025	0.026542	0.0262	0.0267657	0.0223	0.0281	0.0262244	0.0272	0.0276	0.0246312		0.0260787	0.0261482	0.0260093		0.000138916
11	A<->Q	2	0.00494093	0.00455689	0.0045	0.00544966	0.0042	0.00453771	0.00339	0.00491	0.00390788	0.00594	0.00474	0.00445222		0.00462711	0.00469753	0.00455668		0.000140849
19	D<->E	1	0.0192	0.0242543	0.0292	0.0215161	0.0214	0.0207004	0.0287	0.0224	0.0213427	0.0217	0.0188	0.0224781		0.022641	0.0227118	0.0225701		0.000141679
117	K<->S	2	0.00325218	0.00315839	0.00212969	0.00335672	0.00296911	0.00354618	0.00258029	0.00353877	0.00311583	0.00252387	0.0031186	0.00256096		0.00298755	0.00306871	0.00290639		0.000162325
93	R<->P	1	0.00146	0.0012605	0.00134	0.00132535	0.00137707	0.0010684	0.00123636	0.00112	0.00153518	0.00128575	0.000953084	0.000688025		0.00122081	0.00130522	0.0011364		0.000168819
114	H<->S	2	0.00462	0.00423789	0.00483	0.00421938	0.00394799	0.00465025	0.00385	0.00414689	0.00495179	0.00463625	0.00388	0.00401901		0.00433245	0.00441758	0.00424732		0.000170263
124	D<->T	2	0.00207067	0.00178874	0.00136917	0.00213113	0.0018	0.00169995	0.00137389	0.00157442	0.00147264	0.00122463	0.00200906	0.00199651		0.00170923	0.00180994	0.00160852		0.000201419
59	D<->K	2	0.000814	0.000794642	0.000633	0.00115713	0.000703492	0.00078219	0.000476253	0.000737	0.000488963	0.000473	0.000848	0.000648765		0.000713037	0.000814076	0.000611997		0.00020208
5	R<->D	2	0.000637054	0.000317923	0.000216	0.000436101	0.000275	0.000273865	9.86e-05	0.000127	0.000223148	0.000166318	0.00014314	0.000161717		0.000256322	0.000359324	0.000153321		0.000206003
39	N<->I	1	0.000548	0.000839756	0.000654	0.00066975	0.000525	0.000428792	0.000636	0.000391	0.000310281	0.00036	0.000467	0.000256446		0.000507169	0.000610883	0.000403455		0.000207428
2	A<->N	2	0.00127064	0.001132	0.000935	0.00135904	0.0011216	0.00128635	0.000842833	0.00124	0.000514392	0.001169	0.0012583	0.000775325		0.00107537	0.0011841	0.000966641		0.000217463
27	Q<->G	2	0.00189015	0.00189992	0.00167964	0.00173488	0.00157	0.00151799	0.00119192	0.00138	0.00149229	0.00186	0.00151609	0.0015343		0.0016056	0.00171543	0.00149576		0.000219663
61	Q<->K	1	0.0159842	0.0130163	0.0140037	0.0150738	0.0162622	0.0142285	0.0138482	0.0145436	0.0158502	0.0117882	0.0147825	0.0163451		0.0146439	0.0147615	0.0145263		0.000235164
129	H<->T	2	0.00287096	0.00245051	0.0022	0.00289804	0.00228	0.00259076	0.00188	0.00272643	0.00299666	0.00169499	0.00253302	0.00201942		0.0024284	0.00254838	0.00230842		0.000239958
118	M<->S	2	0.00184	0.00299951	0.00264923	0.00181715	0.00170949	0.00179388	0.00174244	0.00186969	0.00195596	0.00241799	0.00207691	0.00128085		0.00201276	0.00213487	0.00189064		0.000244235
23	R<->G	1	0.00209	0.00222043	0.00236566	0.00177445	0.00244524	0.00151058	0.00213413	0.00141	0.00183994	0.00243917	0.00138424	0.00169981		0.0019428	0.00206773	0.00181788		0.000249848
91	M<->F	2	0.0106664	0.00824635	0.00689448	0.00958127	0.00656	0.00906826	0.00491114	0.00958565	0.00849608	0.00890235	0.0101	0.00747296		0.00837375	0.0085028	0.00824469		0.000258103
122	R<->T	1	0.00346995	0.00236854	0.00225637	0.00317689	0.00253222	0.00276026	0.00208092	0.00284357	0.00290348	0.00224944	0.0027861	0.00209661		0.00262703	0.00276071	0.00249335		0.000267352
104	M<->P	2	0.000956934	0.00118092	0.000928577	0.000821568	0.000757693	0.000609195	0.000380148	0.000668	0.000568823	0.00090357	0.000510211	0.000509873		0.000732959	0.000875814	0.000590104		0.00028571
29	A<->H	2	0.00224213	0.00167984	0.00136	0.00203773	0.0015511	0.00163034	0.000916	0.00173	0.00141088	0.00206253	0.00164186	0.00101365		0.00160634	0.00175019	0.00146249		0.000287701
128	G<->T	2	0.000781993	0.000778128	0.000764498	0.000688248	0.00078	0.000514442	0.000557514	0.000436	0.000311042	0.000661561	0.000222374	0.000371537		0.000572278	0.000717885	0.000426671		0.000291213
189	W<->V	2	0.0014785	0.00107275	0.000840247	0.0011125	0.00109725	0.000785424	0.000946778	0.000718114	0.000681307	0.000365158	0.00126198	0.000616915		0.000914743	0.00106444	0.000765041		0.000299403
99	G<->P	2	0.00157378	0.00111669	0.00107966	0.00138793	0.00103	0.000911136	0.000489488	0.00105216	0.000670081	0.00144	0.000856647	0.000727542		0.00102793	0.0011832	0.000872653		0.000310546
25	D<->G	1	0.00522839	0.00617509	0.00615306	0.005507	0.00639057	0.00509021	0.00608899	0.00531842	0.00586397	0.00504708	0.00465044	0.00554126		0.00558788	0.00575739	0.00541836		0.000339028
63	G<->K	2	0.00148703	0.00172336	0.00155057	0.00215191	0.00159819	0.00162516	0.00126749	0.0016437	0.0012974	0.000903486	0.00121425	0.00164057		0.00150859	0.00168937	0.00132782		0.000361554
133	M<->T	1	0.00852	0.0104053	0.00976	0.00898899	0.00927	0.00873023	0.0105	0.00804	0.00892501	0.0084053	0.00841611	0.00913615		0.00909142	0.00927909	0.00890376		0.000375324
126	Q<->T	2	0.00554929	0.00492761	0.00388	0.00572811	0.00415812	0.00449786	0.00321275	0.00508	0.00411944	0.0049162	0.00484767	0.00427325		0.00459919	0.00479017	0.00440822		0.000381948
4	A<->D	1	0.00206859	0.00224469	0.00228861	0.00202626	0.00258	0.00188336	0.00240542	0.00192	0.00100434	0.00147	0.00169411	0.00210929		0.00197456	0.00218192	0.00176719		0.000414728
54	H<->L	1	0.00190667	0.00167655	0.00209	0.00172101	0.00154201	0.00203695	0.00137	0.00176	0.00144328	0.00178373	0.00119083	0.000740863		0.00160516	0.00182886	0.00138145		0.000447414
17	R<->E	2	0.00176	0.000713798	0.000537	0.0014246	0.000938	0.000732551	0.000224	0.00059	0.000809082	0.000288	0.000572	0.000671167		0.000771683	0.00101766	0.000525708		0.00049195
14	D<->Q	2	0.00227365	0.00236246	0.00234	0.00212723	0.00175	0.00169536	0.00119	0.00199	0.00149788	0.00149	0.00184	0.00155139		0.00184233	0.00209145	0.00159321		0.000498237
13	N<->Q	2	0.0097	0.00764424	0.00699	0.00877684	0.00643	0.00772644	0.00539	0.00788	0.00866886	0.00705	0.00762	0.00753728		0.0076178	0.00787792	0.00735769		0.000520228
184	M<->V	1	0.00714	0.00894109	0.00899834	0.00715457	0.00819266	0.00699997	0.0104	0.00750165	0.00654108	0.00711	0.00664029	0.00605203		0.00763931	0.00790444	0.00737418		0.000530263
71	C<->M	3	0.00615651	0.0047316	0.00315	0.00582258	0.00242	0.00453432	0.00261	0.00491	0.00415662	0.000149	0.00667083	0.00484703		0.00417987	0.00446917	0.00389058		0.00057859
32	D<->H	1	0.00394335	0.00398743	0.00421	0.0035207	0.00396	0.00311589	0.00318	0.00318	0.00408029	0.0033009	0.00284649	0.00255618		0.0034901	0.00378956	0.00319064		0.000598915
34	Q<->H	1	0.0180615	0.0199454	0.02	0.0195497	0.0224	0.0172842	0.0200626	0.017	0.0206395	0.0189	0.0168	0.020055		0.0192248	0.0195401	0.0189095		0.000630619
76	I<->M	1	0.021509	0.0233233	0.0224	0.0192887	0.0219	0.0193759	0.0247	0.0208	0.0217204	0.0193	0.0191	0.0181915		0.0209674	0.0212995	0.0206353		0.000664169
75	H<->M	3	0.00188	0.00157675	0.00136	0.00218751	0.00135	0.00182447	0.000839745	0.00146	0.000914607	0.000909	0.00122	0.000764329		0.0013572	0.00169645	0.00101795		0.000678508
69	N<->M	2	0.00276532	0.0028847	0.00171227	0.00236587	0.00183	0.0015698	0.00106742	0.00151	0.0015183	0.00194	0.00151773	0.00141339		0.00184123	0.002188	0.00149447		0.000693523
1	A<->R	2	0.0028194	0.00196005	0.00184559	0.00250026	0.00227	0.00166581	0.000991351	0.00161474	0.00138271	0.00141429	0.00136502	0.00140388		0.00176942	0.00217685	0.001362		0.000814852
33	C<->H	2	0.00279	0.00474001	0.00463	0.00345472	0.00625	0.00418059	0.00355	0.00345	0.0030676	0.00411	0.00167626	0.00393291		0.00381934	0.00434089	0.0032978		0.00104309
9	N<->C	2	0.00435095	0.00324716	0.00201	0.0026458	0.00169	0.00267668	0.0018	0.00228	0.00106313	0.00103	0.00210495	0.00205251		0.00224593	0.0027701	0.00172176		0.00104833
31	N<->H	1	0.029339	0.026721	0.0320343	0.0251442	0.0282	0.0244079	0.0278406	0.0236	0.0282931	0.0248	0.0266	0.0278871		0.0270723	0.0276411	0.0265035		0.00113761
72	Q<->M	2	0.00775268	0.00597443	0.00383678	0.008117	0.00463	0.00540478	0.00321316	0.00507	0.00456111	0.00533	0.00541051	0.00513721		0.00536981	0.00595261	0.004787		0.00116561
87	H<->F	2	0.00505	0.00414892	0.00438	0.00468151	0.00274464	0.00375023	0.00173	0.00434823	0.00150321	0.00575	0.00246	0.00150409		0.00350424	0.00412588	0.00288259		0.0012433
12	R<->Q	1	0.0118	0.0113138	0.0139	0.0124194	0.0155	0.0105717	0.0113	0.00953	0.0138206	0.00964	0.010623	0.0130898		0.011959	0.0125842	0.0113339		0.00125028
58	N<->K	1	0.011	0.0113458	0.0096	0.00898915	0.012	0.00869307	0.0112	0.00944497	0.00907086	0.00637	0.00795257	0.00808198		0.00947904	0.0102713	0.00868673		0.00158461
123	N<->T	1	0.00968453	0.0125411	0.0096874	0.0102104	0.0110057	0.00910545	0.00950314	0.00932	0.00740842	0.00899471	0.00811915	0.00883838		0.00953487	0.0103724	0.0086973		0.00167514
145	H<->W	3	0.00517163	0.00239132	0.00377184	0.00529654	0.00303119	0.00202472	0.000769276	0.00228	0.000801332	0.00260288	0.00203268	0.00217885		0.00269602	0.00361454	0.0017775		0.00183704
21	Q<->E	1	0.0181299	0.017027	0.0173357	0.0175579	0.0154017	0.0136033	0.0132633	0.0146926	0.0144399	0.0123412	0.0148	0.0157554		0.0153623	0.0165093	0.0142154		0.00229387
181	I<->V	1	0.0663805	0.0718678	0.0695	0.0687302	0.0726	0.0708037	0.0726494	0.073428	0.0639371	0.072372	0.0650037	0.0583903		0.0688052	0.0699804	0.0676301		0.00235028
182	L<->V	1	0.0107	0.0109592	0.0119661	0.00953236	0.0106973	0.00829899	0.00865836	0.00858976	0.00780382	0.00796	0.00678	0.00652583		0.00903932	0.010359	0.00771963		0.00263938
108	N<->S	1	0.0206263	0.0256815	0.0235	0.0216578	0.0235	0.0201745	0.0226	0.0202	0.0178931	0.0172	0.0172886	0.0216279		0.0209958	0.0225233	0.0194683		0.00305507
162	H<->Y	1	0.031598	0.0329187	0.035	0.0306272	0.0348676	0.0327834	0.0291891	0.0321	0.0338707	0.0295	0.024414	0.0296589		0.0313773	0.0329658	0.0297888		0.00317706
171	W<->Y	2	0.0242636	0.021374	0.0251	0.0299106	0.0206	0.0253948	0.0296	0.0187	0.0129059	0.018	0.0169855	0.0230012		0.022153	0.0244405	0.0198654		0.00457507
167	F<->Y	1	0.0915461	0.077422	0.083	0.0711998	0.0726	0.0840843	0.073138	0.0774	0.0574042	0.0720709	0.0601688	0.0603288		0.0733636	0.0799753	0.0667518		0.0132236

## Sheet: State Frequencies
Model	Ala	Arg	Asn	Asp	Cys	Gln	Glu	Gly	His	Ile	Leu	Lys	Met	Phe	Pro	Ser	Thr	Trp	Tyr	Val		GARP	FYMINK	%GC
Alteromonadaceae_all_prot	0.0999885	0.0499565	0.0435151	0.068563	0.00751306	0.065279	0.091397	0.0505909	0.0230456	0.0485913	0.0823144	0.0674587	0.0208478	0.0272037	0.0423822	0.0654649	0.0547888	0.0080013	0.022363	0.0607351		0.242918	0.22998	45.9
Chromatiales_all_prot	0.128014	0.0920595	0.0228083	0.0686547	0.0073869	0.0494196	0.091173	0.0659529	0.0248377	0.0398673	0.0841488	0.0321182	0.017726	0.0223341	0.0603078	0.0534758	0.0519591	0.00869312	0.0177472	0.0613159		0.346334	0.152601	62.15
Coelomata_all_prot	0.0598168	0.0524057	0.0570647	0.0556283	0.0203844	0.0404865	0.0636896	0.0520778	0.0244812	0.0592463	0.0875222	0.0711228	0.0249383	0.0423155	0.0459687	0.0814395	0.0577443	0.0103223	0.0300231	0.0633222		0.210269	0.284711	40.7158
Comamonadaceae_all_prot	0.158353	0.0726681	0.0230844	0.054818	0.00677178	0.0595456	0.0668175	0.0670063	0.0241059	0.0338835	0.0834265	0.0384059	0.0207095	0.0216595	0.0689317	0.0592837	0.0536485	0.00934134	0.0143052	0.0632337		0.366959	0.152048	65.3813
Cytophagales_all_prot	0.0716987	0.0424104	0.0537434	0.0653663	0.00507906	0.0580569	0.113372	0.0470846	0.0193441	0.0571252	0.0738132	0.104206	0.0203504	0.0302702	0.0355888	0.0575936	0.052454	0.00566068	0.0300169	0.0567651		0.196783	0.295712	40.6
DPANN_all_prot	0.0533783	0.0455453	0.0530999	0.0538328	0.00779897	0.0312823	0.106824	0.0517808	0.0148353	0.0764576	0.0768205	0.14249	0.0214522	0.0355294	0.0347806	0.0601234	0.043266	0.00630722	0.0268083	0.0575874		0.185485	0.355837	34.05
Enterobacteriaceae_all_prot	0.106456	0.0562388	0.0434498	0.059904	0.00768027	0.0703374	0.0778157	0.0471381	0.0259393	0.049723	0.0868764	0.0562734	0.0211087	0.0251578	0.0475018	0.0682706	0.0588448	0.00887763	0.0210697	0.0613373		0.257335	0.216782	52.1753
Halobacteriaceae_all_prot	0.112473	0.0694959	0.0206919	0.120951	0.00411956	0.0271632	0.13037	0.070807	0.0170105	0.0353314	0.0697559	0.016784	0.0124808	0.0219943	0.0454	0.0609477	0.0651443	0.00599117	0.0183882	0.0747008		0.298176	0.125671	63.7
Lactobacillales_all_prot	0.0734173	0.0404061	0.0509408	0.0705189	0.00405618	0.0585213	0.110311	0.0478267	0.0215546	0.0606396	0.0746505	0.0929355	0.0229129	0.0298252	0.0350949	0.0561896	0.056011	0.00571008	0.0280739	0.0604041		0.196745	0.285328	37.7
Methanomicrobia_all_prot	0.0794647	0.0632059	0.0393159	0.0670623	0.00953326	0.0330285	0.102766	0.0573379	0.0197743	0.0662556	0.0749968	0.0772812	0.0244558	0.0275408	0.042397	0.0634579	0.054004	0.00496045	0.0245829	0.0685788		0.242405	0.259432	47.4
Micrococcineae_all_prot	0.145116	0.0814172	0.0172556	0.0746988	0.00384862	0.0368209	0.0839803	0.0767856	0.0214584	0.0329758	0.0752768	0.0259072	0.0149317	0.0196638	0.0673722	0.0581246	0.0658784	0.0093678	0.0130119	0.0761084		0.370691	0.123746	69.65
Oceanospirillales_all_prot	0.10235	0.0610604	0.0370374	0.0711231	0.00732417	0.0623542	0.0976201	0.0537063	0.0237685	0.0473773	0.0804068	0.0597092	0.0222822	0.0245309	0.045128	0.0619222	0.052471	0.00796232	0.0201838	0.0616823		0.262245	0.211121	54.4
Pezizomycotina_all_prot	0.102455	0.0552033	0.0393761	0.060681	0.00735251	0.0459351	0.0706407	0.0673529	0.0223692	0.0426321	0.0693219	0.0581077	0.0200008	0.0277189	0.0689802	0.0903408	0.0638311	0.00838995	0.021286	0.0580249		0.293991	0.209122	48.9
Selenomonadales_all_prot	0.0968447	0.0526137	0.0406752	0.0589466	0.0089611	0.0469411	0.0954773	0.0516215	0.0214854	0.0631768	0.0815174	0.0832251	0.026095	0.0282291	0.0371389	0.0517793	0.0537973	0.00574629	0.025523	0.0702054		0.238219	0.266924	48.9
Thaumarchaeota_all_prot	0.0606116	0.0341814	0.0562441	0.0583975	0.00836027	0.03706	0.0782219	0.0498919	0.0173572	0.0860585	0.0780612	0.0979991	0.025682	0.0392506	0.031956	0.0794064	0.0605592	0.0055289	0.0267029	0.0684696		0.176641	0.331937	34.2
Thermoprotei_all_prot	0.0695625	0.0770666	0.0352937	0.0500343	0.00324721	0.0244612	0.103357	0.0544142	0.0144547	0.0669101	0.0868489	0.0925405	0.0235169	0.0285706	0.0438346	0.0567546	0.0406831	0.00996763	0.0367671	0.0817143		0.244878	0.283599	49
Xanthomonadaceae_all_prot	0.15305	0.084153	0.022518	0.0650309	0.00553552	0.0501365	0.0731308	0.0690557	0.0235098	0.0338166	0.0860611	0.0363848	0.0172699	0.0223296	0.0649321	0.0538168	0.0487626	0.0111192	0.0153847	0.0640025		0.371191	0.147704	66.025
Rhodospirillales_all_prot	0.139174	0.0811279	0.0224408	0.0663195	0.00672028	0.0368696	0.0784169	0.0707058	0.0220886	0.0426399	0.0839124	0.040244	0.0225792	0.0258672	0.0623833	0.0507492	0.0554428	0.00914163	0.0164844	0.0666924		0.353391	0.170256	65.0329
Bacillaceae_all_prot	0.0657446	0.0441974	0.0472538	0.0649453	0.00412403	0.0540794	0.12061	0.0475463	0.0235293	0.0626597	0.0773448	0.0901248	0.0231228	0.0322275	0.0343711	0.0567715	0.0535046	0.0068634	0.0280177	0.0629619		0.191859	0.283406	42.15
mean_all_prot	0.0988405	0.0608112	0.0382005	0.0660777	0.00714722	0.0467252	0.0924206	0.0578254	0.0213131	0.0529141	0.0796356	0.0675431	0.0211823	0.0280115	0.0481289	0.0624164	0.0548839	0.00778697	0.0229863	0.0651496
mean_ribosomal_prot	0.0796423	0.0826234	0.0349799	0.0393462	0.0051483	0.0295883	0.053684	0.0957475	0.021436	0.0700727	0.0695107	0.100451	0.0253693	0.0280694	0.04121	0.0524557	0.052487	0.00626209	0.021444	0.0904716
difference ribo - all	-0.0191981	0.0218122	-0.00322061	-0.0267315	-0.00199892	-0.0171368	-0.0387366	0.0379221	0.000122911	0.0171586	-0.0101249	0.0329084	0.00418709	5.79101e-05	-0.00691896	-0.00996072	-0.00239698	-0.00152488	-0.00154226	0.025322
Saccharibacteria_rib	0.087864	0.079077	0.036015	0.03899	0.002174	0.032995	0.044641	0.09212	0.021829	0.068072	0.06766	0.10189	0.023133	0.023316	0.039264	0.056013	0.067179	0.004073	0.020776	0.092921		0.298325	0.273202
Xanthomonadaceae_rib	0.101519	0.084491	0.032125	0.039609	0.004271	0.029303	0.051939	0.099235	0.022376	0.065736	0.06893	0.088038	0.025737	0.026591	0.039274	0.049246	0.052719	0.005849	0.018532	0.094481		0.324519	0.256759
Oceanospirillales_rib	0.091757	0.087774	0.033848	0.04094	0.004448	0.033205	0.056604	0.095508	0.021041	0.060355	0.068411	0.088559	0.026007	0.024792	0.038207	0.052228	0.055479	0.006609	0.016987	0.09724		0.313246	0.250548
Enterobacteriaceae_rib	0.089182	0.086217	0.035488	0.043042	0.004646	0.031361	0.053779	0.092459	0.02036	0.068086	0.068784	0.094395	0.023712	0.028953	0.037527	0.046583	0.055394	0.006979	0.016469	0.096585		0.305385	0.267103
Chromatiales_rib	0.094275	0.101814	0.03179	0.04188	0.004788	0.034855	0.052977	0.099107	0.02273	0.061232	0.068368	0.076087	0.026018	0.025437	0.042708	0.046824	0.048905	0.006823	0.017495	0.095886		0.337904	0.238059
Alteromonadaceae_rib	0.095444	0.087067	0.032768	0.041059	0.004008	0.032819	0.0574	0.095889	0.020195	0.06247	0.067044	0.088541	0.02542	0.025779	0.039945	0.049263	0.054145	0.006612	0.017455	0.096677		0.318345	0.252433
Deltaproteobacteria_rib	0.076189	0.084063	0.034205	0.040721	0.007819	0.028716	0.052859	0.09493	0.020542	0.070424	0.072746	0.102512	0.02626	0.028321	0.041929	0.051509	0.049242	0.006618	0.021284	0.08911		0.297111	0.283006
Comamonadaceae_rib	0.096952	0.085419	0.034279	0.042279	0.004162	0.034906	0.050369	0.094585	0.021633	0.065382	0.067858	0.088737	0.026637	0.025382	0.038691	0.048611	0.054423	0.004395	0.020682	0.094621		0.315647	0.261099
Rhodospirillales_rib	0.094402	0.096377	0.031718	0.043728	0.004433	0.029515	0.050029	0.098647	0.020648	0.059231	0.07417	0.085885	0.022946	0.027916	0.040128	0.048054	0.052635	0.007201	0.017599	0.094738		0.329554	0.245295
Rhodobacteraceae_rib	0.093268	0.090882	0.034928	0.047412	0.004664	0.031647	0.049373	0.099641	0.019597	0.062182	0.066756	0.091099	0.027805	0.027136	0.037848	0.047186	0.053576	0.007891	0.017871	0.089237		0.321639	0.261021
Rhizobiales_rib	0.093623	0.091615	0.032718	0.045053	0.004231	0.030681	0.050714	0.098804	0.022555	0.062341	0.067587	0.089006	0.024692	0.02853	0.039286	0.048891	0.049977	0.006668	0.016902	0.096124		0.323328	0.254189
Nitrospirae_rib	0.075463	0.080944	0.03012	0.037227	0.007465	0.0269	0.053117	0.097533	0.020866	0.076358	0.07195	0.105941	0.027616	0.026071	0.043782	0.053751	0.047945	0.00766	0.022606	0.086685		0.297722	0.288712
Selenomonadales_rib	0.084023	0.074409	0.035933	0.040774	0.00484	0.025874	0.053844	0.100707	0.023242	0.070997	0.065934	0.101488	0.029755	0.025026	0.042603	0.046372	0.052684	0.006089	0.019874	0.095532		0.301742	0.283073
Clostridiales_rib	0.078188	0.074206	0.040399	0.041529	0.005796	0.026568	0.059185	0.096447	0.020417	0.071308	0.063967	0.108196	0.028969	0.023021	0.04162	0.044918	0.051889	0.005928	0.023731	0.093717		0.290461	0.295624
Lactobacillales_rib	0.077927	0.076263	0.044296	0.041794	0.001602	0.02919	0.061142	0.0952	0.019882	0.067856	0.063339	0.099258	0.023773	0.025085	0.039032	0.052505	0.057037	0.005722	0.02182	0.097275		0.288422	0.282088
Bacillaceae_rib	0.076073	0.080474	0.038488	0.042122	0.001245	0.030197	0.065853	0.096767	0.022417	0.067065	0.067338	0.099667	0.025079	0.021599	0.042105	0.048315	0.052103	0.00534	0.023424	0.094327		0.295419	0.275322
Elusimicrobia_rib	0.079355	0.081664	0.032681	0.037238	0.008083	0.028931	0.05251	0.095981	0.022524	0.070452	0.072116	0.102239	0.03016	0.03129	0.043669	0.053106	0.047481	0.008518	0.020773	0.08123		0.300669	0.287595
Cyanobacteria_rib	0.083089	0.101149	0.036421	0.034859	0.006757	0.041181	0.052022	0.097136	0.018211	0.0716	0.069353	0.07477	0.023778	0.022668	0.045025	0.051942	0.055706	0.006189	0.023902	0.084243		0.326399	0.253139
CPR_WWE3_rib	0.068119	0.076756	0.035989	0.036458	0.003822	0.020852	0.051726	0.09727	0.016842	0.073496	0.074658	0.115818	0.023643	0.029732	0.040486	0.067464	0.048654	0.007513	0.022463	0.08824		0.282631	0.301141
CPR_Yanofskybacteria_rib	0.064198	0.07474	0.037753	0.036905	0.002688	0.031447	0.051049	0.09817	0.020237	0.07852	0.071709	0.118472	0.028172	0.033696	0.037899	0.061037	0.046242	0.006403	0.019553	0.081111		0.275007	0.316166
CPR_Uhrbacteria_rib	0.080264	0.08943	0.027989	0.036834	0.003893	0.028632	0.04823	0.094608	0.025835	0.069945	0.069435	0.097651	0.027328	0.028197	0.041993	0.052634	0.057925	0.006993	0.017671	0.094514		0.306295	0.268781
CPR_Nomurabacteria_rib	0.064575	0.075341	0.03727	0.038641	0.002461	0.023403	0.051858	0.09308	0.017479	0.078713	0.066176	0.126848	0.026634	0.033908	0.039842	0.057601	0.053299	0.006584	0.024423	0.081864		0.272838	0.327796
CPR_Moranbacteria_rib	0.070922	0.071734	0.0385	0.03545	0.006186	0.026588	0.059735	0.094154	0.017637	0.078754	0.066469	0.128178	0.028518	0.030602	0.031458	0.057475	0.047691	0.00702	0.018164	0.084765		0.268268	0.322716
CPR_Magasanikbacteria_rib	0.073134	0.072649	0.035088	0.03578	0.005443	0.030484	0.050492	0.093496	0.024304	0.069986	0.068809	0.114181	0.029498	0.031072	0.039944	0.050257	0.054788	0.00715	0.020891	0.092554		0.279223	0.300716
CPR_Kaiserbacteria_rib	0.09065	0.089587	0.026116	0.035986	0.001165	0.027237	0.046802	0.095759	0.020905	0.063864	0.06414	0.101815	0.02434	0.030906	0.043949	0.056905	0.05807	0.006376	0.020308	0.095119		0.319945	0.267349
CPR_Falkowbacteria_rib	0.070416	0.071887	0.041221	0.037977	0.006203	0.030872	0.049307	0.09048	0.020207	0.08241	0.074894	0.123346	0.025745	0.03016	0.039417	0.048326	0.046981	0.006614	0.021156	0.082379		0.2722	0.324038
CPR_Woesebacteria_rib	0.070373	0.078903	0.027796	0.036677	0.003294	0.022623	0.051508	0.101438	0.017274	0.077588	0.07279	0.117309	0.023286	0.030702	0.043604	0.055254	0.046986	0.006326	0.020994	0.095275		0.294318	0.297675
CPR_Roizmannbacteria_rib	0.058403	0.071749	0.034636	0.037649	0.004687	0.029347	0.049611	0.091254	0.020599	0.085608	0.076101	0.128635	0.021447	0.033676	0.038385	0.05481	0.049499	0.005423	0.026736	0.081747		0.259791	0.330738
CPR_Levybacteria_rib	0.065446	0.077374	0.036652	0.037537	0.00384	0.026316	0.047376	0.097053	0.01791	0.084382	0.075799	0.119476	0.023378	0.030829	0.038032	0.06065	0.047677	0.003716	0.021626	0.084931		0.277905	0.316343
CPR_Gottesmanbacteria_rib	0.067518	0.079365	0.030684	0.038313	0.005805	0.030884	0.043643	0.098914	0.021539	0.078434	0.074929	0.108059	0.026047	0.029077	0.04326	0.054376	0.054851	0.005768	0.02194	0.086593		0.289057	0.294241
Chloroflexi_RBG_rib	0.082124	0.099309	0.027055	0.040495	0.005546	0.031897	0.052878	0.100865	0.023641	0.067569	0.073096	0.082446	0.027622	0.025021	0.045317	0.048134	0.050188	0.006622	0.019856	0.09032		0.327615	0.249569
Flavobacteriaceae_rib	0.076474	0.070808	0.040643	0.037574	0.004177	0.030809	0.057097	0.095415	0.016481	0.069736	0.071952	0.109817	0.024825	0.029638	0.034469	0.063144	0.052547	0.004159	0.023772	0.086462		0.277166	0.298431
Cytophagales_rib	0.072605	0.071804	0.039099	0.036237	0.003702	0.029554	0.05425	0.096355	0.018749	0.069532	0.073852	0.10959	0.02467	0.028806	0.03814	0.061077	0.05467	0.004451	0.024184	0.088675		0.278904	0.295881
Bacteroidales_rib	0.073474	0.073107	0.041912	0.034596	0.00614	0.029504	0.057206	0.095221	0.017261	0.074007	0.072684	0.106673	0.026305	0.028125	0.038254	0.057849	0.05204	0.00421	0.025202	0.086232		0.280056	0.302224
Micrococcineae_rib	0.091849	0.096317	0.028489	0.047727	0.001676	0.031214	0.04975	0.1044	0.025772	0.056182	0.06589	0.079077	0.020897	0.023402	0.044291	0.047566	0.061836	0.006195	0.017985	0.099483		0.336857	0.226032
Archaea_Thaumarchaeota_rib	0.069726	0.06663	0.046305	0.038421	0.007289	0.02962	0.051637	0.088761	0.02297	0.081795	0.069009	0.105818	0.024202	0.033433	0.040399	0.054446	0.058746	0.003705	0.022138	0.084948		0.265516	0.313691
Archaea_Methanomicrobia_rib	0.082612	0.083242	0.033912	0.03825	0.007911	0.030114	0.059667	0.097557	0.022428	0.070005	0.06106	0.082904	0.028249	0.024923	0.047779	0.051487	0.05488	0.006113	0.025193	0.091714		0.31119	0.265186
Archaea_Halobacteriaceae_rib	0.089446	0.083399	0.028546	0.067402	0.00293	0.034735	0.087582	0.098972	0.026588	0.044324	0.061621	0.049995	0.019835	0.024144	0.050904	0.047222	0.062655	0.005327	0.018159	0.096215		0.322721	0.185003
Archaea_DPANN_rib	0.067018	0.072293	0.039289	0.033392	0.007936	0.027001	0.056917	0.087948	0.020503	0.085782	0.072658	0.131225	0.023806	0.031033	0.042313	0.053572	0.046237	0.005063	0.023355	0.072658		0.269572	0.33449
Archaea_Thermoprotei_rib	0.075628	0.093213	0.026922	0.031627	0.002412	0.023065	0.059114	0.091143	0.022544	0.074258	0.07737	0.087897	0.023586	0.026401	0.053843	0.042631	0.043003	0.009932	0.030004	0.105408		0.313827	0.269068
Euk_Coelomata_rib	0.071957	0.095738	0.036931	0.034055	0.018763	0.027886	0.047125	0.088241	0.030663	0.065828	0.065888	0.09905	0.025129	0.032607	0.039787	0.048137	0.046054	0.007259	0.028977	0.089926		0.295723	0.288522
Euk_Pezizomycotina_rib	0.077843	0.090825	0.039984	0.029745	0.010381	0.027029	0.052097	0.091178	0.031565	0.064237	0.06497	0.088924	0.022901	0.028224	0.044492	0.054242	0.050929	0.008127	0.03056	0.091748		0.304338	0.27483
Verrucomicrobia_rib	0.081254	0.082702	0.037133	0.037904	0.007595	0.032342	0.053398	0.094714	0.020752	0.067022	0.070691	0.099902	0.023322	0.031758	0.041129	0.053982	0.051972	0.007057	0.018602	0.086769		0.299799	0.277739
Published models (for comparison):
BLOSUM	0.074	0.052	0.045	0.054	0.025	0.034	0.054	0.074	0.026	0.068	0.099	0.058	0.025	0.047	0.039	0.057	0.051	0.013	0.032	0.073		0.239	0.275
cpREV	0.0755	0.0621	0.041	0.0371	0.0091	0.0382	0.0495	0.0838	0.0246	0.0806	0.1011	0.0504	0.022	0.0506	0.0431	0.0622	0.0543	0.0181	0.0307	0.066		0.2645	0.2753
DAYHOFF-dcmut	0.087127	0.040904	0.040432	0.046872	0.033474	0.038255	0.04953	0.088612	0.033619	0.036886	0.085357	0.080481	0.014753	0.039772	0.05068	0.069577	0.058542	0.010494	0.029916	0.064718		0.267323	0.24224
Dayhoff	0.087127	0.040904	0.040432	0.046872	0.033474	0.038255	0.04953	0.088612	0.033618	0.036886	0.085357	0.080482	0.014753	0.039772	0.05068	0.069577	0.058542	0.010494	0.029916	0.064718		0.267323	0.242241
FLU	0.0470718	0.0509102	0.0742143	0.0478596	0.0250216	0.0333036	0.0545874	0.0763734	0.0199642	0.0671336	0.0714981	0.0567845	0.0181507	0.0304961	0.0506561	0.0884091	0.0743386	0.0185237	0.0314741	0.0632292		0.225012	0.278253
HIVb	0.06	0.066	0.044	0.042	0.02	0.054	0.071	0.072	0.022	0.07	0.099	0.057	0.02	0.029	0.046	0.051	0.054	0.033	0.028	0.062		0.244	0.248
HIVw	0.038	0.057	0.089	0.034	0.024	0.044	0.062	0.084	0.016	0.098	0.058	0.064	0.016	0.042	0.046	0.055	0.081	0.02	0.021	0.051		0.225	0.33
JONES-dcmut	0.076862	0.051057	0.042546	0.051269	0.020279	0.041061	0.06182	0.074714	0.022983	0.052569	0.091111	0.059498	0.023414	0.04053	0.050532	0.068225	0.058518	0.014336	0.032303	0.066374		0.253165	0.25086
JTT	0.076748	0.051691	0.042645	0.051544	0.019803	0.040752	0.06183	0.073152	0.022944	0.053761	0.091904	0.058676	0.023826	0.040126	0.050901	0.068765	0.058565	0.014261	0.032102	0.066005		0.252492	0.251136
LG	0.079066	0.055941	0.041977	0.053052	0.012937	0.040767	0.071586	0.057337	0.022355	0.062157	0.099081	0.0646	0.022951	0.042302	0.04404	0.061197	0.053287	0.012066	0.034155	0.069147		0.236384	0.268142
PMB	0.075559	0.053764	0.037684	0.044693	0.028483	0.033893	0.053472	0.078036	0.03004	0.059869	0.095793	0.051997	0.021908	0.045001	0.042029	0.068212	0.056413	0.015725	0.035974	0.071456		0.249388	0.252433
rtREV	0.0646	0.0453	0.0376	0.0422	0.0114	0.0606	0.0607	0.0639	0.0273	0.0679	0.1018	0.0751	0.015	0.0287	0.0681	0.0488	0.0622	0.0251	0.0318	0.0619		0.2419	0.2561
VT	0.077076	0.050082	0.046238	0.053793	0.014453	0.040892	0.063358	0.065567	0.02188	0.059197	0.097646	0.059208	0.02207	0.041351	0.047687	0.07073	0.056776	0.012702	0.032375	0.066919		0.240412	0.260439
WAG	0.0866279	0.043972	0.0390894	0.0570451	0.0193078	0.0367281	0.0580589	0.0832518	0.0244313	0.048466	0.086209	0.0620286	0.0195027	0.0384319	0.0457631	0.0695179	0.0610127	0.0143859	0.0352742	0.0708956		0.259615	0.242793
